# Supplementary material for: Proline: The Distribution, Frequency, Positioning, and Common Functional Roles of Proline and Polyproline Sequences in the Human Proteome
Source: PLoS One. 2013 Jan 25;8(1):e53785. doi: 10.1371/journal.pone.0053785 (PMC3556072; doi:10.1371/journal.pone.0053785)
Supplement: Table S1 — Counts of Amino Acids by Protein Length Across Human Proteome. The counts of each amino acid as a function of relative length are shown. Each protein was divided into 100 segments and the total count of each amino acid in each segment was summed across the proteome. For example, a 200 amino acid long protein with a serine in position 3 and a lysine in position 4 would add a count of one S and one L in the 2% bin along the horizontal axis. Proline peaks in prevalence at the 2% of length position, with 8,215 prolyl residues of a total of 108,671 amino acids (7.6% proline). (XLS) [file pone.0053785.s005.xls]

## Sheet: aminoAcidPositionCounts.humanPe
AminoAcid	1	2	3	4	5	6	7	8	9	10	11	12	13	14	15	16	17	18	19	20	21	22	23	24	25	26	27	28	29	30	31	32	33	34	35	36	37	38	39	40	41	42	43	44	45	46	47	48	49
R	6963	7502	7040	6806	6818	6946	6686	6631	6451	6680	6336	6236	6218	6155	6170	6138	6140	6252	6041	6183	6072	6106	6023	6054	6095	5755	6028	6003	6063	6129	5962	5828	5820	5925	6059	5832	5956	6032	5883	6195	5890	6117	5911	5883	6054	5875	5847	5874	5912
H	1646	2005	2195	2302	2374	2476	2585	2594	2604	2630	2619	2701	2658	2648	2769	2667	2763	3152	2792	2827	2749	2901	2860	2882	2946	2735	2844	2878	2910	2939	2810	2866	2725	2895	2844	2854	2887	2891	2870	2909	2899	3041	2945	2874	2882	2848	2871	3015	2867
K	4666	4946	5272	5275	5527	5382	5625	5703	5815	5781	5922	6028	5980	6041	5836	5966	6085	5907	6127	6424	6175	6088	6354	6258	6276	6226	6124	6580	6553	6433	6391	6474	6464	6256	6317	6219	6271	6245	6402	6348	6176	6390	6424	6371	6603	6384	6302	6420	6375
D	4043	4434	4612	4785	4913	4983	5094	5100	5166	5156	5018	5044	5184	5234	5296	5340	5274	5181	5240	5484	5140	5415	5475	5327	5424	5266	5522	5359	5345	5326	5117	5260	5259	5153	5207	5328	5279	5360	5375	5386	5259	5355	5164	5260	5084	5218	5265	5193	5164
E	6953	6825	7411	7606	7407	7577	7498	7549	7329	7651	7678	7850	7757	7597	7815	7885	7797	7907	7613	7940	7575	7793	7683	7802	7898	7600	7651	7947	7981	8001	7689	7849	7876	7861	7862	7860	7801	7775	7621	7890	7728	7763	7867	8021	7754	7937	7772	7785	7827
S	9746	9657	9316	9330	8891	9137	8816	9001	8779	8914	8989	9038	8841	8909	9111	8871	8995	8918	9049	8986	8826	8768	9075	9111	9093	8680	8842	8811	8805	8891	8799	8885	8683	8958	8868	8840	8827	8927	8869	8903	8769	8703	9034	8883	9011	8899	8927	9028	9036
T	4857	5130	5200	5292	5312	5308	5277	5408	5534	5441	5479	5588	5621	5653	5706	5792	5711	5706	5711	5649	5427	5894	5612	5893	5854	5622	5638	5790	5759	5779	5648	5734	5869	6010	5961	5868	5835	5802	5830	5855	5871	5868	6008	5937	5830	5682	5995	5954	5784
N	2718	3019	2992	3170	3455	3554	3767	3730	3626	3850	3822	3951	4032	3971	3978	3833	3895	3855	3941	4034	4109	3993	3994	4078	4140	3891	4204	4093	4120	4094	3989	3985	3997	3897	4055	4040	3945	3995	3994	4093	3928	4069	3994	4096	4064	4061	4031	3995	4043
Q	3662	4490	4804	4822	4794	5045	5087	5122	5074	5223	4946	5061	5181	5117	5129	5023	5223	5212	5087	5306	5204	5303	5168	5190	5157	5007	5189	5156	5190	5177	5236	5301	5172	5319	5087	5158	5250	5228	5186	5280	5189	5142	5184	5269	5031	5097	5228	5092	5030
C	1732	2408	2519	2609	2452	2457	2484	2476	2415	2470	2483	2406	2452	2511	2373	2430	2453	2337	2488	2467	2430	2524	2532	2520	2545	2418	2456	2581	2518	2586	2630	2505	2441	2514	2478	2599	2536	2447	2551	2623	2536	2520	2477	2513	2626	2603	2456	2458	2460
U	0	0	0	0	0	0	0	0	0	0	0	0	1	0	0	1	0	0	0	0	1	1	0	1	0	0	0	0	1	0	0	2	1	0	0	1	1	0	0	0	0	0	0	0	0	0	0	0	0
G	8115	8846	8691	8673	8595	8222	8056	7861	7804	7864	7670	7489	7649	7738	7398	7438	7455	7442	7282	7297	7187	7050	7164	7166	7235	6859	6949	6999	6996	6972	7169	7229	6998	7039	7189	7038	7048	6947	7061	7313	6854	6985	6953	7061	6913	6970	6923	7175	7131
P	7427	8215	7788	7650	7523	7385	7379	7413	6976	7009	6734	6926	6960	6758	6958	6734	6687	6629	6864	6635	6432	6532	6550	6526	6954	6626	6660	6616	6625	6761	6637	6678	6659	6396	6509	6670	6428	6598	6621	6626	6447	6720	6691	6612	6578	6584	6726	6654	6785
A	12298	10007	9303	8877	8866	8539	8546	8371	8167	8232	7845	7992	7638	7849	7672	7843	7647	7556	7521	7654	7310	7591	7528	7386	7617	7411	7489	7545	7313	7454	7501	7345	7407	7438	7534	7424	7240	7522	7529	7698	7219	7314	7271	7380	7394	7405	7440	7403	7376
V	5143	6233	6346	6510	6458	6394	6566	6447	6543	6736	6563	6744	6637	6695	6789	6669	6537	6606	6520	6529	6435	6625	6505	6543	6753	6608	6684	6652	6563	6529	6515	6664	6551	6691	6709	6696	6672	6727	6571	6729	6426	6581	6698	6731	6762	6541	6667	6584	6553
I	2402	3281	3570	3823	3873	3931	4093	4224	4408	4371	4519	4635	4650	4676	4859	4850	4653	4732	4630	4887	4688	4732	4831	4915	5006	4790	4817	4853	4803	5059	4644	4792	4860	4838	4826	4862	4859	4965	4984	5048	5016	4860	4816	4972	4931	4944	4904	4872	4865
L	9834	12786	12292	12208	11995	11472	11195	11330	11379	11479	11036	11010	10841	11175	11000	10851	10864	11165	10934	11359	10939	10894	10737	10702	10969	10610	10942	10758	10418	10766	10516	10984	10828	10739	10862	10884	11011	10748	10587	10883	10577	10904	10550	10594	10655	10925	10688	10729	10752
M	1592	1711	1647	1647	1742	1796	1839	1862	1865	1828	1938	1965	1962	2009	1972	1987	2046	1994	2191	2126	1982	2050	2070	2150	2125	2178	2159	2125	2062	2099	2161	2181	2140	2168	2203	2090	2338	2308	2215	2239	2104	2253	2284	2295	2268	2248	2164	2220	2197
F	2856	3609	3709	3819	3856	3739	3856	3882	4190	4191	3959	4067	3869	3833	3876	3922	3897	3931	4116	4246	3904	4165	4003	4021	4174	3886	4026	4049	4068	4135	4137	4173	4220	4288	4104	4071	4024	3975	3982	4004	3845	3853	3944	3917	3958	3976	4093	3977	3999
Y	1291	1887	2085	2186	2434	2566	2638	2733	2752	2695	2810	2892	2829	2837	2761	2945	2800	2899	3150	2974	2903	2941	2996	2972	2951	2962	2992	2871	2933	2950	2894	2975	2964	3109	2982	2900	2930	2953	3154	3032	2930	3007	2979	2947	3023	2922	2943	2998	2932
W	1575	1663	1620	1496	1460	1427	1499	1416	1442	1337	1403	1277	1366	1367	1396	1374	1360	1349	1314	1320	1416	1346	1366	1380	1399	1325	1278	1317	1339	1304	1395	1251	1302	1244	1253	1272	1288	1238	1261	1275	1244	1266	1268	1378	1244	1296	1297	1412	1263
X	14	17	16	17	19	16	17	15	17	18	16	17	16	18	18	15	16	17	17	18	16	18	16	17	17	15	18	16	18	17	16	17	16	17	18	16	17	16	17	18	16	16	17	18	17	16	16	18	17
Percent Proline	0.0746185	0.0755951	0.0718265	0.070246	0.0691681	0.0681575	0.0679447	0.0680916	0.0643923	0.0639764	0.0624762	0.0635897	0.064241	0.0621191	0.063904	0.0620222	0.0617463	0.060958	0.0631881	0.0601296	0.0601571	0.0600754	0.0603453	0.0599298	0.0628593	0.0622335	0.0613757	0.0606978	0.0611258	0.0618002	0.0615358	0.0612784	0.0615139	0.0588111	0.0597556	0.0614622	0.0592754	0.0606997	0.0609876	0.0600469	0.0602957	0.0618062	0.0616801	0.0606539	0.0605252	0.0607206	0.0619594	0.0611266	0.0626107
Total	99533	108671	108428	108903	108764	108352	108603	108868	108336	109556	107785	108917	108342	108791	108882	108574	108298	108747	108628	110345	106920	108730	108542	108894	110628	106470	108512	108999	108383	109401	107856	108978	108252	108755	108927	108522	108443	108699	108563	110347	106923	108727	108479	109012	108682	108431	108555	108856	108368
[truncated: 51 more columns]
