# Supplementary material for: Proline: The Distribution, Frequency, Positioning, and Common Functional Roles of Proline and Polyproline Sequences in the Human Proteome
Source: PLoS One. 2013 Jan 25;8(1):e53785. doi: 10.1371/journal.pone.0053785 (PMC3556072; doi:10.1371/journal.pone.0053785)
Supplement: Table S2 — Distribution of Proline and Polyproline Across the Human Proteome. This table compiles the counts of proline and polyproline spans by gene. The first column is the gene symbol, followed by the length of the longest span of proline in the protein (MaxSpan). NumberPolyproline indicates the number of spans of continuous proline of 3 or more members. PeptideLength is the overall protein length in residues. PolyprolineValues is a shorthand summary of the appearance of spans of contiguous proline; for example, “PPPP:207:210 PPP:399:401” indicates that there are four prolines at positions 207–210, and another three at positions 399–401. There is a column for each canonical amino acid, with the counts for each in the protein. The P column shows the total number of prolyl residues in the protein. PinPolyproline and PNotPolyproline give the number of proline in polyproline spans and not in polyproline spans, respectively. LeftStart indicates the position of the start of the first polyproline span, whereas LeftStartRatio scales this by the total protein length. RightEnd and RightEndRatio indicate the end position of the final polyproline in the peptide. SingletCount is the number of single prolines, and DimerCount is the count of non-overlapping dyads of the prolyl residues. (XLS) [file pone.0053785.s006.xls]

## Sheet: polyProlineCounts.humanPeptide.
GeneSymbol	MaxSpan	NumberPolyproline	PeptideLength	PolyprolineValues	A	R	N	D	C	E	Q	G	H	I	L	K	M	F	P	S	T	W	Y	V	PInPolyproline	PNotPolyproline	LeftStart	LeftStartRatio	RightEnd	RightEndRatio	SingletCount	DimerCount
A1BG	4	2	495	PPPP:207:210 PPP:399:401	40	33	11	19	10	40	15	39	16	9	61	11	4	19	43	37	31	9	10	38	7	36	207	0.418182	401	0.810101	34	1
A1CF	3	1	594	PPP:43:45	60	32	24	26	5	38	23	56	8	30	46	37	16	19	37	24	37	4	31	41	3	34	43	0.0723906	45	0.0757576	30	2
A2LD1	0	0	153	NA	14	16	4	7	2	12	5	12	7	2	17	1	2	6	15	6	5	2	7	11	0	15	NA	NA	NA	NA	11	2
A2M	0	0	1489	NA	94	47	65	53	27	104	74	91	40	57	143	89	26	63	81	125	101	11	57	141	0	81	NA	NA	NA	NA	77	2
A2ML1	3	1	1454	PPP:84:86	91	42	60	66	25	81	82	97	24	65	144	78	31	67	85	122	101	17	62	114	3	82	84	0.0577717	86	0.0591472	80	1
A4GALT	0	0	436	NA	36	32	16	15	9	25	13	33	14	15	57	13	9	20	38	22	22	13	10	24	0	38	NA	NA	NA	NA	28	5
A4GNT	0	0	340	NA	15	21	17	11	8	24	9	17	11	17	39	11	10	21	21	33	13	10	15	17	0	21	NA	NA	NA	NA	19	1
AAAS	5	3	546	PPPPP:8:12 PPP:34:36 PPP:534:536	38	30	14	18	15	26	17	45	18	21	61	14	4	21	53	53	34	21	5	38	11	42	8	0.014652	536	0.981685	40	1
AACS	0	0	672	NA	45	28	26	29	10	52	20	53	17	38	60	41	21	28	31	52	27	15	23	56	0	31	NA	NA	NA	NA	31	0
AADAC	0	0	399	NA	22	22	21	22	2	18	11	24	12	19	53	22	7	20	19	27	17	8	21	32	0	19	NA	NA	NA	NA	17	1
AADACL2	0	0	401	NA	23	25	13	25	7	18	14	22	13	23	52	18	13	21	18	21	25	5	19	26	0	18	NA	NA	NA	NA	18	0
AADACL3	0	0	350	NA	18	17	5	21	14	16	15	20	11	20	38	20	10	19	23	22	11	5	13	32	0	23	NA	NA	NA	NA	21	1
AADACL4	0	0	407	NA	29	21	13	22	11	15	13	22	12	26	51	21	6	26	26	24	13	7	15	34	0	26	NA	NA	NA	NA	24	1
AADAT	0	0	429	NA	30	17	21	21	3	23	18	26	8	32	43	26	15	20	31	37	17	6	12	23	0	31	NA	NA	NA	NA	27	2
AAGAB	0	0	315	NA	25	9	14	26	6	26	12	18	9	14	28	15	6	11	14	29	15	6	4	28	0	14	NA	NA	NA	NA	14	0
AAK1	3	3	961	PPP:398:400 PPP:478:480 PPP:607:609	79	32	33	45	13	43	112	65	15	40	84	49	13	33	94	80	62	3	15	51	9	85	398	0.414152	609	0.633715	77	4
AAMP	0	0	435	NA	34	13	7	35	12	41	15	43	11	10	40	15	7	13	21	31	31	11	5	40	0	21	NA	NA	NA	NA	17	2
AANAT	0	0	252	NA	17	24	1	4	9	18	8	20	13	9	33	7	6	13	24	17	9	5	3	12	0	24	NA	NA	NA	NA	20	2
AARS	0	0	968	NA	89	49	34	75	13	65	42	78	17	49	92	66	24	37	35	49	52	8	26	68	0	35	NA	NA	NA	NA	35	0
AARS2	0	0	985	NA	104	74	19	48	18	65	61	84	23	23	121	23	21	26	55	59	49	14	17	81	0	55	NA	NA	NA	NA	45	5
AARSD1	3	1	586	PPP:179:181	38	38	23	40	11	46	22	42	19	25	55	38	12	19	25	39	30	12	6	46	3	22	179	0.305461	181	0.308874	20	1
AASDH	0	0	1098	NA	45	33	47	45	35	65	41	68	33	64	127	74	15	50	46	106	66	15	35	88	0	46	NA	NA	NA	NA	44	1
AASDHPPT	0	0	309	NA	21	20	12	17	4	26	12	16	6	18	24	21	9	24	19	20	12	9	4	15	0	19	NA	NA	NA	NA	19	0
AASS	0	0	926	NA	68	39	32	46	13	62	29	78	30	65	101	56	31	23	48	58	46	6	36	59	0	48	NA	NA	NA	NA	46	1
AATF	0	0	560	NA	37	36	11	54	2	64	26	39	13	16	58	43	10	20	28	45	22	5	9	22	0	28	NA	NA	NA	NA	26	1
AATK	0	0	1374	NA	145	60	23	71	31	122	55	130	20	12	136	35	14	48	155	144	58	16	24	75	0	155	NA	NA	NA	NA	139	8
ABAT	0	0	500	NA	36	30	22	28	12	29	21	35	16	31	49	30	15	30	26	32	17	5	12	24	0	26	NA	NA	NA	NA	24	1
ABCA1	3	1	2261	PPP:1485:1487	124	102	103	115	39	128	88	147	40	128	256	129	62	118	105	180	120	40	69	168	3	102	1485	0.656789	1487	0.657674	88	7
ABCA10	0	0	1543	NA	77	58	59	65	31	107	54	86	33	124	187	100	48	100	57	116	82	23	46	90	0	57	NA	NA	NA	NA	55	1
ABCA12	0	0	2595	NA	132	102	136	113	41	136	102	135	56	177	318	152	70	139	112	233	162	29	98	152	0	112	NA	NA	NA	NA	102	5
ABCA13	0	0	5058	NA	234	158	295	226	83	302	245	212	144	318	710	290	119	313	171	452	290	81	120	295	0	171	NA	NA	NA	NA	153	9
ABCA2	4	2	2466	PPP:345:347 PPPP:1621:1624	197	134	85	106	42	141	104	175	54	102	294	97	60	114	147	200	129	36	77	172	7	140	345	0.139903	1624	0.658556	112	14
ABCA3	3	2	1708	PPP:3:5 PPP:134:136	144	95	42	69	27	100	67	109	43	79	232	74	44	102	85	122	88	24	52	110	6	79	3	0.00175644	136	0.0796253	71	4
ABCA4	3	2	2273	PPP:1333:1335 PPP:1510:1512	132	112	90	106	43	137	98	151	52	135	275	96	56	122	129	157	134	42	65	141	6	123	1333	0.58645	1512	0.6652	115	4
ABCA5	0	0	1643	NA	92	44	56	70	26	101	57	76	32	141	188	119	51	104	62	146	84	22	64	108	0	62	NA	NA	NA	NA	56	3
ABCA6	0	0	1617	NA	76	59	71	63	27	101	67	86	34	128	216	103	52	103	60	121	93	20	49	88	0	60	NA	NA	NA	NA	60	0
ABCA7	4	1	2146	PPPP:1366:1369	199	150	44	87	36	119	86	183	51	44	330	50	40	92	152	147	99	35	40	162	4	148	1366	0.636533	1369	0.637931	126	11
ABCA8	0	0	1621	NA	96	66	62	71	30	102	64	90	32	101	211	104	46	105	64	126	79	20	50	102	0	64	NA	NA	NA	NA	56	4
ABCA9	0	0	1624	NA	88	66	58	71	28	101	67	98	35	119	205	97	47	108	62	122	82	23	49	98	0	62	NA	NA	NA	NA	60	1
ABCB1	0	0	1280	NA	117	63	53	56	7	75	53	99	19	104	119	85	32	70	29	88	69	11	35	96	0	29	NA	NA	NA	NA	27	1
ABCB10	0	0	738	NA	84	56	23	21	7	36	19	76	6	36	91	27	15	31	44	60	29	11	16	50	0	44	NA	NA	NA	NA	36	4
ABCB11	0	0	1321	NA	113	69	47	66	20	77	65	101	16	105	112	66	36	77	38	97	74	13	38	91	0	38	NA	NA	NA	NA	34	2
ABCB4	0	0	1286	NA	129	56	53	54	10	73	63	103	18	104	119	80	27	78	31	86	67	12	35	88	0	31	NA	NA	NA	NA	29	1
ABCB5	0	0	1257	NA	116	55	52	54	13	78	56	90	21	103	125	77	34	59	32	92	75	8	38	79	0	32	NA	NA	NA	NA	32	0
ABCB6	0	0	842	NA	72	60	26	29	10	43	44	69	10	44	115	19	16	36	29	54	51	22	27	66	0	29	NA	NA	NA	NA	29	0
ABCB7	0	0	753	NA	74	40	33	31	5	34	30	60	20	44	80	42	19	30	23	52	43	10	23	60	0	23	NA	NA	NA	NA	21	1
ABCB8	3	1	735	PPP:720:722	67	54	15	19	15	41	34	69	18	21	100	21	18	31	34	51	41	9	12	65	3	31	720	0.979592	722	0.982313	25	3
ABCB9	3	1	769	PPP:164:166	67	39	24	26	8	37	35	57	17	43	91	26	19	39	27	61	43	10	27	73	3	24	164	0.213264	166	0.215865	22	1
ABCC1	0	0	1541	NA	111	69	55	69	25	87	60	88	25	101	181	79	40	76	58	129	78	30	49	131	0	58	NA	NA	NA	NA	52	3
ABCC10	0	0	1492	NA	160	78	34	45	27	74	81	124	33	52	280	35	18	42	86	95	68	27	37	96	0	86	NA	NA	NA	NA	74	6
ABCC11	0	0	1382	NA	89	69	46	47	29	78	58	91	31	103	173	65	41	70	51	112	75	17	36	101	0	51	NA	NA	NA	NA	47	2
ABCC12	0	0	1359	NA	94	74	41	57	25	78	50	78	29	84	163	74	38	71	52	99	91	18	32	111	0	52	NA	NA	NA	NA	46	3
ABCC2	3	1	1545	PPP:1290:1292	88	68	71	68	20	81	66	85	26	114	198	92	38	84	46	133	92	27	39	109	3	43	1290	0.834951	1292	0.836246	43	0
ABCC3	0	0	1527	NA	130	74	50	65	25	71	66	98	31	89	204	58	36	74	69	116	74	29	43	125	0	69	NA	NA	NA	NA	61	4
ABCC4	3	1	1325	PPP:1031:1033	93	65	47	57	16	76	57	73	28	93	167	75	29	66	47	93	81	24	39	99	3	44	1031	0.778113	1033	0.779623	42	1
ABCC5	0	0	1437	NA	108	84	45	58	19	92	54	89	37	98	167	83	43	63	49	118	81	17	33	99	0	49	NA	NA	NA	NA	45	2
ABCC6	0	0	1503	NA	149	89	30	51	28	71	84	111	29	56	210	50	24	69	78	116	68	35	27	128	0	78	NA	NA	NA	NA	66	6
ABCC8	0	0	1582	NA	129	85	50	66	28	81	71	84	38	112	212	66	36	81	61	114	92	23	39	114	0	61	NA	NA	NA	NA	57	2
ABCC9	0	0	1549	NA	109	71	74	67	24	85	55	84	34	115	203	78	44	74	50	108	105	25	47	97	0	50	NA	NA	NA	NA	46	2
ABCD1	3	1	745	PPP:534:536	80	59	13	24	9	51	36	55	17	32	94	28	17	23	35	47	29	12	27	57	3	32	534	0.716779	536	0.719463	32	0
ABCD2	3	1	740	PPP:538:540	63	35	19	32	10	45	26	46	21	54	77	57	24	23	27	48	43	11	32	47	3	24	538	0.727027	540	0.72973	24	0
ABCD3	0	0	683	NA	32	47	26	30	10	42	23	51	19	41	83	44	22	33	21	40	32	6	33	48	0	21	NA	NA	NA	NA	19	1
ABCD4	0	0	606	NA	29	34	13	30	8	32	32	44	10	32	92	23	14	32	25	47	37	10	24	38	0	25	NA	NA	NA	NA	23	1
ABCE1	0	0	599	NA	37	29	23	36	17	37	24	36	9	44	57	53	15	24	31	30	30	2	20	45	0	31	NA	NA	NA	NA	29	1
ABCF1	3	1	845	PPP:617:619	62	45	28	46	8	105	57	57	14	30	79	101	15	23	43	35	33	5	18	41	3	40	617	0.730178	619	0.732544	30	5
ABCF2	3	1	634	PPP:392:394	42	35	23	34	11	56	25	36	25	32	76	54	24	17	29	27	34	7	16	31	3	26	392	0.618297	394	0.621451	22	2
ABCF3	0	0	709	NA	58	57	23	40	7	62	37	49	15	29	88	35	13	27	26	49	25	5	18	46	0	26	NA	NA	NA	NA	24	1
ABCG1	0	0	824	NA	64	42	21	29	23	39	27	66	21	38	100	31	30	41	38	69	42	12	27	64	0	38	NA	NA	NA	NA	32	3
ABCG2	0	0	655	NA	47	22	34	21	12	30	20	48	10	45	77	40	19	42	24	56	38	5	22	43	0	24	NA	NA	NA	NA	24	0
ABCG4	0	0	646	NA	48	31	15	18	19	37	18	43	13	31	87	31	26	38	34	44	38	4	23	48	0	34	NA	NA	NA	NA	26	4
ABCG5	0	0	651	NA	37	38	24	21	13	27	29	46	13	40	84	24	20	37	27	55	38	5	19	54	0	27	NA	NA	NA	NA	27	0
ABCG8	0	0	673	NA	46	40	21	31	14	26	33	46	11	40	90	23	21	36	33	54	35	11	26	36	0	33	NA	NA	NA	NA	33	0
ABHD1	0	0	405	NA	37	22	11	21	9	15	29	22	10	18	60	7	2	18	26	26	24	7	16	25	0	26	NA	NA	NA	NA	26	0
ABHD10	0	0	306	NA	26	16	8	18	6	13	7	20	10	20	34	20	8	7	18	24	10	8	8	25	0	18	NA	NA	NA	NA	18	0
ABHD11	0	0	315	NA	30	26	8	15	1	12	18	24	13	13	39	5	10	12	23	23	11	4	4	24	0	23	NA	NA	NA	NA	23	0
ABHD12	0	0	404	NA	33	28	11	23	8	18	11	30	14	22	40	20	5	19	29	27	14	10	17	25	0	29	NA	NA	NA	NA	27	1
ABHD12B	0	0	362	NA	27	19	13	21	10	18	4	23	11	19	39	25	8	17	25	21	16	8	13	25	0	25	NA	NA	NA	NA	19	3
ABHD13	0	0	337	NA	16	16	14	11	4	16	8	19	9	30	46	15	12	18	19	31	15	7	16	15	0	19	NA	NA	NA	NA	17	1
ABHD14A	0	0	271	NA	22	15	9	6	4	11	14	22	14	5	50	5	4	9	20	17	13	4	7	20	0	20	NA	NA	NA	NA	18	1
ABHD14B	0	0	210	NA	24	7	4	7	2	10	13	21	7	9	27	6	4	9	18	14	8	2	5	13	0	18	NA	NA	NA	NA	16	1
ABHD15	0	0	468	NA	41	46	6	21	15	30	9	44	14	12	66	6	1	22	36	35	17	11	11	25	0	36	NA	NA	NA	NA	32	2
ABHD16A	0	0	601	NA	58	51	20	23	11	33	26	42	17	20	67	16	13	21	36	45	28	14	24	36	0	36	NA	NA	NA	NA	36	0
ABHD16B	0	0	469	NA	46	46	9	17	12	28	15	40	17	4	64	7	9	17	29	24	17	12	16	40	0	29	NA	NA	NA	NA	25	2
ABHD2	0	0	425	NA	26	18	17	20	14	26	17	25	13	18	49	23	16	19	22	24	22	5	21	30	0	22	NA	NA	NA	NA	18	2
ABHD3	0	0	409	NA	21	18	15	17	9	19	14	29	14	17	46	16	14	21	20	36	27	6	20	30	0	20	NA	NA	NA	NA	18	1
ABHD4	0	0	342	NA	21	24	11	21	3	17	12	23	9	19	28	14	12	16	25	27	18	11	8	23	0	25	NA	NA	NA	NA	23	1
ABHD5	0	0	349	NA	23	19	14	18	8	23	8	29	9	20	34	18	7	16	24	23	17	9	11	19	0	24	NA	NA	NA	NA	24	0
ABHD6	0	0	337	NA	17	15	12	18	8	13	18	19	13	19	38	21	12	14	16	25	10	5	13	31	0	16	NA	NA	NA	NA	16	0
ABHD8	4	1	439	PPPP:57:60	45	25	10	18	11	29	10	42	14	14	47	19	10	19	35	30	14	4	10	33	4	31	57	0.129841	60	0.136674	25	3
ABI1	8	4	509	PPP:280:282 PPPPP:365:369 PPPPPPP:396:402 PPPPPPPP:412:419	36	26	27	25	2	24	22	33	11	34	27	21	11	5	68	46	38	3	22	28	23	45	280	0.550098	419	0.823183	31	7
ABI2	7	2	513	PPPPPP:402:407 PPPPPPP:417:423	37	28	23	21	1	32	20	32	9	23	28	17	12	9	69	55	37	3	23	34	13	56	402	0.783626	423	0.824561	34	11
ABI3	5	4	366	PPPPP:243:247 PPPP:264:267 PPPPP:278:282 PPPPP:291:295	34	20	8	16	6	26	15	29	5	8	40	10	6	9	52	26	22	2	9	23	19	33	243	0.663934	295	0.806011	21	6
ABI3BP	3	1	1777	PPP:107:109	80	105	40	49	12	123	71	72	25	74	118	137	11	45	272	145	248	13	28	109	3	269	107	0.0602138	109	0.0613393	243	13
ABL1	5	2	1149	PPP:801:803 PPPPP:918:922	99	67	41	43	12	90	36	93	28	33	94	82	18	31	94	117	65	13	29	64	8	86	801	0.697128	922	0.802437	76	5
ABL2	5	2	1182	PPPPP:984:988 PPP:1042:1044	98	61	42	48	18	82	45	97	26	34	100	75	23	34	93	112	74	13	33	74	8	85	984	0.832487	1044	0.883249	75	5
ABLIM1	0	0	846	NA	38	68	23	42	33	50	32	58	33	36	61	54	18	32	69	84	45	4	33	33	0	69	NA	NA	NA	NA	61	4
ABLIM2	3	1	645	PPP:441:443	38	45	14	43	31	30	26	50	21	24	47	37	9	21	42	76	28	5	29	29	3	39	441	0.683721	443	0.686822	35	2
ABLIM3	0	0	683	NA	31	52	18	32	30	40	28	44	27	33	42	39	13	21	43	81	35	6	43	25	0	43	NA	NA	NA	NA	37	3
ABP1	3	1	770	PPP:758:760	51	46	28	32	7	44	32	58	36	22	70	24	13	42	65	47	47	18	34	54	3	62	758	0.984416	760	0.987013	56	3
ABR	0	0	859	NA	44	35	30	49	10	69	39	40	22	45	95	72	21	36	47	68	47	7	28	55	0	47	NA	NA	NA	NA	41	3
ABRA	0	0	381	NA	23	32	8	21	4	35	22	32	13	16	22	28	9	7	24	27	19	8	8	23	0	24	NA	NA	NA	NA	20	2
ABT1	3	1	272	PPP:257:259	34	36	4	11	1	29	12	18	6	4	20	16	3	12	15	16	11	4	7	13	3	12	257	0.944853	259	0.952206	10	1
ABTB1	3	1	478	PPP:230:232	42	37	6	40	21	34	13	25	12	12	59	18	7	20	23	26	17	5	19	42	3	20	230	0.481172	232	0.485356	16	2
ABTB2	0	0	1025	NA	94	68	34	49	20	70	44	65	35	37	126	28	36	30	46	101	47	12	30	53	0	46	NA	NA	NA	NA	40	3
ACAA1	0	0	424	NA	52	26	12	19	10	20	19	46	4	24	35	19	12	9	24	28	23	1	6	35	0	24	NA	NA	NA	NA	20	2
ACAA2	0	0	397	NA	45	16	12	19	8	20	17	41	8	22	34	26	9	11	16	28	20	2	8	35	0	16	NA	NA	NA	NA	14	1
ACACA	0	0	2383	NA	149	150	105	128	30	164	104	145	64	150	220	109	77	98	113	164	112	31	80	190	0	113	NA	NA	NA	NA	101	6
ACACB	0	0	2458	NA	170	145	91	125	35	177	106	159	67	154	237	121	71	102	131	165	121	29	77	175	0	131	NA	NA	NA	NA	121	5
ACAD10	0	0	1090	NA	92	75	28	42	20	72	46	71	29	50	120	49	30	44	78	67	54	19	33	71	0	78	NA	NA	NA	NA	68	5
ACAD11	0	0	780	NA	62	36	31	30	14	48	41	54	24	54	75	47	19	34	37	53	38	12	24	47	0	37	NA	NA	NA	NA	35	1
ACAD8	0	0	415	NA	41	24	14	17	15	23	20	41	8	21	37	19	14	18	13	31	18	4	10	27	0	13	NA	NA	NA	NA	11	1
ACAD9	0	0	621	NA	48	37	24	25	11	48	20	51	11	40	70	39	15	29	17	39	40	2	16	39	0	17	NA	NA	NA	NA	15	1
ACADL	0	0	430	NA	41	21	13	15	7	35	16	39	17	31	34	30	11	17	14	29	15	7	12	26	0	14	NA	NA	NA	NA	14	0
ACADM	0	0	454	NA	50	26	19	20	10	33	20	42	6	28	38	29	13	20	16	16	24	5	17	22	0	16	NA	NA	NA	NA	16	0
ACADS	0	0	412	NA	62	21	10	16	6	25	17	35	6	26	43	22	16	13	17	25	22	6	9	15	0	17	NA	NA	NA	NA	17	0
ACADSB	0	0	432	NA	38	15	16	15	6	31	20	38	9	31	42	29	11	18	14	30	27	3	17	22	0	14	NA	NA	NA	NA	12	1
ACADVL	0	0	701	NA	76	43	19	25	8	46	30	79	11	29	69	40	22	31	30	48	33	6	10	46	0	30	NA	NA	NA	NA	28	1
ACAN	0	0	2530	NA	178	79	30	114	34	284	63	309	33	88	195	28	13	68	231	309	204	25	49	196	0	231	NA	NA	NA	NA	217	7
ACAP1	0	0	740	NA	74	61	18	35	16	59	36	59	23	23	89	34	13	22	38	52	29	8	9	42	0	38	NA	NA	NA	NA	28	5
ACAP2	0	0	778	NA	57	42	39	47	17	65	49	39	15	31	73	65	18	33	22	67	28	6	18	47	0	22	NA	NA	NA	NA	20	1
ACAP3	0	0	834	NA	85	63	14	55	23	67	47	46	17	22	88	43	13	30	32	77	28	9	13	62	0	32	NA	NA	NA	NA	30	1
ACAT1	0	0	427	NA	51	16	19	15	5	24	13	39	5	26	37	30	17	7	19	28	21	2	11	42	0	19	NA	NA	NA	NA	19	0
ACAT2	0	0	426	NA	48	22	14	15	10	22	13	46	9	28	35	21	12	9	20	32	21	5	3	41	0	20	NA	NA	NA	NA	20	0
ACBD3	3	2	528	PPP:36:38 PPP:40:42	41	39	17	20	5	76	38	32	10	12	41	30	9	15	32	31	17	6	22	35	6	26	36	0.0681818	42	0.0795455	24	1
ACBD4	0	0	341	NA	19	30	4	8	18	19	15	33	4	8	21	12	8	10	42	37	12	13	10	18	0	42	NA	NA	NA	NA	32	5
ACBD5	0	0	534	NA	25	29	24	32	8	50	32	47	13	23	33	32	18	17	22	49	26	12	12	30	0	22	NA	NA	NA	NA	20	1
ACBD6	0	0	282	NA	23	9	11	18	8	27	14	22	9	13	26	20	2	9	12	19	13	4	7	16	0	12	NA	NA	NA	NA	12	0
ACBD7	0	0	88	NA	12	3	2	8	1	7	2	7	0	6	10	12	2	1	2	3	2	2	4	2	0	2	NA	NA	NA	NA	2	0
ACCN1	3	1	563	PPP:334:336	40	37	19	19	18	45	18	51	14	23	67	24	13	28	35	34	31	8	18	21	3	32	334	0.59325	336	0.596803	28	2
ACCN2	3	2	574	PPP:284:286 PPP:466:468	40	26	17	31	26	44	23	39	19	24	57	34	14	32	33	31	25	3	25	31	6	27	284	0.494774	468	0.815331	25	1
ACCN3	3	2	549	PPP:276:278 PPP:526:528	45	39	17	23	19	31	22	39	15	17	61	10	16	21	54	45	25	5	18	27	6	48	276	0.502732	528	0.961749	36	6
ACCN4	0	0	666	NA	66	51	17	24	21	44	28	68	22	24	73	17	12	21	52	49	30	5	19	23	0	52	NA	NA	NA	NA	42	5
ACCN5	3	1	505	PPP:490:492	21	15	28	14	18	31	24	27	15	36	48	37	4	35	22	41	29	7	18	35	3	19	490	0.970297	492	0.974257	19	0
ACCS	0	0	501	NA	28	36	11	27	10	37	24	34	12	13	63	21	13	24	25	38	20	9	21	35	0	25	NA	NA	NA	NA	25	0
ACCSL	0	0	568	NA	31	37	20	30	17	42	26	28	17	28	75	26	13	26	26	40	26	5	24	31	0	26	NA	NA	NA	NA	26	0
ACD	3	1	544	PPP:338:340	52	38	6	20	17	33	27	44	14	7	64	10	9	9	67	59	29	7	5	27	3	64	338	0.621324	340	0.625	52	6
ACE	0	0	1306	NA	105	68	58	67	14	80	75	76	44	47	152	53	30	58	81	78	62	41	56	61	0	81	NA	NA	NA	NA	67	7
ACE2	0	0	805	NA	51	31	54	43	8	56	38	43	16	40	76	47	27	39	37	54	39	23	33	50	0	37	NA	NA	NA	NA	33	2
ACER1	0	0	264	NA	11	13	8	8	5	11	7	11	7	21	32	5	11	20	12	24	11	10	17	20	0	12	NA	NA	NA	NA	12	0
ACER2	0	0	275	NA	23	9	11	8	15	9	5	13	4	19	35	10	8	21	13	17	11	12	10	22	0	13	NA	NA	NA	NA	11	1
ACER3	0	0	267	NA	8	11	8	5	7	11	4	15	7	22	35	11	10	20	12	14	18	11	18	20	0	12	NA	NA	NA	NA	8	2
ACHE	0	0	617	NA	57	43	16	24	8	33	22	61	15	9	80	7	8	29	57	35	27	14	19	53	0	57	NA	NA	NA	NA	45	6
ACIN1	6	4	1341	PPP:415:417 PPP:426:428 PPP:961:963 PPPPPP:1119:1124	82	150	19	65	7	199	72	64	29	31	92	96	14	12	109	152	71	8	8	61	15	94	415	0.309471	1124	0.83818	72	11
ACLY	3	2	1155	PPP:293:295 PPP:871:873	99	54	35	60	16	64	34	112	25	78	95	77	35	44	63	66	65	12	40	81	6	57	293	0.25368	873	0.755844	55	1
ACMSD	0	0	336	NA	20	13	10	18	7	24	11	27	9	12	37	27	14	18	22	13	13	8	8	25	0	22	NA	NA	NA	NA	22	0
ACN9	0	0	125	NA	7	11	5	6	1	11	12	6	3	2	13	9	3	7	6	7	5	1	3	7	0	6	NA	NA	NA	NA	4	1
ACO1	0	0	889	NA	66	41	44	51	9	46	38	71	17	54	80	49	21	44	56	45	44	7	31	75	0	56	NA	NA	NA	NA	48	4
ACO2	0	0	805	NA	62	35	35	47	14	45	30	81	27	58	70	55	11	21	47	43	46	10	23	45	0	47	NA	NA	NA	NA	45	1
ACOT1	0	0	421	NA	37	30	9	17	7	32	9	44	13	15	51	18	7	16	35	15	16	5	14	31	0	35	NA	NA	NA	NA	27	4
ACOT11	0	0	607	NA	48	49	24	32	16	39	27	33	19	24	53	30	16	17	24	48	30	11	15	52	0	24	NA	NA	NA	NA	22	1
ACOT12	0	0	555	NA	45	28	17	31	11	38	17	27	20	39	41	34	10	25	25	45	32	10	10	50	0	25	NA	NA	NA	NA	19	3
ACOT13	0	0	140	NA	13	5	6	4	2	8	3	12	5	9	14	11	7	2	3	7	17	0	1	11	0	3	NA	NA	NA	NA	3	0
ACOT2	0	0	483	NA	41	34	10	17	7	33	15	46	16	17	59	21	10	18	40	26	17	6	15	35	0	40	NA	NA	NA	NA	32	4
ACOT4	0	0	421	NA	37	27	13	16	9	25	15	42	14	27	50	17	6	17	34	21	10	6	13	22	0	34	NA	NA	NA	NA	24	5
ACOT6	0	0	207	NA	16	3	5	9	4	9	11	14	11	14	18	19	5	11	14	15	8	3	5	13	0	14	NA	NA	NA	NA	10	2
ACOT7	0	0	380	NA	30	28	14	14	12	28	16	28	10	18	26	22	11	8	20	26	20	2	8	39	0	20	NA	NA	NA	NA	16	2
ACOT8	3	1	319	PPP:146:148	23	20	4	16	8	16	23	22	14	10	29	12	10	12	26	22	8	7	9	28	3	23	146	0.45768	148	0.46395	21	1
ACOT9	0	0	448	NA	23	27	16	17	8	33	18	25	16	20	45	29	18	25	24	39	21	4	8	32	0	24	NA	NA	NA	NA	22	1
ACOX1	0	0	660	NA	45	31	29	27	9	42	32	43	20	38	70	42	19	25	30	41	41	8	26	42	0	30	NA	NA	NA	NA	30	0
ACOX2	0	0	681	NA	62	44	19	33	14	34	45	38	23	33	80	23	16	26	29	46	42	9	28	37	0	29	NA	NA	NA	NA	29	0
ACOX3	0	0	700	NA	66	41	18	35	13	41	27	50	19	23	92	33	12	36	34	58	23	9	23	47	0	34	NA	NA	NA	NA	30	2
ACOXL	0	0	580	NA	56	40	19	26	10	31	27	37	16	26	65	34	18	28	24	30	31	7	20	35	0	24	NA	NA	NA	NA	24	0
ACP1	0	0	158	NA	12	10	9	12	8	9	8	6	4	10	11	10	2	6	5	11	7	2	5	11	0	5	NA	NA	NA	NA	5	0
ACP2	0	0	423	NA	28	28	15	18	7	25	32	24	11	9	57	11	11	19	31	22	26	8	16	25	0	31	NA	NA	NA	NA	23	4
ACP5	0	0	325	NA	28	20	13	19	3	12	14	23	11	12	35	15	6	17	17	20	17	6	14	23	0	17	NA	NA	NA	NA	17	0
ACP6	0	0	428	NA	25	23	12	22	9	28	27	22	11	16	53	21	15	19	29	25	22	5	16	28	0	29	NA	NA	NA	NA	25	2
ACPL2	0	0	480	NA	26	33	17	19	13	28	18	24	23	17	59	29	12	26	32	34	20	3	20	27	0	32	NA	NA	NA	NA	30	1
ACPP	0	0	418	NA	19	21	11	14	8	30	18	21	14	19	60	20	12	22	26	31	22	8	20	22	0	26	NA	NA	NA	NA	22	2
ACPT	0	0	426	NA	51	31	7	12	7	23	12	39	13	7	71	7	6	15	45	20	16	7	12	25	0	45	NA	NA	NA	NA	35	5
ACR	9	6	421	PPPP:302:305 PPP:309:311 PPP:330:332 PPP:346:348 PPPPPPPP:350:357 PPPPPPPPP:362:370	30	21	16	12	12	15	15	34	10	23	31	20	7	9	62	29	25	11	14	25	30	32	302	0.71734	370	0.87886	24	4
ACRBP	0	0	543	NA	28	27	19	17	20	55	42	29	14	15	53	21	10	21	33	56	35	8	16	24	0	33	NA	NA	NA	NA	33	0
ACRC	0	0	691	NA	39	34	29	122	19	53	16	24	13	24	29	60	5	4	49	92	24	5	10	40	0	49	NA	NA	NA	NA	41	4
ACRV1	0	0	265	NA	14	5	11	4	10	32	21	31	13	8	20	6	8	7	13	39	15	0	4	4	0	13	NA	NA	NA	NA	13	0
ACSBG1	3	1	724	PPP:238:240	56	36	24	34	15	53	38	52	12	43	69	40	25	22	37	41	43	13	29	42	3	34	238	0.328729	240	0.331492	32	1
ACSBG2	0	0	666	NA	40	16	33	24	11	42	30	53	17	51	68	58	22	25	26	39	41	11	20	39	0	26	NA	NA	NA	NA	24	1
ACSF2	0	0	640	NA	49	31	23	22	16	43	32	53	14	37	61	37	22	20	31	37	39	6	20	47	0	31	NA	NA	NA	NA	29	1
ACSF3	0	0	576	NA	44	40	10	18	11	39	17	43	22	23	59	23	12	15	37	36	36	14	17	60	0	37	NA	NA	NA	NA	37	0
ACSL1	0	0	698	NA	50	37	24	36	18	46	25	54	10	37	70	44	21	35	40	32	37	9	20	53	0	40	NA	NA	NA	NA	36	2
ACSL3	0	0	720	NA	45	27	37	25	17	51	20	53	13	49	71	59	20	28	35	49	40	8	29	44	0	35	NA	NA	NA	NA	33	1
ACSL4	0	0	711	NA	43	24	35	30	19	47	19	56	12	52	71	64	22	23	37	40	41	7	29	40	0	37	NA	NA	NA	NA	35	1
ACSL5	0	0	739	NA	48	30	29	42	18	41	29	54	14	45	78	53	13	38	45	45	36	8	23	50	0	45	NA	NA	NA	NA	41	2
ACSL6	0	0	722	NA	49	34	18	35	19	43	34	59	17	43	76	42	18	32	40	40	36	12	23	52	0	40	NA	NA	NA	NA	36	2
ACSM1	0	0	577	NA	31	29	12	28	12	36	22	43	15	35	49	41	13	26	36	40	35	17	17	40	0	36	NA	NA	NA	NA	32	2
ACSM2A	0	0	577	NA	39	25	18	28	11	31	26	45	11	34	58	38	20	16	29	45	31	17	15	40	0	29	NA	NA	NA	NA	27	1
ACSM2B	0	0	577	NA	38	25	17	28	10	31	26	47	11	35	60	39	20	17	28	45	32	17	15	36	0	28	NA	NA	NA	NA	26	1
ACSM3	0	0	586	NA	34	28	29	28	10	32	18	38	15	33	44	47	12	28	33	46	39	15	17	40	0	33	NA	NA	NA	NA	31	1
ACSM4	0	0	580	NA	34	33	17	27	13	35	25	42	8	31	51	39	11	30	36	36	36	17	17	42	0	36	NA	NA	NA	NA	30	3
ACSM5	0	0	579	NA	43	39	18	25	12	37	19	40	12	23	50	30	11	22	40	46	33	17	15	47	0	40	NA	NA	NA	NA	34	3
ACSS1	0	0	689	NA	74	41	12	37	15	38	19	64	18	36	52	31	16	18	39	40	39	13	25	62	0	39	NA	NA	NA	NA	37	1
ACSS2	3	1	714	PPP:31:33	44	37	16	32	19	53	26	63	22	36	54	40	15	30	45	41	44	17	27	53	3	42	31	0.0434174	33	0.0462185	40	1
ACSS3	3	1	686	PPP:470:472	59	30	19	27	11	38	18	68	20	38	55	45	16	19	46	43	35	14	26	59	3	43	470	0.685131	472	0.688047	41	1
ACTA1	0	0	377	NA	29	18	12	22	6	28	11	28	9	30	26	19	17	12	19	23	27	4	16	21	0	19	NA	NA	NA	NA	17	1
ACTA2	0	0	377	NA	29	18	12	21	7	29	11	28	9	30	27	19	16	12	19	26	24	4	16	20	0	19	NA	NA	NA	NA	17	1
ACTB	0	0	375	NA	29	18	9	23	6	26	12	28	9	28	27	19	17	13	19	25	26	4	15	22	0	19	NA	NA	NA	NA	17	1
ACTBL2	0	0	376	NA	27	20	11	22	6	26	12	29	8	30	26	18	17	13	21	23	23	4	16	24	0	21	NA	NA	NA	NA	17	2
ACTC1	0	0	377	NA	29	18	12	22	6	28	11	28	9	30	27	19	16	12	19	24	26	4	16	21	0	19	NA	NA	NA	NA	17	1
ACTG1	0	0	375	NA	29	18	9	20	6	29	12	28	9	29	27	19	17	13	19	25	26	4	15	21	0	19	NA	NA	NA	NA	17	1
ACTG2	0	0	376	NA	29	18	12	20	7	29	10	28	9	30	27	19	16	12	20	25	25	4	16	20	0	20	NA	NA	NA	NA	18	1
ACTL6A	0	0	429	NA	27	19	18	23	9	28	18	38	9	23	31	21	17	16	22	30	27	6	15	32	0	22	NA	NA	NA	NA	18	2
ACTL6B	0	0	426	NA	28	16	16	21	8	31	17	41	10	23	34	25	16	16	26	28	23	6	13	28	0	26	NA	NA	NA	NA	20	3
ACTL7A	0	0	435	NA	26	20	15	18	11	30	20	32	12	18	43	26	13	16	30	27	27	6	15	30	0	30	NA	NA	NA	NA	26	2
ACTL7B	0	0	415	NA	34	18	7	20	13	33	14	37	11	18	44	21	10	13	28	29	24	5	12	24	0	28	NA	NA	NA	NA	26	1
ACTL8	0	0	366	NA	20	25	12	13	7	29	18	25	9	13	39	10	12	16	25	29	17	6	12	29	0	25	NA	NA	NA	NA	23	1
ACTL9	0	0	416	NA	34	24	10	16	7	25	22	31	11	9	52	15	7	16	32	30	23	4	12	36	0	32	NA	NA	NA	NA	26	3
ACTN1	0	0	930	NA	80	57	43	63	10	83	54	43	27	60	88	56	32	33	30	38	55	16	26	36	0	30	NA	NA	NA	NA	24	3
ACTN2	0	0	894	NA	75	60	46	54	10	92	55	35	23	66	84	53	29	28	28	38	43	16	26	33	0	28	NA	NA	NA	NA	24	2
ACTN3	0	0	943	NA	89	73	39	50	17	85	55	46	21	53	96	48	24	31	40	48	46	16	20	46	0	40	NA	NA	NA	NA	34	3
ACTN4	0	0	911	NA	77	51	46	63	8	87	56	41	31	60	84	58	24	30	29	47	41	16	25	37	0	29	NA	NA	NA	NA	25	2
ACTR10	3	1	417	PPP:242:244	23	21	15	16	10	30	12	31	8	28	52	25	9	15	29	25	20	3	13	32	3	26	242	0.580336	244	0.585132	20	3
ACTR1A	0	0	376	NA	24	25	9	21	2	31	10	28	9	28	31	23	9	20	19	28	15	4	15	25	0	19	NA	NA	NA	NA	19	0
ACTR1B	0	0	376	NA	27	23	9	23	2	29	10	28	10	22	34	23	10	19	19	24	18	4	13	29	0	19	NA	NA	NA	NA	19	0
ACTR2	0	0	399	NA	17	25	17	21	5	32	11	32	8	25	41	27	13	16	17	15	22	3	16	36	0	17	NA	NA	NA	NA	13	2
ACTR3	0	0	418	NA	24	25	10	25	8	32	16	31	9	33	26	23	9	21	26	21	23	5	18	33	0	26	NA	NA	NA	NA	22	2
ACTR3B	0	0	418	NA	24	27	10	25	9	32	16	29	9	34	25	21	10	22	27	19	18	5	18	38	0	27	NA	NA	NA	NA	21	3
ACTR3C	0	0	222	NA	23	16	3	6	3	18	9	18	2	16	15	10	2	7	28	11	11	4	7	13	0	28	NA	NA	NA	NA	20	4
ACTR5	0	0	607	NA	45	36	23	29	10	55	41	42	14	24	72	25	15	19	39	40	14	6	22	36	0	39	NA	NA	NA	NA	39	0
ACTR6	0	0	396	NA	14	17	23	25	8	34	16	21	8	33	28	23	10	23	17	23	18	3	21	31	0	17	NA	NA	NA	NA	17	0
ACTR8	0	0	624	NA	37	37	19	36	15	38	40	46	23	38	62	39	18	16	31	43	27	10	18	31	0	31	NA	NA	NA	NA	29	1
ACTRT1	0	0	376	NA	25	15	11	15	10	26	10	29	12	19	41	22	12	18	21	28	17	4	12	29	0	21	NA	NA	NA	NA	21	0
ACTRT2	0	0	377	NA	27	13	8	21	7	27	16	27	10	16	45	22	7	21	23	30	18	6	7	26	0	23	NA	NA	NA	NA	21	1
ACVR1	0	0	509	NA	22	26	23	29	21	26	23	35	12	27	53	29	14	17	23	36	30	9	14	40	0	23	NA	NA	NA	NA	19	2
ACVR1B	0	0	546	NA	38	36	19	27	18	31	17	41	16	32	58	25	17	18	23	35	23	11	20	41	0	23	NA	NA	NA	NA	23	0
ACVR1C	0	0	493	NA	41	26	23	20	24	30	18	28	9	34	49	29	14	11	19	33	26	10	13	36	0	19	NA	NA	NA	NA	19	0
ACVR2A	4	1	513	PPPP:180:183	38	21	20	28	19	38	18	32	14	28	46	32	16	20	30	25	24	11	17	36	4	26	180	0.350877	183	0.356725	20	3
ACVR2B	4	2	512	PPP:128:130 PPPP:178:181	33	28	17	24	19	46	15	37	17	20	57	24	10	17	33	29	24	14	14	34	7	26	128	0.25	181	0.353516	20	3
ACVRL1	0	0	517	NA	31	35	16	24	18	29	23	40	19	20	66	19	11	12	30	35	29	10	11	39	0	30	NA	NA	NA	NA	24	3
ACY1	0	0	408	NA	36	25	11	20	4	31	15	24	15	11	32	15	10	23	29	25	26	9	10	37	0	29	NA	NA	NA	NA	29	0
ACY3	0	0	319	NA	31	19	11	13	5	20	16	21	10	5	33	5	8	20	26	20	20	1	11	24	0	26	NA	NA	NA	NA	26	0
ACYP1	0	0	129	NA	11	7	5	5	1	6	8	15	3	6	14	10	3	6	4	7	5	2	2	9	0	4	NA	NA	NA	NA	4	0
ACYP2	0	0	99	NA	2	6	5	4	1	6	4	8	0	4	3	9	3	4	2	14	7	2	4	11	0	2	NA	NA	NA	NA	2	0
ADA	0	0	363	NA	31	17	13	21	5	30	15	24	11	17	36	24	9	10	21	17	17	4	16	25	0	21	NA	NA	NA	NA	19	1
ADAD1	3	1	576	PPP:178:180	40	21	27	15	10	34	31	30	13	33	62	43	17	20	32	60	24	5	25	34	3	29	178	0.309028	180	0.3125	27	1
ADAD2	3	1	665	PPP:538:540	79	43	9	23	19	30	28	60	13	15	90	24	5	17	70	51	23	14	14	38	3	67	538	0.809023	540	0.81203	47	10
ADAL	0	0	355	NA	17	13	9	23	4	28	19	19	14	21	43	29	6	14	14	26	24	3	9	20	0	14	NA	NA	NA	NA	14	0
ADAM10	3	1	748	PPP:711:713	37	43	35	43	36	44	34	61	29	40	46	49	16	33	40	56	38	6	28	34	3	37	711	0.950535	713	0.953209	33	2
ADAM11	0	0	769	NA	46	51	28	36	44	42	35	92	25	24	73	25	11	23	47	54	38	10	20	45	0	47	NA	NA	NA	NA	35	6
ADAM12	3	1	909	PPP:195:197	66	58	43	41	50	41	40	76	31	33	83	48	18	26	69	57	45	8	20	56	3	66	195	0.214521	197	0.216722	54	6
ADAM15	4	2	863	PPPP:815:818 PPPP:853:856	58	57	21	44	48	38	48	76	23	21	111	17	9	15	97	66	43	13	12	46	8	89	815	0.94438	856	0.991889	69	10
ADAM17	3	1	824	PPP:556:558	38	39	42	65	35	58	33	45	20	35	63	62	15	36	46	64	41	6	26	55	3	43	556	0.674757	558	0.677184	39	2
ADAM18	0	0	739	NA	34	22	51	33	44	36	34	53	20	44	57	47	16	38	30	60	38	5	37	40	0	30	NA	NA	NA	NA	28	1
ADAM19	3	4	955	PPP:169:171 PPP:789:791 PPP:793:795 PPP:834:836	64	66	46	30	51	58	46	88	29	28	79	45	27	26	88	61	50	9	25	39	12	76	169	0.176963	836	0.875393	64	6
ADAM2	0	0	735	NA	34	24	36	37	43	46	34	50	20	50	54	44	16	38	32	65	29	8	29	46	0	32	NA	NA	NA	NA	28	2
ADAM20	3	2	776	PPP:447:449 PPP:726:728	33	25	40	41	46	36	43	58	32	41	70	35	16	34	40	46	41	14	27	58	6	34	447	0.576031	728	0.938144	30	2
ADAM21	0	0	722	NA	33	29	32	33	46	40	35	59	31	42	63	32	14	35	30	51	31	11	24	51	0	30	NA	NA	NA	NA	24	3
ADAM22	0	0	906	NA	38	48	44	54	46	57	31	84	25	51	71	61	15	31	39	76	51	9	29	46	0	39	NA	NA	NA	NA	31	4
ADAM23	0	0	832	NA	50	41	41	42	45	45	41	73	28	38	65	50	14	24	44	67	41	11	29	43	0	44	NA	NA	NA	NA	32	6
ADAM28	0	0	775	NA	38	27	37	49	43	49	33	49	23	34	55	66	24	29	43	47	46	6	28	49	0	43	NA	NA	NA	NA	37	3
ADAM29	3	1	820	PPP:666:668	16	32	36	40	52	43	42	53	37	52	60	51	20	30	60	60	47	11	26	52	3	57	666	0.812195	668	0.814634	37	10
ADAM30	0	0	790	NA	32	38	37	34	44	57	33	61	22	42	73	57	18	31	35	64	30	9	28	45	0	35	NA	NA	NA	NA	31	2
ADAM32	0	0	787	NA	37	31	39	42	43	51	41	48	10	52	61	47	15	30	35	82	39	7	34	43	0	35	NA	NA	NA	NA	33	1
ADAM33	0	0	813	NA	68	54	19	40	50	37	40	89	37	8	95	15	15	19	74	47	35	18	11	42	0	74	NA	NA	NA	NA	66	4
ADAM7	0	0	776	NA	22	28	40	42	44	59	29	54	29	49	67	58	16	33	41	45	43	4	33	40	0	41	NA	NA	NA	NA	39	1
ADAM9	4	1	819	PPPP:790:793	47	45	48	38	44	48	34	75	19	41	59	44	14	33	52	55	33	7	31	52	4	48	790	0.964591	793	0.968254	40	4
ADAMDEC1	0	0	470	NA	21	15	29	20	17	32	19	26	19	27	48	36	10	13	25	35	30	4	15	29	0	25	NA	NA	NA	NA	25	0
ADAMTS1	0	0	967	NA	67	48	33	58	47	56	40	92	27	30	73	58	15	35	61	81	56	15	22	53	0	61	NA	NA	NA	NA	57	2
ADAMTS10	4	2	1103	PPPP:58:61 PPP:214:216	89	82	28	50	66	59	42	94	41	33	87	41	12	29	83	89	59	23	27	69	7	76	58	0.0525839	216	0.19583	56	10
ADAMTS12	3	2	1594	PPP:1023:1025 PPP:1412:1414	66	88	67	66	87	101	76	130	51	65	115	95	30	45	116	135	104	38	36	83	6	110	1023	0.641782	1414	0.887077	98	6
ADAMTS13	0	0	1427	NA	133	110	25	57	82	79	77	145	31	33	127	24	24	32	118	111	72	33	25	89	0	118	NA	NA	NA	NA	100	9
ADAMTS14	0	0	1226	NA	80	78	32	62	59	68	57	117	50	33	97	46	18	33	106	97	61	24	30	78	0	106	NA	NA	NA	NA	94	6
ADAMTS15	0	0	950	NA	73	68	32	51	47	37	32	94	23	25	86	49	11	30	66	76	44	14	28	64	0	66	NA	NA	NA	NA	62	2
ADAMTS16	4	1	1224	PPPP:45:48	82	79	39	45	73	60	48	97	52	35	93	73	26	36	85	113	61	29	37	61	4	81	45	0.0367647	48	0.0392157	69	6
ADAMTS17	3	2	1095	PPP:573:575 PPP:1091:1093	74	83	34	58	66	58	48	94	36	29	95	51	16	22	78	74	58	26	24	71	6	72	573	0.523288	1093	0.998174	62	5
ADAMTS18	0	0	1221	NA	78	62	52	36	77	64	65	105	36	42	89	83	15	46	76	110	53	24	42	66	0	76	NA	NA	NA	NA	66	5
ADAMTS19	5	4	1207	PPPP:105:108 PPPPP:142:146 PPP:148:150 PPP:152:154	78	79	39	55	69	85	52	100	35	54	89	66	28	30	88	92	55	26	28	59	15	73	105	0.0869925	154	0.127589	63	5
ADAMTS2	6	3	1211	PPP:24:26 PPPPPP:29:34 PPP:1108:1110	78	90	41	71	57	76	42	97	51	38	103	50	26	35	91	84	56	18	31	76	12	79	24	0.0198183	1110	0.916598	67	6
ADAMTS20	0	0	1910	NA	75	100	97	90	130	112	97	140	71	81	126	98	35	56	98	172	113	38	71	110	0	98	NA	NA	NA	NA	84	7
ADAMTS3	3	1	1205	PPP:1058:1060	63	74	57	69	56	77	53	86	51	52	81	65	27	34	71	96	62	18	42	71	3	68	1058	0.878008	1060	0.879668	60	4
ADAMTS4	3	1	837	PPP:464:466	69	55	20	42	35	30	38	88	25	19	91	23	14	26	76	60	45	15	19	47	3	73	464	0.554361	466	0.55675	73	0
ADAMTS5	0	0	930	NA	75	60	26	45	42	38	37	92	32	30	77	59	10	27	49	72	56	16	31	56	0	49	NA	NA	NA	NA	41	4
ADAMTS6	3	1	1117	PPP:1018:1020	55	59	55	67	65	65	44	88	39	54	73	58	17	38	61	91	63	25	41	59	3	58	1018	0.91137	1020	0.91316	46	6
ADAMTS7	4	5	1686	PPP:819:821 PPP:1096:1098 PPPP:1141:1144 PPP:1207:1209 PPP:1294:1296	118	120	46	83	84	112	69	153	55	36	138	36	15	40	189	128	88	45	31	100	16	173	819	0.485765	1296	0.768683	151	11
ADAMTS8	4	1	918	PPPP:230:233	87	65	28	43	42	55	42	99	27	24	81	33	10	25	79	60	42	14	17	45	4	75	230	0.250545	233	0.253813	69	3
ADAMTS9	3	1	1935	PPP:1167:1169	99	136	87	106	129	112	90	154	60	66	107	100	26	50	108	159	126	40	66	114	3	105	1167	0.603101	1169	0.604134	101	2
ADAMTSL1	0	0	1762	NA	119	107	55	72	105	99	95	130	47	62	159	80	17	42	119	152	117	36	35	114	0	119	NA	NA	NA	NA	109	5
ADAMTSL2	0	0	1060	NA	67	72	38	58	63	66	42	104	24	20	71	44	15	29	72	86	68	25	30	66	0	72	NA	NA	NA	NA	58	7
ADAMTSL3	3	1	1691	PPP:1421:1423	95	106	66	72	104	105	97	121	50	70	121	88	30	41	118	126	104	37	39	101	3	115	1421	0.840331	1423	0.841514	99	8
ADAMTSL4	3	1	1097	PPP:625:627	65	103	20	26	59	62	75	115	25	23	83	10	7	22	155	106	55	25	18	43	3	152	625	0.569736	627	0.571559	114	19
ADAMTSL5	0	0	481	NA	41	45	11	19	23	21	26	49	20	5	51	3	4	14	47	23	20	13	15	31	0	47	NA	NA	NA	NA	39	4
ADAP1	0	0	385	NA	31	30	11	19	6	30	16	25	14	14	24	28	8	28	22	19	14	9	17	20	0	22	NA	NA	NA	NA	20	1
ADAP2	0	0	381	NA	24	35	17	18	8	30	14	26	8	15	41	29	5	22	19	18	15	8	13	16	0	19	NA	NA	NA	NA	19	0
ADAR	0	0	1269	NA	84	74	49	55	23	93	58	96	31	51	110	91	27	47	89	115	65	13	33	65	0	89	NA	NA	NA	NA	75	7
ADARB1	3	1	741	PPP:229:231	52	41	34	35	7	39	31	63	19	29	74	45	12	30	54	76	37	6	16	41	3	51	229	0.309042	231	0.311741	41	5
ADARB2	3	1	739	PPP:82:84	69	67	16	26	12	35	33	69	25	15	81	37	13	25	48	58	41	7	12	50	3	45	82	0.110961	84	0.113667	39	3
ADAT1	0	0	502	NA	43	30	12	23	14	27	30	37	13	23	40	36	9	16	32	42	23	9	10	33	0	32	NA	NA	NA	NA	30	1
ADAT2	0	0	191	NA	21	8	11	3	9	21	7	11	3	5	10	15	9	4	11	10	8	2	5	18	0	11	NA	NA	NA	NA	11	0
ADAT3	0	0	351	NA	51	33	2	19	10	19	14	23	11	2	39	7	7	11	37	17	11	4	6	28	0	37	NA	NA	NA	NA	35	1
ADC	3	1	480	PPP:309:311	46	12	10	22	19	31	15	38	15	24	46	25	12	22	28	37	20	6	12	40	3	25	309	0.64375	311	0.647917	23	1
ADCK1	0	0	523	NA	40	35	22	26	10	30	21	25	19	23	72	29	15	22	18	35	21	8	16	36	0	18	NA	NA	NA	NA	18	0
ADCK2	0	0	626	NA	52	42	16	21	13	34	25	44	17	19	98	24	12	28	39	42	24	8	9	59	0	39	NA	NA	NA	NA	33	3
ADCK3	3	1	647	PPP:601:603	69	41	21	30	9	49	32	47	21	28	62	33	20	40	35	40	21	2	14	33	3	32	601	0.928903	603	0.931994	30	1
ADCK4	3	1	544	PPP:480:482	56	43	9	29	13	32	38	50	11	16	63	17	10	26	29	32	21	10	9	30	3	26	480	0.882353	482	0.886029	26	0
ADCK5	0	0	580	NA	62	54	12	27	8	37	21	35	20	14	83	20	16	25	26	24	16	11	17	52	0	26	NA	NA	NA	NA	20	3
ADCY1	0	0	1119	NA	94	74	35	40	34	60	38	90	26	51	151	44	27	50	50	63	58	8	34	92	0	50	NA	NA	NA	NA	44	3
ADCY10	3	2	1610	PPP:220:222 PPP:1195:1197	81	67	81	61	45	119	72	72	52	116	192	109	65	91	52	93	67	20	69	86	6	46	220	0.136646	1197	0.743478	44	1
ADCY2	0	0	1091	NA	71	51	49	40	29	61	41	64	33	79	127	59	38	61	34	72	54	14	36	78	0	34	NA	NA	NA	NA	32	1
ADCY3	0	0	1144	NA	81	61	50	53	21	75	43	65	23	55	127	56	44	56	43	82	58	13	40	98	0	43	NA	NA	NA	NA	43	0
ADCY4	3	1	1077	PPP:9:11	89	57	30	38	26	61	35	73	28	40	170	42	28	54	51	86	54	16	35	64	3	48	9	0.00835655	11	0.0102136	44	2
ADCY5	0	0	1261	NA	123	74	53	55	34	75	54	96	32	61	129	53	36	57	48	87	50	11	36	97	0	48	NA	NA	NA	NA	36	6
ADCY6	0	0	1168	NA	110	82	42	50	31	63	50	78	30	58	141	43	37	55	43	71	54	13	36	81	0	43	NA	NA	NA	NA	37	3
ADCY7	4	1	1080	PPPP:460:463	81	63	36	43	41	57	36	75	31	51	138	50	29	47	48	67	55	13	33	86	4	44	460	0.425926	463	0.428704	44	0
ADCY8	0	0	1251	NA	73	74	54	57	23	75	49	94	39	81	160	49	28	57	46	97	63	12	40	80	0	46	NA	NA	NA	NA	42	2
ADCY9	4	1	1353	PPPP:815:818	91	68	46	64	39	81	53	87	38	60	143	75	31	68	58	129	67	15	40	100	4	54	815	0.602365	818	0.604582	48	3
ADCYAP1	0	0	315	NA	40	29	5	12	3	12	11	29	5	7	36	13	5	6	27	34	12	1	11	17	0	27	NA	NA	NA	NA	19	4
ADCYAP1R1	0	0	524	NA	26	22	19	24	19	26	16	30	13	27	53	21	17	35	24	46	28	14	20	44	0	24	NA	NA	NA	NA	24	0
ADD1	3	2	768	PPP:13:15 PPP:641:643	57	35	32	38	10	66	31	50	17	26	64	53	16	20	67	66	42	5	21	52	6	61	13	0.0169271	643	0.83724	55	3
ADD2	4	1	726	PPPP:12:15	50	34	24	33	8	73	36	36	15	23	56	57	23	21	48	72	48	6	15	48	4	44	12	0.0165289	15	0.0206612	44	0
ADD3	4	1	706	PPPP:13:16	38	33	32	36	6	60	37	40	18	41	58	51	18	22	46	61	39	4	20	46	4	42	13	0.0184136	16	0.0226629	34	4
ADH1A	0	0	375	NA	31	9	11	17	16	20	7	36	8	26	29	32	11	15	20	23	22	2	4	36	0	20	NA	NA	NA	NA	16	2
ADH1B	0	0	375	NA	31	10	12	17	15	19	6	38	8	22	29	32	8	16	20	21	24	2	6	39	0	20	NA	NA	NA	NA	16	2
ADH1C	0	0	374	NA	30	11	12	16	15	21	6	36	6	24	29	33	8	17	20	24	22	2	4	38	0	20	NA	NA	NA	NA	16	2
ADH4	0	0	399	NA	35	10	14	20	17	18	8	38	8	31	34	32	5	21	18	25	28	3	6	28	0	18	NA	NA	NA	NA	16	1
ADH5	0	0	374	NA	34	9	9	14	15	26	6	40	7	28	22	32	8	14	16	21	23	4	7	39	0	16	NA	NA	NA	NA	14	1
ADH6	0	0	375	NA	30	7	11	13	19	22	11	38	5	26	36	32	7	17	14	24	23	2	5	33	0	14	NA	NA	NA	NA	12	1
ADH7	0	0	394	NA	22	14	9	19	15	23	6	38	8	26	27	32	12	18	19	25	33	2	5	41	0	19	NA	NA	NA	NA	13	3
ADHFE1	0	0	467	NA	56	19	13	27	8	16	11	31	16	20	45	25	15	16	32	33	29	1	18	36	0	32	NA	NA	NA	NA	30	1
ADI1	0	0	179	NA	10	15	5	18	1	15	6	10	5	10	13	12	7	7	11	2	6	5	12	9	0	11	NA	NA	NA	NA	11	0
ADIG	0	0	192	NA	10	10	4	6	6	11	10	18	5	5	23	9	3	8	15	21	6	10	1	11	0	15	NA	NA	NA	NA	13	1
ADIPOQ	0	0	244	NA	12	7	11	15	2	12	10	39	8	9	23	12	5	10	17	7	15	2	14	14	0	17	NA	NA	NA	NA	17	0
ADIPOR1	0	0	375	NA	26	17	7	10	7	24	12	29	14	18	40	14	13	30	21	20	18	9	14	32	0	21	NA	NA	NA	NA	17	2
ADIPOR2	0	0	386	NA	22	18	8	15	12	23	11	33	20	27	41	11	12	32	20	27	11	9	12	22	0	20	NA	NA	NA	NA	18	1
ADK	0	0	362	NA	39	12	15	21	7	29	16	19	10	25	27	34	8	21	14	16	19	2	9	19	0	14	NA	NA	NA	NA	14	0
ADM	0	0	185	NA	19	20	4	9	2	4	9	15	3	4	15	13	5	7	14	20	7	2	5	8	0	14	NA	NA	NA	NA	12	1
ADM2	0	0	232	NA	31	19	2	4	10	15	9	18	7	3	18	7	4	1	31	16	17	7	2	11	0	31	NA	NA	NA	NA	29	1
ADNP	3	1	1102	PPP:435:437	65	39	60	62	24	79	54	54	38	37	84	99	24	36	72	119	48	12	34	62	3	69	435	0.394737	437	0.396552	63	3
ADNP2	3	1	1131	PPP:210:212	70	41	44	31	27	49	56	79	43	42	110	75	22	36	114	96	56	6	26	108	3	111	210	0.185676	212	0.187445	93	9
ADO	0	0	270	NA	22	21	5	18	6	17	11	22	7	9	29	8	7	8	34	15	10	2	8	11	0	34	NA	NA	NA	NA	24	5
ADORA1	0	0	326	NA	32	12	12	9	9	11	8	12	5	31	41	15	9	19	22	18	10	7	12	32	0	22	NA	NA	NA	NA	16	3
ADORA2A	0	0	412	NA	42	19	18	9	15	15	16	34	11	29	50	9	8	20	24	26	14	7	11	35	0	24	NA	NA	NA	NA	20	2
ADORA2B	0	0	332	NA	36	12	16	9	14	7	11	19	5	19	45	10	8	19	13	17	20	5	12	35	0	13	NA	NA	NA	NA	11	1
ADORA3	0	0	347	NA	22	21	16	17	13	6	6	16	6	31	41	17	12	17	12	25	26	5	10	28	0	12	NA	NA	NA	NA	12	0
ADPGK	0	0	496	NA	48	23	15	20	6	33	16	39	23	20	59	14	10	23	28	44	16	9	6	44	0	28	NA	NA	NA	NA	24	2
ADPRH	0	0	357	NA	38	15	9	18	4	22	13	38	14	10	36	18	12	12	14	26	13	10	19	16	0	14	NA	NA	NA	NA	12	1
ADPRHL1	0	0	354	NA	32	21	10	17	10	35	8	30	10	12	38	21	10	12	14	16	19	9	16	14	0	14	NA	NA	NA	NA	14	0
ADPRHL2	0	0	363	NA	48	19	6	21	6	26	18	34	8	11	37	12	10	13	12	31	15	1	14	21	0	12	NA	NA	NA	NA	12	0
ADRA1A	0	0	475	NA	35	27	12	13	20	14	14	33	11	33	49	23	10	24	25	48	25	7	14	38	0	25	NA	NA	NA	NA	21	2
ADRA1B	3	1	520	PPP:436:438	42	35	20	17	16	19	8	43	7	27	62	24	7	27	38	47	27	9	14	31	3	35	436	0.838462	438	0.842308	31	2
ADRA1D	0	0	572	NA	70	45	9	16	17	26	10	63	9	15	54	16	8	27	36	49	22	9	12	59	0	36	NA	NA	NA	NA	28	4
ADRA2A	0	0	465	NA	46	38	13	13	11	21	12	45	3	30	38	17	5	26	41	30	23	9	12	32	0	41	NA	NA	NA	NA	33	4
ADRA2B	0	0	447	NA	47	32	11	10	14	25	21	32	6	29	47	14	2	23	31	32	19	12	13	27	0	31	NA	NA	NA	NA	25	3
ADRA2C	3	1	462	PPP:278:280	66	46	12	10	12	15	11	47	3	16	40	8	5	27	26	39	15	8	15	41	3	23	278	0.601732	280	0.606061	19	2
ADRB1	3	2	477	PPP:285:287 PPP:420:422	66	37	11	20	16	15	8	31	4	18	53	11	8	22	47	36	18	10	9	37	6	41	285	0.597484	422	0.884696	31	5
ADRB2	0	0	413	NA	25	17	22	16	13	19	19	28	11	31	39	16	10	25	12	29	23	8	14	36	0	12	NA	NA	NA	NA	12	0
ADRB3	0	0	408	NA	59	31	12	7	16	11	6	26	4	6	60	1	7	15	43	27	22	12	7	36	0	43	NA	NA	NA	NA	33	5
ADRBK1	3	1	689	PPP:467:469	39	44	18	40	14	60	32	41	21	31	76	54	24	36	31	41	22	7	22	36	3	28	467	0.677794	469	0.680697	24	2
ADRBK2	3	1	688	PPP:467:469	34	38	24	38	18	59	31	40	24	34	72	60	21	38	27	39	27	7	23	34	3	24	467	0.678779	469	0.681686	22	1
ADRM1	0	0	407	NA	43	11	13	20	5	21	24	42	4	10	42	19	12	12	34	49	23	2	5	16	0	34	NA	NA	NA	NA	30	2
ADSL	0	0	498	NA	39	35	12	28	14	33	28	26	13	26	53	26	16	20	19	37	26	5	11	31	0	19	NA	NA	NA	NA	19	0
ADSS	0	0	456	NA	32	21	21	24	7	30	20	50	8	29	39	29	8	19	21	16	22	5	15	40	0	21	NA	NA	NA	NA	17	2
ADSSL1	0	0	500	NA	34	31	18	19	7	28	21	60	16	24	47	26	8	18	28	26	32	8	12	37	0	28	NA	NA	NA	NA	20	4
AEBP1	4	4	1158	PPPP:57:60 PPPP:184:187 PPP:258:260 PPPP:320:323	73	74	41	58	13	138	39	80	22	42	82	69	22	34	126	48	83	21	37	56	15	111	57	0.0492228	323	0.278929	79	16
AEBP2	0	0	517	NA	34	27	14	29	9	50	16	66	14	15	36	28	12	10	26	79	20	5	5	22	0	26	NA	NA	NA	NA	22	2
AEN	0	0	327	NA	28	26	5	13	8	20	22	20	11	8	29	20	9	6	24	29	16	4	9	20	0	24	NA	NA	NA	NA	22	1
AES	0	0	264	NA	25	16	7	11	5	15	24	21	12	8	31	16	5	6	14	21	11	1	6	9	0	14	NA	NA	NA	NA	12	1
AFAP1	4	3	814	PPP:81:83 PPPP:260:263 PPP:541:543	57	40	27	38	16	70	32	51	15	31	77	81	8	11	58	83	42	9	23	45	10	48	81	0.0995086	543	0.667076	42	3
AFAP1L1	3	2	768	PPP:114:116 PPP:121:123	53	55	20	41	19	78	33	41	18	20	82	58	11	12	47	74	27	8	24	47	6	41	114	0.148438	123	0.160156	41	0
AFAP1L2	3	1	871	PPP:101:103	54	40	27	50	16	90	41	45	15	27	94	72	10	11	61	87	48	12	23	48	3	58	101	0.115959	103	0.118255	52	3
AFF1	4	5	1218	PPP:282:284 PPP:375:377 PPP:569:571 PPP:763:765 PPPP:873:876	80	59	32	57	14	83	69	52	36	28	78	112	20	24	136	198	71	4	16	49	16	120	282	0.231527	876	0.719212	90	15
AFF2	3	4	1311	PPP:137:139 PPP:474:476 PPP:559:561 PPP:914:916	87	53	77	58	15	93	57	51	30	50	101	103	29	38	123	140	115	13	21	57	12	111	137	0.1045	916	0.698703	91	10
AFF3	3	1	1251	PPP:588:590	104	69	62	63	20	88	63	62	30	32	84	88	23	23	103	185	61	12	24	55	3	100	588	0.470024	590	0.471623	82	9
AFF4	3	2	1163	PPP:328:330 PPP:466:468	61	55	53	59	7	86	53	59	32	26	65	122	21	22	95	219	60	7	26	35	6	89	328	0.282029	468	0.402408	77	6
AFG3L2	0	0	812	NA	58	59	27	43	7	62	26	80	7	38	80	62	13	40	43	40	43	9	19	56	0	43	NA	NA	NA	NA	33	5
AFM	3	1	599	PPP:521:523	28	24	33	33	34	55	27	16	13	28	55	51	9	43	28	35	34	0	17	36	3	25	521	0.869783	523	0.873122	21	2
AFMID	0	0	308	NA	23	12	7	15	4	20	20	21	10	11	27	14	7	17	16	20	16	6	10	32	0	16	NA	NA	NA	NA	16	0
AFP	0	0	622	NA	48	24	22	24	33	61	40	25	16	35	63	41	9	35	21	39	37	2	17	30	0	21	NA	NA	NA	NA	19	1
AFTPH	3	1	937	PPP:13:15	51	26	46	81	14	85	37	59	19	36	74	51	15	45	52	112	70	7	6	51	3	49	13	0.0138741	15	0.0160085	43	3
AGA	0	0	346	NA	35	15	14	20	11	17	11	32	9	20	23	16	10	13	19	22	25	4	8	22	0	19	NA	NA	NA	NA	17	1
AGAP1	3	1	1069	PPP:730:732	93	93	41	52	19	74	36	82	22	37	92	49	13	21	72	124	59	14	22	54	3	69	730	0.682881	732	0.684752	59	5
AGAP10	3	1	703	PPP:436:438	39	30	30	33	19	47	30	46	19	34	63	53	22	18	33	78	50	14	11	34	3	30	436	0.620199	438	0.623044	26	2
AGAP2	5	5	1192	PPPPP:28:32 PPPP:182:185 PPP:290:292 PPP:787:789 PPP:824:826	136	87	22	41	14	59	38	119	23	33	115	59	10	20	112	149	72	16	14	53	18	94	28	0.0234899	826	0.692953	72	11
AGAP3	3	1	911	PPP:571:573	89	58	32	38	17	54	48	80	22	37	85	38	9	21	60	96	41	12	19	55	3	57	571	0.626784	573	0.628979	49	4
AGAP4	3	1	663	PPP:368:370	44	31	29	30	20	41	34	37	20	34	56	39	17	12	34	79	48	11	13	34	3	31	368	0.555053	370	0.558069	29	1
AGAP5	3	1	686	PPP:391:393	48	31	32	30	20	45	35	37	22	35	57	36	16	14	35	86	49	11	14	33	3	32	391	0.569971	393	0.572886	30	1
AGAP6	3	1	686	PPP:391:393	47	31	32	30	21	46	36	35	21	34	58	37	18	14	36	83	49	11	13	34	3	33	391	0.569971	393	0.572886	31	1
AGAP7	3	1	663	PPP:368:370	44	31	28	31	20	44	33	36	21	35	57	36	16	12	34	77	49	11	14	34	3	31	368	0.555053	370	0.558069	29	1
AGAP8	3	1	663	PPP:368:370	44	29	29	30	20	43	34	37	21	34	56	37	17	12	34	80	47	12	13	34	3	31	368	0.555053	370	0.558069	29	1
AGAP9	3	1	703	PPP:436:438	39	31	30	33	19	47	30	46	19	34	62	53	22	18	33	78	50	14	11	34	3	30	436	0.620199	438	0.623044	26	2
AGBL1	3	1	1062	PPP:494:496	74	59	42	54	29	62	49	53	37	44	120	54	25	43	53	89	58	12	39	66	3	50	494	0.46516	496	0.467043	46	2
AGBL2	4	1	904	PPPP:114:117	37	52	53	45	20	50	46	45	24	36	96	70	20	42	57	66	55	14	39	37	4	53	114	0.126106	117	0.129425	51	1
AGBL3	0	0	975	NA	34	60	48	52	21	51	45	48	34	42	84	76	22	41	50	82	73	16	46	50	0	50	NA	NA	NA	NA	50	0
AGBL4	0	0	533	NA	22	36	30	30	11	25	20	32	15	24	40	30	14	33	34	41	24	5	33	34	0	34	NA	NA	NA	NA	30	2
AGBL5	5	1	886	PPPPP:540:544	53	72	40	33	21	44	32	69	27	24	77	30	18	40	82	110	42	8	22	42	5	77	540	0.609481	544	0.613995	65	6
AGER	0	0	435	NA	38	29	10	8	6	39	20	54	6	16	38	15	5	5	44	29	25	9	4	35	0	44	NA	NA	NA	NA	38	3
AGFG1	0	0	584	NA	74	12	28	20	6	13	40	44	12	7	26	26	9	47	44	88	47	2	7	32	0	44	NA	NA	NA	NA	40	2
AGFG2	3	1	481	PPP:212:214	51	16	11	12	7	12	30	59	4	6	30	17	8	31	63	58	31	3	4	28	3	60	212	0.440748	214	0.444906	46	7
AGGF1	4	1	714	PPPP:12:15	32	35	34	51	7	77	35	41	21	30	47	63	8	18	40	62	47	5	25	36	4	36	12	0.0168067	15	0.0210084	30	3
AGK	0	0	422	NA	28	20	13	17	8	30	22	28	9	23	43	30	6	17	26	25	35	8	8	26	0	26	NA	NA	NA	NA	22	2
AGL	0	0	1532	NA	94	84	82	75	38	108	56	96	45	91	148	83	33	66	85	90	71	31	63	93	0	85	NA	NA	NA	NA	85	0
AGMAT	0	0	352	NA	31	25	10	19	10	14	14	37	6	15	38	9	11	9	30	19	19	1	9	26	0	30	NA	NA	NA	NA	26	2
AGMO	0	0	445	NA	22	16	14	11	4	23	15	22	16	30	53	19	11	36	26	38	27	15	19	28	0	26	NA	NA	NA	NA	22	2
AGPAT1	0	0	283	NA	19	19	6	11	6	9	9	24	7	12	38	11	11	15	19	15	10	7	8	27	0	19	NA	NA	NA	NA	15	2
AGPAT2	0	0	278	NA	25	18	8	7	7	13	11	18	4	11	34	10	10	16	13	17	16	3	9	28	0	13	NA	NA	NA	NA	13	0
AGPAT3	0	0	376	NA	21	20	10	10	10	26	11	26	6	13	56	25	7	27	13	18	21	12	14	30	0	13	NA	NA	NA	NA	13	0
AGPAT4	0	0	378	NA	18	21	14	15	10	21	11	20	9	21	48	24	8	25	15	25	20	12	16	25	0	15	NA	NA	NA	NA	13	1
AGPAT5	0	0	364	NA	23	21	11	17	6	19	12	21	10	20	45	26	12	14	16	17	19	7	22	26	0	16	NA	NA	NA	NA	16	0
AGPAT6	0	0	456	NA	26	28	16	19	8	25	10	30	10	33	50	30	17	24	16	29	24	8	18	35	0	16	NA	NA	NA	NA	14	1
AGPAT9	0	0	434	NA	20	20	15	14	9	26	13	35	9	35	47	30	16	16	15	32	24	10	12	36	0	15	NA	NA	NA	NA	13	1
AGPHD1	0	0	373	NA	23	9	16	13	5	27	15	21	13	21	39	27	12	16	15	37	16	3	18	27	0	15	NA	NA	NA	NA	15	0
AGPS	0	0	658	NA	53	38	27	33	14	45	23	59	17	39	52	39	12	29	29	41	39	8	22	39	0	29	NA	NA	NA	NA	27	1
AGR2	0	0	195	NA	15	8	6	12	1	12	8	5	4	9	26	19	5	5	10	14	15	2	9	10	0	10	NA	NA	NA	NA	10	0
AGR3	0	0	166	NA	10	8	7	8	2	11	10	6	4	10	23	12	8	4	8	10	8	2	7	8	0	8	NA	NA	NA	NA	6	1
AGRN	3	2	2045	PPP:626:628 PPP:1018:1020	193	148	43	98	143	117	85	229	40	26	175	44	13	57	182	146	118	14	29	145	6	176	626	0.306112	1020	0.498778	154	11
AGRP	0	0	132	NA	17	12	2	5	11	9	8	7	1	1	21	3	4	3	10	5	7	0	2	4	0	10	NA	NA	NA	NA	10	0
AGT	0	0	485	NA	50	17	15	25	5	22	30	28	14	14	69	21	12	22	25	32	31	7	8	38	0	25	NA	NA	NA	NA	25	0
AGTPBP1	3	1	1238	PPP:668:670	71	62	71	74	24	85	48	73	30	70	118	75	27	35	66	99	70	8	49	83	3	63	668	0.53958	670	0.541195	59	2
AGTR1	0	0	359	NA	23	13	18	12	10	7	6	12	6	41	46	23	9	28	17	25	20	5	17	21	0	17	NA	NA	NA	NA	15	1
AGTR2	0	0	363	NA	24	15	18	9	14	7	10	17	4	31	42	17	11	28	16	29	19	8	16	28	0	16	NA	NA	NA	NA	14	1
AGTRAP	0	0	159	NA	15	8	2	8	3	5	4	15	4	11	21	2	4	9	6	13	8	4	6	11	0	6	NA	NA	NA	NA	6	0
AGXT	0	0	392	NA	29	19	10	19	6	17	17	37	13	22	53	21	11	10	25	25	17	5	13	23	0	25	NA	NA	NA	NA	19	3
AGXT2	0	0	514	NA	34	26	14	17	17	32	21	42	21	27	47	26	19	28	31	31	28	5	11	37	0	31	NA	NA	NA	NA	27	2
AGXT2L1	0	0	499	NA	38	23	19	29	11	33	16	37	21	29	39	43	14	20	19	29	27	1	17	34	0	19	NA	NA	NA	NA	15	2
AGXT2L2	0	0	450	NA	43	24	16	25	8	25	26	33	17	20	40	20	7	20	24	25	16	2	16	43	0	24	NA	NA	NA	NA	20	2
AHCTF1	3	2	2301	PPP:499:501 PPP:2248:2250	127	123	95	106	36	186	115	111	41	103	243	149	34	66	133	252	143	23	46	169	6	127	499	0.216862	2250	0.977836	117	5
AHCY	0	0	432	NA	39	17	20	26	10	27	13	37	11	32	38	29	16	11	16	14	24	6	15	31	0	16	NA	NA	NA	NA	16	0
AHCYL1	0	0	530	NA	43	25	22	32	19	33	23	33	8	27	42	38	14	15	18	36	33	8	18	43	0	18	NA	NA	NA	NA	18	0
AHCYL2	0	0	611	NA	61	30	22	33	18	38	27	44	12	27	47	41	16	14	34	43	33	8	17	46	0	34	NA	NA	NA	NA	30	2
AHDC1	10	6	1603	PPP:63:65 PPP:158:160 PPPPPPPPPP:429:438 PPP:949:951 PPP:1022:1024 PPP:1414:1416	168	104	28	69	30	73	63	162	31	14	140	73	18	54	223	175	70	9	37	62	25	198	63	0.0393013	1416	0.883344	150	24
AHI1	0	0	1196	NA	49	57	54	73	20	101	49	51	45	69	85	109	26	44	65	100	77	13	37	72	0	65	NA	NA	NA	NA	57	4
AHNAK	0	0	5890	NA	211	44	146	608	9	348	68	641	99	288	401	827	256	152	718	323	104	32	10	605	0	718	NA	NA	NA	NA	718	0
AHNAK2	0	0	5795	NA	436	141	22	476	20	420	258	466	73	120	527	598	195	149	572	543	223	19	13	524	0	572	NA	NA	NA	NA	530	21
AHR	0	0	848	NA	41	35	55	43	18	47	70	42	25	38	81	40	23	44	58	68	53	5	27	35	0	58	NA	NA	NA	NA	52	3
AHRR	3	1	719	PPP:189:191	63	59	7	34	25	32	40	57	22	13	73	27	19	21	79	60	35	7	11	35	3	76	189	0.262865	191	0.265647	56	10
AHSA1	0	0	338	NA	20	15	14	14	3	37	11	26	6	15	24	27	8	15	16	17	29	10	7	24	0	16	NA	NA	NA	NA	16	0
AHSA2	0	0	300	NA	15	10	15	9	4	31	12	24	5	16	31	31	9	10	8	15	21	9	4	21	0	8	NA	NA	NA	NA	8	0
AHSG	0	0	433	NA	43	14	16	19	17	23	25	28	18	9	42	17	4	14	43	31	19	5	8	38	0	43	NA	NA	NA	NA	27	8
AHSP	3	1	102	PPP:98:100	6	4	7	6	0	9	7	2	2	2	14	6	3	5	7	7	3	1	4	7	3	4	98	0.960784	100	0.980392	4	0
AICDA	0	0	198	NA	10	26	9	13	7	10	3	9	5	5	25	8	3	14	5	10	9	6	11	10	0	5	NA	NA	NA	NA	5	0
AIDA	0	0	306	NA	18	14	7	16	3	32	16	16	8	18	34	30	4	16	19	14	19	2	7	13	0	19	NA	NA	NA	NA	19	0
AIF1	0	0	161	NA	8	8	3	10	0	19	4	17	1	7	20	21	7	6	9	11	4	0	4	2	0	9	NA	NA	NA	NA	7	1
AIF1L	3	1	176	PPP:166:168	9	11	7	7	4	18	7	12	2	6	21	15	11	8	9	14	4	0	4	7	3	6	166	0.943182	168	0.954545	6	0
AIFM1	0	0	613	NA	52	39	21	29	5	42	22	59	10	35	52	41	12	20	32	43	27	8	13	51	0	32	NA	NA	NA	NA	26	3
AIFM2	0	0	373	NA	33	19	15	11	2	22	20	32	8	18	38	20	10	15	12	31	16	1	10	40	0	12	NA	NA	NA	NA	10	1
AIFM3	0	0	605	NA	48	39	17	22	11	46	20	54	14	17	53	45	15	26	28	37	26	6	15	66	0	28	NA	NA	NA	NA	28	0
AIG1	0	0	245	NA	10	8	7	7	6	7	9	16	8	21	30	9	11	15	12	17	13	9	12	18	0	12	NA	NA	NA	NA	10	1
AIM1	3	1	1723	PPP:98:100	95	75	74	89	27	138	69	124	35	68	132	116	36	63	133	198	94	17	31	109	3	130	98	0.0568775	100	0.0580383	112	9
AIM1L	0	0	787	NA	40	39	11	32	14	65	36	86	21	25	86	31	10	29	52	73	30	24	21	62	0	52	NA	NA	NA	NA	50	1
AIM2	0	0	343	NA	24	15	16	13	2	25	19	14	5	21	30	45	10	19	12	17	24	0	5	27	0	12	NA	NA	NA	NA	12	0
AIMP1	0	0	336	NA	26	13	13	14	6	31	19	20	4	24	28	38	10	6	19	20	13	1	3	28	0	19	NA	NA	NA	NA	17	1
AIMP2	0	0	320	NA	24	12	18	14	6	15	17	20	8	14	40	20	8	10	19	23	16	5	7	24	0	19	NA	NA	NA	NA	17	1
AIP	0	0	330	NA	31	19	8	23	8	28	22	18	12	18	32	24	8	9	15	11	9	4	11	20	0	15	NA	NA	NA	NA	15	0
AIPL1	3	1	384	PPP:374:376	28	21	13	12	7	44	19	18	16	17	41	21	12	8	29	18	20	7	11	22	3	26	374	0.973958	376	0.979167	14	6
AIRE	3	1	545	PPP:124:126	64	36	5	27	18	32	26	48	15	11	56	24	5	14	64	41	22	5	4	28	3	61	124	0.227523	126	0.231193	47	7
AJAP1	0	0	411	NA	36	32	11	10	7	21	20	27	9	18	33	10	7	12	39	47	39	8	4	21	0	39	NA	NA	NA	NA	29	5
AK1	0	0	210	NA	9	16	3	12	4	19	8	20	2	9	19	19	5	5	7	15	14	0	7	17	0	7	NA	NA	NA	NA	7	0
AK2	0	0	239	NA	21	15	5	15	4	18	5	15	5	15	25	19	9	8	17	14	12	0	5	12	0	17	NA	NA	NA	NA	13	2
AK3	0	0	227	NA	15	14	7	13	0	13	11	15	4	14	25	16	4	7	14	11	18	3	8	15	0	14	NA	NA	NA	NA	12	1
AK4	0	0	223	NA	12	14	8	11	2	15	11	15	8	14	24	14	4	7	14	14	10	3	7	16	0	14	NA	NA	NA	NA	8	3
AK5	0	0	562	NA	29	35	17	42	10	50	26	40	4	40	55	37	14	23	28	36	32	2	16	26	0	28	NA	NA	NA	NA	24	2
AK7	0	0	723	NA	57	35	34	43	9	100	25	32	15	51	67	48	17	28	29	34	27	6	21	45	0	29	NA	NA	NA	NA	27	1
AK8	3	1	479	PPP:408:410	25	29	21	25	6	34	31	20	13	36	62	20	13	14	38	19	25	4	16	28	3	35	408	0.851775	410	0.85595	29	3
AKAP1	3	1	945	PPP:472:474	77	40	23	50	18	78	40	68	18	33	93	44	13	19	78	99	51	11	16	76	3	75	472	0.499471	474	0.501587	59	8
AKAP10	0	0	662	NA	52	28	22	36	8	46	37	31	20	31	58	42	20	31	31	80	37	6	16	30	0	31	NA	NA	NA	NA	29	1
AKAP11	0	0	1901	NA	121	51	88	117	45	157	89	71	57	74	169	145	31	77	90	245	111	7	42	114	0	90	NA	NA	NA	NA	82	4
AKAP12	3	1	1782	PPP:1396:1398	157	40	20	98	10	316	104	122	23	42	89	148	20	24	114	171	137	8	3	136	3	111	1396	0.783389	1398	0.784512	97	7
AKAP13	3	1	2817	PPP:954:956	188	123	97	174	54	262	153	178	65	93	252	191	61	74	161	323	159	13	31	165	3	158	954	0.338658	956	0.339368	144	7
AKAP14	0	0	197	NA	13	7	10	11	2	15	8	6	6	9	11	17	7	10	8	14	12	4	9	18	0	8	NA	NA	NA	NA	6	1
AKAP17A	0	0	662	NA	37	40	15	14	28	25	33	42	21	24	85	23	12	48	51	59	37	14	13	41	0	51	NA	NA	NA	NA	35	8
AKAP2	3	1	1103	PPP:1006:1008	86	64	32	60	9	127	75	56	19	35	92	71	16	23	85	121	61	7	17	47	3	82	1006	0.912058	1008	0.913871	62	10
AKAP3	0	0	853	NA	61	39	37	52	13	66	39	50	15	30	70	67	25	30	49	79	45	7	22	57	0	49	NA	NA	NA	NA	35	7
AKAP4	0	0	854	NA	64	26	43	49	25	64	52	46	18	32	75	83	34	15	30	93	34	6	20	45	0	30	NA	NA	NA	NA	26	2
AKAP5	0	0	427	NA	33	16	19	26	5	54	27	17	4	30	27	42	5	7	22	45	26	1	2	19	0	22	NA	NA	NA	NA	20	1
AKAP6	3	1	2319	PPP:55:57	111	73	111	159	46	217	107	117	65	91	237	166	58	44	102	315	126	21	43	110	3	99	55	0.0237171	57	0.0245796	89	5
AKAP7	0	0	350	NA	13	17	21	19	4	32	16	20	7	31	36	36	9	15	12	23	15	2	6	16	0	12	NA	NA	NA	NA	12	0
AKAP8	3	1	692	PPP:243:245	66	52	21	54	10	67	32	72	13	13	32	38	17	27	47	50	29	4	23	25	3	44	243	0.351156	245	0.354046	42	1
AKAP8L	7	1	646	PPPPPPP:602:608	42	41	19	46	8	64	34	76	10	15	33	40	25	19	34	48	38	6	28	20	7	27	602	0.931889	608	0.941176	23	2
AKAP9	0	0	3911	NA	181	196	155	169	41	598	373	122	76	193	476	338	92	91	57	302	198	14	59	180	0	57	NA	NA	NA	NA	51	3
AKD1	0	0	1911	NA	108	81	74	84	25	273	85	78	36	131	193	170	43	65	112	87	84	19	71	92	0	112	NA	NA	NA	NA	98	7
AKIP1	0	0	210	NA	20	17	5	10	4	16	8	17	7	4	17	11	5	3	13	18	9	1	9	16	0	13	NA	NA	NA	NA	11	1
AKIRIN1	4	1	192	PPPP:45:48	12	16	3	5	4	16	16	8	3	7	15	9	4	6	25	17	12	2	7	5	4	21	45	0.234375	48	0.25	15	3
AKIRIN2	0	0	203	NA	26	15	2	7	5	15	12	6	3	5	19	12	5	8	16	22	13	0	7	5	0	16	NA	NA	NA	NA	16	0
AKNA	3	4	1439	PPP:1044:1046 PPP:1263:1265 PPP:1321:1323 PPP:1378:1380	143	103	17	55	14	125	81	110	43	27	118	49	20	27	178	158	81	20	20	50	12	166	1044	0.725504	1380	0.958999	134	16
AKNAD1	0	0	836	NA	44	25	38	47	18	69	57	48	28	42	59	82	11	24	53	91	55	3	18	24	0	53	NA	NA	NA	NA	53	0
AKR1A1	0	0	325	NA	29	16	12	17	6	22	13	18	9	15	37	20	5	8	25	16	12	7	14	24	0	25	NA	NA	NA	NA	25	0
AKR1B1	0	0	316	NA	19	11	15	15	7	23	13	16	9	18	34	25	6	11	20	17	15	6	11	25	0	20	NA	NA	NA	NA	18	1
AKR1B10	0	0	316	NA	24	10	11	17	4	25	12	15	9	20	29	33	4	15	18	16	13	6	11	24	0	18	NA	NA	NA	NA	18	0
AKR1B15	0	0	344	NA	21	11	13	21	3	27	15	16	11	18	33	31	7	21	23	17	17	5	11	23	0	23	NA	NA	NA	NA	23	0
AKR1C1	0	0	323	NA	23	17	17	18	8	23	12	15	8	15	36	26	4	13	19	18	8	3	14	26	0	19	NA	NA	NA	NA	17	1
AKR1C2	0	0	323	NA	23	15	17	18	7	23	11	15	10	15	36	26	5	13	19	19	7	3	14	27	0	19	NA	NA	NA	NA	17	1
AKR1C3	0	0	323	NA	22	17	16	21	7	20	12	14	10	14	35	26	6	13	18	23	9	3	14	23	0	18	NA	NA	NA	NA	16	1
AKR1C4	0	0	323	NA	19	14	15	21	7	20	16	14	8	12	38	25	9	14	20	16	10	3	15	27	0	20	NA	NA	NA	NA	18	1
AKR1CL1	0	0	152	NA	13	5	2	10	1	14	4	9	5	10	14	11	4	8	9	6	9	3	5	10	0	9	NA	NA	NA	NA	9	0
AKR1D1	0	0	326	NA	19	18	18	16	6	25	10	17	10	23	31	23	6	12	20	18	13	5	14	22	0	20	NA	NA	NA	NA	18	1
AKR1E2	0	0	320	NA	16	16	16	18	10	20	10	16	13	26	32	22	7	14	19	20	13	5	9	18	0	19	NA	NA	NA	NA	17	1
AKR7A2	4	2	359	PPP:21:23 PPPP:33:36	43	22	10	12	8	25	15	29	14	6	38	13	9	13	21	23	17	7	13	21	7	14	21	0.0584958	36	0.100279	14	0
AKR7A3	0	0	331	NA	32	21	11	10	7	25	15	27	13	9	37	12	10	15	15	18	19	6	13	16	0	15	NA	NA	NA	NA	15	0
AKR7L	0	0	331	NA	37	18	9	11	7	24	16	26	14	10	35	12	9	14	15	21	17	7	13	15	0	15	NA	NA	NA	NA	15	0
AKT1	0	0	480	NA	25	30	13	28	7	49	17	30	13	20	41	36	16	27	22	23	30	7	18	28	0	22	NA	NA	NA	NA	18	2
AKT1S1	5	2	276	PPPPP:55:59 PPP:100:102	37	21	4	18	4	26	7	20	3	3	22	6	5	7	39	20	19	2	3	10	8	31	55	0.199275	102	0.369565	17	7
AKT2	0	0	481	NA	26	35	12	30	7	43	15	27	11	21	45	31	16	26	25	26	29	7	19	30	0	25	NA	NA	NA	NA	19	3
AKT3	0	0	479	NA	19	29	15	36	8	42	14	28	11	24	40	39	16	26	22	24	33	7	20	26	0	22	NA	NA	NA	NA	18	2
AKTIP	0	0	292	NA	19	13	9	14	2	15	11	12	8	11	20	25	5	15	28	24	17	6	12	26	0	28	NA	NA	NA	NA	26	1
ALAD	0	0	330	NA	40	23	5	18	8	20	10	23	9	12	35	12	11	12	22	19	11	3	12	25	0	22	NA	NA	NA	NA	20	1
ALAS1	0	0	640	NA	52	37	20	33	15	33	31	43	23	24	53	38	23	26	37	55	30	2	15	50	0	37	NA	NA	NA	NA	33	2
ALAS2	0	0	587	NA	47	27	18	26	15	29	29	46	24	28	57	33	17	26	32	46	25	5	15	42	0	32	NA	NA	NA	NA	30	1
ALB	0	0	618	NA	63	27	17	37	36	62	20	13	15	9	66	60	7	39	26	28	29	2	19	43	0	26	NA	NA	NA	NA	26	0
ALCAM	3	1	583	PPP:276:278	29	19	31	28	12	43	19	32	8	42	48	46	11	16	32	50	44	6	25	42	3	29	276	0.473413	278	0.476844	27	1
ALDH16A1	0	0	802	NA	114	58	13	28	18	48	37	82	15	15	97	13	12	18	61	48	28	21	12	64	0	61	NA	NA	NA	NA	51	5
ALDH18A1	0	0	795	NA	64	48	27	41	13	50	37	56	29	47	92	38	16	23	30	60	38	5	11	70	0	30	NA	NA	NA	NA	26	2
ALDH1A1	0	0	501	NA	38	17	20	26	11	32	18	48	8	35	37	38	9	22	24	29	28	7	16	38	0	24	NA	NA	NA	NA	22	1
ALDH1A2	0	0	518	NA	49	24	23	23	8	37	21	47	5	36	36	31	13	28	27	28	26	6	13	37	0	27	NA	NA	NA	NA	25	1
ALDH1A3	0	0	512	NA	49	23	21	24	14	39	18	41	6	27	43	40	7	26	30	22	30	6	9	37	0	30	NA	NA	NA	NA	26	2
ALDH1B1	0	0	517	NA	48	29	20	25	8	37	24	46	9	22	43	31	9	28	26	19	30	7	14	42	0	26	NA	NA	NA	NA	24	1
ALDH1L1	0	0	912	NA	80	39	34	54	15	63	30	81	20	48	80	59	21	44	44	45	47	11	17	80	0	44	NA	NA	NA	NA	42	1
ALDH1L2	0	0	923	NA	73	38	37	49	12	67	33	83	13	58	76	71	23	42	42	48	51	11	26	70	0	42	NA	NA	NA	NA	40	1
ALDH2	0	0	517	NA	55	25	21	28	9	27	26	48	6	25	37	29	10	25	25	23	28	7	17	46	0	25	NA	NA	NA	NA	23	1
ALDH3A1	0	0	511	NA	32	32	17	20	9	40	30	38	12	31	48	27	12	16	32	32	25	4	20	34	0	32	NA	NA	NA	NA	30	1
ALDH3A2	0	0	508	NA	31	28	21	21	8	35	20	32	10	40	59	39	10	23	23	23	25	6	16	38	0	23	NA	NA	NA	NA	21	1
ALDH3B2	0	0	385	NA	20	14	16	15	10	21	23	31	8	18	44	15	8	19	25	28	22	5	13	30	0	25	NA	NA	NA	NA	23	1
ALDH4A1	0	0	563	NA	57	26	16	29	8	30	22	45	13	27	47	36	8	28	35	41	27	10	17	41	0	35	NA	NA	NA	NA	31	2
ALDH5A1	0	0	548	NA	70	31	18	20	15	34	18	53	7	24	49	28	9	24	27	31	26	7	12	45	0	27	NA	NA	NA	NA	27	0
ALDH6A1	0	0	535	NA	53	20	27	21	8	27	21	44	9	31	43	34	19	21	30	35	32	6	11	43	0	30	NA	NA	NA	NA	30	0
ALDH7A1	0	0	539	NA	49	27	24	18	10	36	17	59	8	37	43	30	10	17	24	31	27	13	14	45	0	24	NA	NA	NA	NA	24	0
ALDH8A1	0	0	487	NA	42	23	17	18	14	34	14	33	9	28	43	28	10	20	27	43	27	9	10	38	0	27	NA	NA	NA	NA	25	1
ALDH9A1	0	0	518	NA	49	27	19	19	16	37	18	48	4	28	41	27	16	26	28	29	27	4	13	42	0	28	NA	NA	NA	NA	26	1
ALDOA	0	0	418	NA	47	17	16	14	8	27	21	34	12	20	39	28	8	11	23	26	28	3	13	23	0	23	NA	NA	NA	NA	19	2
ALDOB	0	0	364	NA	44	14	17	13	9	23	22	29	9	19	33	24	7	10	13	21	21	3	11	22	0	13	NA	NA	NA	NA	13	0
ALDOC	0	0	364	NA	43	20	14	18	7	25	15	31	7	20	31	21	4	9	19	19	18	3	13	27	0	19	NA	NA	NA	NA	17	1
ALG1	0	0	464	NA	29	26	15	20	14	26	18	30	18	11	74	18	13	21	25	30	16	12	11	37	0	25	NA	NA	NA	NA	23	1
ALG10	0	0	473	NA	27	19	15	7	13	14	16	18	9	30	66	22	11	58	21	34	23	13	26	31	0	21	NA	NA	NA	NA	17	2
ALG10B	0	0	473	NA	29	17	15	7	14	13	16	18	11	30	66	22	11	57	21	33	22	13	26	32	0	21	NA	NA	NA	NA	17	2
ALG11	0	0	492	NA	25	22	23	16	14	26	17	36	13	31	59	29	11	30	20	32	18	7	20	43	0	20	NA	NA	NA	NA	16	2
ALG12	0	0	488	NA	43	27	14	10	7	13	15	32	17	15	86	13	11	23	25	27	26	13	21	50	0	25	NA	NA	NA	NA	21	2
ALG13	27	3	1137	PPPPPPPPPPPPPPPPPPPPPPPPPPP:919:945 PPPP:957:960 PPPP:962:965	69	43	51	45	31	68	56	79	36	36	81	57	30	35	118	104	53	6	69	70	35	83	919	0.808267	965	0.848725	67	8
ALG14	0	0	216	NA	13	13	5	8	5	8	3	11	6	18	26	9	6	6	11	21	10	4	9	24	0	11	NA	NA	NA	NA	11	0
ALG1L	0	0	187	NA	7	8	6	10	8	14	9	11	5	2	28	7	8	11	11	17	5	5	0	15	0	11	NA	NA	NA	NA	11	0
ALG2	0	0	416	NA	30	27	7	23	12	29	13	24	11	15	52	23	7	22	21	26	16	5	15	38	0	21	NA	NA	NA	NA	21	0
ALG3	0	0	438	NA	35	26	10	7	13	11	18	26	15	18	79	11	8	32	22	25	23	14	18	27	0	22	NA	NA	NA	NA	18	2
ALG5	0	0	324	NA	30	19	7	14	4	21	13	18	5	17	36	26	10	19	12	19	16	8	9	21	0	12	NA	NA	NA	NA	12	0
ALG6	0	0	509	NA	22	12	15	15	21	16	16	19	8	36	83	31	13	45	22	43	24	11	19	38	0	22	NA	NA	NA	NA	16	3
ALG8	0	0	526	NA	34	14	14	11	13	15	12	26	15	32	88	30	10	47	27	38	29	14	23	34	0	27	NA	NA	NA	NA	25	1
ALG9	0	0	844	NA	75	48	24	28	22	43	28	53	22	36	107	34	15	60	48	56	36	19	42	48	0	48	NA	NA	NA	NA	48	0
ALK	3	1	1620	PPP:1441:1443	111	86	65	59	39	102	63	164	40	66	164	68	41	52	126	140	74	33	37	90	3	123	1441	0.889506	1443	0.890741	105	9
ALKBH1	0	0	389	NA	32	23	13	22	7	25	18	26	11	12	37	22	10	19	25	31	13	7	14	22	0	25	NA	NA	NA	NA	25	0
ALKBH2	0	0	261	NA	17	24	6	12	3	18	7	25	11	8	23	17	3	12	16	16	14	4	6	19	0	16	NA	NA	NA	NA	16	0
ALKBH3	3	1	286	PPP:221:223	16	26	9	14	4	24	14	14	11	12	19	15	4	7	25	14	19	9	11	19	3	22	221	0.772727	223	0.77972	22	0
ALKBH4	0	0	302	NA	25	29	3	12	12	28	11	23	5	10	33	9	5	12	23	20	10	7	5	20	0	23	NA	NA	NA	NA	19	2
ALKBH5	0	0	458	NA	42	39	11	23	12	34	16	30	12	23	33	25	4	22	29	43	9	6	16	29	0	29	NA	NA	NA	NA	23	3
ALKBH6	3	1	266	PPP:182:184	20	24	7	11	3	17	8	24	5	8	35	7	6	5	32	13	10	3	9	19	3	29	182	0.684211	184	0.691729	23	3
ALKBH7	3	1	221	PPP:217:219	17	24	0	7	3	21	6	21	6	10	27	3	3	7	16	22	8	4	5	11	3	13	217	0.9819	219	0.99095	13	0
ALKBH8	0	0	667	NA	30	41	28	34	15	48	33	44	21	32	56	45	14	22	34	59	28	8	24	51	0	34	NA	NA	NA	NA	28	3
ALLC	0	0	391	NA	29	24	14	25	7	27	9	33	9	25	33	21	6	20	28	21	21	10	6	23	0	28	NA	NA	NA	NA	26	1
ALMS1	0	0	4167	NA	229	176	134	209	42	339	259	196	143	179	315	276	38	128	320	523	300	24	91	246	0	320	NA	NA	NA	NA	306	7
ALOX12	3	1	663	PPP:564:566	52	42	18	38	17	44	40	39	18	29	83	27	18	26	43	29	30	19	17	34	3	40	564	0.850679	566	0.853695	32	4
ALOX12B	0	0	701	NA	44	46	23	33	16	42	22	43	22	43	77	30	14	33	50	34	41	13	36	39	0	50	NA	NA	NA	NA	46	2
ALOX15	4	2	684	PPPP:348:351 PPP:586:588	47	44	17	36	13	46	35	49	17	26	91	34	17	26	41	36	27	18	17	47	7	34	348	0.508772	588	0.859649	28	3
ALOX15B	3	1	676	PPP:577:579	49	35	22	28	11	45	36	46	19	32	84	23	11	32	53	41	37	16	18	38	3	50	577	0.85355	579	0.856509	38	6
ALOX5	3	1	674	PPP:575:577	43	36	26	44	13	48	31	33	17	44	59	38	16	35	34	33	30	15	30	49	3	31	575	0.853116	577	0.856083	29	1
ALOX5AP	0	0	161	NA	11	7	7	3	2	6	8	12	2	11	18	4	3	16	5	10	12	1	9	14	0	5	NA	NA	NA	NA	5	0
ALOXE3	3	1	867	PPP:768:770	59	63	27	37	28	43	43	54	23	36	101	27	17	32	68	62	59	17	33	38	3	65	768	0.885813	770	0.88812	61	2
ALPI	0	0	528	NA	64	23	20	28	6	26	28	46	15	16	54	17	13	17	31	32	34	6	17	35	0	31	NA	NA	NA	NA	29	1
ALPK1	0	0	1244	NA	74	55	60	62	25	95	70	80	40	50	123	74	17	43	60	123	66	20	31	76	0	60	NA	NA	NA	NA	56	2
ALPK2	0	0	2170	NA	146	85	85	106	53	213	118	150	58	87	153	139	31	63	131	248	138	15	39	112	0	131	NA	NA	NA	NA	121	5
ALPK3	0	0	1907	NA	180	130	26	64	40	153	117	222	25	44	144	90	26	31	180	174	126	19	26	90	0	180	NA	NA	NA	NA	158	11
ALPL	0	0	524	NA	49	21	27	29	6	29	15	45	22	18	49	28	15	15	25	31	35	5	21	39	0	25	NA	NA	NA	NA	23	1
ALPP	0	0	535	NA	59	31	16	31	6	30	20	49	15	18	58	20	15	17	31	29	36	4	17	33	0	31	NA	NA	NA	NA	29	1
ALPPL2	0	0	532	NA	60	28	15	31	5	27	22	51	16	17	56	20	13	18	31	30	36	5	17	34	0	31	NA	NA	NA	NA	31	0
ALS2	0	0	1657	NA	103	77	49	75	32	117	76	130	39	63	189	88	29	58	85	154	101	28	57	107	0	85	NA	NA	NA	NA	77	4
ALS2CL	0	0	953	NA	58	63	13	50	23	74	63	81	39	17	137	32	15	34	45	56	48	18	31	56	0	45	NA	NA	NA	NA	41	2
ALS2CR11	3	1	1820	PPP:269:271	57	73	113	84	15	170	86	56	55	121	177	180	32	71	107	191	98	9	52	73	3	104	269	0.147802	271	0.148901	98	3
ALS2CR12	0	0	445	NA	19	19	25	18	6	58	32	12	10	25	44	53	14	10	15	30	21	7	13	14	0	15	NA	NA	NA	NA	15	0
ALS2CR8	0	0	725	NA	32	31	40	30	10	55	56	34	16	35	66	36	15	17	55	70	53	5	16	53	0	55	NA	NA	NA	NA	53	1
ALX1	0	0	326	NA	21	22	17	13	6	23	16	17	12	6	24	19	10	15	16	36	22	4	10	17	0	16	NA	NA	NA	NA	14	1
ALX3	0	0	343	NA	28	20	8	12	6	19	12	34	12	5	30	16	4	12	55	29	14	4	11	12	0	55	NA	NA	NA	NA	45	5
ALX4	3	1	411	PPP:101:103	46	22	11	16	7	22	32	33	9	3	27	20	8	14	41	45	20	4	13	18	3	38	101	0.245742	103	0.250608	30	4
AMACR	0	0	394	NA	29	26	12	21	6	28	14	36	6	20	44	21	11	21	22	26	15	5	10	21	0	22	NA	NA	NA	NA	22	0
AMBN	3	1	447	PPP:107:109	37	11	13	21	1	27	29	38	11	9	49	15	25	20	65	33	20	3	9	11	3	62	107	0.239374	109	0.243848	56	3
AMBP	0	0	352	NA	21	19	14	12	16	28	13	36	4	15	27	18	10	14	18	20	25	5	15	22	0	18	NA	NA	NA	NA	16	1
AMBRA1	6	2	1298	PPPPPP:270:275 PPP:436:438	90	113	56	45	15	86	72	98	39	42	118	12	23	33	100	165	84	18	28	61	9	91	270	0.208012	438	0.337442	85	3
AMD1	0	0	334	NA	15	15	12	21	7	19	20	16	4	17	26	21	12	25	15	32	21	4	13	19	0	15	NA	NA	NA	NA	15	0
AMDHD1	0	0	426	NA	45	25	11	19	10	34	15	38	18	30	45	20	16	13	11	21	19	2	9	25	0	11	NA	NA	NA	NA	11	0
AMDHD2	0	0	594	NA	60	43	7	29	17	25	22	65	22	22	67	11	7	21	46	35	30	13	5	47	0	46	NA	NA	NA	NA	40	3
AMELX	3	1	205	PPP:134:136	9	3	4	4	1	5	25	8	15	9	17	3	11	4	49	8	9	4	7	10	3	46	134	0.653659	136	0.663415	30	8
AMELY	0	0	206	NA	11	5	4	4	1	5	27	8	14	9	20	3	9	5	42	9	8	4	6	12	0	42	NA	NA	NA	NA	30	6
AMFR	0	0	643	NA	48	46	23	27	14	45	32	29	22	24	81	13	21	32	33	51	32	11	13	46	0	33	NA	NA	NA	NA	31	1
AMH	3	2	560	PPP:151:153 PPP:272:274	74	52	8	25	12	30	18	51	7	4	95	3	4	9	66	31	27	8	6	30	6	60	151	0.269643	274	0.489286	48	6
AMHR2	3	2	573	PPP:124:126 PPP:433:435	48	40	9	26	25	34	32	45	13	18	80	7	7	15	61	41	27	13	11	21	6	55	124	0.216405	435	0.759162	47	4
AMICA1	0	0	394	NA	10	16	17	14	11	31	14	28	13	25	43	27	10	13	20	28	18	4	12	40	0	20	NA	NA	NA	NA	18	1
AMIGO1	0	0	493	NA	22	20	29	27	15	22	23	26	18	10	79	22	10	17	28	45	26	7	14	33	0	28	NA	NA	NA	NA	28	0
AMIGO2	0	0	522	NA	30	26	33	25	17	18	12	29	15	24	66	26	12	27	23	52	29	4	14	40	0	23	NA	NA	NA	NA	23	0
AMIGO3	0	0	504	NA	47	38	20	19	18	23	16	38	25	6	90	7	4	20	33	37	19	5	10	29	0	33	NA	NA	NA	NA	27	3
AMMECR1	3	1	333	PPP:87:89	19	19	8	9	14	15	9	45	11	11	30	15	6	11	22	41	21	3	13	11	3	19	87	0.261261	89	0.267267	11	4
AMMECR1L	0	0	310	NA	15	20	14	12	10	15	9	24	10	11	30	18	4	12	24	27	25	3	12	15	0	24	NA	NA	NA	NA	18	3
AMN	0	0	453	NA	64	35	8	25	13	23	12	46	12	4	57	4	4	19	32	30	12	8	3	42	0	32	NA	NA	NA	NA	28	2
AMN1	0	0	258	NA	14	11	12	14	15	10	10	13	8	18	38	16	5	4	11	22	12	2	4	19	0	11	NA	NA	NA	NA	9	1
AMOT	3	1	1084	PPP:238:240	139	65	36	29	8	87	100	50	37	31	86	50	26	12	100	92	58	2	23	53	3	97	238	0.219557	240	0.221402	83	7
AMOTL1	4	4	956	PPP:309:311 PPP:366:368 PPP:420:422 PPPP:847:850	86	61	30	31	6	94	73	55	36	25	82	57	26	18	66	88	53	6	23	40	13	53	309	0.323222	850	0.889121	53	0
AMOTL2	4	2	837	PPP:267:269 PPPP:330:333	98	82	13	26	8	78	81	60	25	16	90	27	14	7	54	76	41	3	12	26	7	47	267	0.318996	333	0.397849	33	7
AMPD1	0	0	780	NA	46	36	38	44	13	54	28	29	26	40	73	56	27	47	43	57	38	6	38	41	0	43	NA	NA	NA	NA	41	1
AMPD2	0	0	879	NA	59	67	28	42	14	75	38	43	34	30	99	41	25	37	60	64	32	6	33	52	0	60	NA	NA	NA	NA	54	3
AMPD3	3	1	776	PPP:209:211	50	41	31	41	9	60	33	28	29	31	84	51	25	35	55	56	37	6	41	33	3	52	209	0.26933	211	0.271907	42	5
AMPH	0	0	695	NA	68	25	17	41	3	83	37	38	11	21	56	43	10	24	61	47	48	7	11	44	0	61	NA	NA	NA	NA	49	6
AMT	0	0	403	NA	34	28	11	19	10	19	17	35	11	10	48	17	15	10	21	24	22	3	9	40	0	21	NA	NA	NA	NA	19	1
AMTN	0	0	209	NA	16	4	7	7	1	5	19	22	6	11	31	2	3	6	24	15	23	0	0	7	0	24	NA	NA	NA	NA	22	1
AMY1A	0	0	511	NA	28	28	42	34	13	19	14	51	11	29	29	23	10	29	22	33	22	18	20	36	0	22	NA	NA	NA	NA	18	2
AMY1B	0	0	511	NA	27	28	41	35	12	20	12	52	12	28	27	24	11	29	22	33	23	19	21	35	0	22	NA	NA	NA	NA	18	2
AMY1C	0	0	511	NA	27	28	41	35	12	20	12	52	12	28	27	24	11	29	22	33	23	19	21	35	0	22	NA	NA	NA	NA	18	2
AMY2A	0	0	511	NA	28	28	43	34	12	19	14	51	11	28	28	23	10	30	23	32	22	18	21	36	0	23	NA	NA	NA	NA	19	2
AMY2B	0	0	511	NA	28	28	43	34	11	19	14	51	12	28	28	23	11	30	23	32	22	18	20	36	0	23	NA	NA	NA	NA	19	2
AMZ1	0	0	498	NA	50	36	4	27	20	35	22	31	12	9	67	15	6	22	38	46	19	10	7	22	0	38	NA	NA	NA	NA	32	3
AMZ2	0	0	360	NA	17	16	14	17	10	22	14	19	13	26	34	27	5	18	20	31	17	7	15	18	0	20	NA	NA	NA	NA	20	0
ANAPC1	0	0	1944	NA	116	81	80	82	38	121	83	108	67	88	246	79	57	67	120	191	104	25	60	131	0	120	NA	NA	NA	NA	104	8
ANAPC10	0	0	185	NA	5	13	9	10	3	9	11	10	6	13	11	11	5	6	12	14	17	3	6	11	0	12	NA	NA	NA	NA	10	1
ANAPC11	0	0	196	NA	20	13	5	9	12	6	8	19	7	5	18	3	4	2	24	14	9	5	0	13	0	24	NA	NA	NA	NA	20	2
ANAPC13	0	0	74	NA	3	3	4	9	0	10	4	4	1	4	8	3	2	0	6	2	3	2	2	4	0	6	NA	NA	NA	NA	4	1
ANAPC16	0	0	110	NA	10	4	0	4	1	10	5	11	1	1	10	6	3	6	5	18	4	1	2	8	0	5	NA	NA	NA	NA	3	1
ANAPC2	0	0	822	NA	56	70	15	50	15	77	41	42	12	30	109	29	19	27	39	62	34	14	23	58	0	39	NA	NA	NA	NA	29	5
ANAPC4	0	0	809	NA	46	35	34	40	14	69	29	32	17	38	102	51	21	39	29	76	45	12	27	53	0	29	NA	NA	NA	NA	25	2
ANAPC5	0	0	755	NA	74	31	32	29	12	55	50	31	27	28	114	45	22	27	19	60	24	6	25	44	0	19	NA	NA	NA	NA	17	1
ANAPC7	0	0	599	NA	58	29	28	37	11	40	32	28	9	25	79	36	21	11	22	49	21	5	24	34	0	22	NA	NA	NA	NA	18	2
ANG	0	0	147	NA	6	13	9	6	6	4	6	12	6	7	14	7	3	6	10	9	9	1	4	9	0	10	NA	NA	NA	NA	6	2
ANGEL1	0	0	670	NA	49	37	19	34	24	57	37	43	15	20	89	14	17	26	49	47	25	15	19	34	0	49	NA	NA	NA	NA	47	1
ANGEL2	0	0	544	NA	21	33	25	27	20	32	22	30	24	25	57	29	8	21	34	52	19	11	22	32	0	34	NA	NA	NA	NA	30	2
ANGPT1	0	0	498	NA	21	22	37	20	10	40	37	35	17	24	52	32	17	18	11	27	34	8	20	16	0	11	NA	NA	NA	NA	11	0
ANGPT2	0	0	496	NA	21	14	37	25	9	37	39	27	8	27	45	37	17	16	10	39	33	10	20	25	0	10	NA	NA	NA	NA	10	0
ANGPT4	0	0	503	NA	37	32	25	17	9	28	55	30	14	12	69	23	13	11	15	42	26	8	13	24	0	15	NA	NA	NA	NA	13	1
ANGPTL1	3	1	491	PPP:251:253	17	29	31	28	8	30	26	36	11	26	45	33	17	17	23	28	26	11	22	27	3	20	251	0.511202	253	0.515275	16	2
ANGPTL2	3	2	493	PPP:216:218 PPP:252:254	23	33	31	21	9	35	32	34	15	19	50	23	10	12	27	27	26	14	25	27	6	21	216	0.438134	254	0.515213	17	2
ANGPTL3	0	0	460	NA	9	19	32	22	4	41	27	23	15	31	48	38	5	18	19	38	25	9	18	19	0	19	NA	NA	NA	NA	19	0
ANGPTL4	0	0	406	NA	35	29	10	19	7	19	36	34	18	8	47	16	7	14	23	32	18	10	5	19	0	23	NA	NA	NA	NA	19	2
ANGPTL5	0	0	388	NA	13	17	26	28	14	20	14	27	11	19	33	26	13	19	11	33	21	7	13	23	0	11	NA	NA	NA	NA	11	0
ANGPTL6	4	1	470	PPPP:197:200	56	43	7	20	7	27	31	51	17	3	53	9	6	10	31	27	15	14	15	28	4	27	197	0.419149	200	0.425532	25	1
ANGPTL7	0	0	346	NA	17	18	22	19	9	22	18	22	9	12	34	25	9	11	10	28	15	10	18	18	0	10	NA	NA	NA	NA	8	1
ANK1	3	1	1905	PPP:962:964	166	103	87	101	21	148	92	128	71	75	209	92	36	41	98	133	114	13	32	145	3	95	962	0.504987	964	0.506037	89	3
ANK2	3	1	3957	PPP:1050:1052	260	169	109	238	44	421	177	214	113	152	315	278	65	89	255	418	307	10	55	268	3	252	1050	0.265353	1052	0.265858	222	15
ANK3	5	3	4377	PPP:1033:1035 PPP:1223:1225 PPPPP:3255:3259	299	177	165	248	40	360	191	230	119	184	334	367	86	118	274	483	329	16	78	279	11	263	1033	0.236006	3259	0.744574	239	12
ANKAR	0	0	1434	NA	106	60	76	61	33	85	70	64	32	122	162	97	31	63	57	100	71	11	54	79	0	57	NA	NA	NA	NA	49	4
ANKDD1A	0	0	522	NA	64	35	19	31	7	32	28	38	31	16	71	16	10	10	13	29	19	11	5	37	0	13	NA	NA	NA	NA	11	1
ANKDD1B	0	0	338	NA	33	14	26	18	1	21	16	15	22	14	45	24	8	8	6	20	11	3	3	29	0	6	NA	NA	NA	NA	6	0
ANKFN1	0	0	763	NA	40	47	38	28	16	48	52	28	23	37	87	38	23	29	30	72	52	12	23	40	0	30	NA	NA	NA	NA	30	0
ANKFY1	0	0	1170	NA	125	53	69	66	28	73	57	66	44	51	155	52	25	33	39	75	59	11	18	71	0	39	NA	NA	NA	NA	35	2
ANKH	0	0	492	NA	49	19	14	18	9	22	4	29	13	35	56	23	18	27	23	31	31	7	17	47	0	23	NA	NA	NA	NA	21	1
ANKHD1	4	3	2617	PPPP:31:34 PPP:706:708 PPP:2365:2367	245	97	126	131	36	164	132	202	75	88	240	127	49	61	190	267	184	8	25	170	10	180	31	0.0118456	2367	0.904471	152	14
ANKIB1	3	1	1089	PPP:291:293	80	60	48	76	37	96	45	58	30	39	105	55	27	32	69	96	53	16	26	41	3	66	291	0.267218	293	0.269054	62	2
ANKK1	0	0	765	NA	79	39	25	39	14	44	39	48	31	32	103	38	21	19	41	50	27	13	16	47	0	41	NA	NA	NA	NA	35	3
ANKLE1	0	0	615	NA	68	53	8	34	15	41	35	49	25	14	75	8	3	11	55	37	34	10	7	33	0	55	NA	NA	NA	NA	41	7
ANKLE2	3	1	938	PPP:50:52	82	69	33	52	15	76	29	60	22	25	93	55	13	28	74	81	42	11	27	51	3	71	50	0.0533049	52	0.0554371	59	6
ANKMY1	3	1	1030	PPP:484:486	68	58	27	55	30	78	42	81	28	36	118	54	25	43	66	80	48	13	34	46	3	63	484	0.469903	486	0.471845	53	5
ANKMY2	0	0	441	NA	29	13	21	21	18	42	22	28	13	23	41	41	14	12	17	20	24	2	10	30	0	17	NA	NA	NA	NA	15	1
ANKRA2	0	0	313	NA	20	7	19	17	6	22	15	21	11	16	34	15	10	7	14	26	20	2	8	23	0	14	NA	NA	NA	NA	14	0
ANKRD1	0	0	319	NA	27	17	14	18	5	34	8	16	9	15	41	35	7	7	11	10	16	3	7	19	0	11	NA	NA	NA	NA	11	0
ANKRD10	0	0	420	NA	39	15	25	20	14	24	17	40	22	14	41	11	5	14	19	41	25	4	7	23	0	19	NA	NA	NA	NA	19	0
ANKRD11	3	2	2663	PPP:2352:2354 PPP:2493:2495	211	165	60	215	33	284	90	134	60	56	186	323	31	66	213	259	101	16	50	110	6	207	2352	0.883214	2495	0.936913	167	20
ANKRD12	3	1	2062	PPP:1891:1893	76	91	97	143	27	225	92	53	60	86	159	263	36	52	109	247	111	7	39	89	3	106	1891	0.917071	1893	0.918041	100	3
ANKRD13A	0	0	590	NA	35	35	28	34	7	62	29	27	15	26	62	28	13	23	22	40	39	11	14	40	0	22	NA	NA	NA	NA	20	1
ANKRD13B	0	0	626	NA	43	51	19	27	8	53	34	42	15	23	64	25	12	18	40	48	43	9	14	38	0	40	NA	NA	NA	NA	34	3
ANKRD13C	3	1	541	PPP:414:416	38	31	23	28	7	44	19	32	19	29	57	36	10	26	33	40	27	5	10	27	3	30	414	0.76525	416	0.768946	26	2
ANKRD13D	3	1	605	PPP:520:522	43	46	19	23	5	60	36	33	18	17	65	16	12	21	47	47	35	11	9	42	3	44	520	0.859504	522	0.86281	36	4
ANKRD16	0	0	361	NA	46	25	8	24	13	19	15	30	19	11	49	16	8	3	12	16	19	4	7	17	0	12	NA	NA	NA	NA	12	0
ANKRD17	3	4	2603	PPP:727:729 PPP:1886:1888 PPP:2129:2131 PPP:2180:2182	269	105	124	101	33	167	123	201	70	99	224	127	55	40	202	272	186	10	30	165	12	190	727	0.279293	2182	0.838264	150	20
ANKRD18A	0	0	992	NA	66	61	67	45	18	122	51	25	29	49	123	109	26	25	16	53	42	3	21	41	0	16	NA	NA	NA	NA	16	0
ANKRD18B	0	0	1011	NA	66	60	66	48	17	123	50	25	31	51	126	118	31	25	16	53	39	4	23	39	0	16	NA	NA	NA	NA	16	0
ANKRD2	3	1	360	PPP:136:138	40	24	9	25	3	35	17	26	15	12	43	24	9	5	17	11	18	4	2	21	3	14	136	0.377778	138	0.383333	14	0
ANKRD20A1	0	0	823	NA	59	43	44	43	16	90	51	29	26	40	77	93	14	15	19	56	40	3	18	47	0	19	NA	NA	NA	NA	17	1
ANKRD20A2	0	0	823	NA	59	45	44	44	16	90	51	29	26	40	77	93	14	15	19	56	38	2	18	47	0	19	NA	NA	NA	NA	17	1
ANKRD20A3	0	0	823	NA	59	45	44	43	16	90	51	29	26	40	77	92	14	15	19	56	39	2	19	47	0	19	NA	NA	NA	NA	17	1
ANKRD20A4	0	0	823	NA	59	42	45	42	16	90	53	28	26	40	76	94	14	16	19	56	38	3	18	48	0	19	NA	NA	NA	NA	17	1
ANKRD22	0	0	191	NA	15	12	11	9	7	9	8	9	4	12	26	13	6	7	5	9	7	2	8	12	0	5	NA	NA	NA	NA	5	0
ANKRD23	0	0	305	NA	30	27	11	17	5	20	15	22	15	7	39	21	3	6	16	9	10	5	4	23	0	16	NA	NA	NA	NA	14	1
ANKRD24	4	1	1236	PPPP:398:401	189	103	19	43	17	157	89	105	24	22	130	40	23	8	64	72	60	3	10	58	4	60	398	0.322006	401	0.324434	44	8
ANKRD26	0	0	1726	NA	90	80	113	100	22	211	127	55	40	63	195	181	42	33	40	142	76	5	30	81	0	40	NA	NA	NA	NA	38	1
ANKRD27	0	0	1050	NA	82	54	42	54	32	75	58	52	39	39	122	64	17	34	49	94	45	5	26	67	0	49	NA	NA	NA	NA	47	1
ANKRD28	0	0	1086	NA	126	38	71	67	31	54	29	75	49	43	133	48	20	23	39	78	61	5	26	70	0	39	NA	NA	NA	NA	37	1
ANKRD29	0	0	301	NA	40	20	15	16	3	12	11	27	8	9	45	16	6	10	7	15	17	2	5	17	0	7	NA	NA	NA	NA	7	0
ANKRD30A	0	0	1460	NA	107	46	69	69	33	179	87	37	39	68	127	172	38	28	70	111	76	12	22	70	0	70	NA	NA	NA	NA	58	6
ANKRD30B	0	0	1392	NA	88	54	75	66	27	160	80	51	27	52	130	154	27	37	59	98	101	9	28	69	0	59	NA	NA	NA	NA	57	1
ANKRD30BL	0	0	258	NA	27	14	17	15	6	19	10	12	7	11	25	20	5	3	11	15	15	2	6	18	0	11	NA	NA	NA	NA	11	0
ANKRD31	0	0	1873	NA	98	75	123	112	37	166	99	79	60	93	188	159	33	44	83	189	93	12	39	91	0	83	NA	NA	NA	NA	81	1
ANKRD32	0	0	1058	NA	53	39	47	43	26	85	42	53	39	61	128	105	27	44	32	86	47	15	30	56	0	32	NA	NA	NA	NA	28	2
ANKRD33	4	1	452	PPPP:350:353	40	28	6	19	14	21	32	27	13	8	59	15	8	7	45	35	25	9	7	34	4	41	350	0.774336	353	0.780973	37	2
ANKRD33B	4	2	494	PPPP:19:22 PPPP:264:267	57	51	9	23	10	44	20	39	7	9	37	19	9	10	47	27	26	5	9	36	8	39	19	0.0384615	267	0.540486	33	3
ANKRD34A	3	1	496	PPP:298:300	44	47	8	20	5	32	18	53	12	10	56	15	7	6	71	42	26	2	6	16	3	68	298	0.600806	300	0.604839	46	11
ANKRD34B	0	0	514	NA	31	19	24	27	10	31	25	26	16	27	60	40	10	10	37	57	29	2	9	24	0	37	NA	NA	NA	NA	23	7
ANKRD34C	0	0	535	NA	36	33	19	37	7	27	15	31	13	24	64	42	9	7	45	65	28	4	6	23	0	45	NA	NA	NA	NA	33	6
ANKRD35	0	0	1001	NA	123	74	24	35	16	118	80	70	22	20	128	59	13	6	41	73	31	12	9	47	0	41	NA	NA	NA	NA	37	2
ANKRD36	3	1	1941	PPP:540:542	128	102	82	126	32	179	113	81	31	101	163	234	27	30	68	191	119	5	31	98	3	65	540	0.278207	542	0.279238	47	9
ANKRD37	0	0	158	NA	16	4	7	11	10	7	9	11	4	3	23	11	2	3	8	11	7	2	0	9	0	8	NA	NA	NA	NA	6	1
ANKRD39	0	0	183	NA	22	12	4	14	9	7	7	15	11	5	23	6	3	2	9	16	7	1	4	6	0	9	NA	NA	NA	NA	9	0
ANKRD40	0	0	368	NA	23	21	20	21	7	31	22	18	3	11	41	17	7	15	37	25	18	2	7	22	0	37	NA	NA	NA	NA	23	7
ANKRD42	0	0	591	NA	42	64	14	43	18	40	16	64	26	14	38	12	5	20	20	75	23	14	5	38	0	20	NA	NA	NA	NA	18	1
ANKRD43	3	2	549	PPP:183:185 PPP:300:302	75	51	4	22	3	29	16	52	12	3	66	18	6	13	75	45	20	3	4	32	6	69	183	0.333333	302	0.550091	51	9
ANKRD44	0	0	985	NA	117	38	66	61	32	61	28	65	52	47	121	51	13	20	30	49	50	6	16	62	0	30	NA	NA	NA	NA	28	1
ANKRD45	0	0	266	NA	24	12	11	15	5	37	15	11	5	9	28	17	4	7	10	16	19	3	5	13	0	10	NA	NA	NA	NA	8	1
ANKRD46	0	0	232	NA	15	17	12	13	4	12	13	18	7	12	33	7	3	11	4	18	12	2	5	14	0	4	NA	NA	NA	NA	4	0
ANKRD49	0	0	239	NA	16	12	15	19	2	23	10	12	11	8	30	13	3	5	8	14	17	5	6	10	0	8	NA	NA	NA	NA	8	0
ANKRD5	0	0	776	NA	71	41	42	49	13	54	15	54	21	49	73	69	16	31	35	37	35	6	24	41	0	35	NA	NA	NA	NA	29	3
ANKRD50	0	0	1429	NA	131	66	67	73	34	85	84	105	55	55	167	67	26	32	51	125	71	18	25	92	0	51	NA	NA	NA	NA	45	3
ANKRD52	0	0	1076	NA	144	51	52	62	32	55	27	79	52	31	151	39	17	25	42	69	60	5	23	60	0	42	NA	NA	NA	NA	38	2
ANKRD53	0	0	530	NA	49	38	18	27	8	22	28	27	22	16	49	30	14	17	46	36	34	11	12	26	0	46	NA	NA	NA	NA	42	2
ANKRD54	0	0	300	NA	35	26	8	23	7	20	17	27	12	6	40	9	5	5	13	17	14	1	2	13	0	13	NA	NA	NA	NA	13	0
ANKRD55	3	1	614	PPP:328:330	46	37	36	38	14	33	36	28	27	23	64	30	14	14	40	56	35	6	9	28	3	37	328	0.534202	330	0.537459	31	3
ANKRD56	0	0	793	NA	90	71	16	34	10	51	38	65	22	12	80	38	1	14	78	82	23	16	10	42	0	78	NA	NA	NA	NA	64	7
ANKRD57	0	0	525	NA	55	41	9	27	5	42	13	67	23	10	47	23	5	11	44	46	15	7	6	29	0	44	NA	NA	NA	NA	36	4
ANKRD58	0	0	315	NA	47	34	5	10	4	22	7	33	14	4	39	5	5	5	18	27	14	7	4	11	0	18	NA	NA	NA	NA	18	0
ANKRD6	4	2	727	PPPP:382:385 PPP:645:647	81	52	34	31	15	51	52	38	27	18	71	55	9	8	34	54	45	3	8	41	7	27	382	0.525447	647	0.889959	23	2
ANKRD60	0	0	345	NA	39	33	7	19	8	17	10	34	16	11	38	11	11	9	15	23	15	5	4	20	0	15	NA	NA	NA	NA	15	0
ANKRD61	0	0	418	NA	36	23	29	12	13	17	16	24	14	30	57	18	11	4	19	27	32	3	15	18	0	19	NA	NA	NA	NA	19	0
ANKRD62	0	0	903	NA	50	57	58	57	22	99	67	27	21	42	96	87	26	15	9	65	41	4	21	39	0	9	NA	NA	NA	NA	9	0
ANKRD63	0	0	380	NA	61	44	8	12	5	22	13	44	8	4	45	4	6	7	34	27	13	4	0	19	0	34	NA	NA	NA	NA	30	2
ANKRD7	0	0	274	NA	17	12	18	16	7	14	14	11	7	11	38	27	5	8	9	16	10	2	12	20	0	9	NA	NA	NA	NA	7	1
ANKRD9	0	0	317	NA	47	36	1	15	6	16	11	32	7	3	49	4	3	11	28	16	8	5	7	12	0	28	NA	NA	NA	NA	22	3
ANKS1A	4	3	1134	PPP:319:321 PPPP:407:410 PPP:413:415	89	56	35	68	17	80	55	87	43	40	118	66	19	19	74	121	58	8	23	58	10	64	319	0.281305	415	0.365961	48	8
ANKS1B	0	0	1248	NA	71	57	67	64	22	96	49	77	46	68	118	75	23	28	78	121	82	11	28	67	0	78	NA	NA	NA	NA	62	8
ANKS3	0	0	656	NA	66	44	15	31	16	60	39	45	16	19	73	25	15	11	36	63	26	8	15	33	0	36	NA	NA	NA	NA	26	5
ANKS4B	0	0	417	NA	32	23	20	31	6	43	23	26	10	16	44	29	6	17	15	37	16	3	4	16	0	15	NA	NA	NA	NA	15	0
ANKS6	0	0	872	NA	89	50	30	47	5	48	33	83	31	17	95	42	16	19	69	85	48	8	6	51	0	69	NA	NA	NA	NA	59	5
ANKUB1	0	0	544	NA	42	21	12	22	15	26	24	25	15	24	61	50	11	24	26	47	31	10	19	39	0	26	NA	NA	NA	NA	24	1
ANKZF1	0	0	726	NA	78	74	13	37	12	63	48	48	18	10	79	33	5	24	50	54	34	6	12	28	0	50	NA	NA	NA	NA	44	3
ANLN	0	0	1124	NA	74	64	51	58	24	90	59	46	11	48	96	92	18	28	65	140	79	9	12	60	0	65	NA	NA	NA	NA	63	1
ANO1	0	0	986	NA	62	60	39	51	18	68	27	48	25	68	88	73	32	52	49	55	44	15	46	66	0	49	NA	NA	NA	NA	41	4
ANO10	0	0	660	NA	47	28	27	23	9	49	24	28	9	41	91	44	21	42	24	36	30	11	33	43	0	24	NA	NA	NA	NA	24	0
ANO2	0	0	1003	NA	66	52	41	47	14	76	41	65	22	62	94	60	27	60	53	74	43	14	38	54	0	53	NA	NA	NA	NA	51	1
ANO3	0	0	981	NA	56	53	48	39	19	60	36	48	24	77	91	63	30	63	43	69	43	25	51	43	0	43	NA	NA	NA	NA	39	2
ANO4	0	0	955	NA	58	65	42	42	20	68	32	52	23	68	89	53	26	60	43	54	39	22	46	53	0	43	NA	NA	NA	NA	41	1
ANO5	0	0	913	NA	48	47	37	38	13	69	33	35	18	58	90	54	27	70	41	60	53	18	49	55	0	41	NA	NA	NA	NA	37	2
ANO6	0	0	931	NA	47	48	45	42	19	61	35	44	20	78	83	59	24	58	46	50	49	19	46	58	0	46	NA	NA	NA	NA	42	2
ANO7	0	0	933	NA	96	64	26	41	21	52	38	54	22	33	108	33	16	55	50	56	42	26	32	68	0	50	NA	NA	NA	NA	42	4
ANO7L1	0	0	101	NA	10	6	2	4	5	2	5	10	2	4	11	2	1	6	7	7	5	2	0	9	0	7	NA	NA	NA	NA	7	0
ANO8	4	5	1232	PPP:21:23 PPP:1008:1010 PPPP:1132:1135 PPP:1181:1183 PPPP:1198:1201	114	99	20	44	22	123	54	115	23	34	129	43	20	52	109	79	42	20	27	63	17	92	21	0.0170455	1201	0.974838	74	9
ANO9	0	0	782	NA	52	56	21	30	16	51	29	38	22	45	87	31	25	52	36	43	43	17	25	63	0	36	NA	NA	NA	NA	32	2
ANP32A	0	0	249	NA	5	11	16	32	2	57	3	17	2	5	32	16	2	4	7	12	8	0	6	12	0	7	NA	NA	NA	NA	7	0
ANP32B	0	0	251	NA	6	10	13	38	3	56	2	16	2	6	33	17	3	7	7	11	7	0	3	11	0	7	NA	NA	NA	NA	7	0
ANP32D	0	0	131	NA	3	3	15	5	2	16	1	6	2	7	27	12	2	3	4	10	7	1	1	4	0	4	NA	NA	NA	NA	4	0
ANP32E	0	0	268	NA	8	8	17	31	4	71	5	18	0	9	34	14	4	5	6	14	6	0	6	8	0	6	NA	NA	NA	NA	4	1
ANPEP	0	0	967	NA	70	40	71	48	7	61	40	46	17	49	95	45	19	42	46	78	64	25	40	64	0	46	NA	NA	NA	NA	44	1
ANTXR1	5	8	564	PPPP:355:358 PPP:506:508 PPPP:514:517 PPPPP:522:526 PPPP:541:544 PPP:547:549 PPP:553:555 PPP:558:560	39	35	21	24	12	38	18	40	11	33	50	28	10	22	59	39	25	9	19	32	29	30	355	0.629433	560	0.992908	26	2
ANTXR2	5	1	489	PPPPP:352:356	31	25	12	15	11	39	19	42	2	33	52	30	7	14	36	39	22	11	11	38	5	31	352	0.719836	356	0.728016	27	2
ANXA1	0	0	346	NA	33	19	13	26	4	26	13	20	5	21	34	32	9	11	8	19	22	1	11	19	0	8	NA	NA	NA	NA	8	0
ANXA10	3	1	324	PPP:89:91	27	17	14	24	10	19	21	21	9	22	30	13	18	15	8	12	12	2	19	11	3	5	89	0.274691	91	0.280864	5	0
ANXA11	4	4	505	PPPP:7:10 PPPP:29:32 PPP:107:109 PPP:134:136	39	27	18	25	6	25	23	57	4	23	37	24	17	15	63	34	23	1	25	19	14	49	7	0.0138614	136	0.269307	25	12
ANXA13	0	0	357	NA	31	20	10	27	4	32	23	25	3	16	38	32	5	8	9	27	18	1	12	16	0	9	NA	NA	NA	NA	9	0
ANXA2	0	0	357	NA	25	22	10	31	5	22	14	23	4	23	35	35	10	8	7	27	18	1	19	18	0	7	NA	NA	NA	NA	5	1
ANXA3	0	0	323	NA	23	19	7	30	3	22	11	22	7	24	35	26	6	11	6	24	20	2	12	13	0	6	NA	NA	NA	NA	4	1
ANXA4	0	0	321	NA	24	24	8	28	4	21	14	25	3	19	31	22	12	10	2	24	19	1	13	17	0	2	NA	NA	NA	NA	2	0
ANXA5	0	0	320	NA	26	19	6	25	1	29	12	22	3	18	38	22	8	13	5	21	23	1	12	16	0	5	NA	NA	NA	NA	5	0
ANXA6	0	0	673	NA	58	42	15	57	6	55	27	45	13	47	66	52	21	25	15	40	38	2	23	26	0	15	NA	NA	NA	NA	11	2
ANXA7	0	0	488	NA	38	27	12	22	5	23	34	58	2	21	31	14	16	20	49	41	24	1	29	21	0	49	NA	NA	NA	NA	31	9
ANXA8	0	0	327	NA	23	15	9	20	4	29	12	21	6	23	33	27	11	9	6	28	21	3	14	13	0	6	NA	NA	NA	NA	4	1
ANXA8L1	0	0	327	NA	23	15	9	20	4	29	13	21	6	23	33	26	11	9	6	28	21	3	14	13	0	6	NA	NA	NA	NA	4	1
ANXA8L2	0	0	327	NA	25	15	10	20	4	29	12	20	6	23	33	26	11	9	6	27	21	3	14	13	0	6	NA	NA	NA	NA	4	1
ANXA9	0	0	345	NA	35	24	10	21	4	22	30	18	5	17	46	13	5	11	9	25	21	2	7	20	0	9	NA	NA	NA	NA	7	1
AOAH	0	0	686	NA	26	34	36	31	25	28	32	42	21	37	79	45	13	24	40	66	37	20	18	32	0	40	NA	NA	NA	NA	40	0
AOC2	3	2	756	PPP:114:116 PPP:288:290	56	44	26	30	8	35	35	63	32	25	92	14	8	38	60	57	30	13	27	63	6	54	114	0.150794	290	0.383598	46	4
AOC3	3	1	763	PPP:118:120	64	41	26	34	10	35	38	64	28	23	77	14	13	47	58	54	36	14	30	57	3	55	118	0.154653	120	0.157274	49	3
AOX1	0	0	1338	NA	93	57	54	55	42	90	51	109	39	89	124	83	43	52	71	83	64	10	40	89	0	71	NA	NA	NA	NA	67	2
AP1AR	0	0	302	NA	15	23	15	22	6	38	15	20	5	7	27	17	7	7	8	34	16	3	8	9	0	8	NA	NA	NA	NA	8	0
AP1B1	0	0	949	NA	81	30	43	58	16	66	40	43	10	51	118	62	25	27	56	62	50	6	27	78	0	56	NA	NA	NA	NA	42	7
AP1G1	3	1	845	PPP:637:639	60	45	47	40	16	50	39	39	16	54	103	42	30	23	42	60	59	3	22	55	3	39	637	0.753846	639	0.756213	35	2
AP1G2	4	1	785	PPPP:661:664	70	53	25	38	15	52	43	37	29	39	120	23	16	18	46	49	39	3	14	56	4	42	661	0.842038	664	0.84586	34	4
AP1M1	0	0	435	NA	15	22	19	17	3	38	11	28	11	30	36	33	12	21	21	36	18	7	18	39	0	21	NA	NA	NA	NA	15	3
AP1M2	0	0	423	NA	16	20	16	16	2	35	14	24	7	29	38	33	9	23	20	41	17	5	16	42	0	20	NA	NA	NA	NA	14	3
AP1S1	0	0	191	NA	12	18	2	10	5	16	8	13	1	7	24	16	6	9	11	9	3	3	7	10	0	11	NA	NA	NA	NA	7	2
AP1S2	0	0	202	NA	19	10	3	9	5	15	10	9	4	11	22	19	5	13	11	10	8	2	9	8	0	11	NA	NA	NA	NA	7	2
AP1S3	0	0	164	NA	6	12	5	9	6	15	6	6	4	17	19	13	2	9	3	10	6	2	7	7	0	3	NA	NA	NA	NA	3	0
AP2A1	3	2	977	PPP:269:271 PPP:667:669	96	47	45	49	19	56	47	51	16	46	119	55	19	38	61	68	42	5	27	71	6	55	269	0.275333	669	0.684749	41	7
AP2A2	3	2	940	PPP:269:271 PPP:675:677	76	45	46	45	16	56	45	46	17	51	110	51	15	40	51	74	52	5	25	74	6	45	269	0.28617	677	0.720213	39	3
AP2B1	0	0	951	NA	67	30	57	57	16	61	41	44	16	60	115	61	24	28	54	61	45	6	29	79	0	54	NA	NA	NA	NA	48	3
AP2M1	0	0	460	NA	26	29	21	18	6	30	21	28	7	37	30	38	13	23	19	37	19	6	14	38	0	19	NA	NA	NA	NA	15	2
AP2S1	0	0	142	NA	8	8	10	8	3	12	6	3	4	9	15	9	4	11	0	2	6	1	8	15	0	0	NA	NA	NA	NA	0	0
AP3B1	0	0	1094	NA	71	42	51	62	10	89	46	50	17	68	109	93	26	31	49	117	59	6	23	75	0	49	NA	NA	NA	NA	47	1
AP3B2	0	0	1101	NA	92	53	32	60	11	97	46	57	20	54	111	72	27	28	61	111	58	5	28	78	0	61	NA	NA	NA	NA	53	4
AP3D1	3	1	1215	PPP:879:881	88	56	38	73	20	101	60	45	32	64	125	119	31	28	70	102	51	6	29	77	3	67	879	0.723457	881	0.725103	61	3
AP3M1	0	0	418	NA	16	14	21	21	6	24	15	23	8	34	35	29	8	24	26	35	22	4	13	40	0	26	NA	NA	NA	NA	18	4
AP3M2	0	0	418	NA	15	16	18	20	4	23	16	24	10	30	35	27	11	23	27	31	30	4	12	42	0	27	NA	NA	NA	NA	19	4
AP3S1	0	0	193	NA	10	6	15	10	4	15	7	11	5	18	20	12	6	10	7	11	6	0	5	15	0	7	NA	NA	NA	NA	7	0
AP3S2	0	0	193	NA	9	9	14	9	4	16	10	11	5	18	21	8	5	11	6	9	4	0	6	18	0	6	NA	NA	NA	NA	6	0
AP4B1	0	0	739	NA	49	39	25	36	24	55	38	37	16	35	100	36	20	23	37	46	30	8	23	62	0	37	NA	NA	NA	NA	37	0
AP4E1	0	0	1137	NA	70	29	42	48	21	90	53	52	32	57	155	81	29	42	43	111	61	9	37	75	0	43	NA	NA	NA	NA	39	2
AP4M1	0	0	460	NA	18	34	9	21	5	26	20	40	14	14	66	13	6	21	29	58	15	3	11	37	0	29	NA	NA	NA	NA	23	3
AP4S1	0	0	159	NA	6	5	7	7	4	14	8	4	4	11	11	9	4	13	6	16	9	1	9	11	0	6	NA	NA	NA	NA	6	0
APAF1	0	0	1248	NA	65	47	52	86	41	78	58	64	48	66	139	89	26	50	30	102	63	26	31	87	0	30	NA	NA	NA	NA	30	0
APBA1	0	0	837	NA	75	52	25	53	8	91	51	58	27	49	53	33	24	13	51	67	31	2	29	45	0	51	NA	NA	NA	NA	45	3
APBA2	0	0	749	NA	51	33	32	43	15	79	40	57	23	47	53	35	22	11	54	59	30	3	22	40	0	54	NA	NA	NA	NA	50	2
APBA3	0	0	575	NA	55	34	7	32	12	47	26	51	21	27	60	7	12	9	54	46	29	4	9	33	0	54	NA	NA	NA	NA	42	6
APBB1	0	0	710	NA	69	35	27	30	13	67	34	54	20	16	70	25	13	19	59	67	31	15	9	37	0	59	NA	NA	NA	NA	49	5
APBB1IP	8	10	666	PPP:32:34 PPPP:129:132 PPPPP:142:146 PPPPP:517:521 PPPPPPPP:555:562 PPPPP:569:573 PPP:578:580 PPPPP:584:588 PPPPPPPP:599:606 PPP:619:621	56	23	28	44	8	47	31	38	13	20	59	51	12	19	87	42	30	5	21	32	49	38	32	0.048048	621	0.932432	30	4
APBB2	5	1	759	PPPPP:722:726	57	37	45	51	16	46	32	38	17	31	60	46	16	16	57	71	48	12	11	52	5	52	722	0.951252	726	0.956522	44	4
APBB3	0	0	493	NA	50	26	8	29	16	23	22	45	12	18	49	19	15	12	35	45	17	14	8	30	0	35	NA	NA	NA	NA	29	3
APC	5	2	2843	PPPPP:1439:1443 PPP:1602:1604	177	163	158	148	38	209	154	147	67	115	205	199	57	47	179	436	167	14	50	113	8	171	1439	0.506155	1604	0.564193	153	9
APC2	3	3	2303	PPP:1559:1561 PPP:1941:1943 PPP:2181:2183	300	208	33	92	38	161	100	175	45	44	226	78	28	32	239	248	110	14	24	108	9	230	1559	0.676943	2183	0.947894	186	22
APCDD1	0	0	565	NA	40	50	22	20	18	34	24	47	33	23	51	17	11	19	32	37	27	11	22	27	0	32	NA	NA	NA	NA	24	4
APCDD1L	3	1	512	PPP:282:284	43	48	6	16	13	26	20	43	26	11	58	6	6	18	55	31	32	10	15	29	3	52	282	0.550781	284	0.554688	42	5
APCS	0	0	223	NA	10	9	9	9	2	14	9	15	4	14	25	12	2	11	13	19	9	6	12	19	0	13	NA	NA	NA	NA	11	1
APEH	3	1	737	PPP:470:472	45	36	16	39	19	47	37	57	18	23	77	28	16	31	48	66	29	15	22	68	3	45	470	0.63772	472	0.640434	41	2
APEX1	0	0	318	NA	27	17	11	19	7	24	10	25	6	8	37	29	3	9	21	20	11	7	12	15	0	21	NA	NA	NA	NA	19	1
APEX2	0	0	518	NA	38	37	20	22	18	30	26	35	10	15	52	23	9	21	39	41	29	7	11	35	0	39	NA	NA	NA	NA	35	2
APH1A	0	0	265	NA	28	15	2	10	3	7	5	23	4	18	38	3	4	21	9	23	10	6	10	26	0	9	NA	NA	NA	NA	7	1
APH1B	0	0	257	NA	22	7	6	6	5	5	6	22	3	22	38	11	7	26	7	21	11	5	10	17	0	7	NA	NA	NA	NA	7	0
API5	0	0	524	NA	31	28	23	26	6	44	30	35	5	23	69	42	6	25	24	30	30	2	14	31	0	24	NA	NA	NA	NA	16	4
APIP	0	0	259	NA	16	11	5	13	7	17	9	21	9	18	17	21	12	8	14	15	12	5	12	17	0	14	NA	NA	NA	NA	14	0
APITD1	0	0	164	NA	19	15	4	4	5	19	12	5	3	5	12	9	5	10	4	12	10	4	2	5	0	4	NA	NA	NA	NA	2	1
APLF	0	0	511	NA	19	24	33	33	12	51	29	34	13	24	39	33	9	10	32	52	29	3	11	21	0	32	NA	NA	NA	NA	32	0
APLN	0	0	122	NA	9	10	1	4	8	3	6	14	4	3	13	1	2	3	15	16	4	3	0	3	0	15	NA	NA	NA	NA	13	1
APLNR	0	0	380	NA	27	20	10	15	14	14	8	26	6	15	41	10	14	24	14	34	27	9	20	32	0	14	NA	NA	NA	NA	14	0
APLP1	3	2	651	PPP:211:213 PPP:271:273	52	57	10	26	12	67	46	51	22	16	70	14	16	14	61	43	23	4	11	36	6	55	211	0.324117	273	0.419355	45	5
APLP2	0	0	763	NA	58	38	28	45	18	99	38	38	23	31	59	42	27	24	37	33	38	5	26	56	0	37	NA	NA	NA	NA	31	3
APOA1	0	0	267	NA	23	17	5	16	0	30	19	11	6	0	41	22	4	8	10	16	12	5	7	15	0	10	NA	NA	NA	NA	8	1
APOA1BP	0	0	306	NA	24	18	7	12	7	15	13	29	3	14	32	14	7	11	26	22	16	5	12	19	0	26	NA	NA	NA	NA	18	4
APOA2	0	0	100	NA	8	2	1	2	2	10	7	4	0	2	15	10	2	4	4	7	8	0	4	8	0	4	NA	NA	NA	NA	4	0
APOA4	0	0	396	NA	36	26	15	19	0	49	43	16	8	5	56	28	6	12	12	19	15	1	7	23	0	12	NA	NA	NA	NA	12	0
APOA5	4	1	366	PPPP:316:319	37	26	5	18	1	31	37	22	14	6	48	15	9	11	19	22	15	5	5	20	4	15	316	0.863388	319	0.871585	15	0
APOB	0	0	4563	NA	276	150	245	234	24	297	231	207	114	287	536	356	79	224	171	393	299	37	153	250	0	171	NA	NA	NA	NA	161	5
APOBEC1	0	0	236	NA	8	19	9	7	8	13	9	9	12	15	23	8	7	11	17	18	12	12	9	10	0	17	NA	NA	NA	NA	9	4
APOBEC2	0	0	224	NA	24	9	10	9	4	29	12	10	2	10	22	17	3	14	10	9	7	4	8	11	0	10	NA	NA	NA	NA	8	1
APOBEC3A	0	0	199	NA	14	14	9	13	6	9	12	14	10	8	20	5	5	12	9	11	7	5	8	8	0	9	NA	NA	NA	NA	9	0
APOBEC3B	5	2	490	PPPPP:391:395 PPP:434:436	28	37	17	21	20	29	20	23	10	15	55	10	11	31	43	34	21	15	28	22	8	35	391	0.797959	436	0.889796	29	3
APOBEC3C	0	0	190	NA	8	13	13	8	8	14	8	7	3	5	14	10	4	14	9	11	11	8	11	11	0	9	NA	NA	NA	NA	9	0
APOBEC3D	0	0	386	NA	18	32	24	17	17	25	10	14	12	12	32	19	10	29	19	19	18	16	21	22	0	19	NA	NA	NA	NA	19	0
APOBEC3F	0	0	373	NA	21	25	19	17	15	28	10	12	12	11	28	19	9	29	20	21	17	15	26	19	0	20	NA	NA	NA	NA	20	0
APOBEC3G	0	0	384	NA	15	30	16	22	15	24	17	14	16	15	32	20	11	27	20	20	21	14	20	15	0	20	NA	NA	NA	NA	16	2
APOBEC3H	0	0	200	NA	11	15	9	8	11	13	9	9	5	9	21	15	5	10	11	9	8	4	10	8	0	11	NA	NA	NA	NA	11	0
APOBEC4	0	0	367	NA	19	15	23	10	7	21	15	21	14	22	33	18	10	19	28	33	20	4	18	17	0	28	NA	NA	NA	NA	24	2
APOBR	0	0	1088	NA	140	81	8	42	8	201	53	155	17	8	69	24	15	9	58	71	53	19	5	52	0	58	NA	NA	NA	NA	54	2
APOC1	0	0	83	NA	5	4	1	4	0	8	3	3	0	4	12	9	2	4	4	9	3	1	0	7	0	4	NA	NA	NA	NA	4	0
APOC2	0	0	101	NA	7	2	1	4	0	8	8	5	0	1	15	6	3	4	5	9	10	1	5	7	0	5	NA	NA	NA	NA	5	0
APOC3	0	0	117	NA	17	7	1	7	1	5	6	6	2	0	12	6	4	4	5	12	7	4	2	9	0	5	NA	NA	NA	NA	5	0
APOC4	3	1	127	PPP:38:40	6	10	2	7	6	5	6	8	2	1	21	8	4	4	8	9	7	5	2	6	3	5	38	0.299213	40	0.314961	5	0
APOD	0	0	215	NA	14	5	16	8	7	13	9	9	2	12	25	13	6	9	16	15	11	4	8	13	0	16	NA	NA	NA	NA	10	3
APOE	0	0	317	NA	39	34	1	11	2	40	32	18	2	2	41	13	8	4	8	14	12	8	4	24	0	8	NA	NA	NA	NA	8	0
APOF	0	0	326	NA	29	15	9	14	6	18	22	28	6	12	48	10	9	6	17	27	17	3	12	18	0	17	NA	NA	NA	NA	17	0
APOH	3	1	345	PPP:143:145	19	10	14	14	23	20	4	23	6	16	20	30	5	20	32	23	27	5	14	20	3	29	143	0.414493	145	0.42029	29	0
APOL1	0	0	414	NA	36	24	19	20	2	35	16	29	7	19	51	26	10	12	14	31	20	7	7	29	0	14	NA	NA	NA	NA	14	0
APOL2	3	1	449	PPP:353:355	41	28	20	21	3	37	25	42	10	17	50	21	9	9	23	28	22	7	5	31	3	20	353	0.786192	355	0.790646	18	1
APOL3	0	0	402	NA	47	30	11	8	7	35	18	27	8	21	39	16	4	16	8	36	32	5	11	23	0	8	NA	NA	NA	NA	8	0
APOL4	0	0	350	NA	35	23	12	13	2	28	16	18	7	24	37	20	4	11	10	22	23	7	5	33	0	10	NA	NA	NA	NA	10	0
APOL5	0	0	433	NA	42	25	17	11	7	28	17	40	13	11	45	26	16	14	25	35	23	8	4	26	0	25	NA	NA	NA	NA	23	1
APOL6	0	0	343	NA	38	23	10	19	6	29	13	23	3	8	43	29	6	8	6	18	26	6	8	21	0	6	NA	NA	NA	NA	6	0
APOLD1	0	0	279	NA	30	35	4	9	11	14	13	26	4	10	38	8	3	12	7	23	12	2	2	16	0	7	NA	NA	NA	NA	7	0
APOM	0	0	188	NA	12	8	8	7	6	14	8	13	6	9	21	8	6	10	12	12	12	3	7	6	0	12	NA	NA	NA	NA	10	1
APOO	0	0	198	NA	11	7	5	6	2	11	13	16	1	8	21	16	3	8	15	18	6	4	13	14	0	15	NA	NA	NA	NA	9	3
APOOL	0	0	268	NA	21	5	2	7	3	14	12	19	6	13	20	30	9	7	19	26	21	2	11	21	0	19	NA	NA	NA	NA	15	2
APP	0	0	770	NA	63	37	31	50	18	92	36	38	25	24	56	41	24	21	35	35	50	9	20	65	0	35	NA	NA	NA	NA	33	1
APPBP2	0	0	585	NA	53	26	22	28	15	45	29	30	26	29	69	40	8	23	7	41	14	5	35	40	0	7	NA	NA	NA	NA	7	0
APPL1	0	0	709	NA	48	38	30	41	12	62	48	34	14	36	65	43	18	27	27	71	40	2	18	35	0	27	NA	NA	NA	NA	25	1
APPL2	0	0	670	NA	54	29	35	35	10	62	46	30	9	34	71	37	22	26	25	48	39	2	17	39	0	25	NA	NA	NA	NA	25	0
APRT	0	0	180	NA	16	12	1	9	3	13	7	17	2	7	29	8	2	8	11	11	6	1	4	13	0	11	NA	NA	NA	NA	11	0
APTX	0	0	356	NA	15	20	11	15	7	26	22	20	17	16	32	33	10	7	18	28	10	7	8	34	0	18	NA	NA	NA	NA	18	0
AQP1	0	0	329	NA	25	16	14	20	8	9	14	30	6	28	42	6	3	13	12	26	21	5	8	23	0	12	NA	NA	NA	NA	10	1
AQP10	0	0	301	NA	36	8	11	5	5	11	11	32	6	12	44	6	9	12	19	14	18	5	9	28	0	19	NA	NA	NA	NA	19	0
AQP11	0	0	271	NA	22	10	6	3	10	10	11	14	13	8	51	5	11	19	11	21	17	4	5	20	0	11	NA	NA	NA	NA	11	0
AQP12A	0	0	307	NA	42	13	5	5	9	12	12	26	10	0	51	6	7	17	20	23	18	4	7	20	0	20	NA	NA	NA	NA	18	1
AQP12B	0	0	307	NA	42	13	5	5	8	13	11	26	10	0	51	6	6	18	19	23	20	4	7	20	0	19	NA	NA	NA	NA	17	1
AQP2	0	0	271	NA	35	13	7	7	4	12	8	24	8	12	40	4	3	14	14	19	14	5	4	24	0	14	NA	NA	NA	NA	12	1
AQP3	3	1	292	PPP:272:274	27	10	11	6	6	10	11	34	9	19	34	5	7	20	15	13	15	6	8	26	3	12	272	0.931507	274	0.938356	12	0
AQP4	0	0	323	NA	28	11	9	11	8	14	8	34	7	26	26	15	10	17	12	21	19	7	7	33	0	12	NA	NA	NA	NA	10	1
AQP5	0	0	265	NA	34	10	11	3	3	11	8	23	3	17	36	7	5	17	13	17	15	4	6	22	0	13	NA	NA	NA	NA	13	0
AQP6	0	0	282	NA	38	10	6	4	3	9	8	30	5	15	32	6	9	13	13	20	20	6	4	31	0	13	NA	NA	NA	NA	13	0
AQP7	0	0	342	NA	29	13	12	5	2	13	8	35	11	21	35	9	15	19	21	24	19	8	11	32	0	21	NA	NA	NA	NA	17	2
AQP8	0	0	261	NA	32	9	10	4	6	12	6	34	4	16	38	6	7	12	13	12	9	7	3	21	0	13	NA	NA	NA	NA	13	0
AQP9	0	0	295	NA	33	9	9	6	4	13	6	34	4	25	32	11	9	21	14	18	9	4	8	26	0	14	NA	NA	NA	NA	14	0
AQR	0	0	1485	NA	85	87	72	71	19	121	73	64	42	91	152	79	39	78	88	71	93	15	53	92	0	88	NA	NA	NA	NA	80	4
AR	8	1	920	PPPPPPPP:374:381	81	41	20	37	27	55	71	96	19	23	87	40	22	28	74	81	37	8	33	40	8	66	374	0.406522	381	0.41413	54	6
ARAF	0	0	606	NA	39	42	18	30	14	26	32	40	20	22	55	30	16	26	43	53	34	6	16	44	0	43	NA	NA	NA	NA	37	3
ARAP1	3	3	1450	PPP:208:210 PPP:252:254 PPP:807:809	114	108	30	67	29	130	58	93	37	45	155	62	25	49	118	101	74	23	36	96	9	109	208	0.143448	809	0.557931	69	20
ARAP2	0	0	1704	NA	93	77	81	95	31	135	73	76	41	108	160	151	24	71	67	170	88	24	46	93	0	67	NA	NA	NA	NA	57	5
ARAP3	3	3	1544	PPP:135:137 PPP:742:744 PPP:1465:1467	109	113	26	70	31	105	83	123	29	46	185	57	22	56	143	133	88	24	25	76	9	134	135	0.0874352	1467	0.95013	106	14
ARC	3	1	396	PPP:176:178	23	27	7	18	5	45	28	30	13	11	36	21	5	8	29	23	16	10	15	26	3	26	176	0.444444	178	0.449495	26	0
ARCN1	0	0	552	NA	34	29	30	27	10	51	19	35	9	34	46	39	16	23	26	39	33	3	10	39	0	26	NA	NA	NA	NA	24	1
AREG	0	0	274	NA	19	11	11	15	8	20	8	17	8	16	14	21	7	10	16	32	10	1	11	19	0	16	NA	NA	NA	NA	12	2
AREGB	0	0	252	NA	19	14	12	11	6	24	9	17	6	12	14	21	6	6	14	27	8	0	10	16	0	14	NA	NA	NA	NA	10	2
ARF1	0	0	181	NA	12	11	13	11	1	12	7	14	3	11	22	11	6	8	3	5	11	4	5	11	0	3	NA	NA	NA	NA	3	0
ARF3	4	1	210	PPPP:138:141	6	13	9	10	1	14	6	19	3	10	24	13	6	10	12	19	13	2	4	16	4	8	138	0.657143	141	0.671429	8	0
ARF4	0	0	180	NA	9	10	8	11	2	10	10	13	1	11	25	11	6	7	3	8	14	4	5	12	0	3	NA	NA	NA	NA	3	0
ARF5	0	0	180	NA	9	10	6	12	2	10	11	13	3	9	22	11	6	7	4	8	14	4	5	14	0	4	NA	NA	NA	NA	4	0
ARF6	0	0	175	NA	8	12	8	13	2	8	7	14	3	14	17	13	5	5	5	6	13	4	7	11	0	5	NA	NA	NA	NA	5	0
ARFGAP1	3	1	414	PPP:190:192	29	19	21	25	6	29	21	37	7	5	21	27	5	19	22	53	21	16	7	24	3	19	190	0.458937	192	0.463768	15	2
ARFGAP2	0	0	521	NA	56	30	19	26	6	38	30	39	9	17	36	36	13	19	22	63	22	7	8	25	0	22	NA	NA	NA	NA	18	2
ARFGAP3	3	1	516	PPP:144:146	37	24	22	34	9	33	23	29	7	19	32	43	10	19	24	74	27	7	14	29	3	21	144	0.27907	146	0.282946	19	1
ARFGEF1	4	1	1849	PPPP:1551:1554	123	79	83	101	39	138	110	84	44	121	183	116	45	85	71	145	112	20	42	108	4	67	1551	0.838832	1554	0.840454	57	5
ARFGEF2	0	0	1785	NA	126	89	69	94	44	134	104	82	45	110	179	110	49	81	60	139	99	22	39	110	0	60	NA	NA	NA	NA	54	3
ARFIP1	0	0	373	NA	29	15	20	19	1	30	25	20	10	18	44	30	6	13	15	27	22	2	8	19	0	15	NA	NA	NA	NA	13	1
ARFIP2	0	0	341	NA	24	17	12	16	2	31	22	32	8	13	43	23	6	11	12	20	23	2	10	14	0	12	NA	NA	NA	NA	10	1
ARFRP1	0	0	201	NA	10	10	6	12	8	13	8	15	2	11	20	16	5	6	4	12	16	3	8	16	0	4	NA	NA	NA	NA	2	1
ARG1	0	0	330	NA	16	13	10	19	3	19	6	36	8	24	35	24	4	10	23	20	23	2	9	26	0	23	NA	NA	NA	NA	21	1
ARG2	0	0	354	NA	24	20	11	23	5	17	14	28	13	23	38	13	5	11	21	32	18	2	8	28	0	21	NA	NA	NA	NA	19	1
ARGFX	0	0	315	NA	20	16	16	14	3	15	24	8	3	10	28	13	7	17	28	43	21	5	12	12	0	28	NA	NA	NA	NA	24	2
ARGLU1	0	0	273	NA	15	53	5	7	0	54	17	4	3	13	17	33	3	3	3	28	6	0	0	9	0	3	NA	NA	NA	NA	1	1
ARHGAP1	0	0	458	NA	28	18	17	29	1	24	27	12	15	21	62	29	8	24	36	31	24	7	18	27	0	36	NA	NA	NA	NA	28	4
ARHGAP10	0	0	786	NA	46	44	35	37	11	71	34	39	21	36	71	61	18	42	50	63	42	7	17	41	0	50	NA	NA	NA	NA	38	6
ARHGAP11A	0	0	1023	NA	45	55	61	39	19	80	38	56	29	44	97	91	20	33	56	127	52	5	15	61	0	56	NA	NA	NA	NA	54	1
ARHGAP11B	0	0	267	NA	19	15	12	9	6	18	9	15	13	11	38	21	5	11	11	18	8	4	5	19	0	11	NA	NA	NA	NA	9	1
ARHGAP12	0	0	846	NA	32	43	49	49	6	66	53	47	18	44	63	72	8	29	46	89	47	14	26	45	0	46	NA	NA	NA	NA	36	5
ARHGAP15	3	1	475	PPP:399:401	20	27	23	24	4	34	25	20	17	32	44	46	12	20	16	47	24	6	7	27	3	13	399	0.84	401	0.844211	11	1
ARHGAP17	4	4	881	PPP:542:544 PPP:646:648 PPP:714:716 PPPP:810:813	78	40	34	36	7	56	54	56	32	24	77	51	20	23	107	78	50	7	9	42	13	94	542	0.61521	813	0.922815	64	15
ARHGAP18	0	0	663	NA	46	28	28	35	5	62	46	31	8	32	75	64	17	18	28	44	36	6	15	39	0	28	NA	NA	NA	NA	24	2
ARHGAP19	3	1	517	PPP:236:238	31	29	26	22	8	35	27	32	15	25	62	45	15	22	26	43	27	2	6	19	3	23	236	0.45648	238	0.460348	23	0
ARHGAP20	3	1	1191	PPP:1073:1075	64	60	55	64	27	75	55	56	27	47	122	86	25	39	76	156	62	13	26	56	3	73	1073	0.900924	1075	0.902603	67	3
ARHGAP21	3	1	1958	PPP:199:201	98	125	80	115	24	148	89	97	49	86	149	141	23	48	127	262	147	17	35	98	3	124	199	0.101634	201	0.102656	98	13
ARHGAP22	0	0	714	NA	48	60	16	31	10	57	33	61	14	19	77	33	16	17	55	78	29	10	11	39	0	55	NA	NA	NA	NA	51	2
ARHGAP23	3	2	1491	PPP:185:187 PPP:403:405	145	151	35	85	22	94	48	120	25	43	125	59	20	38	152	156	71	16	29	57	6	146	185	0.124078	405	0.27163	112	17
ARHGAP24	0	0	748	NA	25	39	53	41	11	59	42	50	14	22	62	55	24	27	36	78	43	9	15	43	0	36	NA	NA	NA	NA	32	2
ARHGAP25	0	0	646	NA	42	41	26	36	9	61	37	30	7	25	52	51	22	22	39	57	29	10	14	36	0	39	NA	NA	NA	NA	37	1
ARHGAP26	0	0	814	NA	44	39	39	36	13	72	35	31	23	39	79	59	23	39	43	84	44	6	17	49	0	43	NA	NA	NA	NA	39	2
ARHGAP27	3	1	889	PPP:211:213	85	66	16	46	12	78	37	57	23	21	72	30	8	27	91	75	43	18	26	58	3	88	211	0.237345	213	0.239595	72	8
ARHGAP28	3	1	722	PPP:99:101	55	47	28	38	5	61	26	30	15	32	69	59	21	31	39	65	38	7	11	45	3	36	99	0.137119	101	0.139889	28	4
ARHGAP29	0	0	1261	NA	72	61	71	63	27	114	60	51	27	62	134	106	27	51	64	122	62	7	17	63	0	64	NA	NA	NA	NA	58	3
ARHGAP30	0	0	1101	NA	94	74	19	57	20	138	50	114	18	26	92	48	16	21	92	107	27	9	18	61	0	92	NA	NA	NA	NA	76	8
ARHGAP31	4	3	1444	PPP:427:429 PPP:673:675 PPPP:785:788	87	71	45	55	24	132	75	94	31	48	128	82	22	37	150	179	78	14	15	77	10	140	427	0.295706	788	0.545706	116	12
ARHGAP32	6	4	2087	PPP:490:492 PPPPPP:1031:1036 PPPP:1307:1310 PPP:1979:1981	148	109	68	102	30	146	106	110	81	61	155	109	46	59	190	242	111	12	69	133	16	174	490	0.234787	1981	0.949209	134	20
ARHGAP33	5	7	1287	PPPP:126:129 PPP:433:435 PPPP:876:879 PPPPP:889:893 PPP:951:953 PPP:966:968 PPPP:1266:1269	107	108	18	45	23	67	51	122	30	20	141	22	16	38	189	151	44	14	24	57	26	163	126	0.0979021	1269	0.986014	121	21
ARHGAP35	3	2	1513	PPP:1038:1040 PPP:1477:1479	74	82	70	89	27	116	71	63	43	89	147	108	30	63	94	131	74	11	43	88	6	88	1038	0.686054	1479	0.977528	82	3
ARHGAP36	0	0	547	NA	41	51	15	29	6	38	25	31	13	24	69	30	11	25	32	38	22	3	6	38	0	32	NA	NA	NA	NA	24	4
ARHGAP39	0	0	1114	NA	83	79	28	44	18	89	67	68	24	30	95	59	23	36	104	104	48	17	39	59	0	104	NA	NA	NA	NA	84	10
ARHGAP4	0	0	986	NA	85	75	17	39	18	92	64	67	27	14	118	41	16	27	67	82	43	10	20	64	0	67	NA	NA	NA	NA	49	9
ARHGAP40	0	0	622	NA	47	41	19	36	6	41	35	48	17	15	90	37	14	15	36	44	23	9	8	41	0	36	NA	NA	NA	NA	32	2
ARHGAP42	0	0	874	NA	51	44	33	38	13	72	43	45	17	50	77	70	21	36	47	96	44	7	29	41	0	47	NA	NA	NA	NA	39	4
ARHGAP44	3	1	818	PPP:739:741	73	35	22	33	11	59	54	44	16	30	86	49	26	17	81	82	40	7	15	38	3	78	739	0.903423	741	0.905868	62	8
ARHGAP5	4	4	1502	PPP:988:990 PPP:1037:1039 PPPP:1463:1466 PPP:1482:1484	73	71	76	102	26	114	75	55	45	89	137	125	26	68	89	99	86	9	50	87	13	76	988	0.65779	1484	0.988016	72	2
ARHGAP6	4	3	974	PPP:86:88 PPP:94:96 PPPP:880:883	76	66	26	57	13	60	56	69	17	26	103	50	13	25	78	133	39	13	14	40	10	68	86	0.0882957	883	0.906571	60	4
ARHGAP8	3	2	643	PPP:386:388 PPP:392:394	42	47	18	21	7	38	35	36	19	26	88	31	11	29	47	42	33	5	22	46	6	41	386	0.600311	394	0.612753	29	6
ARHGAP9	3	3	821	PPP:203:205 PPP:275:277 PPP:434:436	51	72	20	36	14	56	41	62	20	19	105	23	10	19	84	85	40	15	11	38	9	75	203	0.247259	436	0.53106	63	6
ARHGDIA	0	0	204	NA	13	9	6	15	1	22	8	11	3	10	16	19	4	5	10	15	10	3	9	15	0	10	NA	NA	NA	NA	8	1
ARHGDIB	3	1	201	PPP:26:28	7	6	5	18	1	21	4	11	5	6	18	23	5	5	14	10	15	3	8	16	3	11	26	0.129353	28	0.139303	11	0
ARHGDIG	0	0	225	NA	15	16	1	18	5	15	7	16	5	4	35	11	3	4	16	10	8	3	8	25	0	16	NA	NA	NA	NA	12	2
ARHGEF1	0	0	948	NA	65	82	17	50	15	89	42	65	30	24	113	42	20	29	83	74	39	11	7	51	0	83	NA	NA	NA	NA	65	9
ARHGEF10	0	0	1369	NA	99	67	48	73	21	114	66	82	39	58	129	77	38	34	89	130	61	15	33	96	0	89	NA	NA	NA	NA	77	6
ARHGEF10L	3	1	1279	PPP:6:8	96	71	27	74	28	88	62	88	31	51	150	61	27	35	96	109	58	17	22	88	3	93	6	0.00469116	8	0.00625489	83	5
ARHGEF11	6	3	1562	PPPPPP:151:156 PPP:158:160 PPPP:1134:1137	101	104	43	93	16	138	84	104	38	65	171	77	30	34	137	153	74	10	22	68	13	124	151	0.0966709	1137	0.727913	106	9
ARHGEF12	4	1	1544	PPPP:714:717	81	87	47	100	17	139	98	84	49	74	141	100	32	42	89	146	91	8	29	90	4	85	714	0.462435	717	0.464378	79	3
ARHGEF15	3	2	841	PPP:119:121 PPP:839:841	65	77	18	32	17	56	48	52	17	14	99	18	8	20	107	83	48	8	11	43	6	101	119	0.141498	841	1	73	14
ARHGEF16	0	0	709	NA	52	55	14	36	5	59	49	39	21	24	82	38	16	25	42	62	29	7	13	41	0	42	NA	NA	NA	NA	38	2
ARHGEF17	5	4	2063	PPP:171:173 PPP:894:896 PPP:1567:1569 PPPPP:1992:1996	172	159	29	110	37	148	87	180	45	52	195	68	36	48	212	236	97	22	27	103	14	198	171	0.082889	1996	0.967523	164	17
ARHGEF18	3	2	1173	PPP:1114:1116 PPP:1125:1127	91	93	34	53	8	111	80	77	20	42	130	67	19	34	81	106	50	8	19	50	6	75	1114	0.949702	1127	0.960784	59	8
ARHGEF19	0	0	802	NA	64	68	12	27	15	74	42	53	21	18	98	33	11	24	61	79	32	13	11	46	0	61	NA	NA	NA	NA	47	7
ARHGEF2	0	0	987	NA	70	97	25	50	22	95	54	55	21	36	123	43	20	28	51	78	54	4	16	45	0	51	NA	NA	NA	NA	45	3
ARHGEF25	0	0	619	NA	41	43	11	29	10	53	39	62	12	22	73	25	14	14	50	45	24	6	17	29	0	50	NA	NA	NA	NA	38	6
ARHGEF26	5	1	871	PPPPP:138:142	47	59	37	39	10	69	40	44	15	35	85	64	17	25	63	96	47	6	18	55	5	58	138	0.158439	142	0.163031	54	2
ARHGEF3	0	0	558	NA	23	41	29	34	16	44	37	24	12	23	64	34	10	19	26	57	24	6	9	26	0	26	NA	NA	NA	NA	24	1
ARHGEF33	0	0	870	NA	75	48	27	32	12	87	59	44	21	26	84	64	19	32	62	81	33	4	24	36	0	62	NA	NA	NA	NA	58	2
ARHGEF35	0	0	484	NA	34	22	8	22	7	86	40	43	11	13	40	15	9	8	35	43	18	6	5	19	0	35	NA	NA	NA	NA	31	2
ARHGEF37	3	1	675	PPP:483:485	47	44	24	29	7	51	53	35	15	23	96	32	7	19	40	44	31	7	21	50	3	37	483	0.715556	485	0.718519	37	0
ARHGEF38	0	0	777	NA	41	36	37	47	16	70	41	24	21	38	96	66	20	21	26	69	35	3	28	42	0	26	NA	NA	NA	NA	24	1
ARHGEF4	0	0	1014	NA	93	71	18	28	20	91	50	99	25	22	77	52	9	18	111	110	56	14	10	40	0	111	NA	NA	NA	NA	99	6
ARHGEF40	3	2	1519	PPP:561:563 PPP:1109:1111	143	122	15	50	30	145	83	145	40	28	199	42	15	33	146	107	62	18	19	77	6	140	561	0.369322	1111	0.731402	108	16
ARHGEF5	5	3	1597	PPPPP:726:730 PPP:759:761 PPP:851:853	106	112	42	61	21	162	104	95	45	41	139	55	25	44	162	184	80	19	23	77	11	151	726	0.454602	853	0.534126	117	17
ARHGEF6	0	0	776	NA	33	36	38	26	22	76	43	38	12	40	86	55	18	24	37	75	47	7	18	45	0	37	NA	NA	NA	NA	33	2
ARHGEF7	0	0	803	NA	36	37	36	33	16	59	39	39	23	29	95	51	18	21	52	89	60	10	22	38	0	52	NA	NA	NA	NA	42	5
ARHGEF9	3	1	516	PPP:469:471	27	34	24	43	10	41	34	22	13	32	42	35	16	26	20	25	12	12	19	29	3	17	469	0.908915	471	0.912791	15	1
ARID1A	6	10	2285	PPPPPP:16:21 PPP:144:146 PPP:223:225 PPP:251:253 PPP:598:600 PPP:885:887 PPP:1113:1115 PPP:1567:1569 PPP:1574:1576 PPP:1897:1899	193	87	93	78	16	102	219	247	45	55	138	75	90	42	296	248	103	13	78	67	33	263	16	0.00700219	1899	0.831072	191	36
ARID1B	5	6	2289	PPPPP:446:450 PPP:1202:1204 PPP:1635:1637 PPP:1639:1641 PPPP:1886:1889 PPP:2224:2226	199	82	77	89	19	102	203	259	65	61	134	82	100	41	270	276	74	14	70	72	21	249	446	0.194845	2226	0.972477	191	29
ARID2	3	4	1835	PPP:511:513 PPP:999:1001 PPP:1021:1023 PPP:1085:1087	124	60	86	67	29	77	171	124	51	93	132	81	34	48	157	189	120	9	27	156	12	145	511	0.278474	1087	0.592371	125	10
ARID3A	0	0	593	NA	73	34	18	25	1	59	36	63	7	15	48	23	19	13	56	44	25	3	10	21	0	56	NA	NA	NA	NA	38	9
ARID3B	0	0	560	NA	63	34	16	24	2	38	42	39	6	20	51	28	12	14	43	56	33	4	12	23	0	43	NA	NA	NA	NA	37	3
ARID3C	3	2	412	PPP:240:242 PPP:400:402	44	26	9	12	5	37	21	35	4	10	43	15	8	9	61	26	19	2	9	17	6	55	240	0.582524	402	0.975728	39	8
ARID4A	0	0	1257	NA	55	65	59	95	17	169	44	55	18	61	95	138	20	24	56	126	62	8	25	65	0	56	NA	NA	NA	NA	46	5
ARID4B	3	1	1312	PPP:987:989	65	59	66	95	19	178	40	56	19	53	80	152	16	26	67	144	63	9	26	79	3	64	987	0.752287	989	0.753811	54	5
ARID5A	0	0	638	NA	54	38	12	17	13	50	32	64	17	9	52	50	11	14	70	55	31	4	15	30	0	70	NA	NA	NA	NA	60	5
ARID5B	3	1	1188	PPP:713:715	74	54	46	55	20	86	58	66	47	45	111	107	19	36	97	130	48	6	34	49	3	94	713	0.600168	715	0.601852	88	3
ARIH1	0	0	557	NA	25	26	30	40	32	56	29	44	18	21	40	36	16	16	17	25	20	12	25	29	0	17	NA	NA	NA	NA	17	0
ARIH2	0	0	493	NA	30	28	24	30	28	47	34	16	19	14	37	28	12	15	20	30	17	9	27	28	0	20	NA	NA	NA	NA	18	1
ARL1	0	0	194	NA	12	9	5	9	4	12	8	14	3	12	18	11	8	9	4	15	14	4	6	17	0	4	NA	NA	NA	NA	4	0
ARL10	0	0	244	NA	20	16	4	16	0	27	7	20	3	6	38	9	3	10	16	11	6	10	2	20	0	16	NA	NA	NA	NA	14	1
ARL11	0	0	196	NA	18	11	6	10	4	14	7	16	5	2	31	10	5	3	10	15	9	4	3	13	0	10	NA	NA	NA	NA	10	0
ARL13A	0	0	290	NA	12	20	14	12	13	20	10	12	6	18	37	26	8	5	12	26	18	3	6	12	0	12	NA	NA	NA	NA	10	1
ARL13B	7	1	428	PPPPPPP:374:380	23	25	21	21	8	50	20	29	11	22	36	41	9	10	29	20	18	5	8	22	7	22	374	0.873832	380	0.88785	20	1
ARL14	0	0	192	NA	9	8	9	10	5	11	11	15	3	7	23	18	6	7	5	10	14	3	4	14	0	5	NA	NA	NA	NA	5	0
ARL15	3	1	204	PPP:26:28	16	10	7	14	7	13	9	10	4	10	27	12	4	8	11	18	6	2	7	9	3	8	26	0.127451	28	0.137255	8	0
ARL16	3	1	197	PPP:58:60	19	13	5	8	6	10	7	21	2	11	27	8	6	2	9	14	13	2	3	11	3	6	58	0.294416	60	0.304569	6	0
ARL17A	0	0	203	NA	11	7	6	4	4	6	7	20	9	8	22	15	5	11	13	25	10	6	4	10	0	13	NA	NA	NA	NA	13	0
ARL17B	0	0	177	NA	8	5	4	4	4	5	5	19	7	8	18	16	3	11	11	20	10	6	2	11	0	11	NA	NA	NA	NA	11	0
ARL2	0	0	184	NA	9	12	8	14	3	11	8	14	3	14	28	11	4	6	3	13	10	5	2	6	0	3	NA	NA	NA	NA	3	0
ARL2BP	0	0	163	NA	11	5	6	14	1	18	6	6	3	8	21	7	6	14	3	13	8	0	7	6	0	3	NA	NA	NA	NA	3	0
ARL3	0	0	182	NA	12	8	10	10	3	13	11	12	2	14	23	15	2	5	5	11	9	4	3	10	0	5	NA	NA	NA	NA	5	0
ARL4A	0	0	200	NA	5	10	9	9	3	13	9	14	5	13	23	18	5	8	6	15	15	3	2	15	0	6	NA	NA	NA	NA	6	0
ARL4C	0	0	201	NA	11	8	8	9	4	14	7	14	5	14	22	20	4	6	7	13	14	2	5	14	0	7	NA	NA	NA	NA	7	0
ARL4D	0	0	201	NA	20	17	4	7	1	14	10	18	5	5	24	14	3	7	7	11	10	2	3	19	0	7	NA	NA	NA	NA	7	0
ARL5A	0	0	179	NA	7	10	9	7	4	14	8	10	6	16	17	9	7	7	1	11	14	5	4	13	0	1	NA	NA	NA	NA	1	0
ARL5B	0	0	179	NA	10	7	8	7	5	13	6	11	6	16	19	10	7	6	2	13	12	5	5	11	0	2	NA	NA	NA	NA	2	0
ARL5C	0	0	179	NA	11	8	8	9	3	13	7	7	7	17	19	7	8	8	4	11	14	4	4	10	0	4	NA	NA	NA	NA	4	0
ARL6	0	0	186	NA	7	8	8	13	3	9	9	11	5	15	24	17	4	7	5	15	8	3	3	12	0	5	NA	NA	NA	NA	5	0
ARL6IP1	0	0	203	NA	14	10	8	4	3	13	9	11	3	12	30	14	9	8	7	10	9	7	6	16	0	7	NA	NA	NA	NA	5	1
ARL6IP4	0	0	360	NA	42	48	2	12	5	26	11	40	3	7	19	35	5	1	22	52	14	4	1	11	0	22	NA	NA	NA	NA	20	1
ARL6IP5	0	0	188	NA	10	12	11	9	0	6	3	12	2	13	21	10	12	15	7	9	7	3	6	20	0	7	NA	NA	NA	NA	7	0
ARL6IP6	0	0	226	NA	22	14	5	10	5	12	4	20	3	9	25	6	5	14	17	22	10	7	4	12	0	17	NA	NA	NA	NA	13	2
ARL8A	0	0	186	NA	9	9	10	11	4	13	9	11	2	16	20	16	7	7	5	11	7	5	4	10	0	5	NA	NA	NA	NA	5	0
ARL8B	0	0	238	NA	16	23	10	11	6	13	9	13	2	19	23	13	8	7	12	21	7	8	4	13	0	12	NA	NA	NA	NA	10	1
ARL9	0	0	187	NA	19	5	7	10	1	11	9	10	8	9	24	12	4	7	9	14	8	3	5	12	0	9	NA	NA	NA	NA	9	0
ARMC1	0	0	282	NA	24	17	13	16	4	21	14	13	4	10	30	15	11	9	13	26	16	2	4	20	0	13	NA	NA	NA	NA	11	1
ARMC10	0	0	343	NA	25	15	21	13	6	23	18	28	9	23	48	17	4	8	9	24	20	3	7	22	0	9	NA	NA	NA	NA	9	0
ARMC2	0	0	867	NA	52	43	50	46	22	52	39	39	19	50	117	64	14	35	39	79	42	4	13	48	0	39	NA	NA	NA	NA	31	4
ARMC3	3	1	872	PPP:11:13	75	33	52	43	14	77	24	47	14	56	102	76	23	22	39	69	31	5	20	50	3	36	11	0.0126147	13	0.0149083	30	3
ARMC4	0	0	1044	NA	88	51	57	47	27	87	39	61	24	66	119	87	17	19	36	72	47	12	18	70	0	36	NA	NA	NA	NA	32	2
ARMC5	3	1	1030	PPP:916:918	149	92	11	32	26	63	36	93	16	22	157	12	10	21	97	78	48	10	7	50	3	94	916	0.88932	918	0.891262	88	3
ARMC6	0	0	501	NA	61	26	14	31	19	29	35	33	16	23	56	23	11	12	15	31	24	3	3	36	0	15	NA	NA	NA	NA	15	0
ARMC7	0	0	198	NA	19	13	9	7	5	14	13	8	5	7	29	4	3	8	14	16	8	0	4	12	0	14	NA	NA	NA	NA	12	1
ARMC8	0	0	673	NA	49	31	26	36	20	41	35	23	19	46	101	39	26	15	23	49	35	3	14	42	0	23	NA	NA	NA	NA	23	0
ARMC9	0	0	816	NA	56	42	25	48	13	64	41	44	20	36	103	54	16	27	50	62	44	7	24	40	0	50	NA	NA	NA	NA	46	2
ARMCX1	0	0	453	NA	39	23	29	18	10	28	10	41	7	26	44	39	6	17	16	33	26	4	8	29	0	16	NA	NA	NA	NA	16	0
ARMCX2	3	1	632	PPP:141:143	98	31	29	24	5	41	18	61	5	25	42	39	14	16	41	42	38	2	13	48	3	38	141	0.223101	143	0.226266	34	2
ARMCX3	0	0	379	NA	35	25	27	21	6	26	14	23	4	18	41	26	9	15	11	23	15	5	9	26	0	11	NA	NA	NA	NA	9	1
ARMCX5	0	0	558	NA	37	22	20	19	6	50	19	28	13	40	42	55	11	18	34	44	41	6	13	40	0	34	NA	NA	NA	NA	30	2
ARMCX6	0	0	300	NA	24	13	15	17	10	27	11	25	3	14	29	15	11	12	19	22	12	6	4	11	0	19	NA	NA	NA	NA	19	0
ARMS2	0	0	107	NA	9	6	0	2	1	6	5	9	5	5	11	4	4	4	9	14	6	0	1	6	0	9	NA	NA	NA	NA	9	0
ARNT	0	0	789	NA	47	48	35	41	14	41	63	58	16	26	50	26	21	35	59	85	58	7	12	47	0	59	NA	NA	NA	NA	49	5
ARNT2	0	0	717	NA	44	39	23	33	11	41	54	58	18	29	40	28	30	28	51	85	40	6	17	42	0	51	NA	NA	NA	NA	43	4
ARNTL	3	1	626	PPP:528:530	33	35	23	46	14	32	18	49	17	36	50	38	19	21	43	67	37	4	15	29	3	40	528	0.84345	530	0.846645	38	1
ARNTL2	0	0	636	NA	35	34	28	32	13	45	27	40	18	26	58	42	17	27	28	73	36	4	16	37	0	28	NA	NA	NA	NA	24	2
ARPC1A	0	0	370	NA	24	18	17	21	10	17	12	22	13	20	26	24	9	16	13	39	22	13	6	28	0	13	NA	NA	NA	NA	13	0
ARPC1B	0	0	372	NA	34	17	15	18	14	18	8	27	12	18	28	26	7	14	14	37	20	13	6	26	0	14	NA	NA	NA	NA	14	0
ARPC2	0	0	300	NA	22	17	16	20	2	23	6	14	11	15	23	25	7	19	9	18	17	0	12	24	0	9	NA	NA	NA	NA	7	1
ARPC3	0	0	178	NA	10	7	10	9	4	12	10	9	1	11	15	18	6	9	13	9	9	2	9	5	0	13	NA	NA	NA	NA	13	0
ARPC4	0	0	187	NA	12	14	8	4	3	20	6	6	5	13	15	13	8	11	8	14	7	1	3	16	0	8	NA	NA	NA	NA	8	0
ARPC5	0	0	154	NA	15	6	8	13	1	9	5	12	2	7	12	14	4	4	4	14	6	1	3	14	0	4	NA	NA	NA	NA	2	1
ARPC5L	0	0	153	NA	17	11	8	9	0	13	7	9	2	5	15	10	3	6	5	10	6	1	2	14	0	5	NA	NA	NA	NA	5	0
ARPP19	0	0	112	NA	13	4	2	7	0	10	7	7	2	1	8	16	4	2	10	7	5	0	3	4	0	10	NA	NA	NA	NA	10	0
ARPP21	3	2	813	PPP:621:623 PPP:632:634	39	35	35	29	10	44	95	60	12	28	53	35	22	18	79	108	46	3	22	40	6	73	621	0.763838	634	0.779828	53	10
ARR3	0	0	388	NA	22	16	11	23	8	28	16	24	7	20	39	27	6	15	22	31	22	1	10	40	0	22	NA	NA	NA	NA	20	1
ARRB1	0	0	418	NA	22	25	19	30	8	35	10	23	9	15	42	35	5	17	30	16	27	0	13	37	0	30	NA	NA	NA	NA	24	3
ARRB2	0	0	421	NA	21	24	13	36	9	20	14	19	12	12	43	33	4	20	39	24	26	0	12	40	0	39	NA	NA	NA	NA	29	5
ARRDC1	0	0	433	NA	41	15	9	11	7	23	17	34	14	17	41	16	1	15	50	44	22	5	13	38	0	50	NA	NA	NA	NA	38	6
ARRDC2	3	1	407	PPP:384:386	41	35	4	14	6	24	13	31	10	12	41	12	5	16	39	31	22	5	10	36	3	36	384	0.943489	386	0.948403	28	4
ARRDC3	3	1	414	PPP:390:392	23	22	18	17	9	32	12	23	11	23	36	22	7	17	30	43	22	6	14	27	3	27	390	0.942029	392	0.94686	23	2
ARRDC4	3	1	418	PPP:394:396	35	20	11	10	13	33	15	29	8	23	35	17	6	16	38	36	21	4	13	35	3	35	394	0.942584	396	0.947368	25	5
ARRDC5	0	0	342	NA	15	15	16	12	9	24	14	15	10	16	30	17	6	17	19	32	30	3	10	32	0	19	NA	NA	NA	NA	15	2
ARSA	0	0	509	NA	55	23	8	26	15	19	18	57	18	8	68	8	11	22	50	30	29	3	16	25	0	50	NA	NA	NA	NA	40	5
ARSB	3	1	533	PPP:452:454	30	31	21	29	9	21	15	45	20	19	67	23	8	18	49	35	29	14	22	28	3	46	452	0.84803	454	0.851782	38	4
ARSD	0	0	593	NA	48	32	19	26	18	25	22	67	32	19	63	15	12	29	38	35	32	13	15	33	0	38	NA	NA	NA	NA	34	2
ARSE	0	0	614	NA	37	32	18	28	17	27	23	56	27	28	79	16	19	28	40	40	29	16	13	41	0	40	NA	NA	NA	NA	38	1
ARSF	0	0	590	NA	28	33	18	31	17	27	18	53	24	27	66	22	15	26	39	43	33	13	19	38	0	39	NA	NA	NA	NA	35	2
ARSG	0	0	525	NA	49	26	20	28	12	20	25	53	14	15	51	16	7	25	36	30	32	10	18	38	0	36	NA	NA	NA	NA	34	1
ARSH	0	0	562	NA	33	32	21	26	16	24	13	50	21	28	62	24	14	32	35	35	28	16	22	30	0	35	NA	NA	NA	NA	33	1
ARSI	0	0	569	NA	42	43	20	27	8	27	25	56	18	24	52	18	9	21	37	37	34	17	28	26	0	37	NA	NA	NA	NA	31	3
ARSJ	4	1	599	PPPP:10:13	36	27	29	25	13	26	28	54	17	36	50	42	8	15	41	42	36	16	34	24	4	37	10	0.0166945	13	0.0217028	33	2
ARSK	0	0	536	NA	35	24	32	22	5	25	19	25	21	28	52	32	18	20	30	45	28	15	26	34	0	30	NA	NA	NA	NA	28	1
ART1	3	1	327	PPP:105:107	37	20	7	11	6	15	19	23	13	8	41	9	8	20	23	25	13	7	8	14	3	20	105	0.321101	107	0.327217	16	2
ART3	0	0	389	NA	27	8	21	16	6	30	23	22	11	24	39	29	10	22	22	22	20	3	14	20	0	22	NA	NA	NA	NA	22	0
ART4	0	0	314	NA	19	13	12	11	6	12	18	16	8	18	38	20	8	20	15	23	24	4	15	14	0	15	NA	NA	NA	NA	11	2
ART5	0	0	291	NA	29	19	7	8	6	18	13	28	10	7	36	10	7	16	15	19	16	5	7	15	0	15	NA	NA	NA	NA	11	2
ARTN	4	4	237	PPP:71:73 PPP:98:100 PPPP:107:110 PPP:193:195	35	30	1	4	8	6	6	25	4	1	30	0	2	4	37	24	6	3	1	10	13	24	71	0.299578	195	0.822785	20	2
ARV1	0	0	291	NA	29	10	13	12	10	11	16	9	4	25	36	17	4	15	10	17	14	8	14	16	0	10	NA	NA	NA	NA	8	1
ARVCF	3	1	962	PPP:935:937	93	92	24	60	12	74	31	86	18	13	100	36	15	17	77	65	50	11	16	72	3	74	935	0.971933	937	0.974012	66	4
ARX	6	3	562	PPPPPP:126:131 PPPP:184:187 PPPP:445:448	107	35	4	24	7	50	16	46	10	7	57	20	4	14	61	43	29	4	8	16	14	47	126	0.224199	448	0.797153	39	4
AS3MT	0	0	375	NA	24	16	12	18	14	33	15	33	11	23	35	27	5	13	12	18	20	3	14	29	0	12	NA	NA	NA	NA	10	1
ASAH1	0	0	411	NA	18	17	23	20	8	23	9	33	5	26	42	28	10	23	21	23	31	10	16	25	0	21	NA	NA	NA	NA	17	2
ASAH2	0	0	780	NA	58	31	39	31	9	34	41	63	23	53	58	31	18	34	43	66	63	9	28	48	0	43	NA	NA	NA	NA	39	2
ASAH2B	0	0	165	NA	10	12	6	6	1	10	9	9	6	9	14	7	2	9	8	10	14	4	6	13	0	8	NA	NA	NA	NA	8	0
ASAH2C	0	0	622	NA	43	24	34	28	8	31	30	49	19	43	42	29	13	24	36	52	42	10	25	40	0	36	NA	NA	NA	NA	34	1
ASAP1	6	2	1132	PPPPPP:830:835 PPP:937:939	58	46	47	72	17	76	66	60	25	49	126	101	13	29	89	106	75	9	22	46	9	80	830	0.733216	939	0.829505	56	12
ASAP2	4	3	1006	PPP:771:773 PPPP:846:849 PPP:876:878	76	45	50	61	22	74	50	54	27	48	99	79	17	28	70	74	56	8	19	49	10	60	771	0.766402	878	0.872763	40	10
ASAP3	3	1	903	PPP:752:754	81	54	31	41	19	75	50	67	29	24	99	45	14	29	55	84	39	9	16	42	3	52	752	0.83278	754	0.834994	46	3
ASB1	0	0	335	NA	29	29	12	17	13	18	9	27	15	9	44	11	2	10	20	20	11	4	8	27	0	20	NA	NA	NA	NA	20	0
ASB10	3	1	512	PPP:36:38	59	44	6	24	19	31	17	36	21	6	77	7	5	11	40	37	25	8	7	32	3	37	36	0.0703125	38	0.0742188	35	1
ASB11	0	0	323	NA	39	16	15	9	13	19	12	22	16	14	46	16	3	13	12	13	11	2	7	25	0	12	NA	NA	NA	NA	10	1
ASB12	0	0	318	NA	31	17	12	22	9	12	19	18	10	15	54	10	4	5	17	20	12	2	11	18	0	17	NA	NA	NA	NA	15	1
ASB13	0	0	278	NA	33	13	13	13	13	16	10	19	10	11	34	13	3	5	13	18	11	2	8	20	0	13	NA	NA	NA	NA	9	2
ASB14	0	0	587	NA	51	22	27	36	16	28	21	33	24	32	83	33	13	19	26	40	25	6	21	31	0	26	NA	NA	NA	NA	26	0
ASB15	0	0	588	NA	43	22	29	36	17	40	22	38	21	31	76	34	11	15	29	27	23	8	22	44	0	29	NA	NA	NA	NA	27	1
ASB16	0	0	453	NA	69	43	13	12	19	33	27	29	15	5	60	7	6	10	26	19	23	7	7	23	0	26	NA	NA	NA	NA	24	1
ASB17	0	0	295	NA	9	20	15	15	11	12	9	10	4	25	42	17	3	14	15	20	16	4	15	19	0	15	NA	NA	NA	NA	15	0
ASB18	0	0	466	NA	55	34	9	30	18	24	18	35	21	8	74	15	6	11	30	24	18	5	8	23	0	30	NA	NA	NA	NA	30	0
ASB2	0	0	635	NA	69	38	27	30	16	43	27	34	17	27	74	32	11	16	39	43	32	5	22	33	0	39	NA	NA	NA	NA	33	3
ASB3	0	0	556	NA	53	22	26	25	17	33	23	35	20	31	77	26	12	21	23	38	20	9	17	28	0	23	NA	NA	NA	NA	21	1
ASB4	0	0	426	NA	42	19	22	20	18	23	11	16	23	20	51	25	11	12	18	22	20	8	16	29	0	18	NA	NA	NA	NA	16	1
ASB5	0	0	329	NA	33	13	12	11	11	18	19	18	13	19	48	12	3	11	15	25	16	4	11	17	0	15	NA	NA	NA	NA	15	0
ASB6	3	1	421	PPP:372:374	33	24	12	26	10	32	14	23	22	19	66	16	5	16	23	28	16	3	9	24	3	20	372	0.88361	374	0.888361	20	0
ASB7	0	0	318	NA	26	27	15	22	8	15	14	20	14	18	41	14	7	9	11	17	13	2	10	15	0	11	NA	NA	NA	NA	11	0
ASB8	0	0	288	NA	30	17	15	15	9	21	5	18	7	10	44	12	6	4	12	19	12	3	10	19	0	12	NA	NA	NA	NA	12	0
ASB9	0	0	294	NA	26	12	11	15	10	15	16	26	17	13	39	14	6	6	18	20	7	4	2	17	0	18	NA	NA	NA	NA	14	2
ASCC1	0	0	400	NA	19	23	19	24	9	35	23	26	10	24	36	23	11	17	16	28	19	2	13	23	0	16	NA	NA	NA	NA	16	0
ASCC2	3	1	757	PPP:42:44	53	48	25	63	13	64	38	30	19	33	83	42	13	32	46	51	35	5	24	40	3	43	42	0.0554822	44	0.0581242	43	0
ASCC3	0	0	2202	NA	140	115	93	117	28	157	96	108	79	152	242	144	53	93	92	130	122	27	70	144	0	92	NA	NA	NA	NA	88	2
ASCL1	0	0	236	NA	36	14	10	7	2	13	30	14	3	2	17	9	5	9	19	25	5	1	5	10	0	19	NA	NA	NA	NA	17	1
ASCL2	0	0	193	NA	27	26	4	5	3	11	4	21	3	1	17	4	1	2	21	22	6	1	3	11	0	21	NA	NA	NA	NA	15	3
ASCL3	0	0	181	NA	9	14	9	6	3	14	3	6	6	6	17	9	6	8	21	17	7	0	12	8	0	21	NA	NA	NA	NA	21	0
ASCL4	0	0	173	NA	21	23	3	7	4	17	5	12	2	2	21	6	2	2	15	12	4	4	4	7	0	15	NA	NA	NA	NA	15	0
ASF1A	0	0	204	NA	11	7	16	13	3	19	7	8	3	9	17	6	5	9	14	17	10	3	7	20	0	14	NA	NA	NA	NA	12	1
ASF1B	0	0	202	NA	11	8	14	11	6	16	6	12	4	13	20	4	5	10	19	13	7	2	5	16	0	19	NA	NA	NA	NA	17	1
ASGR1	4	1	291	PPPP:25:28	10	15	11	20	10	22	22	23	12	2	36	13	4	7	14	23	12	11	6	18	4	10	25	0.0859107	28	0.0962199	8	1
ASGR2	3	1	311	PPP:43:45	19	13	16	17	11	20	22	24	15	8	29	14	3	14	13	24	13	11	5	20	3	10	43	0.138264	45	0.144695	10	0
ASH1L	4	2	2969	PPPP:1410:1413 PPP:1422:1424	142	184	125	136	63	207	111	155	91	131	263	288	52	81	218	336	150	14	75	147	7	211	1410	0.474907	1424	0.479623	173	19
ASH2L	0	0	628	NA	50	22	21	42	11	43	21	64	15	21	43	46	13	23	45	45	36	10	27	30	0	45	NA	NA	NA	NA	35	5
ASIP	0	0	132	NA	12	12	6	5	11	4	2	1	1	2	15	12	2	5	10	17	5	0	0	10	0	10	NA	NA	NA	NA	6	2
ASL	0	0	464	NA	44	30	13	26	5	30	24	34	11	18	58	20	15	15	11	36	25	10	10	29	0	11	NA	NA	NA	NA	11	0
ASMT	0	0	356	NA	26	20	10	7	11	7	14	20	10	20	42	10	6	25	29	31	27	10	7	24	0	29	NA	NA	NA	NA	23	3
ASMTL	0	0	593	NA	26	67	11	14	23	24	27	75	30	14	68	21	7	29	40	44	23	13	12	25	0	40	NA	NA	NA	NA	32	4
ASNA1	0	0	348	NA	24	10	12	20	8	31	15	20	6	21	34	23	16	18	21	22	15	2	6	24	0	21	NA	NA	NA	NA	19	1
ASNS	0	0	561	NA	38	27	20	31	10	41	16	33	20	27	59	39	14	32	26	30	26	7	28	37	0	26	NA	NA	NA	NA	24	1
ASNSD1	0	0	643	NA	42	35	36	28	14	48	26	37	13	42	75	37	12	28	24	57	22	10	11	46	0	24	NA	NA	NA	NA	22	1
ASPA	0	0	313	NA	18	12	15	19	9	23	9	18	14	27	28	23	7	14	19	10	18	2	13	15	0	19	NA	NA	NA	NA	17	1
ASPDH	0	0	283	NA	34	23	6	12	5	13	10	30	10	6	35	1	5	7	22	19	13	5	2	25	0	22	NA	NA	NA	NA	20	1
ASPG	0	0	595	NA	65	38	14	24	12	34	29	65	14	13	85	10	14	17	33	37	28	6	10	47	0	33	NA	NA	NA	NA	27	3
ASPH	0	0	758	NA	43	38	27	52	8	89	36	54	22	25	62	54	12	24	42	46	38	14	19	53	0	42	NA	NA	NA	NA	36	3
ASPHD1	3	1	390	PPP:236:238	37	35	8	14	11	18	13	62	6	5	42	4	7	15	40	27	10	9	7	20	3	37	236	0.605128	238	0.610256	33	2
ASPHD2	0	0	369	NA	21	24	18	15	19	19	15	27	11	13	36	11	6	16	24	23	20	10	14	27	0	24	NA	NA	NA	NA	22	1
ASPM	0	0	3477	NA	282	327	134	77	64	158	245	76	108	264	311	357	82	121	71	232	168	45	155	200	0	71	NA	NA	NA	NA	65	3
ASPN	0	0	380	NA	14	15	28	28	7	22	8	16	11	22	51	33	12	21	24	24	17	1	9	17	0	24	NA	NA	NA	NA	22	1
ASPRV1	0	0	343	NA	35	12	11	16	3	28	12	29	9	12	40	20	4	15	23	25	12	5	4	28	0	23	NA	NA	NA	NA	23	0
ASPSCR1	0	0	647	NA	53	53	8	32	12	45	32	55	12	7	67	28	5	21	76	56	30	5	8	42	0	76	NA	NA	NA	NA	66	5
ASRGL1	0	0	308	NA	34	10	11	20	6	18	7	40	7	14	22	23	9	5	11	15	19	3	4	30	0	11	NA	NA	NA	NA	11	0
ASS1	0	0	412	NA	28	20	16	16	5	35	17	31	10	27	34	33	9	15	20	24	18	5	19	30	0	20	NA	NA	NA	NA	18	1
ASTE1	0	0	704	NA	40	36	36	33	24	37	34	33	22	36	100	41	15	32	32	54	38	9	19	33	0	32	NA	NA	NA	NA	30	1
ASTL	0	0	431	NA	32	27	8	13	7	23	17	47	10	21	40	10	8	13	42	55	17	9	8	24	0	42	NA	NA	NA	NA	42	0
ASTN1	0	0	1302	NA	66	70	50	82	49	92	55	87	35	61	137	49	28	38	80	121	72	19	36	75	0	80	NA	NA	NA	NA	76	2
ASTN2	4	2	1339	PPP:28:30 PPPP:43:46	84	77	33	68	43	95	56	95	31	51	150	58	25	44	81	126	82	16	43	81	7	74	28	0.0209111	46	0.034354	68	3
ASXL1	0	0	1541	NA	113	84	46	80	29	116	80	130	32	36	136	88	27	37	131	179	90	14	13	80	0	131	NA	NA	NA	NA	117	7
ASXL2	0	0	1435	NA	102	66	48	45	23	100	96	97	26	45	111	102	25	28	128	186	106	6	14	81	0	128	NA	NA	NA	NA	116	6
ASXL3	12	5	2248	PPP:1130:1132 PPP:1692:1694 PPPPPPPPPPPP:2017:2028 PPPPPPPPP:2032:2040 PPP:2042:2044	160	76	100	77	45	186	117	113	51	96	181	147	52	50	197	306	156	7	17	114	30	167	1130	0.502669	2044	0.909253	143	12
ASZ1	0	0	475	NA	31	20	23	25	9	44	23	27	12	28	65	37	9	17	10	29	31	5	6	24	0	10	NA	NA	NA	NA	10	0
ATAD1	0	0	361	NA	30	18	12	27	6	22	18	14	11	24	37	28	13	13	14	23	18	4	5	24	0	14	NA	NA	NA	NA	10	2
ATAD2	3	1	1390	PPP:963:965	91	112	56	109	24	121	66	51	34	72	122	95	22	44	67	119	69	5	35	76	3	64	963	0.692806	965	0.694245	58	3
ATAD2B	0	0	1458	NA	92	116	60	90	27	138	52	73	41	71	141	98	27	49	72	141	65	8	27	70	0	72	NA	NA	NA	NA	58	7
ATAD3A	4	1	634	PPPP:18:21	73	59	17	27	5	59	43	42	11	17	67	36	18	16	26	32	32	9	13	32	4	22	18	0.0283912	21	0.033123	18	2
ATAD3B	4	1	648	PPPP:18:21	66	61	16	26	10	55	38	49	14	17	69	36	19	18	33	33	35	7	13	33	4	29	18	0.0277778	21	0.0324074	23	3
ATAD3C	0	0	411	NA	40	34	10	20	5	27	25	26	10	15	48	24	15	14	13	21	24	4	10	26	0	13	NA	NA	NA	NA	11	1
ATAD5	3	2	1844	PPP:13:15 PPP:1219:1221	91	79	111	101	36	143	76	67	24	83	165	230	25	72	84	201	122	10	29	95	6	78	13	0.00704989	1221	0.662148	68	5
ATAT1	3	1	421	PPP:266:268	39	40	15	17	4	24	24	24	15	16	35	18	5	15	49	32	19	3	7	20	3	46	266	0.631829	268	0.63658	28	9
ATCAY	0	0	377	NA	18	23	16	29	3	38	11	20	9	24	41	13	10	11	26	26	19	5	11	24	0	26	NA	NA	NA	NA	24	1
ATE1	0	0	518	NA	23	24	14	29	16	36	31	29	11	16	43	45	13	20	41	50	15	5	28	29	0	41	NA	NA	NA	NA	29	6
ATF1	0	0	271	NA	18	13	9	12	2	15	25	17	4	13	20	16	6	0	12	36	29	0	7	17	0	12	NA	NA	NA	NA	12	0
ATF2	0	0	505	NA	41	23	17	22	5	29	34	17	16	16	38	29	10	10	51	63	41	2	2	39	0	51	NA	NA	NA	NA	49	1
ATF3	0	0	181	NA	14	13	9	4	5	22	10	5	5	9	17	17	4	5	9	14	7	0	1	11	0	9	NA	NA	NA	NA	7	1
ATF4	0	0	351	NA	22	11	8	30	5	31	12	22	5	8	40	32	10	10	29	33	18	2	7	16	0	29	NA	NA	NA	NA	25	2
ATF5	4	5	282	PPP:123:125 PPP:127:129 PPPP:131:134 PPP:181:183 PPPP:186:189	24	18	3	14	3	24	13	19	1	3	44	11	5	5	53	15	9	2	7	9	17	36	123	0.43617	189	0.670213	18	9
ATF6	4	1	670	PPPP:463:466	39	37	39	29	5	40	45	26	12	31	64	35	19	14	54	70	42	4	17	48	4	50	463	0.691045	466	0.695522	46	2
ATF6B	3	1	703	PPP:275:277	42	45	18	32	10	49	44	37	11	22	77	28	15	19	85	85	27	4	6	47	3	82	275	0.391181	277	0.394026	62	10
ATF7	0	0	494	NA	39	27	14	17	7	30	27	26	14	19	39	26	14	8	60	55	35	1	2	34	0	60	NA	NA	NA	NA	50	5
ATF7IP	0	0	1278	NA	88	40	63	87	15	109	62	53	21	50	91	72	16	20	129	148	102	4	14	94	0	129	NA	NA	NA	NA	107	11
ATF7IP2	0	0	682	NA	28	25	58	27	19	56	26	18	12	36	53	61	12	18	42	93	45	3	9	41	0	42	NA	NA	NA	NA	34	4
ATG10	0	0	220	NA	9	6	8	10	8	18	12	12	8	13	18	13	6	10	13	16	11	5	10	14	0	13	NA	NA	NA	NA	13	0
ATG12	0	0	187	NA	14	10	2	8	5	12	8	11	3	8	19	14	3	6	15	17	13	3	4	12	0	15	NA	NA	NA	NA	13	1
ATG13	0	0	550	NA	36	23	16	33	10	34	23	33	14	25	47	23	14	25	40	55	43	2	13	41	0	40	NA	NA	NA	NA	32	4
ATG14	0	0	492	NA	31	33	19	29	13	41	21	27	10	20	44	35	10	12	21	53	26	7	13	27	0	21	NA	NA	NA	NA	19	1
ATG16L1	0	0	624	NA	49	45	22	43	12	49	29	34	18	28	65	39	9	18	17	59	32	11	7	38	0	17	NA	NA	NA	NA	17	0
ATG16L2	0	0	619	NA	68	58	16	31	13	44	38	40	17	16	65	32	4	11	23	43	26	13	11	50	0	23	NA	NA	NA	NA	23	0
ATG2A	3	2	1940	PPP:1245:1247 PPP:1326:1328	142	126	33	100	38	137	92	134	63	50	258	53	31	62	170	165	103	21	35	127	6	164	1245	0.641753	1328	0.684536	130	17
ATG2B	0	0	2078	NA	109	100	72	115	33	156	89	106	66	99	214	104	49	94	135	221	114	18	53	131	0	135	NA	NA	NA	NA	117	9
ATG3	4	1	314	PPPP:254:257	19	8	7	21	8	40	11	19	12	18	24	22	8	7	14	6	28	4	16	22	4	10	254	0.808917	257	0.818471	10	0
ATG4A	0	0	398	NA	19	13	14	26	12	30	21	24	7	20	43	26	11	21	22	26	21	10	11	21	0	22	NA	NA	NA	NA	16	3
ATG4B	0	0	510	NA	42	45	10	28	14	26	15	38	13	21	42	18	11	23	38	35	34	14	14	29	0	38	NA	NA	NA	NA	34	2
ATG4C	0	0	458	NA	22	18	13	32	10	35	12	28	12	26	36	38	9	28	16	38	33	9	20	23	0	16	NA	NA	NA	NA	16	0
ATG4D	0	0	474	NA	34	43	5	26	14	24	16	40	12	8	48	17	10	20	41	43	18	11	15	29	0	41	NA	NA	NA	NA	35	3
ATG5	0	0	275	NA	12	11	7	20	4	22	14	9	11	18	29	20	9	15	19	13	14	7	10	11	0	19	NA	NA	NA	NA	19	0
ATG7	0	0	703	NA	59	31	28	42	20	36	27	46	14	24	87	37	17	36	41	49	31	10	21	47	0	41	NA	NA	NA	NA	39	1
ATG9A	0	0	839	NA	67	50	22	25	17	59	47	55	34	43	100	20	14	45	51	63	36	15	26	50	0	51	NA	NA	NA	NA	43	4
ATHL1	0	0	764	NA	71	40	19	34	12	49	33	68	23	14	85	12	13	35	57	58	44	18	21	58	0	57	NA	NA	NA	NA	53	2
ATIC	0	0	592	NA	66	28	24	33	9	37	20	38	13	30	57	37	10	19	25	39	32	5	18	52	0	25	NA	NA	NA	NA	25	0
ATL1	0	0	558	NA	38	22	24	28	6	46	24	34	13	35	56	42	13	29	18	39	30	9	22	30	0	18	NA	NA	NA	NA	18	0
ATL2	0	0	583	NA	39	28	29	35	11	47	32	37	16	31	60	33	15	26	19	32	29	7	20	37	0	19	NA	NA	NA	NA	19	0
ATL3	0	0	568	NA	44	24	18	30	11	37	33	45	13	26	54	34	15	33	25	41	26	5	21	33	0	25	NA	NA	NA	NA	25	0
ATM	0	0	3056	NA	157	152	138	156	89	233	154	119	72	179	389	214	79	123	98	233	158	38	96	179	0	98	NA	NA	NA	NA	94	2
ATMIN	0	0	823	NA	65	23	40	41	19	46	51	44	18	35	71	34	18	32	62	102	71	4	8	39	0	62	NA	NA	NA	NA	54	4
ATN1	6	12	1190	PPP:161:163 PPP:213:215 PPP:254:256 PPP:289:291 PPPP:302:305 PPP:413:415 PPPPPP:442:447 PPPP:509:512 PPP:550:552 PPP:636:638 PPPP:709:712 PPP:749:751	108	65	27	31	3	64	64	97	58	10	88	39	15	22	223	153	48	2	30	43	42	181	161	0.135294	751	0.631092	125	28
ATOH1	5	2	354	PPPPP:31:35 PPPPP:224:228	38	25	10	14	5	22	24	26	16	5	32	13	5	6	36	41	13	2	7	14	10	26	31	0.0875706	228	0.644068	20	3
ATOH7	0	0	152	NA	19	17	2	4	5	11	7	15	3	2	14	6	5	7	11	8	6	2	4	4	0	11	NA	NA	NA	NA	7	2
ATOH8	7	1	321	PPPPPPP:124:130	39	33	8	9	7	18	11	20	6	9	26	18	1	5	47	23	15	1	7	18	7	40	124	0.386293	130	0.404984	28	6
ATOX1	0	0	73	NA	4	1	2	4	3	6	0	7	2	2	8	9	3	1	2	6	5	0	2	6	0	2	NA	NA	NA	NA	2	0
ATP10A	3	1	1499	PPP:33:35	108	106	50	61	39	89	64	85	35	56	181	63	27	67	76	143	85	20	41	103	3	73	33	0.0220147	35	0.0233489	65	4
ATP10B	0	0	1461	NA	79	86	52	76	42	88	68	77	33	81	157	69	40	73	66	131	97	21	41	84	0	66	NA	NA	NA	NA	56	5
ATP10D	0	0	1426	NA	94	72	53	62	34	90	62	79	30	80	160	76	38	67	71	121	71	18	48	100	0	71	NA	NA	NA	NA	63	4
ATP11A	3	2	1191	PPP:33:35 PPP:1163:1165	67	62	42	58	29	76	49	69	29	73	127	62	26	66	46	81	70	19	50	90	6	40	33	0.0277078	1165	0.97817	40	0
ATP11B	0	0	1177	NA	65	58	45	50	23	76	50	62	29	88	128	61	27	70	37	90	80	18	41	79	0	37	NA	NA	NA	NA	35	1
ATP11C	0	0	1132	NA	71	54	50	52	26	80	42	54	19	70	122	70	25	71	31	72	84	14	47	78	0	31	NA	NA	NA	NA	29	1
ATP12A	0	0	1045	NA	74	40	45	54	15	64	37	69	20	97	98	68	26	41	38	72	65	12	32	78	0	38	NA	NA	NA	NA	34	2
ATP13A1	0	0	1204	NA	110	63	28	47	29	67	51	70	27	57	153	61	23	57	74	83	62	13	30	99	0	74	NA	NA	NA	NA	62	6
ATP13A2	0	0	1180	NA	97	66	22	40	27	53	56	81	20	45	163	36	29	39	89	85	67	15	33	117	0	89	NA	NA	NA	NA	79	5
ATP13A3	0	0	1226	NA	75	45	48	50	32	73	47	63	26	98	121	67	37	61	58	84	72	19	42	108	0	58	NA	NA	NA	NA	48	5
ATP13A4	0	0	1196	NA	74	52	40	42	32	75	49	72	26	91	129	55	32	57	56	93	72	21	36	92	0	56	NA	NA	NA	NA	48	4
ATP13A5	0	0	1218	NA	68	45	47	37	33	73	60	74	24	78	138	72	29	64	61	86	71	21	44	93	0	61	NA	NA	NA	NA	51	5
ATP1A1	3	1	1023	PPP:82:84	81	46	42	58	23	67	37	76	15	83	96	56	25	45	44	58	60	12	24	75	3	41	82	0.0801564	84	0.0821114	39	1
ATP1A2	3	1	1020	PPP:80:82	81	50	39	55	23	68	38	79	12	76	96	56	30	43	42	62	63	11	22	74	3	39	80	0.0784314	82	0.0803922	37	1
ATP1A3	3	2	1226	PPP:72:74 PPP:1158:1160	91	54	45	63	34	66	39	99	22	83	138	57	27	51	80	91	68	14	23	81	6	74	72	0.0587276	1160	0.946166	58	8
ATP1A4	3	1	1029	PPP:90:92	74	43	38	47	18	66	39	71	16	83	101	63	33	47	43	65	71	12	25	74	3	40	90	0.0874636	92	0.0894072	38	1
ATP1B1	0	0	303	NA	8	15	14	15	7	25	12	26	1	19	24	31	5	18	20	13	12	4	18	16	0	20	NA	NA	NA	NA	16	2
ATP1B2	0	0	290	NA	16	14	25	15	7	13	15	18	5	12	18	18	10	18	13	10	19	5	14	25	0	13	NA	NA	NA	NA	13	0
ATP1B3	0	0	279	NA	15	8	14	14	6	13	11	19	2	13	29	23	8	17	20	15	14	3	15	20	0	20	NA	NA	NA	NA	20	0
ATP1B4	0	0	357	NA	15	21	18	19	7	40	18	19	4	17	27	16	8	20	22	22	16	5	20	23	0	22	NA	NA	NA	NA	18	2
ATP2A1	0	0	1001	NA	91	51	38	53	24	79	23	67	9	70	97	53	29	36	46	50	64	13	23	85	0	46	NA	NA	NA	NA	36	5
ATP2A2	0	0	1042	NA	84	43	45	49	29	76	27	66	13	76	96	57	32	43	48	67	66	16	19	90	0	48	NA	NA	NA	NA	40	4
ATP2A3	0	0	1052	NA	103	64	30	46	26	75	34	72	16	57	110	37	28	36	53	69	68	15	19	94	0	53	NA	NA	NA	NA	43	5
ATP2B1	3	1	1220	PPP:1179:1181	83	52	56	68	17	93	40	91	19	95	113	89	26	47	58	75	71	13	22	92	3	55	1179	0.966393	1181	0.968033	43	6
ATP2B2	0	0	1243	NA	90	55	51	69	21	90	51	92	18	93	106	85	34	47	60	78	75	12	21	95	0	60	NA	NA	NA	NA	48	6
ATP2B3	4	1	1220	PPPP:1174:1177	89	57	47	65	20	91	52	95	17	86	111	75	30	48	59	71	77	12	21	97	4	55	1174	0.962295	1177	0.964754	45	5
ATP2B4	0	0	1205	NA	73	55	58	65	21	84	49	84	18	97	114	83	27	50	55	69	71	12	22	98	0	55	NA	NA	NA	NA	47	4
ATP2C1	0	0	973	NA	67	40	31	45	21	57	45	64	14	72	99	58	33	38	41	71	60	9	19	89	0	41	NA	NA	NA	NA	29	6
ATP2C2	0	0	975	NA	67	41	26	41	22	71	38	80	6	60	115	62	32	40	38	72	58	7	14	85	0	38	NA	NA	NA	NA	26	6
ATP4A	0	0	1035	NA	93	51	34	54	30	60	46	75	13	73	101	48	26	49	48	57	60	11	30	76	0	48	NA	NA	NA	NA	42	3
ATP4B	0	0	291	NA	20	12	15	13	9	16	16	16	6	9	25	17	8	18	21	14	15	4	18	19	0	21	NA	NA	NA	NA	19	1
ATP5A1	0	0	553	NA	58	38	16	29	2	31	25	51	7	39	53	30	12	16	18	39	27	0	16	46	0	18	NA	NA	NA	NA	16	1
ATP5B	0	0	529	NA	59	26	9	27	0	37	24	49	10	36	48	23	14	16	32	26	33	0	13	47	0	32	NA	NA	NA	NA	26	3
ATP5C1	0	0	298	NA	32	15	11	16	1	18	10	17	3	27	26	26	10	9	6	27	17	2	11	14	0	6	NA	NA	NA	NA	4	1
ATP5D	0	0	168	NA	33	9	6	6	0	11	7	11	3	5	19	4	3	6	8	9	10	0	2	16	0	8	NA	NA	NA	NA	8	0
ATP5E	0	0	51	NA	7	3	2	1	1	3	2	2	0	3	2	8	1	1	0	4	2	1	3	5	0	0	NA	NA	NA	NA	0	0
ATP5F1	0	0	256	NA	25	11	8	6	1	17	19	13	7	14	26	20	7	9	12	11	13	1	13	23	0	12	NA	NA	NA	NA	10	1
ATP5G1	0	0	136	NA	18	7	4	2	3	2	6	13	0	10	14	3	4	11	6	15	6	0	3	9	0	6	NA	NA	NA	NA	6	0
ATP5G2	0	0	198	NA	24	8	1	3	7	6	4	14	2	11	27	6	5	11	12	31	10	0	3	13	0	12	NA	NA	NA	NA	12	0
ATP5G3	0	0	142	NA	22	8	3	2	3	4	6	16	0	11	13	3	4	10	4	15	7	0	3	8	0	4	NA	NA	NA	NA	4	0
ATP5H	0	0	161	NA	19	3	8	10	1	17	5	2	1	9	13	20	4	5	11	7	6	5	6	9	0	11	NA	NA	NA	NA	9	1
ATP5I	0	0	69	NA	8	7	1	3	0	8	2	3	0	4	8	7	1	1	4	3	1	0	4	4	0	4	NA	NA	NA	NA	2	1
ATP5J	0	0	119	NA	5	10	4	7	0	8	8	4	3	7	11	8	3	10	4	13	4	1	2	7	0	4	NA	NA	NA	NA	4	0
ATP5J2	0	0	98	NA	3	5	2	2	1	3	1	7	4	6	9	10	3	6	3	13	1	1	9	9	0	3	NA	NA	NA	NA	3	0
ATP5L	0	0	103	NA	11	4	4	1	0	6	4	6	0	7	9	8	2	4	6	4	7	2	5	13	0	6	NA	NA	NA	NA	4	1
ATP5L2	0	0	100	NA	11	5	3	0	0	6	3	5	0	6	10	7	1	4	7	5	10	2	4	11	0	7	NA	NA	NA	NA	5	1
ATP5O	0	0	213	NA	18	13	7	3	2	14	9	11	1	10	23	18	6	5	10	21	13	0	5	24	0	10	NA	NA	NA	NA	8	1
ATP5S	0	0	266	NA	17	20	7	18	9	16	10	25	7	17	30	14	8	5	12	23	8	3	8	9	0	12	NA	NA	NA	NA	12	0
ATP5SL	3	1	333	PPP:55:57	23	25	10	18	9	21	19	25	10	11	41	15	4	10	23	22	10	8	9	20	3	20	55	0.165165	57	0.171171	20	0
ATP6AP1	0	0	470	NA	49	21	14	23	3	17	22	24	9	14	65	12	14	25	27	42	30	11	15	33	0	27	NA	NA	NA	NA	25	1
ATP6AP1L	0	0	224	NA	19	14	7	11	3	6	15	12	2	15	34	13	3	10	6	24	7	4	10	9	0	6	NA	NA	NA	NA	6	0
ATP6AP2	0	0	350	NA	25	16	21	18	0	19	8	17	6	18	46	16	11	15	17	36	9	4	13	35	0	17	NA	NA	NA	NA	15	1
ATP6V0A1	0	0	838	NA	41	44	43	29	14	61	32	51	21	59	93	37	29	68	36	46	46	12	26	50	0	36	NA	NA	NA	NA	34	1
ATP6V0A2	0	0	856	NA	40	40	38	25	19	65	29	51	20	53	110	41	28	59	33	59	37	12	32	65	0	33	NA	NA	NA	NA	25	4
ATP6V0A4	0	0	840	NA	50	37	40	28	16	59	42	44	20	63	94	34	31	61	29	55	42	15	25	55	0	29	NA	NA	NA	NA	27	1
ATP6V0B	3	1	261	PPP:238:240	24	4	7	5	9	5	4	27	5	26	32	9	6	17	16	22	10	5	7	21	3	13	238	0.911877	240	0.91954	13	0
ATP6V0C	0	0	155	NA	23	3	2	3	0	4	4	20	0	16	18	5	8	7	4	15	4	0	5	14	0	4	NA	NA	NA	NA	4	0
ATP6V0D1	0	0	392	NA	30	18	19	21	8	33	14	21	10	22	46	18	8	26	23	20	16	2	18	19	0	23	NA	NA	NA	NA	19	2
ATP6V0D2	0	0	350	NA	20	15	20	16	9	33	12	19	9	20	43	20	10	21	11	14	20	1	19	18	0	11	NA	NA	NA	NA	11	0
ATP6V0E1	0	0	81	NA	3	1	3	0	3	1	2	6	2	7	11	3	3	6	7	2	4	5	4	8	0	7	NA	NA	NA	NA	7	0
ATP6V0E2	0	0	213	NA	19	11	1	4	7	1	9	25	4	7	32	2	6	5	26	23	11	5	2	13	0	26	NA	NA	NA	NA	26	0
ATP6V1A	0	0	617	NA	42	32	16	38	7	43	18	50	9	38	50	35	22	22	31	49	34	6	25	50	0	31	NA	NA	NA	NA	25	3
ATP6V1B1	0	0	513	NA	41	31	21	29	7	34	22	40	10	39	42	20	17	22	29	26	30	1	17	35	0	29	NA	NA	NA	NA	27	1
ATP6V1B2	0	0	511	NA	42	32	20	27	6	35	21	39	8	38	43	21	16	20	31	29	28	1	18	36	0	31	NA	NA	NA	NA	29	1
ATP6V1C1	0	0	382	NA	27	14	25	26	3	26	16	11	6	17	47	38	8	15	11	22	15	6	15	34	0	11	NA	NA	NA	NA	11	0
ATP6V1C2	0	0	427	NA	23	20	17	26	1	36	16	17	7	16	50	36	9	21	16	34	27	5	13	37	0	16	NA	NA	NA	NA	16	0
ATP6V1D	0	0	247	NA	24	19	8	10	0	29	9	11	3	18	28	27	6	9	4	9	15	0	5	13	0	4	NA	NA	NA	NA	4	0
ATP6V1E1	0	0	226	NA	19	14	10	16	1	20	20	8	1	16	24	23	10	5	5	6	6	0	7	15	0	5	NA	NA	NA	NA	5	0
ATP6V1E2	0	0	226	NA	19	15	9	10	1	24	16	7	2	16	27	22	10	5	5	10	5	0	6	17	0	5	NA	NA	NA	NA	5	0
ATP6V1F	0	0	147	NA	11	11	8	13	0	11	5	11	4	14	14	5	3	5	8	7	6	1	2	8	0	8	NA	NA	NA	NA	6	1
ATP6V1G1	0	0	118	NA	13	12	5	3	2	17	12	4	1	6	9	11	2	3	1	6	4	0	3	4	0	1	NA	NA	NA	NA	1	0
ATP6V1G2	0	0	158	NA	18	17	3	1	2	11	22	25	8	1	8	4	4	1	10	6	3	0	2	12	0	10	NA	NA	NA	NA	10	0
ATP6V1G3	0	0	124	NA	7	6	7	5	1	13	12	7	3	6	10	16	8	1	1	8	5	0	4	4	0	1	NA	NA	NA	NA	1	0
ATP6V1H	0	0	483	NA	35	25	21	21	10	41	38	19	11	25	48	31	19	17	11	33	17	9	18	34	0	11	NA	NA	NA	NA	11	0
ATP7A	0	0	1500	NA	106	48	67	66	26	93	54	92	34	130	135	87	44	43	62	133	99	9	31	141	0	62	NA	NA	NA	NA	58	2
ATP7B	0	0	1465	NA	134	53	49	61	29	80	69	106	36	106	132	74	44	36	72	126	82	11	24	141	0	72	NA	NA	NA	NA	66	3
ATP8A1	0	0	1164	NA	78	49	60	52	23	71	49	68	23	83	127	67	25	56	36	78	74	21	41	83	0	36	NA	NA	NA	NA	32	2
ATP8A2	3	1	1188	PPP:469:471	84	59	54	55	26	68	41	73	24	77	138	73	26	50	40	71	83	19	42	85	3	37	469	0.394781	471	0.396465	33	2
ATP8B1	0	0	1251	NA	90	72	59	75	21	78	54	65	22	84	118	78	26	75	35	69	83	19	54	74	0	35	NA	NA	NA	NA	31	2
ATP8B2	0	0	1223	NA	81	60	55	56	23	74	49	73	24	70	133	64	35	78	37	84	75	18	44	90	0	37	NA	NA	NA	NA	33	2
ATP8B3	0	0	1310	NA	97	82	48	61	28	80	58	76	23	68	149	63	33	68	53	93	72	21	42	95	0	53	NA	NA	NA	NA	49	2
ATP8B4	3	1	1192	PPP:1153:1155	70	55	64	59	22	71	49	65	27	86	123	69	25	76	29	84	75	19	40	84	3	26	1153	0.967282	1155	0.96896	24	1
ATP9A	0	0	1047	NA	62	64	32	44	26	62	48	57	18	60	120	46	27	47	36	76	68	14	42	98	0	36	NA	NA	NA	NA	30	3
ATP9B	0	0	1147	NA	82	66	29	49	27	72	49	66	22	60	122	57	37	55	38	91	72	16	43	94	0	38	NA	NA	NA	NA	34	2
ATPAF1	0	0	328	NA	37	21	11	11	6	27	21	25	3	14	29	19	5	17	13	17	16	3	11	22	0	13	NA	NA	NA	NA	13	0
ATPAF2	0	0	289	NA	23	20	9	11	4	24	14	14	6	17	33	14	5	6	15	20	24	7	9	14	0	15	NA	NA	NA	NA	13	1
ATPBD4	0	0	267	NA	20	14	10	17	6	22	11	15	7	17	31	15	8	5	8	16	8	1	16	20	0	8	NA	NA	NA	NA	8	0
ATPIF1	0	0	106	NA	12	11	1	4	0	14	7	9	6	5	6	10	3	3	0	4	3	2	1	5	0	0	NA	NA	NA	NA	0	0
ATR	0	0	2644	NA	169	125	91	126	63	178	118	112	90	145	352	175	85	109	99	205	126	32	84	160	0	99	NA	NA	NA	NA	95	2
ATRIP	3	1	791	PPP:22:24	61	41	18	42	23	52	45	52	25	14	108	37	15	25	55	81	36	4	5	52	3	52	22	0.0278129	24	0.0303413	42	5
ATRN	3	1	1429	PPP:1383:1385	102	68	87	65	88	65	52	105	42	54	112	62	30	59	75	120	79	31	52	81	3	72	1383	0.96781	1385	0.969209	62	5
ATRNL1	3	1	1379	PPP:1334:1336	81	51	97	56	86	61	56	114	35	69	99	67	20	48	65	126	81	33	62	72	3	62	1334	0.967368	1336	0.968818	58	2
ATRX	3	2	2492	PPP:2469:2471 PPP:2476:2478	101	128	125	183	43	261	116	120	44	105	176	294	59	53	90	277	127	15	52	123	6	84	2469	0.99077	2478	0.994382	76	4
ATXN1	3	1	815	PPP:239:241	76	29	22	19	6	43	73	60	31	30	63	37	11	17	87	89	48	3	19	52	3	84	239	0.293252	241	0.295706	66	9
ATXN10	3	1	475	PPP:6:8	33	25	29	29	13	38	19	15	8	35	66	26	8	19	23	29	22	3	5	30	3	20	6	0.0126316	8	0.0168421	18	1
ATXN1L	3	2	689	PPP:187:189 PPP:457:459	59	35	16	21	9	42	44	53	22	16	58	18	10	18	81	83	33	4	14	53	6	75	187	0.271408	459	0.666183	57	9
ATXN2	4	3	1313	PPPP:55:58 PPP:62:64 PPP:189:191	126	74	56	33	11	57	102	85	46	31	54	49	32	27	184	176	65	7	31	67	10	174	55	0.0418888	191	0.145468	136	19
ATXN2L	4	5	1097	PPP:16:18 PPPP:81:84 PPPP:436:439 PPPP:624:627 PPP:976:978	96	51	29	33	9	53	80	97	33	27	67	44	22	22	174	124	53	2	27	54	18	156	16	0.0145852	978	0.891522	116	20
ATXN3	0	0	377	NA	19	21	15	23	5	38	42	22	9	16	45	17	13	15	9	31	14	3	7	13	0	9	NA	NA	NA	NA	9	0
ATXN3L	0	0	355	NA	16	13	15	22	6	39	30	17	11	20	34	24	7	17	12	31	16	3	8	14	0	12	NA	NA	NA	NA	12	0
ATXN7	5	3	945	PPPP:40:43 PPPPP:51:55 PPP:470:472	59	54	40	31	22	38	45	60	37	24	65	61	17	20	110	150	51	5	7	49	12	98	40	0.042328	472	0.499471	78	10
ATXN7L1	0	0	861	NA	63	41	36	33	16	30	21	43	30	20	68	68	17	19	88	158	47	4	9	50	0	88	NA	NA	NA	NA	72	8
ATXN7L2	5	2	722	PPPPP:114:118 PPP:397:399	70	49	15	25	29	46	24	53	20	11	50	57	13	14	88	78	35	4	8	33	8	80	114	0.157895	399	0.552632	58	11
ATXN7L3	0	0	354	NA	14	18	23	28	10	22	12	21	6	14	28	31	8	12	19	49	15	5	8	11	0	19	NA	NA	NA	NA	15	2
ATXN7L3B	0	0	97	NA	6	3	3	6	5	11	6	8	1	5	10	4	1	6	7	5	2	0	3	5	0	7	NA	NA	NA	NA	5	1
AUH	0	0	339	NA	52	23	8	12	5	22	7	36	3	22	38	23	8	5	18	19	8	3	5	22	0	18	NA	NA	NA	NA	16	1
AUP1	0	0	474	NA	33	35	9	15	9	29	25	24	9	10	67	11	7	29	43	41	29	6	5	38	0	43	NA	NA	NA	NA	37	3
AURKA	0	0	403	NA	24	26	19	11	7	31	27	19	12	15	43	32	4	13	30	33	17	4	12	24	0	30	NA	NA	NA	NA	26	2
AURKAIP1	0	0	199	NA	14	22	2	4	4	11	11	19	2	6	23	17	4	3	18	11	8	5	4	11	0	18	NA	NA	NA	NA	12	3
AURKB	0	0	344	NA	22	26	12	12	5	25	13	19	13	18	40	22	9	10	25	22	13	4	13	21	0	25	NA	NA	NA	NA	19	3
AURKC	0	0	309	NA	22	26	5	13	5	25	15	16	11	17	41	18	6	9	20	16	11	3	13	17	0	20	NA	NA	NA	NA	14	3
AUTS2	5	7	1259	PPP:334:336 PPPPP:467:471 PPP:516:518 PPP:727:729 PPP:806:808 PPPP:1005:1008 PPP:1220:1222	86	99	33	64	7	73	55	75	83	28	98	60	19	38	179	136	64	5	17	40	24	155	334	0.26529	1222	0.970612	115	20
AVEN	0	0	362	NA	25	30	12	25	4	38	16	56	2	6	28	18	4	7	25	30	9	4	4	19	0	25	NA	NA	NA	NA	25	0
AVIL	0	0	819	NA	63	34	31	56	6	56	46	62	17	44	69	58	19	34	32	49	43	17	28	55	0	32	NA	NA	NA	NA	28	2
AVL9	0	0	648	NA	38	25	26	36	6	41	33	46	24	26	71	35	12	26	39	54	37	7	19	47	0	39	NA	NA	NA	NA	31	4
AVP	0	0	164	NA	19	12	4	7	17	11	8	19	1	1	16	3	3	8	14	10	4	0	3	4	0	14	NA	NA	NA	NA	14	0
AVPI1	3	1	147	PPP:11:13	17	18	3	3	2	10	12	6	8	8	13	7	1	2	11	14	4	3	2	3	3	8	11	0.0748299	13	0.0884354	6	1
AVPR1A	0	0	418	NA	36	24	17	12	14	12	15	23	6	22	31	18	16	24	23	38	27	15	10	35	0	23	NA	NA	NA	NA	21	1
AVPR1B	0	0	424	NA	35	29	11	16	12	11	13	27	7	18	65	9	11	16	28	34	34	14	9	25	0	28	NA	NA	NA	NA	28	0
AVPR2	0	0	371	NA	47	29	6	10	11	11	9	24	9	12	49	4	10	14	26	35	17	11	7	30	0	26	NA	NA	NA	NA	24	1
AWAT1	0	0	328	NA	14	12	6	8	9	11	16	23	15	13	40	16	7	28	21	20	23	9	15	22	0	21	NA	NA	NA	NA	21	0
AWAT2	0	0	333	NA	17	15	7	10	6	10	9	24	13	21	36	17	7	26	21	21	25	10	15	23	0	21	NA	NA	NA	NA	21	0
AXDND1	0	0	1012	NA	41	44	51	53	12	127	42	31	30	63	123	101	26	25	33	64	52	12	30	52	0	33	NA	NA	NA	NA	29	2
AXIN1	0	0	862	NA	67	69	16	44	16	81	35	68	32	26	58	48	13	22	72	75	37	8	24	51	0	72	NA	NA	NA	NA	56	8
AXIN2	0	0	843	NA	56	54	20	35	18	69	37	63	33	21	69	52	17	24	69	81	52	7	27	39	0	69	NA	NA	NA	NA	53	8
AXL	0	0	894	NA	69	49	23	41	22	61	50	72	21	26	94	25	20	22	79	56	54	19	26	65	0	79	NA	NA	NA	NA	63	8
AZGP1	0	0	298	NA	19	13	11	18	4	21	20	17	7	9	26	20	5	9	20	19	9	8	18	25	0	20	NA	NA	NA	NA	16	2
AZI1	3	1	1083	PPP:26:28	111	116	28	31	8	142	91	57	22	22	114	66	13	13	54	80	57	8	6	44	3	51	26	0.0240074	28	0.0258541	43	4
AZI2	0	0	392	NA	18	18	23	24	9	37	18	10	13	13	49	37	7	7	18	36	22	4	10	19	0	18	NA	NA	NA	NA	10	4
AZIN1	0	0	448	NA	30	4	26	27	11	34	14	33	10	30	34	29	14	26	18	36	17	4	17	34	0	18	NA	NA	NA	NA	16	1
AZU1	0	0	251	NA	19	24	13	10	8	6	14	29	3	7	28	1	4	12	16	20	15	2	2	18	0	16	NA	NA	NA	NA	16	0
B2M	0	0	122	NA	6	5	5	5	2	9	3	5	4	6	15	9	1	5	5	14	5	2	7	9	0	5	NA	NA	NA	NA	5	0
B3GALNT1	0	0	331	NA	10	16	16	14	6	18	9	12	13	20	41	17	11	22	13	21	18	9	23	22	0	13	NA	NA	NA	NA	11	1
B3GALNT2	3	1	500	PPP:26:28	29	28	23	27	13	34	19	33	13	24	57	19	5	19	27	33	21	16	17	43	3	24	26	0.052	28	0.056	22	1
B3GALT1	0	0	326	NA	13	20	18	15	8	13	6	14	12	24	29	22	10	18	16	25	21	7	16	19	0	16	NA	NA	NA	NA	14	1
B3GALT2	3	1	422	PPP:357:359	21	27	28	12	8	21	16	23	18	25	42	25	9	21	25	27	25	9	24	16	3	22	357	0.845972	359	0.850711	18	2
B3GALT4	0	0	378	NA	34	28	9	10	8	22	19	35	8	8	59	8	3	10	30	27	14	13	8	25	0	30	NA	NA	NA	NA	24	3
B3GALT5	0	0	310	NA	11	18	9	15	9	16	13	15	5	11	36	22	10	26	17	20	18	5	13	21	0	17	NA	NA	NA	NA	11	3
B3GALT6	4	1	329	PPPP:47:50	50	45	2	18	7	20	8	23	7	2	46	7	4	8	18	17	7	10	13	17	4	14	47	0.142857	50	0.151976	12	1
B3GALTL	0	0	498	NA	30	22	11	31	12	28	18	28	16	29	55	37	4	26	30	39	28	11	18	25	0	30	NA	NA	NA	NA	24	3
B3GAT1	3	1	347	PPP:89:91	21	34	13	18	2	22	8	18	9	11	38	13	6	9	30	14	28	9	11	33	3	27	89	0.256484	91	0.262248	25	1
B3GAT2	0	0	323	NA	25	34	10	10	1	16	18	19	8	12	32	14	5	13	29	13	22	7	9	26	0	29	NA	NA	NA	NA	27	1
B3GAT3	4	2	335	PPP:61:63 PPPP:181:184	28	26	5	15	3	22	19	26	7	4	47	13	4	10	34	14	15	7	6	30	7	27	61	0.18209	184	0.549254	23	2
B3GNT1	0	0	415	NA	39	29	18	16	8	28	23	24	9	7	52	14	11	19	27	22	11	6	20	32	0	27	NA	NA	NA	NA	25	1
B3GNT2	0	0	397	NA	13	20	23	23	7	21	15	22	14	23	46	30	10	20	20	27	16	6	18	23	0	20	NA	NA	NA	NA	14	3
B3GNT3	0	0	372	NA	26	28	15	17	9	13	21	18	15	11	52	9	6	23	31	18	19	6	11	24	0	31	NA	NA	NA	NA	21	5
B3GNT4	0	0	378	NA	32	31	6	19	10	11	13	29	14	10	54	12	10	18	34	21	14	9	9	22	0	34	NA	NA	NA	NA	22	6
B3GNT5	0	0	378	NA	23	17	17	23	8	15	19	18	11	27	36	23	12	19	16	24	17	8	26	19	0	16	NA	NA	NA	NA	14	1
B3GNT6	0	0	385	NA	45	37	4	17	11	21	15	28	14	4	49	6	7	20	38	23	12	7	9	18	0	38	NA	NA	NA	NA	30	4
B3GNT7	4	1	401	PPPP:38:41	25	26	18	17	9	17	24	26	13	11	52	19	8	24	29	14	21	8	14	26	4	25	38	0.0947631	41	0.102244	21	2
B3GNT8	0	0	397	NA	43	28	5	17	10	14	16	32	5	7	60	8	2	18	42	29	19	12	12	18	0	42	NA	NA	NA	NA	38	2
B3GNT9	0	0	402	NA	57	39	4	24	6	13	13	39	11	10	48	6	3	23	39	12	15	7	10	23	0	39	NA	NA	NA	NA	35	2
B3GNTL1	0	0	361	NA	24	27	10	18	8	22	21	28	16	17	30	12	6	18	20	27	15	8	7	27	0	20	NA	NA	NA	NA	16	2
B4GALNT1	0	0	533	NA	47	45	11	26	8	24	27	39	10	13	69	12	4	22	38	37	33	7	17	44	0	38	NA	NA	NA	NA	32	3
B4GALNT2	0	0	566	NA	31	33	17	23	9	32	27	46	16	22	67	29	8	35	37	35	27	5	16	51	0	37	NA	NA	NA	NA	37	0
B4GALNT3	0	0	998	NA	58	84	39	54	8	74	62	66	33	31	105	42	17	42	67	67	32	24	31	62	0	67	NA	NA	NA	NA	61	3
B4GALNT4	3	2	1039	PPP:512:514 PPP:521:523	93	107	21	64	9	78	39	83	28	14	102	28	17	48	94	68	37	18	26	65	6	88	512	0.492782	523	0.503369	68	10
B4GALT1	4	1	398	PPPP:84:87	26	27	19	21	7	11	20	33	9	17	42	11	10	15	34	31	15	3	17	30	4	30	84	0.211055	87	0.218593	30	0
B4GALT2	0	0	401	NA	28	34	14	20	10	15	13	34	13	19	40	11	9	20	38	25	15	5	14	24	0	38	NA	NA	NA	NA	28	5
B4GALT3	0	0	393	NA	25	37	16	18	5	17	15	37	16	9	46	7	9	12	41	24	15	4	18	22	0	41	NA	NA	NA	NA	33	4
B4GALT4	0	0	344	NA	14	22	20	13	6	24	12	23	13	11	43	25	6	19	13	17	15	6	16	26	0	13	NA	NA	NA	NA	13	0
B4GALT5	0	0	388	NA	20	27	22	22	4	18	17	26	13	17	43	15	12	26	21	20	17	6	21	21	0	21	NA	NA	NA	NA	21	0
B4GALT6	0	0	382	NA	13	25	24	19	5	21	10	25	13	21	38	19	13	26	23	19	14	6	25	23	0	23	NA	NA	NA	NA	23	0
B4GALT7	3	1	327	PPP:79:81	21	28	9	15	8	18	11	26	15	9	36	14	5	20	22	21	12	8	10	19	3	19	79	0.24159	81	0.247706	15	2
B9D1	0	0	204	NA	8	10	5	11	2	8	13	18	2	5	11	9	5	13	18	16	14	4	9	23	0	18	NA	NA	NA	NA	16	1
B9D2	0	0	175	NA	13	10	1	7	5	6	11	24	10	8	17	3	2	8	8	12	9	7	5	9	0	8	NA	NA	NA	NA	8	0
BAALC	0	0	180	NA	16	9	8	10	4	13	7	14	2	6	10	11	5	2	16	20	15	2	3	7	0	16	NA	NA	NA	NA	14	1
BAAT	0	0	418	NA	34	19	14	13	3	26	22	37	17	20	54	16	7	21	25	23	19	5	14	29	0	25	NA	NA	NA	NA	21	2
BABAM1	3	2	329	PPP:76:78 PPP:206:208	24	12	11	13	9	42	12	15	7	10	27	16	10	12	26	31	19	3	8	22	6	20	76	0.231003	208	0.632219	18	1
BACE1	0	0	501	NA	34	25	15	27	12	28	22	43	10	28	49	16	14	22	28	33	28	10	20	37	0	28	NA	NA	NA	NA	26	1
BACE2	0	0	518	NA	52	23	19	20	8	27	16	42	3	31	58	14	9	25	35	43	30	10	19	34	0	35	NA	NA	NA	NA	33	1
BACH1	0	0	736	NA	41	35	23	47	34	69	49	32	13	28	70	47	9	26	38	85	41	2	13	34	0	38	NA	NA	NA	NA	32	3
BACH2	0	0	841	NA	56	50	27	48	38	75	43	48	14	24	70	39	18	26	67	92	45	3	18	40	0	67	NA	NA	NA	NA	57	5
BAD	0	0	168	NA	13	16	2	8	0	13	11	19	6	2	7	4	4	6	15	27	5	5	2	3	0	15	NA	NA	NA	NA	13	1
BAG1	3	1	345	PPP:41:43	26	34	7	12	4	46	23	21	5	11	33	25	6	7	18	25	23	1	0	18	3	15	41	0.118841	43	0.124638	11	2
BAG2	0	0	211	NA	17	16	12	10	3	22	14	8	5	13	24	14	6	4	3	21	8	0	1	10	0	3	NA	NA	NA	NA	3	0
BAG3	4	2	575	PPPP:355:358 PPP:374:376	59	31	13	22	3	42	41	36	19	17	24	28	10	7	88	55	28	4	10	38	7	81	355	0.617391	376	0.653913	67	7
BAG4	4	1	457	PPPP:32:35	23	19	17	18	4	28	29	48	7	7	24	13	6	2	67	57	23	9	35	21	4	63	32	0.0700219	35	0.0765864	43	10
BAG5	0	0	488	NA	28	31	25	26	12	54	27	21	12	34	59	38	7	11	14	27	21	4	10	27	0	14	NA	NA	NA	NA	14	0
BAG6	12	10	1162	PPP:196:198 PPP:388:390 PPP:397:399 PPP:422:424 PPP:428:430 PPP:594:596 PPP:624:626 PPPPPPPPPPPP:687:698 PPP:706:708 PPP:1018:1020	115	59	36	30	8	73	85	104	30	35	100	13	35	27	155	95	68	3	14	77	39	116	196	0.168675	1020	0.877797	92	12
BAHD1	0	0	780	NA	64	68	17	25	21	55	27	67	22	6	75	35	13	11	112	69	32	9	18	34	0	112	NA	NA	NA	NA	94	9
BAI1	12	3	1584	PPP:859:861 PPPPPPPPPPPP:1411:1422 PPPP:1427:1430	129	114	47	71	61	90	70	128	24	51	152	59	22	53	132	125	92	37	28	99	19	113	859	0.542298	1430	0.902778	91	11
BAI2	4	3	1585	PPP:829:831 PPPP:1315:1318 PPPP:1425:1428	135	105	36	57	65	95	57	126	30	35	160	49	35	56	127	155	96	35	34	97	11	116	829	0.523028	1428	0.900946	94	11
BAI3	0	0	1522	NA	80	80	78	65	61	94	73	88	37	74	141	73	48	63	72	131	105	32	35	92	0	72	NA	NA	NA	NA	66	3
BAIAP2	3	1	552	PPP:467:469	52	30	21	29	5	35	33	36	9	12	53	43	15	16	33	59	24	4	19	24	3	30	467	0.846014	469	0.849638	26	2
BAIAP2L2	3	1	529	PPP:468:470	39	48	20	16	2	38	23	35	13	10	52	17	21	17	47	64	23	5	16	23	3	44	468	0.884688	470	0.888469	38	3
BAIAP3	0	0	1187	NA	114	82	22	64	23	87	59	76	34	26	168	48	18	44	68	83	52	18	24	77	0	68	NA	NA	NA	NA	62	3
BAK1	0	0	211	NA	18	13	6	6	2	14	17	21	6	8	21	2	5	12	11	10	9	3	7	20	0	11	NA	NA	NA	NA	9	1
BAMBI	0	0	260	NA	17	15	9	13	15	12	13	17	14	11	34	12	10	5	7	23	11	3	7	12	0	7	NA	NA	NA	NA	5	1
BANF1	0	0	89	NA	6	5	1	7	4	8	3	9	1	1	10	9	2	6	2	3	3	2	1	6	0	2	NA	NA	NA	NA	2	0
BANF2	0	0	97	NA	7	4	4	3	7	9	4	6	3	6	12	6	4	5	2	4	4	3	1	3	0	2	NA	NA	NA	NA	2	0
BANK1	3	1	785	PPP:512:514	42	32	34	37	17	91	34	42	23	50	65	63	16	31	53	57	38	7	23	30	3	50	512	0.652229	514	0.654777	42	4
BANP	3	1	519	PPP:353:355	41	21	21	29	12	32	50	31	18	30	45	19	10	5	34	46	25	3	8	39	3	31	353	0.680154	355	0.684008	31	0
BAP1	0	0	729	NA	51	47	30	40	8	58	30	48	19	32	66	45	10	19	55	70	31	4	16	50	0	55	NA	NA	NA	NA	49	3
BARD1	0	0	777	NA	39	45	39	40	26	48	30	43	20	34	76	64	13	18	50	88	32	10	17	45	0	50	NA	NA	NA	NA	44	3
BARHL1	4	2	327	PPP:286:288 PPPP:309:312	34	26	6	18	5	16	16	25	4	7	37	14	3	7	38	40	11	2	9	9	7	31	286	0.874618	312	0.954128	27	2
BARHL2	6	2	387	PPPP:94:97 PPPPPP:120:125	37	22	7	17	3	18	28	20	16	10	31	16	10	9	50	46	26	2	8	11	10	40	94	0.242894	125	0.322997	32	4
BARX1	0	0	254	NA	33	18	2	6	2	22	12	26	5	5	29	21	4	8	26	14	9	2	3	7	0	26	NA	NA	NA	NA	22	2
BARX2	3	1	279	PPP:275:277	19	16	3	6	6	28	22	12	5	9	29	22	7	4	30	26	16	2	6	11	3	27	275	0.985663	277	0.992832	23	2
BASP1	0	0	227	NA	57	0	3	8	0	43	7	17	0	0	1	32	1	0	28	15	10	0	1	4	0	28	NA	NA	NA	NA	26	1
BATF	3	1	125	PPP:16:18	9	10	3	7	1	9	10	1	6	2	9	8	1	4	11	20	5	0	2	7	3	8	16	0.128	18	0.144	6	1
BATF2	0	0	274	NA	25	11	4	9	8	13	27	19	13	1	43	11	2	4	31	31	10	4	1	7	0	31	NA	NA	NA	NA	27	2
BATF3	0	0	127	NA	9	12	4	5	3	13	12	5	3	1	13	10	4	1	14	6	4	0	1	7	0	14	NA	NA	NA	NA	12	1
BAX	0	0	218	NA	18	16	4	13	3	10	9	18	3	8	25	8	7	11	19	15	10	7	2	12	0	19	NA	NA	NA	NA	13	3
BAZ1A	0	0	1556	NA	85	121	45	100	29	170	79	61	31	71	145	134	17	58	80	140	72	10	33	75	0	80	NA	NA	NA	NA	66	7
BAZ1B	0	0	1483	NA	90	104	47	78	28	174	56	64	41	47	144	168	34	38	75	105	67	16	33	74	0	75	NA	NA	NA	NA	63	6
BAZ2A	3	1	1905	PPP:1338:1340	127	122	57	82	34	166	107	118	38	53	180	109	44	60	167	191	98	23	28	101	3	164	1338	0.702362	1340	0.703412	144	10
BAZ2B	0	0	2168	NA	138	113	95	136	31	193	120	126	44	84	184	193	45	57	117	240	113	17	23	99	0	117	NA	NA	NA	NA	103	7
BBC3	3	1	261	PPP:246:248	35	37	0	7	8	3	11	43	7	1	17	1	3	3	48	13	13	2	0	9	3	45	246	0.942529	248	0.950192	41	2
BBIP1	0	0	103	NA	8	8	5	1	2	3	5	9	1	4	10	8	1	3	6	11	5	1	7	5	0	6	NA	NA	NA	NA	6	0
BBOX1	0	0	387	NA	23	20	15	31	9	22	18	22	11	19	37	29	6	21	13	20	19	9	16	27	0	13	NA	NA	NA	NA	11	1
BBS1	3	1	593	PPP:417:419	56	31	22	22	8	37	23	36	15	21	88	30	15	19	38	39	35	3	15	40	3	35	417	0.703204	419	0.706577	33	1
BBS10	0	0	723	NA	34	29	29	27	22	39	36	41	24	46	87	40	20	26	31	65	48	3	26	50	0	31	NA	NA	NA	NA	29	1
BBS12	0	0	710	NA	38	28	42	27	22	46	35	35	21	39	85	30	10	27	20	70	46	8	18	63	0	20	NA	NA	NA	NA	20	0
BBS2	0	0	721	NA	52	40	43	46	11	40	23	49	24	49	75	28	16	28	23	57	42	4	20	51	0	23	NA	NA	NA	NA	21	1
BBS4	0	0	527	NA	54	11	27	16	8	37	34	24	13	21	67	43	12	19	25	33	24	6	24	29	0	25	NA	NA	NA	NA	21	2
BBS5	0	0	544	NA	34	24	26	37	8	31	17	36	9	35	55	40	12	23	19	44	25	10	17	42	0	19	NA	NA	NA	NA	17	1
BBS7	0	0	715	NA	34	26	30	47	13	47	37	43	19	50	75	52	12	29	27	54	41	3	25	51	0	27	NA	NA	NA	NA	23	2
BBS9	0	0	887	NA	45	38	33	54	21	55	56	52	20	39	110	46	17	41	38	74	53	9	20	66	0	38	NA	NA	NA	NA	36	1
BBX	0	0	941	NA	57	45	28	56	19	92	32	53	22	34	63	124	24	28	64	97	53	9	8	33	0	64	NA	NA	NA	NA	58	3
BCAM	3	1	628	PPP:588:590	50	42	16	30	14	43	24	61	16	8	69	15	11	12	47	57	41	8	14	50	3	44	588	0.936306	590	0.93949	38	3
BCAN	3	2	911	PPP:64:66 PPP:817:819	85	63	22	44	26	96	34	84	13	21	82	13	8	23	87	68	39	15	32	56	6	81	64	0.0702525	819	0.899012	71	5
BCAP29	0	0	348	NA	18	18	16	10	7	23	17	11	8	24	39	39	13	24	6	26	18	5	9	17	0	6	NA	NA	NA	NA	4	1
BCAP31	0	0	313	NA	31	14	12	12	3	29	14	18	4	10	44	28	7	12	7	25	11	3	6	23	0	7	NA	NA	NA	NA	7	0
BCAR1	3	3	916	PPP:397:399 PPP:411:413 PPP:459:461	91	40	15	53	6	49	62	77	23	14	87	36	10	21	116	67	45	8	28	68	9	107	397	0.433406	461	0.503275	69	19
BCAR3	3	3	825	PPP:58:60 PPP:403:405 PPP:817:819	56	59	33	37	17	62	42	46	22	29	86	44	25	27	65	70	40	9	15	41	9	56	58	0.070303	819	0.992727	50	3
BCAS1	0	0	614	NA	55	16	21	41	6	52	35	49	8	10	34	70	8	18	48	58	42	4	3	36	0	48	NA	NA	NA	NA	44	2
BCAS2	0	0	225	NA	20	14	16	7	2	26	17	9	6	11	20	12	8	4	7	11	8	4	10	13	0	7	NA	NA	NA	NA	7	0
BCAS3	3	1	935	PPP:550:552	48	49	31	43	22	50	41	69	29	41	74	32	25	34	76	103	67	11	18	72	3	73	550	0.588235	552	0.590374	63	5
BCAS4	0	0	211	NA	24	18	4	10	4	18	7	18	5	7	25	5	6	6	15	13	10	1	1	14	0	15	NA	NA	NA	NA	15	0
BCAT1	0	0	398	NA	24	16	15	19	10	29	12	33	7	18	44	21	9	16	23	28	26	9	12	27	0	23	NA	NA	NA	NA	21	1
BCAT2	0	0	392	NA	23	25	10	14	7	23	20	33	9	15	51	18	13	16	28	17	17	11	10	32	0	28	NA	NA	NA	NA	26	1
BCCIP	0	0	322	NA	16	12	16	25	5	37	20	19	3	14	31	26	6	14	16	21	14	0	6	21	0	16	NA	NA	NA	NA	10	3
BCDIN3D	0	0	292	NA	16	19	8	16	10	20	11	18	13	13	40	12	6	19	20	21	11	4	4	11	0	20	NA	NA	NA	NA	16	2
BCHE	0	0	602	NA	34	24	40	24	10	37	20	47	10	31	55	37	13	42	30	39	37	19	20	33	0	30	NA	NA	NA	NA	28	1
BCKDHA	0	0	448	NA	41	32	18	24	6	28	27	30	13	24	32	18	12	18	28	31	16	6	23	21	0	28	NA	NA	NA	NA	26	1
BCKDHB	0	0	392	NA	42	21	9	18	12	25	15	31	9	29	28	16	4	23	25	20	18	6	12	29	0	25	NA	NA	NA	NA	25	0
BCKDK	0	0	412	NA	32	35	8	27	5	19	14	28	20	28	49	17	11	15	24	24	22	1	13	20	0	24	NA	NA	NA	NA	22	1
BCL10	0	0	233	NA	9	17	12	11	5	26	5	9	4	9	29	15	3	8	16	25	19	0	3	8	0	16	NA	NA	NA	NA	12	2
BCL11A	3	2	835	PPP:268:270 PPP:367:369	47	46	24	41	25	71	27	68	38	23	70	49	19	27	81	97	36	4	12	30	6	75	268	0.320958	369	0.441916	51	12
BCL11B	3	5	894	PPP:98:100 PPP:266:268 PPP:319:321 PPP:377:379 PPP:418:420	66	49	25	43	27	66	31	97	33	22	84	44	19	30	98	83	34	3	12	28	15	83	98	0.10962	420	0.469799	67	8
BCL2	0	0	239	NA	27	17	6	12	2	10	6	22	9	7	22	4	7	12	19	15	12	6	8	16	0	19	NA	NA	NA	NA	15	2
BCL2A1	0	0	175	NA	6	6	10	7	5	14	11	12	0	13	14	13	5	11	5	9	9	4	6	15	0	5	NA	NA	NA	NA	5	0
BCL2L1	0	0	233	NA	21	14	12	10	1	21	10	18	4	6	19	6	6	13	7	23	11	7	6	18	0	7	NA	NA	NA	NA	7	0
BCL2L10	0	0	204	NA	21	21	1	8	4	10	10	14	3	2	30	4	4	12	13	10	14	7	5	11	0	13	NA	NA	NA	NA	13	0
BCL2L11	0	0	198	NA	17	20	6	9	4	11	12	12	5	6	14	2	8	8	24	21	6	2	6	5	0	24	NA	NA	NA	NA	18	3
BCL2L12	4	1	334	PPPP:269:272	30	39	2	9	8	27	11	26	4	7	42	6	4	11	45	27	7	7	3	19	4	41	269	0.805389	272	0.814371	31	5
BCL2L13	0	0	485	NA	37	10	9	14	2	67	22	24	9	18	60	23	8	9	36	58	29	5	9	36	0	36	NA	NA	NA	NA	32	2
BCL2L14	3	1	327	PPP:165:167	20	11	10	17	6	26	20	21	9	16	28	28	4	13	13	34	15	7	7	22	3	10	165	0.504587	167	0.510703	10	0
BCL2L15	0	0	163	NA	15	5	7	7	5	15	11	12	1	11	15	5	6	6	4	13	9	2	2	12	0	4	NA	NA	NA	NA	4	0
BCL2L2	0	0	193	NA	30	12	3	8	2	13	10	21	3	1	17	4	4	12	8	9	11	5	4	16	0	8	NA	NA	NA	NA	8	0
BCL3	0	0	454	NA	52	34	16	22	7	13	12	35	13	9	60	5	12	7	63	41	20	0	7	26	0	63	NA	NA	NA	NA	51	6
BCL6	0	0	706	NA	53	45	34	24	32	52	25	27	28	24	56	38	19	24	65	74	34	1	22	29	0	65	NA	NA	NA	NA	49	8
BCL6B	3	1	479	PPP:156:158	40	34	9	12	19	23	19	42	23	12	42	19	3	15	49	55	25	1	15	22	3	46	156	0.325678	158	0.329854	38	4
BCL7A	0	0	231	NA	17	12	11	18	1	22	11	15	3	8	5	22	9	0	15	36	8	3	1	14	0	15	NA	NA	NA	NA	13	1
BCL7B	0	0	202	NA	12	9	6	14	1	22	10	5	1	4	12	15	2	5	18	33	13	3	1	16	0	18	NA	NA	NA	NA	12	3
BCL7C	0	0	242	NA	16	34	4	10	0	23	7	29	2	6	16	12	5	2	28	16	15	3	0	14	0	28	NA	NA	NA	NA	22	3
BCL9	5	3	1426	PPPPP:331:335 PPPP:514:517 PPPP:970:973	78	58	70	46	4	53	98	166	33	43	78	49	90	34	249	151	57	4	8	57	13	236	331	0.232118	973	0.682328	188	24
BCL9L	6	8	1499	PPP:213:215 PPP:303:305 PPPPPP:307:312 PPPP:448:451 PPPP:560:563 PPPPPP:1125:1130 PPP:1170:1172 PPP:1462:1464	88	65	69	39	7	60	118	183	35	19	119	41	103	20	256	142	59	5	16	55	32	224	213	0.142095	1464	0.976651	146	39
BCLAF1	0	0	920	NA	32	114	27	55	2	86	31	58	31	20	30	92	9	29	49	151	42	6	32	24	0	49	NA	NA	NA	NA	45	2
BCMO1	0	0	547	NA	37	27	24	35	9	34	17	26	17	33	44	35	11	26	28	33	38	8	29	36	0	28	NA	NA	NA	NA	28	0
BCO2	0	0	579	NA	32	28	31	26	11	33	19	46	18	29	42	38	12	41	33	33	30	8	25	44	0	33	NA	NA	NA	NA	31	1
BCOR	3	1	1755	PPP:248:250	134	93	72	96	27	130	62	104	42	46	153	110	29	40	177	184	90	15	51	100	3	174	248	0.141311	250	0.14245	140	17
BCORL1	3	1	1785	PPP:453:455	141	91	50	76	33	106	83	114	31	37	159	97	28	38	223	207	116	14	24	117	3	220	453	0.253782	455	0.254902	186	17
BCR	3	1	1271	PPP:107:109	85	89	42	69	18	106	65	76	24	44	117	81	29	48	81	123	55	12	34	73	3	78	107	0.0841857	109	0.0857592	64	7
BCS1L	0	0	419	NA	30	35	13	20	3	23	20	31	11	16	51	11	8	20	21	29	23	8	17	29	0	21	NA	NA	NA	NA	19	1
BDH1	0	0	343	NA	24	22	9	14	7	21	4	25	6	16	31	22	13	12	17	32	22	5	14	27	0	17	NA	NA	NA	NA	17	0
BDH2	0	0	245	NA	26	12	12	13	6	14	12	18	2	17	19	16	7	9	6	14	13	2	5	22	0	6	NA	NA	NA	NA	6	0
BDKRB1	0	0	353	NA	30	24	18	8	9	12	16	13	7	24	54	7	2	32	17	21	13	11	6	29	0	17	NA	NA	NA	NA	15	1
BDKRB2	0	0	391	NA	18	18	17	10	14	16	17	18	4	29	51	13	17	22	13	35	24	12	9	34	0	13	NA	NA	NA	NA	11	1
BDNF	0	0	329	NA	19	22	12	14	12	20	12	23	10	13	28	22	11	12	12	22	24	4	11	26	0	12	NA	NA	NA	NA	10	1
BDP1	0	0	2624	NA	125	159	130	138	29	357	122	118	35	120	176	222	52	49	164	250	183	3	22	170	0	164	NA	NA	NA	NA	156	4
BEAN1	3	2	259	PPP:121:123 PPP:166:168	13	26	1	14	6	12	8	21	20	9	17	1	3	3	31	31	15	1	12	15	6	25	121	0.467181	168	0.648649	19	3
BECN1	0	0	450	NA	21	22	24	24	9	51	32	24	6	14	49	29	13	21	13	29	30	7	11	21	0	13	NA	NA	NA	NA	11	1
BEGAIN	0	0	593	NA	65	41	9	31	11	54	25	41	13	9	58	27	9	17	48	66	25	2	24	18	0	48	NA	NA	NA	NA	42	3
BEND2	0	0	799	NA	55	39	56	47	19	46	34	41	17	31	58	30	20	22	60	98	49	9	26	42	0	60	NA	NA	NA	NA	50	5
BEND3	3	1	828	PPP:242:244	40	57	31	57	20	75	43	40	15	29	91	50	10	35	54	73	25	7	25	51	3	51	242	0.292271	244	0.294686	43	4
BEND4	7	3	534	PPPPPPP:55:61 PPP:75:77 PPP:119:121	39	28	15	21	11	41	36	35	17	14	40	21	9	15	50	69	25	4	16	28	13	37	55	0.102996	121	0.226592	35	1
BEND5	0	0	421	NA	27	28	15	25	7	46	21	19	9	15	46	36	8	6	23	27	12	4	15	32	0	23	NA	NA	NA	NA	19	2
BEND6	0	0	279	NA	16	12	22	13	4	23	19	11	2	11	22	27	10	7	11	32	21	2	3	11	0	11	NA	NA	NA	NA	11	0
BEND7	0	0	519	NA	27	33	21	21	10	34	37	34	12	20	51	36	9	16	33	56	30	4	6	29	0	33	NA	NA	NA	NA	23	5
BEST1	0	0	604	NA	37	27	26	27	7	36	27	32	23	20	76	29	15	34	47	40	31	16	20	34	0	47	NA	NA	NA	NA	43	2
BEST2	3	1	509	PPP:463:465	44	32	13	28	13	29	17	37	4	16	65	14	13	32	36	27	21	10	22	36	3	33	463	0.909627	465	0.913556	31	1
BEST3	0	0	668	NA	31	40	19	37	7	37	20	35	17	30	72	26	19	37	44	71	46	15	26	39	0	44	NA	NA	NA	NA	38	3
BEST4	0	0	473	NA	41	35	12	24	5	30	23	27	4	16	60	15	8	25	32	33	20	8	21	34	0	32	NA	NA	NA	NA	26	3
BET1	0	0	133	NA	5	4	6	2	3	9	3	11	4	9	16	9	5	9	4	15	7	1	6	4	0	4	NA	NA	NA	NA	2	1
BET1L	0	0	152	NA	13	15	6	13	2	7	11	9	6	4	9	8	4	4	10	15	5	2	2	7	0	10	NA	NA	NA	NA	6	2
BET3L	0	0	181	NA	10	11	7	11	7	13	4	12	4	12	20	15	4	7	5	11	7	0	9	12	0	5	NA	NA	NA	NA	5	0
BEX1	0	0	125	NA	7	15	7	5	2	18	7	5	6	2	11	6	8	2	8	6	1	1	2	6	0	8	NA	NA	NA	NA	6	1
BEX2	0	0	160	NA	8	17	10	7	5	23	8	8	7	5	12	8	8	2	10	5	2	1	2	12	0	10	NA	NA	NA	NA	8	1
BEX4	0	0	120	NA	6	14	11	4	1	17	9	11	5	5	5	4	5	4	7	2	3	1	2	4	0	7	NA	NA	NA	NA	7	0
BEX5	0	0	111	NA	5	8	6	10	1	13	3	11	4	5	8	5	6	3	11	1	0	1	2	8	0	11	NA	NA	NA	NA	7	2
BFAR	0	0	450	NA	23	24	16	16	11	35	18	16	10	21	63	22	7	26	23	33	22	19	16	29	0	23	NA	NA	NA	NA	21	1
BFSP1	0	0	665	NA	57	49	12	33	5	93	43	38	11	29	62	47	5	9	37	43	37	1	16	38	0	37	NA	NA	NA	NA	29	4
BFSP2	0	0	415	NA	45	33	11	16	6	47	29	28	11	11	51	16	10	4	11	35	16	4	6	25	0	11	NA	NA	NA	NA	9	1
BGLAP	0	0	100	NA	14	8	1	4	3	8	4	8	1	2	12	4	1	3	9	5	1	1	5	6	0	9	NA	NA	NA	NA	9	0
BGN	0	0	368	NA	14	18	26	22	7	19	11	24	11	18	55	23	8	16	24	24	12	4	11	21	0	24	NA	NA	NA	NA	22	1
BHLHA15	0	0	189	NA	17	24	6	4	0	12	14	19	5	6	15	10	3	2	19	13	12	0	4	4	0	19	NA	NA	NA	NA	17	1
BHLHA9	4	2	235	PPPP:152:155 PPP:216:218	39	32	4	8	7	10	1	31	6	4	19	5	3	1	31	20	4	2	2	6	7	24	152	0.646809	218	0.92766	22	1
BHLHB9	0	0	547	NA	55	24	31	18	13	51	14	28	10	34	33	46	14	20	34	40	33	8	6	35	0	34	NA	NA	NA	NA	30	2
BHLHE22	3	2	381	PPP:48:50 PPP:78:80	57	18	7	13	8	19	8	65	7	5	40	14	6	5	29	58	4	0	6	12	6	23	48	0.125984	80	0.209974	17	3
BHLHE23	0	0	225	NA	43	22	5	11	5	11	9	21	5	4	23	7	4	5	19	15	5	0	6	5	0	19	NA	NA	NA	NA	19	0
BHLHE40	3	1	412	PPP:9:11	24	20	9	19	8	28	22	27	15	15	47	30	10	11	42	39	19	1	10	16	3	39	9	0.0218447	11	0.026699	31	4
BHLHE41	3	1	482	PPP:421:423	82	22	5	20	9	29	24	39	15	12	56	26	4	14	53	29	19	1	10	13	3	50	421	0.873444	423	0.877593	48	1
BHMT	0	0	406	NA	40	20	11	13	8	40	16	37	10	17	31	31	9	17	24	18	16	7	12	29	0	24	NA	NA	NA	NA	18	3
BHMT2	0	0	363	NA	37	22	7	17	9	35	8	34	9	16	29	21	10	16	21	17	11	9	10	25	0	21	NA	NA	NA	NA	19	1
BICC1	3	1	974	PPP:545:547	76	41	45	36	11	57	44	72	27	45	90	61	30	23	64	123	62	6	16	45	3	61	545	0.559548	547	0.561602	59	1
BICD1	0	0	975	NA	67	56	41	44	10	118	63	32	24	38	113	80	21	13	43	75	64	0	25	48	0	43	NA	NA	NA	NA	31	6
BICD2	0	0	855	NA	79	60	31	38	8	115	54	36	20	27	109	62	16	11	25	63	45	1	21	34	0	25	NA	NA	NA	NA	23	1
BID	0	0	241	NA	21	25	13	15	6	15	10	16	6	8	30	4	8	5	8	22	10	3	3	13	0	8	NA	NA	NA	NA	6	1
BIK	0	0	160	NA	9	9	2	13	3	15	4	8	2	5	35	2	10	5	8	13	6	2	2	7	0	8	NA	NA	NA	NA	6	1
BIN1	4	1	593	PPPP:342:345	56	15	24	29	4	56	40	39	11	12	50	44	9	20	54	41	34	9	8	38	4	50	342	0.576728	345	0.581788	42	4
BIN2	4	1	565	PPPP:417:420	47	25	27	18	3	70	30	25	8	16	42	42	8	11	44	73	32	3	10	31	4	40	417	0.738053	420	0.743363	34	3
BIN3	0	0	253	NA	16	19	7	17	1	26	21	7	4	9	27	24	9	10	11	16	7	1	7	14	0	11	NA	NA	NA	NA	11	0
BIRC2	0	0	618	NA	33	31	31	31	22	43	24	30	13	29	57	38	20	28	33	63	32	8	20	32	0	33	NA	NA	NA	NA	31	1
BIRC3	0	0	604	NA	35	33	36	30	22	44	25	27	14	28	58	29	13	29	29	55	34	7	19	37	0	29	NA	NA	NA	NA	29	0
BIRC5	0	0	165	NA	15	9	6	7	7	20	4	12	4	6	12	15	3	11	11	5	11	3	1	3	0	11	NA	NA	NA	NA	9	1
BIRC6	3	4	4857	PPP:1772:1774 PPP:1849:1851 PPP:3568:3570 PPP:4140:4142	364	183	190	242	110	285	245	277	144	222	622	226	105	130	270	489	306	47	88	312	12	258	1772	0.364834	4142	0.85279	226	16
BIRC7	0	0	298	NA	27	23	0	14	13	26	15	27	9	3	27	7	2	11	30	21	11	10	3	19	0	30	NA	NA	NA	NA	26	2
BIRC8	0	0	236	NA	14	12	8	10	10	21	13	13	6	14	19	19	8	9	10	11	15	4	7	13	0	10	NA	NA	NA	NA	10	0
BIVM	0	0	503	NA	26	27	29	20	13	30	22	38	19	29	34	39	4	19	30	54	27	10	21	12	0	30	NA	NA	NA	NA	24	3
BLACE	3	1	179	PPP:68:70	12	11	3	7	4	15	5	15	3	4	20	3	3	7	17	24	8	6	2	10	3	14	68	0.379888	70	0.391061	14	0
BLCAP	0	0	87	NA	5	1	2	2	7	2	1	4	3	3	17	2	3	7	8	7	2	3	4	4	0	8	NA	NA	NA	NA	8	0
BLID	0	0	108	NA	7	6	4	0	2	11	3	6	2	6	17	5	3	2	7	11	5	1	4	6	0	7	NA	NA	NA	NA	7	0
BLK	4	1	590	PPPP:49:52	42	48	15	26	13	39	22	42	8	24	55	37	15	20	45	42	27	10	19	41	4	41	49	0.0830508	52	0.0881356	35	3
BLM	3	1	1417	PPP:209:211	75	65	72	103	30	85	59	61	35	68	126	123	28	57	66	157	90	9	34	74	3	63	209	0.147495	211	0.148906	57	3
BLMH	0	0	455	NA	23	20	25	26	11	36	18	25	13	19	39	33	18	26	20	23	21	9	15	35	0	20	NA	NA	NA	NA	18	1
BLNK	3	3	456	PPP:98:100 PPP:198:200 PPP:237:239	33	23	22	23	3	35	20	19	12	16	24	37	6	11	57	50	22	4	13	26	9	48	98	0.214912	239	0.524123	38	5
BLOC1S1	0	0	153	NA	16	13	6	5	1	13	14	9	3	5	13	9	5	3	6	9	8	2	3	10	0	6	NA	NA	NA	NA	6	0
BLOC1S2	0	0	142	NA	22	5	6	10	1	17	5	3	0	6	17	15	5	1	3	6	8	0	8	4	0	3	NA	NA	NA	NA	3	0
BLOC1S3	0	0	202	NA	36	25	0	10	2	23	5	16	2	2	20	1	1	0	21	14	9	1	2	12	0	21	NA	NA	NA	NA	19	1
BLVRA	0	0	296	NA	17	15	10	7	5	35	11	21	7	11	39	23	6	16	9	26	6	3	6	23	0	9	NA	NA	NA	NA	9	0
BLVRB	0	0	206	NA	20	11	2	15	2	5	9	17	9	7	18	9	6	3	12	11	18	1	6	25	0	12	NA	NA	NA	NA	8	2
BLZF1	0	0	400	NA	25	23	23	11	6	39	22	19	12	15	46	32	8	9	18	32	26	3	4	27	0	18	NA	NA	NA	NA	16	1
BMF	0	0	184	NA	12	9	7	7	6	14	22	13	6	4	24	2	2	7	19	10	6	3	2	9	0	19	NA	NA	NA	NA	17	1
BMI1	0	0	326	NA	15	24	17	22	10	17	8	15	10	21	22	23	10	10	21	33	21	1	12	14	0	21	NA	NA	NA	NA	21	0
BMP1	0	0	986	NA	48	67	32	68	41	64	33	86	27	36	58	58	10	52	53	80	51	16	43	63	0	53	NA	NA	NA	NA	47	3
BMP10	0	0	424	NA	22	19	20	28	9	38	14	22	10	26	45	24	12	16	19	39	19	4	16	22	0	19	NA	NA	NA	NA	15	2
BMP15	0	0	392	NA	19	32	18	10	9	25	20	22	17	22	49	14	12	14	25	32	16	7	11	18	0	25	NA	NA	NA	NA	23	1
BMP2	0	0	396	NA	28	31	16	15	8	26	16	22	21	12	39	19	7	17	25	35	17	5	8	29	0	25	NA	NA	NA	NA	21	2
BMP2K	0	0	1161	NA	70	50	52	62	15	76	116	77	43	40	80	66	22	51	85	108	59	5	23	61	0	85	NA	NA	NA	NA	73	6
BMP2KL	0	0	409	NA	18	18	15	29	2	34	35	23	13	10	28	30	6	23	32	41	24	1	4	22	0	32	NA	NA	NA	NA	30	1
BMP3	0	0	472	NA	32	35	17	16	12	30	23	28	10	22	46	37	7	17	33	43	19	9	13	23	0	33	NA	NA	NA	NA	31	1
BMP4	0	0	408	NA	23	37	18	15	8	29	19	27	23	17	39	14	8	13	24	30	18	6	11	29	0	24	NA	NA	NA	NA	20	2
BMP5	0	0	454	NA	31	33	29	23	9	23	19	24	17	21	40	23	10	22	22	38	20	6	16	28	0	22	NA	NA	NA	NA	20	1
BMP6	3	4	513	PPP:24:26 PPP:56:58 PPP:124:126 PPP:174:176	42	35	20	24	12	26	38	34	17	11	48	19	11	18	42	45	17	10	13	31	12	30	24	0.0467836	176	0.34308	26	2
BMP7	0	0	431	NA	34	31	21	19	7	27	20	22	21	17	40	16	11	26	23	35	15	6	14	26	0	23	NA	NA	NA	NA	21	1
BMP8A	3	1	402	PPP:27:29	37	39	11	23	11	18	18	30	13	9	49	11	9	14	33	23	12	6	9	27	3	30	27	0.0671642	29	0.0721393	28	1
BMP8B	3	1	402	PPP:27:29	37	38	10	24	11	18	17	30	14	9	50	10	10	14	33	23	12	6	9	27	3	30	27	0.0671642	29	0.0721393	28	1
BMPER	0	0	685	NA	27	37	28	28	79	40	32	55	18	23	46	43	7	27	41	43	36	10	15	50	0	41	NA	NA	NA	NA	37	2
BMPR1A	0	0	532	NA	31	29	21	29	23	30	22	34	11	40	51	32	16	17	20	38	28	8	23	29	0	20	NA	NA	NA	NA	18	1
BMPR1B	0	0	532	NA	21	32	19	28	19	36	18	33	17	33	59	32	15	16	26	41	32	9	18	28	0	26	NA	NA	NA	NA	18	4
BMPR2	3	1	1038	PPP:132:134	59	58	68	50	23	73	44	60	26	46	91	46	28	20	63	99	81	12	28	63	3	60	132	0.127168	134	0.129094	56	2
BMS1	3	1	1282	PPP:80:82	81	72	43	96	15	128	55	82	34	60	110	132	34	51	56	82	50	10	27	64	3	53	80	0.0624025	82	0.0639626	51	1
BMX	0	0	675	NA	27	29	30	31	13	49	35	33	21	25	59	61	17	26	29	71	24	12	37	46	0	29	NA	NA	NA	NA	27	1
BNC1	3	1	994	PPP:452:454	52	55	44	41	28	73	54	50	41	43	82	56	26	36	71	118	49	4	20	51	3	68	452	0.454728	454	0.45674	60	4
BNC2	4	2	1099	PPP:8:10 PPPP:605:608	56	64	54	64	25	77	37	59	44	45	92	55	37	32	81	126	62	5	26	58	7	74	8	0.00727934	608	0.55323	64	5
BNIP1	0	0	271	NA	18	14	9	12	3	19	23	6	4	15	37	22	7	14	6	22	22	2	4	12	0	6	NA	NA	NA	NA	6	0
BNIP2	5	1	435	PPPPP:11:15	27	29	13	34	5	41	13	31	4	24	42	22	11	13	35	29	16	7	13	26	5	30	11	0.0252874	15	0.0344828	28	1
BNIP3	0	0	194	NA	7	10	10	9	1	15	7	14	6	11	16	12	5	7	10	31	11	4	2	6	0	10	NA	NA	NA	NA	6	2
BNIP3L	4	2	229	PPPP:8:11 PPP:27:29	7	9	15	9	4	21	7	17	12	8	19	14	7	7	18	36	2	4	1	12	7	11	8	0.0349345	29	0.126638	9	1
BNIPL	0	0	357	NA	25	28	5	21	4	34	12	32	11	11	44	12	7	9	22	27	19	6	9	19	0	22	NA	NA	NA	NA	20	1
BOC	3	3	1115	PPP:258:260 PPP:350:352 PPP:823:825	76	65	35	44	25	61	59	92	24	49	87	35	26	18	112	97	71	17	36	86	9	103	258	0.23139	825	0.73991	77	13
BOD1	3	1	185	PPP:168:170	20	9	8	12	1	7	14	24	3	8	13	8	3	5	17	12	8	1	1	11	3	14	168	0.908108	170	0.918919	10	2
BOD1L	6	3	3051	PPPP:9:12 PPPPPP:14:19 PPPPPP:25:30	201	130	125	192	38	385	107	204	65	109	165	285	47	26	160	354	239	2	26	191	16	144	9	0.00294985	30	0.00983284	132	6
BOK	0	0	212	NA	30	20	1	9	5	11	5	13	5	5	27	6	4	9	9	13	7	5	3	25	0	9	NA	NA	NA	NA	9	0
BOLA1	0	0	137	NA	15	10	3	1	3	11	5	16	5	3	18	3	2	2	10	12	6	1	0	11	0	10	NA	NA	NA	NA	6	2
BOLA2	0	0	152	NA	20	14	2	4	4	15	7	7	4	1	19	7	2	4	5	12	7	3	2	13	0	5	NA	NA	NA	NA	5	0
BOLA2B	0	0	152	NA	20	14	2	4	4	15	7	7	4	1	19	7	2	4	5	12	7	3	2	13	0	5	NA	NA	NA	NA	5	0
BOLA3	0	0	107	NA	11	8	1	1	1	11	6	7	4	8	8	9	5	4	5	4	7	1	1	5	0	5	NA	NA	NA	NA	5	0
BOLL	3	2	333	PPP:156:158 PPP:253:255	20	10	10	12	6	14	25	19	6	19	17	15	8	11	38	32	23	4	19	25	6	32	156	0.468468	255	0.765766	32	0
BOP1	3	1	746	PPP:316:318	46	63	13	56	12	50	30	50	23	15	77	26	12	24	66	59	28	13	18	65	3	63	316	0.423592	318	0.426273	57	3
BORA	0	0	559	NA	26	16	25	36	13	37	30	27	13	35	33	28	15	20	42	85	37	5	10	26	0	42	NA	NA	NA	NA	42	0
BPGM	3	1	259	PPP:123:125	14	18	15	11	3	27	12	15	8	16	32	16	4	5	12	15	6	7	8	15	3	9	123	0.474903	125	0.482625	9	0
BPHL	0	0	291	NA	26	18	7	20	3	12	7	26	14	11	33	21	6	14	17	12	9	5	9	21	0	17	NA	NA	NA	NA	15	1
BPI	3	1	487	PPP:267:269	32	15	24	16	4	20	21	28	14	27	49	35	18	25	34	45	23	3	14	40	3	31	267	0.548255	269	0.552361	25	3
BPIFA1	0	0	256	NA	9	5	12	12	2	6	12	33	5	19	58	8	3	4	18	12	14	0	2	22	0	18	NA	NA	NA	NA	18	0
BPIFA2	0	0	249	NA	11	1	16	15	3	11	15	12	5	21	43	19	1	4	10	20	17	2	0	23	0	10	NA	NA	NA	NA	10	0
BPIFA3	0	0	254	NA	19	9	12	9	6	18	18	14	12	21	31	13	6	9	15	19	5	5	1	12	0	15	NA	NA	NA	NA	13	1
BPIFB1	0	0	484	NA	40	9	21	20	3	20	25	23	8	36	78	30	10	16	28	42	29	5	4	37	0	28	NA	NA	NA	NA	28	0
BPIFB2	0	0	458	NA	38	19	20	14	2	15	19	29	11	19	76	13	7	19	26	39	29	2	7	54	0	26	NA	NA	NA	NA	26	0
BPIFB3	0	0	476	NA	32	11	17	13	4	23	13	42	11	19	94	21	7	15	31	36	26	3	4	54	0	31	NA	NA	NA	NA	29	1
BPIFB4	3	1	614	PPP:71:73	38	25	25	35	6	28	17	75	7	34	99	21	15	13	36	32	33	3	15	57	3	33	71	0.115635	73	0.118893	25	4
BPIFB6	0	0	453	NA	32	12	21	16	5	22	19	27	7	23	65	33	22	16	27	29	31	2	9	35	0	27	NA	NA	NA	NA	23	2
BPIFC	0	0	507	NA	26	13	33	16	5	28	18	28	9	37	66	22	12	33	29	52	28	5	16	31	0	29	NA	NA	NA	NA	25	2
BPNT1	0	0	324	NA	29	10	11	18	7	21	12	25	7	26	27	21	5	10	14	20	18	5	12	26	0	14	NA	NA	NA	NA	14	0
BPTF	8	4	3046	PPPPPPPP:24:31 PPPPPP:77:82 PPP:2809:2811 PPPPP:2813:2817	163	146	124	150	48	273	219	152	51	140	185	250	54	55	208	308	247	23	54	196	22	186	24	0.00787919	2817	0.924819	166	10
BPY2	0	0	106	NA	2	10	5	2	4	2	5	6	3	4	16	5	4	1	6	8	10	0	5	8	0	6	NA	NA	NA	NA	6	0
BPY2B	0	0	106	NA	2	10	5	2	4	2	5	6	3	4	16	5	4	1	6	8	10	0	5	8	0	6	NA	NA	NA	NA	6	0
BPY2C	0	0	106	NA	2	10	5	2	4	2	5	6	3	4	16	5	4	1	6	8	10	0	5	8	0	6	NA	NA	NA	NA	6	0
BRAF	0	0	766	NA	52	40	27	39	13	42	41	56	20	43	68	41	18	33	51	78	39	8	17	40	0	51	NA	NA	NA	NA	47	2
BRAP	0	0	592	NA	35	28	26	29	23	61	34	24	17	33	49	46	19	14	20	43	36	4	15	36	0	20	NA	NA	NA	NA	20	0
BRAT1	0	0	821	NA	94	42	3	41	30	45	53	55	20	8	135	15	8	29	59	66	44	14	5	55	0	59	NA	NA	NA	NA	53	3
BRCA1	0	0	1885	NA	84	79	123	86	44	199	98	88	52	79	156	138	31	50	97	228	111	10	31	101	0	97	NA	NA	NA	NA	93	2
BRCA2	3	1	3418	PPP:3280:3282	174	110	230	171	76	293	154	122	83	187	281	322	45	136	149	381	220	20	79	185	3	146	3280	0.959626	3282	0.960211	130	8
BRCC3	0	0	317	NA	16	18	5	12	7	32	23	13	17	20	27	14	9	8	10	32	16	4	6	28	0	10	NA	NA	NA	NA	10	0
BRD1	0	0	1189	NA	94	95	42	60	39	96	46	62	28	43	108	87	26	29	86	95	47	12	23	71	0	86	NA	NA	NA	NA	64	11
BRD2	4	2	836	PPPP:61:64 PPP:229:231	67	43	21	38	6	70	37	45	20	23	78	83	17	15	85	93	34	5	20	36	7	78	61	0.0729665	231	0.276316	56	11
BRD3	4	3	726	PPPP:21:24 PPPP:219:222 PPP:264:266	71	30	18	33	5	59	36	31	12	21	43	87	17	13	76	74	34	4	17	45	11	65	21	0.0289256	266	0.366391	49	8
BRD4	8	20	1362	PPPP:45:48 PPP:215:217 PPP:250:252 PPP:259:261 PPP:474:476 PPP:568:570 PPP:595:597 PPPPP:757:761 PPPPPPP:764:770 PPPPPPPP:776:783 PPP:797:799 PPPP:954:957 PPPP:959:962 PPPPPPP:974:980 PPP:984:986 PPP:992:994 PPPP:1011:1014 PPP:1022:1024 PPPP:1028:1031 PPP:1170:1172	95	62	35	48	8	102	147	30	45	38	82	113	35	25	236	108	61	5	18	69	80	156	45	0.0330396	1172	0.860499	108	24
BRD7	3	1	652	PPP:569:571	26	36	24	50	8	63	31	39	16	23	58	67	19	19	36	47	39	1	19	31	3	33	569	0.872699	571	0.875767	29	2
BRD8	3	1	1235	PPP:298:300	96	50	31	80	14	146	53	69	27	53	96	62	38	28	90	125	63	12	15	87	3	87	298	0.241296	300	0.242915	73	7
BRD9	3	1	597	PPP:120:122	37	30	16	50	6	56	18	33	20	10	53	61	16	19	34	57	28	1	16	36	3	31	120	0.201005	122	0.204355	29	1
BRDT	4	1	947	PPPP:14:17	43	38	59	47	11	80	64	25	17	38	72	109	30	26	55	98	50	5	22	58	4	51	14	0.0147835	17	0.0179514	39	6
BRE	0	0	415	NA	26	19	18	19	11	26	22	26	9	15	47	19	6	23	32	30	19	8	18	22	0	32	NA	NA	NA	NA	28	2
BRF1	0	0	677	NA	60	47	15	41	17	68	22	57	17	26	72	37	14	12	32	60	30	3	13	34	0	32	NA	NA	NA	NA	28	2
BRF2	0	0	419	NA	30	33	9	18	16	26	27	24	6	9	52	15	7	9	28	34	25	5	11	35	0	28	NA	NA	NA	NA	18	5
BRI3	5	1	125	PPPPP:37:41	11	8	4	3	8	3	2	12	5	8	9	2	1	8	17	2	6	0	7	9	5	12	37	0.296	41	0.328	10	1
BRI3BP	0	0	251	NA	17	17	9	6	2	13	5	20	3	3	44	8	5	16	11	25	8	5	7	27	0	11	NA	NA	NA	NA	11	0
BRIP1	0	0	1249	NA	66	54	68	66	35	98	56	61	31	77	113	102	17	45	52	120	77	15	34	62	0	52	NA	NA	NA	NA	46	3
BRIX1	0	0	353	NA	21	28	14	17	5	25	15	13	11	22	27	43	11	18	25	14	15	4	8	17	0	25	NA	NA	NA	NA	23	1
BRK1	0	0	105	NA	10	8	4	4	4	10	3	4	3	8	8	5	3	4	4	8	7	2	2	4	0	4	NA	NA	NA	NA	4	0
BRMS1	0	0	290	NA	18	26	2	17	6	41	15	12	4	9	36	17	6	3	18	28	7	9	7	9	0	18	NA	NA	NA	NA	12	3
BRMS1L	0	0	323	NA	11	19	7	28	7	41	14	12	10	17	27	30	8	3	12	29	15	4	13	16	0	12	NA	NA	NA	NA	10	1
BROX	0	0	411	NA	40	15	14	15	9	36	17	19	10	19	41	37	5	18	25	26	25	5	20	15	0	25	NA	NA	NA	NA	23	1
BRP44	0	0	127	NA	19	9	4	2	1	4	3	8	3	5	15	8	5	7	7	7	4	5	4	7	0	7	NA	NA	NA	NA	7	0
BRP44L	0	0	109	NA	14	7	4	4	3	3	3	6	3	6	9	8	6	6	4	6	5	3	4	5	0	4	NA	NA	NA	NA	4	0
BRPF1	4	1	1220	PPPP:50:53	72	92	43	71	29	106	56	68	42	40	93	88	28	29	87	110	56	13	33	64	4	83	50	0.0409836	53	0.0434426	63	10
BRPF3	4	2	1205	PPPP:785:788 PPPP:833:836	71	90	40	65	29	118	53	73	27	47	126	80	20	33	97	95	45	11	26	59	8	89	785	0.651452	836	0.693776	69	10
BRS3	0	0	399	NA	27	14	16	10	12	14	13	15	8	32	42	20	7	25	19	43	31	5	14	32	0	19	NA	NA	NA	NA	17	1
BRSK1	4	3	778	PPPP:492:495 PPP:536:538 PPP:746:748	40	61	14	34	10	51	27	72	26	27	77	44	14	23	85	85	28	4	16	40	10	75	492	0.632391	748	0.96144	61	7
BRSK2	0	0	766	NA	45	54	19	35	15	51	30	54	30	36	73	48	15	22	77	69	31	6	13	43	0	77	NA	NA	NA	NA	65	6
BRWD1	3	1	2320	PPP:588:590	124	185	109	147	48	176	89	118	63	111	172	167	47	69	112	264	124	29	53	113	3	109	588	0.253448	590	0.25431	89	10
BRWD3	3	1	1802	PPP:585:587	88	146	76	121	31	120	88	134	45	87	127	100	29	61	91	180	93	30	54	101	3	88	585	0.324639	587	0.325749	78	5
BSCL2	0	0	464	NA	35	29	10	18	7	38	22	37	10	15	50	11	9	17	34	45	23	7	18	29	0	34	NA	NA	NA	NA	30	2
BSDC1	0	0	474	NA	38	15	7	23	11	57	21	34	6	16	35	26	8	13	43	53	28	7	7	26	0	43	NA	NA	NA	NA	35	4
BSG	0	0	385	NA	31	19	13	24	7	26	17	31	13	15	34	17	5	11	18	33	22	10	6	33	0	18	NA	NA	NA	NA	14	2
BSN	3	4	3926	PPP:532:534 PPP:622:624 PPP:2900:2902 PPP:3389:3391	388	262	48	145	37	275	274	365	92	67	285	155	61	59	498	426	236	12	95	146	12	486	532	0.135507	3391	0.863729	418	34
BSND	0	0	320	NA	23	11	4	25	6	31	20	31	5	11	28	11	12	12	30	24	10	6	9	11	0	30	NA	NA	NA	NA	28	1
BSPH1	0	0	132	NA	5	5	7	6	9	10	0	6	3	6	8	11	2	11	4	9	10	6	8	6	0	4	NA	NA	NA	NA	4	0
BSPRY	0	0	402	NA	35	30	10	16	12	34	25	33	14	13	45	12	5	15	20	31	17	6	4	25	0	20	NA	NA	NA	NA	20	0
BST1	0	0	333	NA	27	23	14	19	11	17	15	18	8	16	42	16	6	12	17	29	12	6	10	15	0	17	NA	NA	NA	NA	15	1
BST2	0	0	216	NA	20	13	6	10	6	18	14	17	4	11	25	13	7	3	5	13	14	0	4	13	0	5	NA	NA	NA	NA	5	0
BSX	0	0	233	NA	18	15	3	10	1	18	8	13	15	4	27	12	4	10	28	20	13	1	4	9	0	28	NA	NA	NA	NA	28	0
BTAF1	0	0	1849	NA	133	88	76	102	40	118	109	87	51	95	236	106	50	52	85	123	105	21	34	138	0	85	NA	NA	NA	NA	75	5
BTBD1	5	1	482	PPPPP:25:29	48	27	16	21	11	32	19	37	7	26	45	20	8	30	32	30	31	3	12	27	5	27	25	0.0518672	29	0.060166	27	0
BTBD10	0	0	483	NA	27	39	16	29	10	38	15	29	13	28	29	26	12	18	27	56	24	2	18	27	0	27	NA	NA	NA	NA	23	2
BTBD11	3	1	1104	PPP:779:781	110	60	36	48	31	72	41	77	45	42	130	46	27	31	63	92	47	11	30	65	3	60	779	0.705616	781	0.707428	52	4
BTBD16	0	0	507	NA	27	24	19	18	10	32	26	22	18	29	69	43	10	34	19	32	32	6	14	23	0	19	NA	NA	NA	NA	19	0
BTBD17	3	1	478	PPP:243:245	67	37	11	19	3	21	27	35	19	8	65	7	4	17	28	31	17	11	15	36	3	25	243	0.508368	245	0.512552	23	1
BTBD18	0	0	712	NA	36	40	19	31	18	75	32	43	13	20	78	32	8	11	74	81	44	9	8	40	0	74	NA	NA	NA	NA	68	3
BTBD19	0	0	291	NA	34	27	5	7	10	30	11	14	7	3	45	7	1	13	16	13	8	2	4	34	0	16	NA	NA	NA	NA	16	0
BTBD2	0	0	525	NA	69	28	23	22	12	32	19	47	8	20	40	18	7	29	34	27	37	3	11	39	0	34	NA	NA	NA	NA	28	3
BTBD3	0	0	522	NA	45	22	26	25	15	32	27	28	6	25	48	36	11	27	22	42	25	6	20	34	0	22	NA	NA	NA	NA	18	2
BTBD6	4	1	485	PPPP:42:45	59	28	18	17	11	36	20	29	8	18	45	19	9	23	31	32	26	6	17	33	4	27	42	0.0865979	45	0.0927835	21	3
BTBD7	6	2	1132	PPPPPP:759:764 PPP:812:814	89	76	36	60	20	76	52	55	37	44	112	51	29	37	87	109	62	6	36	58	9	78	759	0.670495	814	0.719081	60	9
BTBD8	0	0	378	NA	23	20	15	21	13	28	15	19	9	30	39	21	10	19	14	33	14	3	11	21	0	14	NA	NA	NA	NA	12	1
BTBD9	0	0	612	NA	38	34	26	36	17	41	26	31	20	37	63	23	17	23	23	57	32	8	22	38	0	23	NA	NA	NA	NA	23	0
BTC	0	0	178	NA	12	15	5	8	14	13	4	13	4	13	17	11	3	4	7	8	10	0	4	13	0	7	NA	NA	NA	NA	7	0
BTD	0	0	545	NA	38	23	24	27	16	32	17	39	22	25	56	18	14	34	30	29	30	7	24	40	0	30	NA	NA	NA	NA	28	1
BTF3	3	1	206	PPP:32:34	21	14	12	11	1	14	13	20	3	7	17	16	5	5	11	10	16	0	0	10	3	8	32	0.15534	34	0.165049	8	0
BTF3L4	0	0	158	NA	17	6	10	13	0	12	8	8	3	9	14	17	3	4	7	9	8	0	0	10	0	7	NA	NA	NA	NA	7	0
BTG1	0	0	171	NA	10	10	5	4	4	12	9	12	5	10	17	8	6	6	8	19	10	2	7	7	0	8	NA	NA	NA	NA	8	0
BTG2	0	0	158	NA	10	8	3	4	5	10	7	12	6	8	19	8	4	3	9	19	5	2	6	10	0	9	NA	NA	NA	NA	9	0
BTG3	3	2	296	PPP:250:252 PPP:276:278	15	19	14	15	9	19	7	11	10	12	20	25	7	10	35	20	9	7	12	20	6	29	250	0.844595	278	0.939189	23	3
BTG4	0	0	223	NA	8	15	10	11	8	16	11	9	8	12	14	18	4	10	12	20	9	5	7	16	0	12	NA	NA	NA	NA	12	0
BTK	3	1	659	PPP:73:75	29	34	23	27	12	58	32	36	15	34	57	53	20	24	37	54	26	11	37	40	3	34	73	0.110774	75	0.113809	28	3
BTLA	0	0	289	NA	13	15	17	12	13	22	10	14	8	14	33	15	4	11	16	26	16	5	10	15	0	16	NA	NA	NA	NA	16	0
BTN1A1	0	0	526	NA	33	36	14	29	10	43	14	35	9	25	54	23	8	21	42	41	27	12	13	37	0	42	NA	NA	NA	NA	38	2
BTN2A1	0	0	529	NA	27	39	13	25	12	48	16	30	15	25	49	24	10	23	36	48	25	10	13	41	0	36	NA	NA	NA	NA	30	3
BTN2A2	0	0	523	NA	35	36	14	19	12	45	17	31	10	28	53	19	14	24	30	39	21	11	14	51	0	30	NA	NA	NA	NA	30	0
BTN3A1	0	0	513	NA	38	29	15	24	9	34	21	37	11	21	56	32	11	20	26	38	25	13	17	36	0	26	NA	NA	NA	NA	24	1
BTN3A2	0	0	334	NA	33	15	8	12	5	28	14	26	5	18	40	16	8	9	13	34	13	5	11	21	0	13	NA	NA	NA	NA	13	0
BTN3A3	0	0	584	NA	50	31	16	26	9	51	18	40	13	27	62	29	12	18	38	45	31	12	21	35	0	38	NA	NA	NA	NA	36	1
BTNL2	0	0	482	NA	29	24	11	24	9	37	23	38	14	21	50	17	13	14	26	41	23	11	13	44	0	26	NA	NA	NA	NA	26	0
BTNL3	0	0	466	NA	26	22	12	22	10	29	23	39	13	24	44	20	6	25	23	37	23	12	16	40	0	23	NA	NA	NA	NA	19	2
BTNL8	0	0	500	NA	26	33	12	24	11	30	28	34	14	25	45	25	8	26	26	45	27	11	15	35	0	26	NA	NA	NA	NA	24	1
BTNL9	0	0	536	NA	47	35	9	25	8	35	28	39	16	11	64	18	4	23	42	44	16	16	12	44	0	42	NA	NA	NA	NA	34	4
BTRC	0	0	605	NA	37	46	27	37	25	35	20	31	16	35	58	32	14	15	22	50	34	14	19	38	0	22	NA	NA	NA	NA	14	4
BUB1	0	0	1085	NA	75	37	54	47	20	86	66	55	35	42	102	77	34	48	66	85	49	13	30	64	0	66	NA	NA	NA	NA	58	4
BUB1B	0	0	1064	NA	68	55	47	46	23	109	69	44	19	59	105	67	18	42	58	87	54	17	27	50	0	58	NA	NA	NA	NA	52	3
BUB3	0	0	328	NA	17	17	18	21	8	16	15	19	10	14	22	17	7	14	19	27	23	6	14	24	0	19	NA	NA	NA	NA	17	1
BUD13	3	1	619	PPP:571:573	41	76	17	59	1	39	27	33	21	9	32	51	10	12	62	71	21	7	12	18	3	59	571	0.922456	573	0.925687	39	10
BUD31	0	0	144	NA	5	13	4	6	10	14	4	9	4	11	10	16	2	4	7	5	7	3	6	4	0	7	NA	NA	NA	NA	5	1
BVES	0	0	360	NA	15	20	13	18	9	22	10	15	14	24	44	22	12	18	18	31	22	4	13	16	0	18	NA	NA	NA	NA	16	1
BYSL	0	0	437	NA	44	37	8	18	4	43	19	23	9	20	49	26	13	13	28	17	21	5	12	28	0	28	NA	NA	NA	NA	26	1
BZRAP1	4	3	1907	PPPP:548:551 PPP:813:815 PPP:1732:1734	167	147	39	75	42	205	105	182	26	40	189	63	18	32	206	175	72	18	23	83	10	196	548	0.287362	1734	0.909282	158	19
BZW1	3	1	451	PPP:23:25	39	18	19	19	3	44	25	23	4	18	47	43	14	24	14	26	21	5	14	31	3	11	23	0.0509978	25	0.0554324	11	0
BZW2	0	0	419	NA	33	18	16	23	4	41	20	18	7	14	53	43	10	23	8	23	21	5	12	27	0	8	NA	NA	NA	NA	8	0
C10orf10	3	1	212	PPP:31:33	16	24	0	11	2	8	16	15	7	4	22	4	7	3	27	23	11	3	2	7	3	24	31	0.146226	33	0.15566	20	2
C10orf102	0	0	129	NA	14	14	1	5	3	6	2	11	2	2	12	7	1	3	11	8	10	3	3	10	0	11	NA	NA	NA	NA	7	2
C10orf103	0	0	148	NA	18	11	7	2	3	7	10	16	1	3	9	6	5	2	15	16	10	2	3	2	0	15	NA	NA	NA	NA	15	0
C10orf105	0	0	167	NA	16	14	1	4	5	9	4	11	7	4	25	3	6	4	22	15	10	1	1	5	0	22	NA	NA	NA	NA	20	1
C10orf107	0	0	208	NA	9	3	6	14	1	24	13	8	3	22	18	14	8	11	9	15	12	2	6	10	0	9	NA	NA	NA	NA	7	1
C10orf108	0	0	221	NA	14	17	5	5	4	3	14	16	14	5	20	5	2	3	34	26	16	8	2	8	0	34	NA	NA	NA	NA	24	5
C10orf11	0	0	226	NA	11	18	11	14	5	19	7	14	6	5	37	12	2	7	10	15	8	0	9	16	0	10	NA	NA	NA	NA	10	0
C10orf111	0	0	155	NA	9	12	9	3	2	8	8	7	3	3	25	8	5	7	12	13	5	3	4	9	0	12	NA	NA	NA	NA	10	1
C10orf112	0	0	1486	NA	79	70	69	103	73	75	57	108	47	75	128	66	23	70	78	142	89	33	34	67	0	78	NA	NA	NA	NA	68	5
C10orf113	0	0	155	NA	11	14	4	3	3	12	4	10	1	8	13	14	7	7	14	13	4	3	4	6	0	14	NA	NA	NA	NA	10	2
C10orf114	0	0	136	NA	16	24	0	8	6	5	5	15	2	2	7	0	1	4	16	10	8	3	1	3	0	16	NA	NA	NA	NA	16	0
C10orf116	0	0	76	NA	14	0	1	5	0	4	11	7	0	2	5	8	2	2	0	4	7	0	0	4	0	0	NA	NA	NA	NA	0	0
C10orf118	0	0	1004	NA	45	55	51	46	15	131	68	30	23	52	110	115	17	16	16	95	59	8	13	39	0	16	NA	NA	NA	NA	16	0
C10orf12	0	0	1247	NA	82	68	55	65	24	119	54	66	27	39	86	127	20	20	106	148	68	9	11	53	0	106	NA	NA	NA	NA	90	8
C10orf120	0	0	335	NA	21	29	16	16	9	29	14	11	8	18	27	35	11	12	18	24	12	4	11	10	0	18	NA	NA	NA	NA	18	0
C10orf122	0	0	186	NA	6	14	10	8	4	10	7	8	5	6	11	18	2	11	15	20	8	3	7	13	0	15	NA	NA	NA	NA	11	2
C10orf125	0	0	154	NA	19	9	3	5	3	13	3	11	1	7	26	7	4	4	10	6	5	1	5	12	0	10	NA	NA	NA	NA	10	0
C10orf126	0	0	172	NA	14	6	4	6	6	11	13	12	4	5	21	6	2	13	13	13	6	7	4	6	0	13	NA	NA	NA	NA	13	0
C10orf128	0	0	172	NA	16	8	1	8	3	2	8	14	7	10	27	14	5	11	8	12	6	0	3	9	0	8	NA	NA	NA	NA	8	0
C10orf129	0	0	506	NA	34	23	13	25	20	20	27	36	7	24	54	31	15	23	33	38	27	12	18	26	0	33	NA	NA	NA	NA	23	5
C10orf131	0	0	256	NA	9	12	14	12	3	32	13	9	2	18	25	30	7	9	12	23	8	2	5	11	0	12	NA	NA	NA	NA	12	0
C10orf137	0	0	1238	NA	97	46	58	62	24	94	63	61	31	59	140	90	32	38	46	135	49	14	44	55	0	46	NA	NA	NA	NA	40	3
C10orf140	3	2	908	PPP:117:119 PPP:334:336	125	49	34	35	23	63	27	48	43	24	66	61	4	32	75	95	45	7	20	32	6	69	117	0.128855	336	0.370044	55	7
C10orf2	0	0	684	NA	41	56	20	40	9	39	31	52	13	28	82	35	10	35	42	47	43	12	14	35	0	42	NA	NA	NA	NA	36	3
C10orf25	0	0	122	NA	6	13	5	2	6	3	4	2	2	3	13	6	1	7	16	13	3	6	5	6	0	16	NA	NA	NA	NA	10	3
C10orf26	4	1	363	PPPP:139:142	24	23	12	24	18	25	21	25	13	12	36	8	3	9	42	33	11	4	10	10	4	38	139	0.38292	142	0.391185	22	8
C10orf27	0	0	351	NA	20	21	3	11	5	31	28	16	11	13	39	30	4	10	35	32	18	2	5	17	0	35	NA	NA	NA	NA	29	3
C10orf28	0	0	778	NA	48	44	24	57	17	78	29	41	19	39	50	50	16	28	36	85	56	3	10	48	0	36	NA	NA	NA	NA	34	1
C10orf31	0	0	184	NA	18	17	4	7	10	5	7	15	6	5	17	3	6	13	11	15	6	5	2	12	0	11	NA	NA	NA	NA	9	1
C10orf32	0	0	106	NA	8	4	3	5	1	7	12	6	3	5	14	7	4	1	1	9	9	0	1	6	0	1	NA	NA	NA	NA	1	0
C10orf35	0	0	121	NA	7	11	6	4	0	2	10	14	4	4	17	0	4	5	11	6	4	1	1	10	0	11	NA	NA	NA	NA	7	2
C10orf40	0	0	128	NA	1	9	4	4	5	8	9	9	2	9	11	9	6	5	6	4	10	5	6	6	0	6	NA	NA	NA	NA	6	0
C10orf46	6	2	369	PPPPPP:37:42 PPP:80:82	32	13	15	17	5	27	21	18	5	23	31	20	14	11	34	31	16	3	17	16	9	25	37	0.100271	82	0.222222	19	3
C10orf47	4	2	435	PPPP:147:150 PPP:161:163	50	43	6	19	6	35	13	41	8	7	34	10	4	13	62	48	18	2	1	15	7	55	147	0.337931	163	0.374713	49	3
C10orf53	0	0	157	NA	6	6	5	7	5	9	10	10	7	9	19	8	4	6	9	11	10	2	3	11	0	9	NA	NA	NA	NA	9	0
C10orf54	0	0	311	NA	26	18	11	12	8	16	15	23	16	11	34	6	4	10	24	29	15	3	8	22	0	24	NA	NA	NA	NA	20	2
C10orf55	0	0	151	NA	6	7	1	6	4	6	6	18	5	5	15	5	5	6	23	13	8	2	1	9	0	23	NA	NA	NA	NA	19	2
C10orf58	0	0	229	NA	19	10	6	9	2	19	7	22	2	9	28	22	9	18	8	11	6	4	5	13	0	8	NA	NA	NA	NA	8	0
C10orf62	0	0	223	NA	18	14	9	6	2	23	12	11	21	8	13	14	3	5	6	29	17	3	2	7	0	6	NA	NA	NA	NA	6	0
C10orf67	0	0	296	NA	9	11	12	18	0	42	21	8	6	19	36	36	10	14	2	26	9	0	6	11	0	2	NA	NA	NA	NA	2	0
C10orf68	0	0	692	NA	26	33	27	35	0	64	42	32	26	48	58	77	11	17	35	60	57	0	12	32	0	35	NA	NA	NA	NA	35	0
C10orf71	4	4	1435	PPP:117:119 PPP:1015:1017 PPP:1239:1241 PPPP:1322:1325	104	84	49	69	24	120	74	96	34	26	105	84	17	43	165	163	81	15	21	61	13	152	117	0.0815331	1325	0.923345	126	13
C10orf76	0	0	689	NA	42	28	38	30	15	50	25	20	24	43	94	41	27	27	23	51	35	4	24	48	0	23	NA	NA	NA	NA	19	2
C10orf81	0	0	465	NA	17	21	15	31	12	40	27	27	14	23	37	27	9	23	21	58	25	6	11	21	0	21	NA	NA	NA	NA	15	3
C10orf82	0	0	230	NA	13	9	5	6	11	18	10	12	5	7	22	22	6	7	25	15	14	1	12	10	0	25	NA	NA	NA	NA	23	1
C10orf85	0	0	128	NA	11	4	2	4	5	4	7	15	3	4	10	5	1	2	12	19	7	6	0	7	0	12	NA	NA	NA	NA	12	0
C10orf88	0	0	445	NA	15	19	28	22	12	33	20	35	13	24	55	27	14	10	21	44	23	2	9	19	0	21	NA	NA	NA	NA	17	2
C10orf90	0	0	796	NA	54	62	25	36	22	53	46	38	31	31	68	54	11	24	60	82	40	7	10	42	0	60	NA	NA	NA	NA	50	5
C10orf91	0	0	145	NA	18	10	1	5	1	6	13	12	4	2	9	1	2	5	16	20	8	4	1	7	0	16	NA	NA	NA	NA	14	1
C10orf93	3	1	2715	PPP:2651:2653	276	162	68	101	61	237	147	142	78	89	359	171	64	72	127	195	105	42	56	163	3	124	2651	0.976427	2653	0.977164	110	7
C10orf95	3	1	257	PPP:136:138	48	43	4	2	20	4	2	28	2	0	5	6	3	0	39	29	16	4	2	0	3	36	136	0.529183	138	0.536965	32	2
C10orf96	0	0	258	NA	9	10	12	10	3	48	18	0	5	18	31	32	9	12	1	17	13	0	5	5	0	1	NA	NA	NA	NA	1	0
C10orf99	0	0	81	NA	3	9	2	0	6	3	1	4	3	2	14	5	1	2	8	7	3	2	0	6	0	8	NA	NA	NA	NA	8	0
C11orf1	0	0	190	NA	3	8	15	7	5	9	7	11	7	3	15	14	6	8	13	23	14	6	11	5	0	13	NA	NA	NA	NA	11	1
C11orf10	0	0	79	NA	5	2	1	1	0	4	0	4	1	4	12	2	4	8	3	5	6	2	5	10	0	3	NA	NA	NA	NA	3	0
C11orf16	0	0	467	NA	39	27	10	13	19	33	24	34	14	9	50	25	9	8	50	30	24	15	8	26	0	50	NA	NA	NA	NA	38	6
C11orf2	0	0	782	NA	87	63	13	38	16	60	42	56	16	22	98	26	14	32	39	49	35	2	19	55	0	39	NA	NA	NA	NA	35	2
C11orf20	0	0	200	NA	10	14	6	9	1	25	8	12	8	7	24	14	7	2	7	24	9	3	5	5	0	7	NA	NA	NA	NA	7	0
C11orf21	0	0	178	NA	20	10	1	7	6	7	5	24	8	2	24	2	3	2	24	15	4	8	0	6	0	24	NA	NA	NA	NA	18	3
C11orf24	0	0	449	NA	58	11	11	14	1	16	17	17	5	9	26	14	18	4	48	58	77	3	7	35	0	48	NA	NA	NA	NA	46	1
C11orf30	0	0	1337	NA	90	39	30	27	7	68	130	52	23	79	85	81	31	12	120	174	151	3	17	118	0	120	NA	NA	NA	NA	104	8
C11orf31	0	0	122	NA	14	11	3	1	1	15	2	9	1	2	11	12	2	2	10	6	5	1	2	11	0	10	NA	NA	NA	NA	8	1
C11orf34	0	0	207	NA	18	5	7	8	3	11	10	3	2	14	25	9	6	13	9	22	16	2	11	13	0	9	NA	NA	NA	NA	9	0
C11orf35	0	0	634	NA	43	64	11	25	14	50	33	39	19	13	70	23	6	13	71	60	32	10	3	35	0	71	NA	NA	NA	NA	55	8
C11orf36	3	1	158	PPP:56:58	14	10	1	4	5	8	8	16	8	4	17	1	2	2	15	26	9	2	1	5	3	12	56	0.35443	58	0.367089	10	1
C11orf39	0	0	140	NA	9	10	2	3	4	5	6	16	5	2	13	4	4	8	18	14	8	3	2	4	0	18	NA	NA	NA	NA	10	4
C11orf40	0	0	217	NA	13	11	8	14	8	9	8	7	8	11	30	13	8	6	13	18	9	4	5	14	0	13	NA	NA	NA	NA	13	0
C11orf41	4	2	1855	PPPP:59:62 PPPP:1644:1647	179	81	71	65	4	92	103	97	45	65	157	80	43	46	164	223	159	14	46	121	8	156	59	0.0318059	1647	0.887871	134	11
C11orf42	3	3	333	PPP:252:254 PPP:261:263 PPP:300:302	25	21	7	16	5	15	16	25	7	7	45	13	5	11	44	26	17	6	6	16	9	35	252	0.756757	302	0.906907	29	3
C11orf44	0	0	122	NA	10	9	0	4	6	7	9	5	2	2	17	0	4	4	8	14	10	5	1	5	0	8	NA	NA	NA	NA	8	0
C11orf45	0	0	145	NA	12	10	6	3	5	7	8	11	6	5	10	1	2	1	9	22	12	4	2	9	0	9	NA	NA	NA	NA	7	1
C11orf46	0	0	260	NA	13	16	10	19	16	14	12	19	8	13	24	22	5	10	9	14	19	2	6	9	0	9	NA	NA	NA	NA	9	0
C11orf48	0	0	289	NA	25	13	7	18	9	31	17	22	11	5	19	6	1	8	30	29	11	9	3	15	0	30	NA	NA	NA	NA	22	4
C11orf49	3	1	337	PPP:218:220	24	21	10	19	10	24	15	18	10	8	44	9	9	21	21	26	16	2	12	18	3	18	218	0.646884	220	0.652819	16	1
C11orf51	3	1	190	PPP:149:151	6	3	7	18	6	23	13	4	7	4	16	7	8	10	16	18	9	4	4	7	3	13	149	0.784211	151	0.794737	13	0
C11orf52	0	0	123	NA	5	9	5	3	4	7	13	9	6	1	9	8	2	2	8	10	11	1	4	6	0	8	NA	NA	NA	NA	8	0
C11orf53	3	2	236	PPP:91:93 PPP:179:181	16	7	4	15	3	10	8	18	8	2	23	4	2	11	36	35	11	4	11	8	6	30	91	0.385593	181	0.766949	22	4
C11orf54	0	0	315	NA	18	9	11	14	9	24	9	28	13	14	27	24	7	22	23	15	13	1	11	23	0	23	NA	NA	NA	NA	21	1
C11orf55	0	0	121	NA	4	10	1	6	5	8	2	12	9	6	10	5	3	6	10	4	5	4	2	9	0	10	NA	NA	NA	NA	8	1
C11orf57	0	0	293	NA	14	22	11	20	0	31	10	10	10	8	11	50	6	6	8	41	18	5	7	5	0	8	NA	NA	NA	NA	8	0
C11orf58	0	0	183	NA	11	9	5	25	1	24	5	15	8	2	9	16	5	4	7	24	3	1	3	6	0	7	NA	NA	NA	NA	7	0
C11orf61	0	0	559	NA	42	29	18	18	11	46	28	55	9	32	50	28	10	16	34	54	21	10	21	27	0	34	NA	NA	NA	NA	34	0
C11orf63	0	0	778	NA	33	39	43	33	3	67	63	31	29	24	71	80	13	13	46	99	37	7	19	28	0	46	NA	NA	NA	NA	38	4
C11orf65	0	0	313	NA	18	18	18	19	1	25	13	17	12	19	21	26	7	15	12	20	16	9	14	13	0	12	NA	NA	NA	NA	10	1
C11orf67	0	0	168	NA	12	6	3	4	6	10	8	17	8	4	12	10	3	1	8	17	14	4	3	18	0	8	NA	NA	NA	NA	8	0
C11orf68	0	0	293	NA	40	24	5	14	3	21	11	35	6	8	24	7	5	5	17	16	15	8	10	19	0	17	NA	NA	NA	NA	15	1
C11orf70	0	0	267	NA	9	13	5	19	8	14	13	14	7	17	27	18	6	20	10	25	11	2	13	16	0	10	NA	NA	NA	NA	10	0
C11orf71	0	0	147	NA	12	20	3	7	2	6	5	11	3	6	15	1	2	3	11	20	5	2	2	11	0	11	NA	NA	NA	NA	11	0
C11orf72	3	1	251	PPP:231:233	11	13	7	3	10	5	14	14	9	6	42	9	4	8	39	27	10	4	10	6	3	36	231	0.920319	233	0.928287	26	5
C11orf73	0	0	197	NA	15	4	10	7	1	7	14	15	2	8	13	7	9	17	13	19	9	3	5	19	0	13	NA	NA	NA	NA	13	0
C11orf74	0	0	221	NA	5	5	8	24	6	26	12	5	6	10	22	17	7	11	10	19	13	0	3	12	0	10	NA	NA	NA	NA	8	1
C11orf75	0	0	59	NA	4	4	0	1	0	4	5	1	0	3	5	8	2	1	3	1	7	0	1	9	0	3	NA	NA	NA	NA	3	0
C11orf80	0	0	677	NA	59	36	17	26	14	42	33	41	28	33	79	27	17	25	36	64	38	12	7	43	0	36	NA	NA	NA	NA	36	0
C11orf82	0	0	998	NA	47	35	54	62	34	52	52	41	33	50	87	75	9	50	55	132	56	9	23	42	0	55	NA	NA	NA	NA	47	4
C11orf83	0	0	93	NA	11	8	2	2	0	8	6	11	0	2	11	4	6	0	4	4	5	2	1	6	0	4	NA	NA	NA	NA	4	0
C11orf84	3	2	381	PPP:50:52 PPP:313:315	32	26	7	24	5	38	15	29	7	6	30	17	7	7	53	32	17	5	0	24	6	47	50	0.131234	315	0.826772	39	4
C11orf85	0	0	216	NA	6	13	7	7	3	17	4	13	9	12	21	19	5	12	20	18	8	3	6	13	0	20	NA	NA	NA	NA	18	1
C11orf86	0	0	115	NA	6	18	0	2	0	9	14	12	0	2	11	2	1	2	9	12	5	4	2	4	0	9	NA	NA	NA	NA	9	0
C11orf87	6	1	197	PPPPPP:164:169	18	15	4	3	8	7	11	19	5	5	21	6	3	6	21	25	11	0	1	8	6	15	164	0.832487	169	0.857868	13	1
C11orf88	0	0	196	NA	11	15	5	7	1	23	16	6	6	7	17	18	3	4	11	27	5	2	3	9	0	11	NA	NA	NA	NA	7	2
C11orf89	4	3	479	PPPP:23:26 PPP:250:252 PPP:452:454	56	37	6	5	4	33	21	28	15	9	37	13	10	8	92	39	29	5	2	30	10	82	23	0.0480167	454	0.947808	66	8
C11orf9	9	3	1151	PPP:91:93 PPPPP:178:182 PPPPPPPPP:188:196	78	47	42	42	19	56	60	83	47	37	108	48	23	33	132	121	68	10	26	71	17	115	91	0.0790617	196	0.170287	91	12
C11orf91	7	2	193	PPPPPPP:74:80 PPP:112:114	15	9	1	5	2	10	5	16	2	6	22	12	2	7	34	26	6	3	5	5	10	24	74	0.38342	114	0.590674	22	1
C11orf92	0	0	124	NA	10	5	1	9	6	7	4	12	1	2	14	4	4	7	6	14	4	4	1	9	0	6	NA	NA	NA	NA	6	0
C11orf93	0	0	154	NA	15	2	6	10	9	7	7	3	6	4	10	1	1	8	15	27	9	0	12	2	0	15	NA	NA	NA	NA	13	1
C11orf94	0	0	98	NA	10	10	0	5	0	3	5	6	4	2	20	2	2	2	11	8	0	0	4	4	0	11	NA	NA	NA	NA	11	0
C11orf96	3	2	435	PPP:277:279 PPP:303:305	51	50	6	19	12	25	18	52	5	8	30	18	5	10	47	40	13	5	4	17	6	41	277	0.636782	305	0.701149	31	5
C12orf10	4	2	376	PPPP:15:18 PPP:32:34	29	28	5	19	6	27	18	26	17	12	44	11	8	14	30	25	19	7	12	19	7	23	15	0.0398936	34	0.0904255	19	2
C12orf11	0	0	706	NA	34	44	36	34	17	69	25	33	28	39	64	48	19	16	34	62	37	7	15	45	0	34	NA	NA	NA	NA	26	4
C12orf12	4	1	406	PPPP:94:97	19	26	15	12	14	68	21	33	9	6	24	16	6	15	43	26	11	13	10	19	4	39	94	0.231527	97	0.238916	27	6
C12orf23	0	0	116	NA	8	1	4	5	0	4	6	18	1	5	5	11	4	1	7	9	10	1	1	15	0	7	NA	NA	NA	NA	5	1
C12orf24	0	0	273	NA	16	16	8	9	4	18	17	21	13	10	23	21	13	5	12	33	14	4	10	6	0	12	NA	NA	NA	NA	10	1
C12orf26	0	0	603	NA	41	27	31	24	20	52	25	25	13	31	68	47	15	20	26	52	28	6	20	32	0	26	NA	NA	NA	NA	24	1
C12orf28	0	0	695	NA	53	32	33	33	20	41	41	38	20	32	54	39	19	28	46	66	36	9	12	43	0	46	NA	NA	NA	NA	38	4
C12orf29	0	0	325	NA	12	10	21	19	11	24	9	15	16	21	29	30	4	15	23	17	11	8	8	22	0	23	NA	NA	NA	NA	23	0
C12orf32	0	0	238	NA	8	16	4	8	4	13	17	8	9	9	22	16	2	7	29	32	16	2	4	12	0	29	NA	NA	NA	NA	25	2
C12orf34	6	2	452	PPP:168:170 PPPPPP:292:297	64	17	11	9	11	14	21	35	11	12	45	19	5	4	63	45	20	2	19	25	9	54	168	0.371681	297	0.65708	44	5
C12orf35	5	2	1747	PPP:213:215 PPPPP:277:281	71	52	119	79	32	111	141	57	37	71	128	171	40	36	111	214	124	8	34	111	8	103	213	0.121923	281	0.160847	93	5
C12orf36	0	0	138	NA	8	16	4	8	7	9	8	7	2	6	16	7	1	6	8	9	7	3	2	4	0	8	NA	NA	NA	NA	6	1
C12orf39	0	0	116	NA	9	12	5	6	1	7	7	4	0	3	20	5	2	6	8	10	6	2	1	2	0	8	NA	NA	NA	NA	8	0
C12orf4	0	0	552	NA	28	33	25	28	12	53	30	20	23	27	65	34	14	22	15	46	25	6	13	33	0	15	NA	NA	NA	NA	15	0
C12orf40	0	0	652	NA	13	31	55	42	21	44	36	20	14	35	47	60	17	21	26	83	37	3	17	30	0	26	NA	NA	NA	NA	26	0
C12orf42	0	0	360	NA	32	29	13	7	10	22	14	16	16	13	26	16	8	14	38	41	21	3	4	17	0	38	NA	NA	NA	NA	36	1
C12orf43	0	0	263	NA	31	14	5	9	3	20	16	14	5	9	17	30	3	7	18	27	14	3	2	16	0	18	NA	NA	NA	NA	16	1
C12orf44	0	0	218	NA	8	14	5	13	5	20	9	13	5	10	19	15	6	8	5	13	16	3	7	24	0	5	NA	NA	NA	NA	5	0
C12orf45	0	0	185	NA	9	9	8	14	1	17	8	11	2	10	12	16	5	3	13	29	7	1	0	10	0	13	NA	NA	NA	NA	11	1
C12orf48	3	1	656	PPP:317:319	39	34	47	40	11	34	27	31	12	39	76	57	13	18	30	59	34	5	16	34	3	27	317	0.483232	319	0.48628	21	3
C12orf49	0	0	205	NA	12	14	15	7	15	11	12	8	5	4	24	9	3	9	10	14	5	4	8	16	0	10	NA	NA	NA	NA	8	1
C12orf5	0	0	270	NA	18	15	10	11	7	21	11	19	6	11	27	18	10	17	10	22	17	0	4	16	0	10	NA	NA	NA	NA	8	1
C12orf50	0	0	414	NA	16	22	28	15	8	38	21	16	13	22	23	38	8	10	35	41	25	4	14	17	0	35	NA	NA	NA	NA	31	2
C12orf51	5	6	4272	PPP:394:396 PPPPP:2201:2205 PPPP:2357:2360 PPP:2504:2506 PPP:2930:2932 PPP:2955:2957	321	209	146	202	108	289	185	261	97	203	516	206	89	125	262	383	260	39	93	278	21	241	394	0.0922285	2957	0.692182	213	14
C12orf52	3	1	293	PPP:168:170	24	28	4	7	3	10	6	30	10	3	23	18	5	5	38	34	27	3	4	11	3	35	168	0.573379	170	0.580205	29	3
C12orf53	3	2	282	PPP:26:28 PPP:65:67	22	23	5	11	3	11	11	30	6	10	27	3	4	9	49	23	13	6	3	13	6	43	26	0.0921986	67	0.237589	35	4
C12orf54	0	0	127	NA	4	9	2	5	2	9	15	6	2	6	8	7	7	3	10	13	12	1	2	4	0	10	NA	NA	NA	NA	8	1
C12orf55;C12orf63	4	1	3096	PPPP:907:910	192	131	135	136	75	210	136	110	58	207	399	240	72	134	129	259	162	31	106	174	4	125	907	0.292959	910	0.293928	109	8
C12orf56	0	0	625	NA	32	36	29	21	11	40	29	16	14	40	81	44	6	32	38	70	26	4	21	35	0	38	NA	NA	NA	NA	32	3
C12orf57	0	0	126	NA	22	3	3	5	2	8	8	8	1	4	11	7	5	5	9	10	3	0	2	10	0	9	NA	NA	NA	NA	5	2
C12orf59	3	1	183	PPP:81:83	12	8	4	7	10	11	7	12	7	7	25	3	3	5	13	16	12	4	3	14	3	10	81	0.442623	83	0.453552	6	2
C12orf60	0	0	245	NA	14	5	10	13	2	18	13	3	5	16	23	27	14	11	6	31	16	0	2	16	0	6	NA	NA	NA	NA	4	1
C12orf61	0	0	131	NA	24	13	1	1	2	6	6	12	5	2	9	4	1	0	22	11	4	1	1	6	0	22	NA	NA	NA	NA	20	1
C12orf62	0	0	57	NA	4	4	0	1	1	2	5	5	1	2	4	3	4	2	1	4	5	1	5	3	0	1	NA	NA	NA	NA	1	0
C12orf65	0	0	166	NA	9	8	6	4	3	14	7	10	6	5	18	24	2	4	10	9	9	3	2	13	0	10	NA	NA	NA	NA	10	0
C12orf66	0	0	468	NA	35	16	15	16	5	29	21	22	22	17	54	38	11	32	20	45	20	5	17	28	0	20	NA	NA	NA	NA	18	1
C12orf68	0	0	194	NA	13	6	2	15	4	24	10	23	3	7	20	5	10	2	17	14	7	0	1	11	0	17	NA	NA	NA	NA	17	0
C12orf69	0	0	225	NA	19	7	9	11	3	17	12	11	5	21	26	23	6	3	3	13	12	0	4	20	0	3	NA	NA	NA	NA	3	0
C12orf70	0	0	343	NA	14	12	18	28	6	34	18	13	4	16	51	30	14	13	9	17	23	3	5	15	0	9	NA	NA	NA	NA	7	1
C12orf71	0	0	301	NA	16	16	13	24	7	21	21	13	8	14	27	17	5	11	23	32	14	6	3	10	0	23	NA	NA	NA	NA	17	3
C12orf73	0	0	71	NA	6	4	0	1	1	7	3	4	2	2	9	7	4	1	7	3	3	0	3	4	0	7	NA	NA	NA	NA	5	1
C12orf74	0	0	190	NA	8	17	3	7	8	11	12	12	6	3	23	5	1	5	24	22	11	3	4	5	0	24	NA	NA	NA	NA	20	2
C12orf75	0	0	73	NA	7	4	5	3	1	6	3	9	0	1	1	5	3	0	2	7	7	0	2	7	0	2	NA	NA	NA	NA	2	0
C12orf76	0	0	135	NA	13	8	4	4	8	9	9	10	7	9	9	4	3	7	9	8	5	2	1	6	0	9	NA	NA	NA	NA	9	0
C12orf77	0	0	145	NA	10	8	8	5	3	4	4	5	4	11	13	8	5	6	12	14	15	2	3	5	0	12	NA	NA	NA	NA	12	0
C13orf15	0	0	137	NA	25	5	2	13	1	10	2	3	4	1	13	7	3	8	8	21	6	0	2	3	0	8	NA	NA	NA	NA	6	1
C13orf16	0	0	151	NA	11	5	2	10	6	13	4	7	2	12	10	12	2	4	10	14	6	0	7	14	0	10	NA	NA	NA	NA	8	1
C13orf26	0	0	289	NA	10	14	12	18	5	11	19	8	10	14	28	28	4	10	20	29	23	5	14	7	0	20	NA	NA	NA	NA	18	1
C13orf27	0	0	227	NA	14	8	9	11	7	12	6	15	14	14	25	21	9	10	8	16	8	2	5	13	0	8	NA	NA	NA	NA	8	0
C13orf30	0	0	139	NA	9	17	5	2	1	2	16	3	2	7	15	7	3	2	10	12	7	3	7	9	0	10	NA	NA	NA	NA	8	1
C13orf33	0	0	303	NA	17	19	14	14	5	22	11	17	1	12	35	16	5	22	17	31	13	2	10	20	0	17	NA	NA	NA	NA	15	1
C13orf35	0	0	121	NA	10	10	2	9	5	4	9	8	0	3	14	6	3	0	9	12	6	3	4	4	0	9	NA	NA	NA	NA	7	1
C14orf1	0	0	140	NA	8	8	6	2	2	4	3	9	4	9	24	5	5	8	4	10	10	3	5	11	0	4	NA	NA	NA	NA	4	0
C14orf101	0	0	707	NA	59	32	33	19	14	37	25	47	18	36	90	32	17	40	32	51	32	19	26	48	0	32	NA	NA	NA	NA	28	2
C14orf102	0	0	1164	NA	78	63	35	61	22	98	58	61	28	42	126	98	19	52	61	103	54	28	26	51	0	61	NA	NA	NA	NA	55	3
C14orf105	0	0	336	NA	18	28	15	18	2	27	22	13	12	13	37	27	11	7	20	27	17	4	7	11	0	20	NA	NA	NA	NA	16	2
C14orf109	0	0	169	NA	13	9	4	4	4	8	8	8	5	10	22	4	6	10	10	12	10	5	8	9	0	10	NA	NA	NA	NA	8	1
C14orf118	0	0	482	NA	40	44	14	28	16	39	18	20	16	7	34	32	8	14	28	59	30	9	6	20	0	28	NA	NA	NA	NA	26	1
C14orf119	0	0	140	NA	10	6	4	6	2	12	9	4	3	3	16	5	4	9	14	16	3	5	2	7	0	14	NA	NA	NA	NA	10	2
C14orf126	0	0	168	NA	13	9	9	5	4	13	10	14	5	8	20	10	3	6	6	7	7	1	4	14	0	6	NA	NA	NA	NA	6	0
C14orf129	0	0	139	NA	11	7	8	11	3	15	4	8	2	1	16	5	6	6	3	9	7	0	6	11	0	3	NA	NA	NA	NA	3	0
C14orf132	0	0	173	NA	18	10	3	5	2	8	11	11	6	6	30	8	4	9	16	9	5	2	1	9	0	16	NA	NA	NA	NA	14	1
C14orf135	3	2	1172	PPP:262:264 PPP:802:804	62	40	36	47	20	66	38	70	27	78	166	55	32	66	62	81	75	24	48	79	6	56	262	0.223549	804	0.686007	52	2
C14orf142	0	0	100	NA	7	4	4	14	1	10	6	10	1	1	8	5	3	3	8	4	3	0	1	7	0	8	NA	NA	NA	NA	8	0
C14orf144	0	0	54	NA	7	1	0	1	2	4	2	3	1	1	9	2	1	0	4	6	4	2	1	3	0	4	NA	NA	NA	NA	4	0
C14orf149	0	0	354	NA	38	21	5	24	8	17	6	32	15	11	34	14	9	17	22	18	20	0	9	34	0	22	NA	NA	NA	NA	18	2
C14orf159	0	0	621	NA	59	27	13	26	17	38	26	54	21	33	62	31	15	19	48	42	26	6	12	46	0	48	NA	NA	NA	NA	38	5
C14orf162	0	0	88	NA	5	2	3	3	1	1	5	6	3	4	12	4	2	7	5	14	2	2	0	7	0	5	NA	NA	NA	NA	5	0
C14orf164	0	0	300	NA	16	21	7	6	8	15	22	19	11	9	24	17	4	17	18	41	22	3	7	13	0	18	NA	NA	NA	NA	18	0
C14orf166	0	0	244	NA	23	16	17	22	2	16	11	10	7	17	29	19	3	9	8	3	9	3	6	14	0	8	NA	NA	NA	NA	8	0
C14orf166B	0	0	488	NA	24	16	35	23	7	40	18	32	9	29	60	32	20	19	20	36	21	3	11	33	0	20	NA	NA	NA	NA	16	2
C14orf176	0	0	217	NA	22	14	5	2	4	17	12	17	8	3	35	4	5	6	11	15	11	3	1	22	0	11	NA	NA	NA	NA	9	1
C14orf177	0	0	125	NA	9	9	2	0	9	10	10	8	7	3	7	9	5	4	7	13	11	0	0	2	0	7	NA	NA	NA	NA	7	0
C14orf178	0	0	122	NA	7	6	3	6	3	10	6	10	7	2	8	4	4	6	12	14	8	1	1	4	0	12	NA	NA	NA	NA	8	2
C14orf180	0	0	177	NA	28	31	4	4	4	8	4	16	4	3	8	5	1	1	25	8	11	3	1	8	0	25	NA	NA	NA	NA	19	3
C14orf182	0	0	107	NA	7	15	2	5	4	3	3	5	6	1	10	6	3	4	6	14	5	2	0	6	0	6	NA	NA	NA	NA	4	1
C14orf183	0	0	324	NA	22	14	7	9	10	24	22	30	12	13	24	11	7	8	28	28	17	12	3	23	0	28	NA	NA	NA	NA	22	3
C14orf2	0	0	99	NA	6	4	4	1	1	6	7	8	2	13	9	6	5	4	5	6	2	2	4	4	0	5	NA	NA	NA	NA	3	1
C14orf21	3	1	636	PPP:41:43	65	49	10	20	13	50	36	47	20	13	98	19	6	20	40	45	27	4	8	46	3	37	41	0.0644654	43	0.0676101	35	1
C14orf28	0	0	310	NA	11	14	21	12	10	25	11	15	12	19	38	18	7	18	13	17	14	6	14	15	0	13	NA	NA	NA	NA	7	3
C14orf37	0	0	812	NA	53	29	23	47	9	96	39	51	10	24	69	32	27	24	49	80	82	6	9	53	0	49	NA	NA	NA	NA	47	1
C14orf38	0	0	793	NA	46	41	39	30	8	110	53	13	12	50	100	94	18	23	8	35	50	6	22	35	0	8	NA	NA	NA	NA	8	0
C14orf39	0	0	587	NA	17	25	35	32	11	65	34	17	15	32	38	52	10	35	24	61	40	3	17	24	0	24	NA	NA	NA	NA	22	1
C14orf43	4	7	1045	PPP:29:31 PPP:65:67 PPP:128:130 PPPP:234:237 PPP:385:387 PPP:656:658 PPP:683:685	83	70	32	29	9	82	89	73	24	30	86	60	16	28	126	81	48	7	18	54	22	104	29	0.0277512	685	0.655502	88	8
C14orf45	0	0	529	NA	29	30	22	30	3	58	45	16	15	30	54	69	13	14	9	28	26	3	10	25	0	9	NA	NA	NA	NA	7	1
C14orf49	3	1	975	PPP:972:974	82	79	24	45	11	101	81	44	23	25	156	50	21	28	38	54	33	21	10	49	3	35	972	0.996923	974	0.998974	35	0
C14orf57	0	0	127	NA	9	12	2	3	2	11	6	9	3	6	9	6	9	4	6	8	6	4	3	9	0	6	NA	NA	NA	NA	6	0
C14orf79	0	0	325	NA	16	20	5	12	14	29	19	26	8	12	33	16	5	11	23	39	21	5	1	10	0	23	NA	NA	NA	NA	17	3
C14orf80	3	1	495	PPP:491:493	65	53	4	17	14	39	29	42	8	6	68	7	8	9	40	30	11	15	3	27	3	37	491	0.991919	493	0.99596	35	1
C14orf93	3	2	538	PPP:40:42 PPP:247:249	43	35	26	24	12	51	20	41	12	12	55	29	5	14	44	48	23	3	10	31	6	38	40	0.0743494	249	0.462825	28	5
C15orf17	0	0	198	NA	18	17	5	15	6	8	9	18	2	4	19	9	4	1	17	26	7	1	5	7	0	17	NA	NA	NA	NA	13	2
C15orf2	3	5	1156	PPP:117:119 PPP:285:287 PPP:352:354 PPP:524:526 PPP:674:676	97	51	35	38	16	41	45	84	21	45	92	41	23	37	168	148	98	5	16	55	15	153	117	0.101211	676	0.584775	121	16
C15orf23	0	0	316	NA	21	17	12	16	5	32	22	14	4	2	44	28	9	6	15	20	28	1	3	17	0	15	NA	NA	NA	NA	9	3
C15orf24	0	0	242	NA	12	14	6	12	0	12	4	23	3	8	20	14	13	11	16	30	7	4	6	27	0	16	NA	NA	NA	NA	14	1
C15orf26	0	0	301	NA	16	19	13	23	5	19	13	19	12	10	36	15	10	9	16	17	16	4	10	19	0	16	NA	NA	NA	NA	14	1
C15orf27	3	1	531	PPP:426:428	46	22	14	26	7	42	38	20	7	33	56	17	12	18	36	58	21	7	8	43	3	33	426	0.80226	428	0.806026	33	0
C15orf29	0	0	304	NA	12	14	19	13	8	19	14	14	10	15	34	29	5	9	12	28	12	5	10	22	0	12	NA	NA	NA	NA	12	0
C15orf32	0	0	178	NA	6	13	8	8	8	7	9	8	9	8	20	11	4	5	14	14	10	2	3	11	0	14	NA	NA	NA	NA	10	2
C15orf33	0	0	508	NA	27	26	18	22	7	46	18	14	17	36	45	53	8	36	22	51	23	12	18	9	0	22	NA	NA	NA	NA	20	1
C15orf38	0	0	226	NA	20	14	8	16	2	20	4	22	7	8	21	15	6	6	9	13	14	4	5	12	0	9	NA	NA	NA	NA	9	0
C15orf39	3	2	1047	PPP:270:272 PPP:275:277	115	54	11	40	26	51	50	74	24	13	108	39	12	23	177	96	56	10	24	44	6	171	270	0.25788	277	0.264565	131	20
C15orf40	0	0	167	NA	23	9	4	5	4	9	5	12	4	6	22	11	2	0	13	16	10	0	2	10	0	13	NA	NA	NA	NA	9	2
C15orf41	0	0	281	NA	18	13	10	15	9	18	17	12	14	21	32	14	3	10	14	19	9	4	13	16	0	14	NA	NA	NA	NA	10	2
C15orf42	5	2	1910	PPPPP:1374:1378 PPP:1829:1831	123	132	34	89	35	138	89	99	47	53	187	127	34	49	172	239	120	24	22	97	8	164	1374	0.719372	1831	0.958639	140	12
C15orf43	0	0	220	NA	15	9	11	11	3	15	11	11	9	16	17	17	5	13	10	15	9	3	9	11	0	10	NA	NA	NA	NA	8	1
C15orf44	0	0	518	NA	34	17	24	30	10	36	24	32	12	26	62	27	16	21	34	34	29	5	12	33	0	34	NA	NA	NA	NA	32	1
C15orf48	0	0	83	NA	4	3	3	3	0	5	6	2	0	5	8	8	3	4	6	4	6	3	1	9	0	6	NA	NA	NA	NA	6	0
C15orf52	3	1	534	PPP:301:303	52	58	6	21	9	47	37	64	5	10	37	21	8	2	52	47	22	11	2	23	3	49	301	0.56367	303	0.567416	45	2
C15orf53	0	0	179	NA	12	17	3	6	7	7	11	15	4	5	19	8	2	6	13	22	8	4	2	8	0	13	NA	NA	NA	NA	13	0
C15orf54	0	0	183	NA	11	13	8	3	3	10	12	9	9	13	22	8	6	9	9	14	10	4	2	8	0	9	NA	NA	NA	NA	9	0
C15orf55	4	2	1160	PPP:73:75 PPPP:190:193	90	59	23	48	20	97	68	116	20	25	119	56	20	20	132	109	52	10	14	62	7	125	73	0.062931	193	0.166379	101	12
C15orf56	0	0	161	NA	22	23	2	1	5	6	5	21	0	1	12	2	1	3	25	11	8	7	0	6	0	25	NA	NA	NA	NA	19	3
C15orf57	0	0	194	NA	20	9	4	15	4	22	13	9	1	3	16	13	4	9	12	16	6	4	2	12	0	12	NA	NA	NA	NA	10	1
C15orf58	0	0	385	NA	34	25	12	18	4	22	23	29	13	14	54	8	3	16	36	22	13	5	7	27	0	36	NA	NA	NA	NA	28	4
C15orf59	0	0	293	NA	16	22	5	23	3	26	11	25	6	7	19	12	6	8	26	32	24	2	4	16	0	26	NA	NA	NA	NA	24	1
C15orf60	0	0	266	NA	19	12	5	9	9	22	20	23	5	10	30	13	2	11	18	19	15	4	4	16	0	18	NA	NA	NA	NA	14	2
C15orf61	0	0	157	NA	15	14	6	3	4	6	5	8	7	3	19	5	2	9	10	9	9	5	7	11	0	10	NA	NA	NA	NA	10	0
C15orf62	3	1	175	PPP:98:100	11	17	3	7	2	13	9	9	3	3	23	5	2	8	19	22	8	2	4	5	3	16	98	0.56	100	0.571429	12	2
C15orf63	0	0	129	NA	12	13	3	7	0	24	3	6	2	7	10	9	6	0	4	8	8	0	1	6	0	4	NA	NA	NA	NA	2	1
C16orf11	4	3	571	PPPP:140:143 PPP:191:193 PPP:526:528	56	39	3	20	12	27	18	68	13	5	62	20	6	8	101	46	24	7	11	25	10	91	140	0.245184	528	0.924694	83	4
C16orf3	0	0	117	NA	14	5	0	1	9	5	6	8	5	2	4	3	3	0	16	20	7	2	0	7	0	16	NA	NA	NA	NA	14	1
C16orf42	0	0	312	NA	38	30	6	17	10	25	11	35	4	5	30	11	3	11	24	18	8	4	5	17	0	24	NA	NA	NA	NA	24	0
C16orf45	3	1	204	PPP:177:179	14	15	3	13	4	27	12	4	2	12	24	23	10	3	9	8	10	1	1	9	3	6	177	0.867647	179	0.877451	6	0
C16orf46	0	0	395	NA	30	18	15	17	12	28	18	23	7	17	37	35	3	8	34	36	22	7	7	21	0	34	NA	NA	NA	NA	28	3
C16orf47	0	0	133	NA	6	10	3	2	2	6	8	10	6	5	13	7	1	1	9	24	4	3	3	10	0	9	NA	NA	NA	NA	9	0
C16orf48	3	1	346	PPP:176:178	27	39	6	16	5	27	25	25	11	10	38	19	4	5	36	22	11	2	4	14	3	33	176	0.508671	178	0.514451	27	3
C16orf5	4	4	208	PPPP:5:8 PPP:38:40 PPP:51:53 PPP:84:86	11	2	2	5	11	7	6	24	6	9	11	5	9	8	47	9	15	0	12	9	13	34	5	0.0240385	86	0.413462	20	7
C16orf53	3	1	254	PPP:107:109	22	19	0	18	2	44	9	21	4	4	20	10	4	4	25	26	11	2	2	7	3	22	107	0.42126	109	0.429134	18	2
C16orf54	0	0	224	NA	25	20	2	4	2	18	9	17	1	5	20	1	3	6	38	15	15	10	1	12	0	38	NA	NA	NA	NA	28	5
C16orf55	3	1	140	PPP:63:65	9	10	3	6	1	14	7	7	5	4	6	18	2	0	12	19	6	1	3	7	3	9	63	0.45	65	0.464286	9	0
C16orf57	0	0	265	NA	13	19	6	14	3	20	14	17	12	4	27	9	7	18	15	20	15	3	6	23	0	15	NA	NA	NA	NA	15	0
C16orf58	0	0	468	NA	49	22	13	19	8	25	22	40	8	8	64	20	11	17	24	34	22	16	7	39	0	24	NA	NA	NA	NA	22	1
C16orf59	3	1	433	PPP:52:54	57	38	3	12	11	27	31	32	8	4	58	15	9	4	40	31	25	5	2	21	3	37	52	0.120092	54	0.124711	29	4
C16orf61	0	0	79	NA	1	5	8	3	4	10	0	2	6	3	9	9	2	3	4	3	2	0	2	3	0	4	NA	NA	NA	NA	2	1
C16orf62	0	0	1052	NA	77	56	45	55	29	64	37	44	27	50	119	68	32	53	44	88	57	11	25	71	0	44	NA	NA	NA	NA	40	2
C16orf7	3	1	631	PPP:558:560	72	42	11	19	17	52	37	34	10	20	86	29	11	10	62	46	30	3	17	23	3	59	558	0.884311	560	0.88748	45	7
C16orf70	0	0	422	NA	24	15	23	19	10	20	20	27	18	19	44	25	11	25	26	30	20	3	16	27	0	26	NA	NA	NA	NA	24	1
C16orf71	0	0	520	NA	60	33	9	33	9	47	36	41	7	8	50	22	13	6	48	53	21	8	1	15	0	48	NA	NA	NA	NA	38	5
C16orf72	3	1	275	PPP:152:154	24	24	11	12	4	23	18	14	10	11	20	12	4	7	16	25	17	5	3	15	3	13	152	0.552727	154	0.56	9	2
C16orf73	0	0	471	NA	26	22	29	28	13	31	8	20	11	34	43	32	7	21	12	48	36	4	14	32	0	12	NA	NA	NA	NA	12	0
C16orf74	0	0	76	NA	2	1	1	9	3	4	1	6	2	4	7	3	5	1	8	9	5	1	0	4	0	8	NA	NA	NA	NA	6	1
C16orf78	0	0	265	NA	12	22	7	18	3	20	12	13	3	8	22	36	17	5	14	17	15	3	6	12	0	14	NA	NA	NA	NA	14	0
C16orf79	0	0	228	NA	18	17	4	9	11	10	13	14	5	8	29	5	5	4	21	14	13	4	5	19	0	21	NA	NA	NA	NA	17	2
C16orf80	0	0	193	NA	6	15	12	11	3	7	10	7	2	16	18	16	4	12	8	10	14	2	9	11	0	8	NA	NA	NA	NA	8	0
C16orf85	0	0	147	NA	16	9	2	4	3	10	7	10	4	6	17	8	2	3	12	14	6	2	2	10	0	12	NA	NA	NA	NA	12	0
C16orf86	0	0	317	NA	36	16	3	8	4	39	18	28	8	2	36	19	3	1	39	22	9	0	4	22	0	39	NA	NA	NA	NA	35	2
C16orf87	0	0	154	NA	12	18	9	5	5	15	4	3	5	10	7	20	2	3	6	16	5	0	2	7	0	6	NA	NA	NA	NA	4	1
C16orf88	0	0	458	NA	32	27	11	26	3	41	17	29	10	10	27	80	9	12	29	38	21	5	6	25	0	29	NA	NA	NA	NA	29	0
C16orf89	0	0	440	NA	31	31	7	18	11	28	28	35	8	14	64	14	11	20	26	40	15	10	12	17	0	26	NA	NA	NA	NA	18	4
C16orf90	3	1	191	PPP:82:84	16	14	3	6	6	9	10	21	5	1	27	6	3	1	26	21	7	5	2	1	3	23	82	0.429319	84	0.439791	21	1
C16orf91	4	2	356	PPP:121:123 PPPP:146:149	34	31	7	16	9	14	18	30	11	6	38	6	8	12	35	33	17	11	3	17	7	28	121	0.339888	149	0.418539	20	4
C16orf92	0	0	132	NA	14	8	3	5	2	4	5	12	4	6	13	4	1	13	10	8	5	2	1	12	0	10	NA	NA	NA	NA	8	1
C16orf93	3	1	331	PPP:68:70	25	22	6	10	8	37	17	12	11	7	43	21	7	13	22	21	20	3	9	17	3	19	68	0.205438	70	0.21148	11	4
C16orf95	0	0	158	NA	19	16	1	1	12	4	5	14	8	1	10	3	4	2	17	19	9	3	3	7	0	17	NA	NA	NA	NA	13	2
C16orf96	3	2	1141	PPP:380:382 PPP:424:426	116	62	24	72	12	72	67	67	23	43	130	77	30	19	105	78	46	17	15	66	6	99	380	0.333041	426	0.373357	85	7
C17orf100	0	0	164	NA	11	22	1	2	2	12	7	9	6	3	9	7	4	2	14	29	15	0	1	8	0	14	NA	NA	NA	NA	12	1
C17orf101	0	0	331	NA	34	32	8	14	8	28	7	33	10	11	24	12	5	17	13	24	17	4	10	20	0	13	NA	NA	NA	NA	9	2
C17orf102	0	0	167	NA	16	16	3	4	4	6	5	20	5	4	15	2	5	8	12	15	12	2	1	12	0	12	NA	NA	NA	NA	12	0
C17orf104	0	0	952	NA	47	49	69	54	21	57	53	49	30	30	76	57	19	40	55	96	66	7	35	42	0	55	NA	NA	NA	NA	53	1
C17orf105	0	0	164	NA	7	16	15	7	2	9	9	4	7	11	13	16	2	3	6	10	9	2	8	8	0	6	NA	NA	NA	NA	4	1
C17orf107	0	0	190	NA	23	11	0	4	2	11	14	21	4	3	29	4	4	4	14	20	7	3	2	10	0	14	NA	NA	NA	NA	10	2
C17orf108	0	0	123	NA	8	10	1	3	5	4	4	12	5	3	14	6	6	5	8	15	7	2	1	4	0	8	NA	NA	NA	NA	8	0
C17orf109	0	0	77	NA	7	6	0	1	7	5	5	2	1	4	11	2	2	3	6	2	5	0	0	8	0	6	NA	NA	NA	NA	4	1
C17orf110	0	0	62	NA	5	0	3	3	1	6	4	4	0	6	9	1	1	5	1	1	5	3	0	4	0	1	NA	NA	NA	NA	1	0
C17orf28	0	0	788	NA	50	40	27	43	11	46	36	39	22	38	98	31	12	42	53	62	50	15	19	54	0	53	NA	NA	NA	NA	45	4
C17orf39	4	2	300	PPP:91:93 PPPP:106:109	27	22	6	13	5	15	12	24	9	10	24	15	3	14	28	25	14	5	16	13	7	21	91	0.303333	109	0.363333	19	1
C17orf42	0	0	360	NA	19	25	16	14	6	24	15	12	9	21	43	25	9	23	14	36	16	5	9	19	0	14	NA	NA	NA	NA	14	0
C17orf46	3	1	384	PPP:233:235	30	11	14	18	6	42	25	13	12	16	43	19	10	10	41	40	18	3	2	11	3	38	233	0.606771	235	0.611979	30	4
C17orf47	0	0	570	NA	29	39	12	18	7	38	31	29	22	16	41	30	5	12	65	81	35	8	15	37	0	65	NA	NA	NA	NA	53	6
C17orf48	0	0	342	NA	16	14	20	24	7	23	15	19	17	12	29	15	9	22	18	24	11	5	17	25	0	18	NA	NA	NA	NA	18	0
C17orf49	3	2	233	PPP:152:154 PPP:157:159	23	6	9	14	4	14	7	17	2	10	23	18	4	8	20	21	10	1	6	15	6	14	152	0.652361	159	0.682403	8	3
C17orf50	0	0	174	NA	14	17	2	10	8	24	5	16	5	1	18	9	1	2	13	11	6	3	2	7	0	13	NA	NA	NA	NA	9	2
C17orf51	0	0	221	NA	19	22	2	7	10	11	9	12	7	5	23	11	4	4	29	27	9	4	2	4	0	29	NA	NA	NA	NA	23	3
C17orf53	0	0	647	NA	49	36	14	25	13	42	46	40	14	18	67	21	11	22	70	71	39	4	3	42	0	70	NA	NA	NA	NA	68	1
C17orf56	3	1	525	PPP:418:420	54	33	7	22	13	27	23	45	15	12	63	13	5	15	55	72	23	4	5	19	3	52	418	0.79619	420	0.8	44	4
C17orf57	0	0	973	NA	45	27	59	63	19	82	34	32	20	72	101	108	23	37	29	95	49	2	22	54	0	29	NA	NA	NA	NA	27	1
C17orf58	0	0	97	NA	3	12	3	3	3	2	5	8	4	5	11	5	3	5	6	8	3	0	4	4	0	6	NA	NA	NA	NA	6	0
C17orf59	5	1	357	PPPPP:231:235	34	36	7	15	7	35	11	47	7	7	34	6	4	3	34	35	15	0	2	18	5	29	231	0.647059	235	0.658263	23	3
C17orf61	0	0	113	NA	21	3	1	3	2	1	3	14	5	1	22	4	1	7	6	7	5	2	4	1	0	6	NA	NA	NA	NA	6	0
C17orf62	0	0	261	NA	29	23	0	9	8	8	14	17	13	5	22	3	3	1	43	20	9	14	1	19	0	43	NA	NA	NA	NA	41	1
C17orf63	3	1	562	PPP:179:181	66	20	21	16	8	10	48	39	29	16	53	18	14	10	72	42	40	3	12	25	3	69	179	0.318505	181	0.322064	57	6
C17orf64	0	0	236	NA	12	16	4	12	5	16	14	11	8	5	30	27	6	7	16	22	10	4	5	6	0	16	NA	NA	NA	NA	16	0
C17orf65	3	1	193	PPP:144:146	31	22	1	1	7	2	9	23	6	1	13	5	1	1	37	16	4	8	1	4	3	34	144	0.746114	146	0.756477	26	4
C17orf66	0	0	570	NA	40	34	15	19	14	47	38	15	14	25	70	54	20	16	38	32	27	7	13	32	0	38	NA	NA	NA	NA	34	2
C17orf67	0	0	114	NA	5	11	3	5	2	9	6	2	7	2	16	7	4	4	9	9	5	2	1	5	0	9	NA	NA	NA	NA	9	0
C17orf69	0	0	157	NA	13	10	6	2	6	11	6	22	6	3	10	10	2	1	13	10	13	5	4	4	0	13	NA	NA	NA	NA	11	1
C17orf70	0	0	881	NA	83	49	12	47	38	50	35	72	21	24	121	17	13	19	75	75	46	6	13	65	0	75	NA	NA	NA	NA	67	4
C17orf72	3	1	236	PPP:186:188	20	14	1	5	6	18	13	10	6	3	26	2	9	4	45	18	11	7	5	13	3	42	186	0.788136	188	0.79661	36	3
C17orf74	4	3	501	PPP:230:232 PPPP:280:283 PPP:440:442	29	49	20	18	10	24	35	25	28	10	43	11	9	9	56	58	14	13	15	25	10	46	230	0.459082	442	0.882236	36	5
C17orf75	0	0	396	NA	21	19	19	17	12	43	16	26	7	14	44	23	11	21	15	39	13	2	12	22	0	15	NA	NA	NA	NA	13	1
C17orf77	0	0	243	NA	11	14	6	6	18	17	9	19	6	4	34	8	1	6	24	29	14	2	5	10	0	24	NA	NA	NA	NA	22	1
C17orf78	0	0	275	NA	17	14	9	10	8	13	17	14	4	21	25	25	2	9	16	25	22	4	4	16	0	16	NA	NA	NA	NA	14	1
C17orf79	3	1	184	PPP:162:164	19	6	5	19	3	21	11	15	4	5	9	5	5	5	20	15	7	4	4	2	3	17	162	0.880435	164	0.891304	11	3
C17orf80	0	0	609	NA	29	30	19	23	19	40	31	38	12	18	60	58	15	17	46	62	49	5	9	29	0	46	NA	NA	NA	NA	40	3
C17orf81	0	0	316	NA	18	18	4	25	7	23	15	23	11	9	45	9	4	11	24	29	16	4	4	17	0	24	NA	NA	NA	NA	22	1
C17orf82	0	0	251	NA	30	26	1	10	3	11	8	44	5	2	24	3	1	7	32	26	10	2	2	4	0	32	NA	NA	NA	NA	28	2
C17orf84	0	0	144	NA	7	9	3	1	7	3	8	2	8	3	21	8	4	7	16	11	13	4	1	8	0	16	NA	NA	NA	NA	14	1
C17orf85	0	0	620	NA	41	56	22	48	2	76	18	28	11	23	43	53	17	9	33	68	18	5	14	35	0	33	NA	NA	NA	NA	27	3
C17orf89	0	0	74	NA	17	9	1	1	5	5	1	8	0	0	5	3	1	4	2	5	2	1	1	3	0	2	NA	NA	NA	NA	2	0
C17orf90	0	0	147	NA	16	16	3	7	7	9	7	18	6	1	13	3	3	5	11	7	4	1	1	9	0	11	NA	NA	NA	NA	5	3
C17orf96	3	3	379	PPP:215:217 PPP:293:295 PPP:347:349	51	34	4	11	11	19	9	38	5	2	30	11	3	11	81	27	16	6	1	9	9	72	215	0.567282	349	0.920844	54	9
C17orf97	0	0	423	NA	33	25	9	31	4	35	6	42	23	10	42	45	2	19	51	24	11	1	4	6	0	51	NA	NA	NA	NA	47	2
C17orf98	0	0	154	NA	11	15	6	9	1	3	9	16	8	6	12	4	1	8	8	9	8	3	9	8	0	8	NA	NA	NA	NA	4	2
C17orf99	4	1	300	PPPP:41:44	27	16	10	6	10	14	15	23	8	11	27	11	4	8	28	27	20	9	5	21	4	24	41	0.136667	44	0.146667	20	2
C18orf1	3	3	306	PPP:54:56 PPP:180:182 PPP:251:253	15	21	17	14	11	19	17	20	9	17	20	6	7	13	30	30	15	1	7	17	9	21	54	0.176471	253	0.826797	15	3
C18orf21	0	0	220	NA	11	14	10	7	6	7	8	8	7	3	24	29	4	9	11	29	18	1	5	9	0	11	NA	NA	NA	NA	11	0
C18orf25	0	0	403	NA	32	21	13	29	4	40	19	25	10	9	26	21	7	1	16	63	27	4	5	31	0	16	NA	NA	NA	NA	12	2
C18orf26	0	0	210	NA	15	5	13	9	12	11	6	9	6	14	12	8	5	1	14	23	25	4	3	15	0	14	NA	NA	NA	NA	10	2
C18orf32	0	0	76	NA	2	1	4	4	3	3	1	4	0	8	5	11	2	3	8	3	3	2	3	6	0	8	NA	NA	NA	NA	8	0
C18orf34	0	0	891	NA	49	42	44	51	11	106	55	18	22	56	91	107	22	28	12	60	47	9	24	37	0	12	NA	NA	NA	NA	12	0
C18orf42	0	0	69	NA	4	4	4	2	0	9	9	4	2	4	4	7	1	1	3	4	1	0	0	6	0	3	NA	NA	NA	NA	3	0
C18orf54	0	0	533	NA	19	23	38	41	15	27	28	22	16	21	49	48	9	23	28	68	24	3	14	17	0	28	NA	NA	NA	NA	28	0
C18orf56	0	0	123	NA	16	25	1	1	7	2	2	9	3	2	7	2	2	1	19	10	6	1	1	6	0	19	NA	NA	NA	NA	17	1
C18orf62	0	0	101	NA	7	9	6	3	0	5	5	5	4	5	11	6	3	9	3	7	6	1	1	5	0	3	NA	NA	NA	NA	1	1
C18orf63	0	0	685	NA	34	30	40	21	15	27	46	27	24	45	66	64	19	25	36	74	33	4	15	40	0	36	NA	NA	NA	NA	34	1
C18orf8	0	0	657	NA	39	30	27	29	13	40	35	25	23	35	73	41	16	39	33	49	31	4	22	53	0	33	NA	NA	NA	NA	31	1
C19orf10	0	0	173	NA	23	7	3	4	2	14	6	15	5	3	11	9	4	9	8	13	13	4	6	14	0	8	NA	NA	NA	NA	8	0
C19orf12	0	0	152	NA	18	5	2	4	1	10	9	16	3	6	20	9	10	3	7	6	7	2	2	12	0	7	NA	NA	NA	NA	3	2
C19orf18	0	0	215	NA	13	10	12	5	3	19	9	12	7	17	25	19	6	8	12	18	9	0	4	7	0	12	NA	NA	NA	NA	10	1
C19orf21	0	0	679	NA	61	66	15	37	3	57	42	47	18	18	45	22	5	12	66	59	35	13	14	44	0	66	NA	NA	NA	NA	58	4
C19orf24	3	1	132	PPP:41:43	14	11	4	3	2	7	4	9	2	2	23	2	2	5	15	10	9	0	3	5	3	12	41	0.310606	43	0.325758	8	2
C19orf25	0	0	161	NA	18	11	2	5	1	8	12	15	2	4	19	3	4	5	22	7	8	2	2	11	0	22	NA	NA	NA	NA	16	3
C19orf26	3	2	725	PPP:399:401 PPP:501:503	105	60	8	48	8	40	24	74	22	11	54	18	6	19	77	62	49	7	9	24	6	71	399	0.550345	503	0.693793	53	9
C19orf29	3	2	867	PPP:600:602 PPP:734:736	60	80	22	46	8	84	48	62	25	26	68	53	18	35	70	61	33	18	22	28	6	64	600	0.692042	736	0.848904	48	8
C19orf33	0	0	106	NA	9	1	0	6	0	7	4	15	7	1	3	20	1	1	9	16	2	0	0	4	0	9	NA	NA	NA	NA	9	0
C19orf35	3	1	473	PPP:56:58	59	36	5	11	10	26	18	39	13	5	81	7	3	7	61	31	24	12	5	20	3	58	56	0.118393	58	0.122622	44	7
C19orf38	0	0	230	NA	19	11	9	10	4	8	11	15	3	7	25	7	4	12	21	26	17	3	3	15	0	21	NA	NA	NA	NA	19	1
C19orf40	0	0	215	NA	13	10	9	6	3	13	19	14	3	10	28	15	5	7	14	12	8	1	4	21	0	14	NA	NA	NA	NA	12	1
C19orf42	0	0	103	NA	5	5	5	3	4	5	2	7	0	12	16	7	5	9	2	5	6	2	1	2	0	2	NA	NA	NA	NA	2	0
C19orf43	3	1	176	PPP:84:86	18	13	3	9	1	15	8	29	1	1	8	17	3	4	14	14	6	2	2	8	3	11	84	0.477273	86	0.488636	11	0
C19orf44	0	0	657	NA	74	40	23	38	2	54	32	23	17	17	59	34	14	16	38	91	43	2	7	33	0	38	NA	NA	NA	NA	34	2
C19orf45	4	3	505	PPP:61:63 PPP:87:89 PPPP:336:339	36	42	8	25	12	27	32	32	24	9	48	21	12	22	67	27	29	6	16	10	10	57	61	0.120792	339	0.671287	37	10
C19orf46	0	0	404	NA	35	27	6	17	8	29	28	46	13	7	61	6	4	8	39	29	12	8	5	16	0	39	NA	NA	NA	NA	31	4
C19orf47	0	0	422	NA	55	31	9	16	3	22	12	26	5	15	31	30	13	7	25	48	35	3	3	33	0	25	NA	NA	NA	NA	19	3
C19orf48	3	1	117	PPP:67:69	9	12	0	3	4	8	4	9	2	5	15	1	2	0	13	8	9	6	2	5	3	10	67	0.57265	69	0.589744	8	1
C19orf51	0	0	608	NA	63	50	14	29	8	43	27	51	16	11	73	11	8	23	49	42	29	13	8	40	0	49	NA	NA	NA	NA	41	4
C19orf52	0	0	260	NA	40	29	4	15	5	18	12	17	4	1	35	6	2	9	11	11	6	9	7	19	0	11	NA	NA	NA	NA	11	0
C19orf53	0	0	99	NA	17	6	2	1	0	3	6	6	2	3	6	21	2	1	6	8	3	0	0	6	0	6	NA	NA	NA	NA	6	0
C19orf54	4	2	351	PPP:53:55 PPPP:59:62	23	17	3	16	8	15	18	32	10	6	48	14	4	9	52	26	13	6	7	24	7	45	53	0.150997	62	0.176638	29	8
C19orf55	4	1	479	PPPP:381:384	63	33	6	24	2	25	30	21	6	8	48	15	2	11	63	71	24	10	3	14	4	59	381	0.795407	384	0.80167	49	5
C19orf57	0	0	668	NA	58	35	11	44	10	56	41	82	13	11	54	25	9	11	78	64	32	4	3	27	0	78	NA	NA	NA	NA	66	6
C19orf59	0	0	187	NA	14	9	7	8	4	12	16	7	4	12	16	16	6	5	9	15	7	3	4	13	0	9	NA	NA	NA	NA	7	1
C19orf6	0	0	620	NA	65	30	19	26	5	36	17	42	16	27	65	10	21	42	55	54	26	7	19	38	0	55	NA	NA	NA	NA	45	5
C19orf60	0	0	201	NA	27	23	0	6	1	22	15	13	4	5	21	4	5	4	12	6	12	4	3	14	0	12	NA	NA	NA	NA	12	0
C19orf63	0	0	269	NA	28	19	6	10	6	18	12	40	5	5	30	5	6	8	14	20	11	2	4	20	0	14	NA	NA	NA	NA	10	2
C19orf66	0	0	291	NA	16	27	7	21	12	25	13	19	12	6	21	18	6	7	22	23	9	5	5	17	0	22	NA	NA	NA	NA	18	2
C19orf67	3	1	358	PPP:19:21	29	20	3	18	8	23	23	24	2	12	44	9	6	14	44	28	19	7	16	9	3	41	19	0.0530726	21	0.0586592	31	5
C19orf68	3	1	627	PPP:6:8	68	73	5	33	17	48	28	60	10	8	74	19	6	24	40	27	20	17	11	39	3	37	6	0.00956938	8	0.0127592	33	2
C19orf69	3	1	130	PPP:19:21	8	8	2	5	3	23	9	11	2	4	19	2	4	1	12	5	4	2	0	6	3	9	19	0.146154	21	0.161538	5	2
C19orf70	0	0	118	NA	13	5	1	3	1	5	9	8	0	5	9	8	5	3	9	10	3	3	7	11	0	9	NA	NA	NA	NA	5	2
C19orf71	0	0	209	NA	20	21	6	7	5	11	11	9	4	4	15	3	3	2	26	18	14	11	14	5	0	26	NA	NA	NA	NA	20	3
C19orf73	3	2	129	PPP:47:49 PPP:125:127	12	18	0	2	4	2	4	14	2	0	15	3	2	3	21	9	7	2	0	9	6	15	47	0.364341	127	0.984496	9	3
C19orf75	0	0	197	NA	17	7	4	3	5	11	10	14	3	11	27	17	8	4	11	21	8	3	1	12	0	11	NA	NA	NA	NA	11	0
C19orf76	0	0	153	NA	16	13	0	3	6	4	8	15	7	8	22	0	2	5	18	8	7	3	2	6	0	18	NA	NA	NA	NA	16	1
C19orf77	0	0	130	NA	11	7	3	5	1	22	4	6	2	1	19	15	3	4	3	6	6	2	2	8	0	3	NA	NA	NA	NA	3	0
C19orf79	0	0	73	NA	3	8	2	3	0	11	5	1	0	5	7	6	3	5	3	2	1	3	1	4	0	3	NA	NA	NA	NA	1	1
C19orf80	0	0	198	NA	26	18	2	4	1	18	19	13	7	4	32	4	5	2	7	7	11	3	3	12	0	7	NA	NA	NA	NA	7	0
C1D	0	0	180	NA	16	9	9	6	1	19	5	9	2	6	13	17	7	3	8	19	7	3	6	15	0	8	NA	NA	NA	NA	8	0
C1GALT1	0	0	363	NA	19	14	19	24	8	24	13	21	14	13	36	28	8	17	17	21	17	8	23	19	0	17	NA	NA	NA	NA	15	1
C1GALT1C1	0	0	318	NA	18	10	17	18	7	21	7	20	13	18	28	25	17	18	11	22	11	5	12	20	0	11	NA	NA	NA	NA	9	1
C1orf100	0	0	147	NA	8	16	4	6	3	9	8	3	5	10	15	8	1	6	15	8	7	2	10	3	0	15	NA	NA	NA	NA	11	2
C1orf101	0	0	951	NA	44	42	43	44	19	50	27	48	29	69	90	49	17	60	43	70	68	20	53	66	0	43	NA	NA	NA	NA	41	1
C1orf105	0	0	183	NA	7	14	6	7	4	10	10	3	5	7	20	16	8	7	18	16	13	1	4	7	0	18	NA	NA	NA	NA	18	0
C1orf106	3	2	663	PPP:248:250 PPP:284:286	56	69	4	21	10	56	33	49	16	12	67	23	5	9	84	71	25	14	9	30	6	78	248	0.374057	286	0.431373	62	8
C1orf109	0	0	203	NA	17	14	4	16	2	14	18	5	4	9	32	11	3	6	8	14	2	4	4	16	0	8	NA	NA	NA	NA	8	0
C1orf110	0	0	302	NA	20	21	10	13	7	22	25	16	9	7	25	31	8	10	21	28	11	1	4	13	0	21	NA	NA	NA	NA	15	3
C1orf111	0	0	261	NA	21	15	8	13	12	15	15	13	5	13	21	14	5	10	17	34	10	4	10	6	0	17	NA	NA	NA	NA	13	2
C1orf112	0	0	853	NA	61	22	21	33	25	59	59	22	30	45	134	45	21	46	34	69	51	10	16	50	0	34	NA	NA	NA	NA	28	3
C1orf114	0	0	509	NA	19	40	32	32	6	71	35	12	10	21	43	52	11	16	20	40	21	4	7	17	0	20	NA	NA	NA	NA	14	3
[truncated: 16,667 more rows]
