# Supplementary material for: Proline: The Distribution, Frequency, Positioning, and Common Functional Roles of Proline and Polyproline Sequences in the Human Proteome
Source: PLoS One. 2013 Jan 25;8(1):e53785. doi: 10.1371/journal.pone.0053785 (PMC3556072; doi:10.1371/journal.pone.0053785)
Supplement: Table S3 — Enrichment of Functional Annotations for Proline-Rich Proteins. This table shows the functional and sequence annotations derived from DAVID for the proline-rich genes (top 1% of proline content in the proteome). The polyproline rich genes are similar in functional enrichment. (XLS) [file pone.0053785.s007.xls]

## Sheet: HighProlinePercentageDAVIDEnric
Category	Term	Count	%	PValue	Genes	List Total	Pop Hits	Pop Total	Fold Enrichment	Bonferroni	Benjamini	FDR
UP_SEQ_FEATURE	compositionally biased region:Pro-rich	71	40.8046	3.30822e-46	PRR18, PRR14, PRR13, ZNF580, PRR12, C22ORF26, KPRP, SOBP, VPS37C, CITED4, SYNPO2L, WBP2, PRR19, MAMSTR, PROL1, FAM109A, ZYX, NPIPL3, C6ORF132, C17ORF96, SSBP3, MBD6, SF1, HES7, MAPK1IP1L, DMRTB1, KIAA1522, PRR20A, FMN2, C16ORF11, PRR20E, PRR20D, PRAM1, PRR20C, PRR20B, CPSF6, PYGO2, WASL, SMR3A, SMR3B, C17ORF72, WBP11, CBLL1, CIC, FBRS, DAZAP1, C2ORF53, PRR4, HOXA3, PRR3, SHISA4, SHISA5, LMTK3, BC…	170	960	19113	8.31509	1.66735e-43	1.66735e-43	4.76932e-43
GOTERM_CC_FAT	GO:0005581~collagen	21	12.069	5.77603e-35	COL4A4, COL18A1, COL4A3, COL4A2, COL4A1, COL13A1, COL3A1, COL2A1, COL5A3, COL16A1, COL5A2, COL5A1, COL4A5, COL9A1, COL9A2, COL9A3, COL1A2, COL1A1, COL8A1, COL11A2, COL10A1	94	35	12782	81.5872	6.29587e-33	6.29587e-33	6.51491e-32
INTERPRO	IPR008160:Collagen triple helix repeat	25	14.3678	1.85142e-32	COL3A1, COL2A1, COL9A1, COL9A2, COL9A3, EMID1, COL8A1, COL11A2, COL8A2, COL10A1, COL4A4, COL18A1, COL4A3, COL4A2, COL4A1, COL23A1, COL13A1, COL25A1, COL5A3, COL16A1, COL5A2, COL5A1, COL4A5, COL1A2, COL1A1	122	84	16659	40.6396	2.33278e-30	2.33278e-30	2.14406e-29
SP_PIR_KEYWORDS	collagen	25	14.3678	9.34019e-29	COL3A1, COL2A1, COL9A1, COL9A2, COL9A3, EMID1, COL8A1, COL11A2, COL8A2, COL10A1, COL4A4, COL18A1, COL4A3, COL4A2, COL4A1, COL23A1, COL13A1, COL25A1, COL5A3, COL16A1, COL5A2, COL5A1, COL4A5, COL1A2, COL1A1	170	95	19235	29.7755	1.40103e-26	1.40103e-26	1.11537e-25
GOTERM_CC_FAT	GO:0044420~extracellular matrix part	24	13.7931	2.92531e-27	COL4A4, COL18A1, COL4A3, COL4A2, COL4A1, COL13A1, COL3A1, COL2A1, COL5A3, COL16A1, COL5A2, COL5A1, COL4A5, COL9A1, COL9A2, COL9A3, AMELX, AMELY, COL1A2, COL1A1, COL11A2, COL8A1, COL8A2, COL10A1	94	117	12782	27.8931	3.18858e-25	1.59429e-25	3.29952e-24
SP_PIR_KEYWORDS	hydroxylation	22	12.6437	6.78647e-27	COL4A4, COL18A1, COL4A3, COL4A2, COL4A1, COL3A1, COL25A1, COL2A1, COL5A3, COL16A1, COL5A2, COL5A1, COL4A5, COL9A1, COL9A2, COL9A3, COL1A2, COL1A1, COL11A2, COL8A1, COL8A2, COL10A1	170	71	19235	35.0597	1.01797e-24	5.08985e-25	8.10417e-24
SP_PIR_KEYWORDS	triple helix	17	9.77011	1.62547e-25	COL4A4, COL4A3, COL4A2, COL4A1, COL13A1, COL3A1, COL2A1, COL16A1, COL5A2, COL5A1, COL4A5, COL9A1, COL9A2, COL1A2, COL1A1, COL11A2, COL10A1	170	31	19235	62.0484	2.4382e-23	8.12734e-24	1.94108e-22
SP_PIR_KEYWORDS	hydroxylysine	17	9.77011	1.62547e-25	COL4A4, COL4A3, COL4A2, COL4A1, COL13A1, COL3A1, COL2A1, COL16A1, COL5A2, COL5A1, COL4A5, COL9A1, COL9A2, COL1A2, COL1A1, COL11A2, COL10A1	170	31	19235	62.0484	2.4382e-23	8.12734e-24	1.94108e-22
GOTERM_MF_FAT	GO:0005201~extracellular matrix structural constituent	21	12.069	5.59872e-25	COL4A4, COL18A1, COL4A3, COL4A2, COL4A1, COL13A1, COL3A1, COL2A1, COL5A3, COL5A2, COL5A1, COL4A5, COL9A1, COL9A2, COL9A3, AMELX, AMELY, COL1A2, COL1A1, COL11A2, COL8A2	99	86	12983	32.0229	7.05439e-23	7.05439e-23	6.48369e-22
INTERPRO	IPR003267:Small proline-rich	15	8.62069	2.17298e-24	LCE2C, SPRR2G, LCE2B, LELP1, SPRR2F, LCE2A, SPRR2E, SPRR2D, SPRR1A, SPRR2A, SPRR1B, SPRR2B, SPRR3, LCE2D, SPRR4	122	25	16659	81.9295	2.73796e-22	1.36898e-22	2.51645e-21
SP_PIR_KEYWORDS	hydroxyproline	17	9.77011	6.63747e-24	COL4A4, COL4A3, COL4A2, COL4A1, COL13A1, COL3A1, COL2A1, COL16A1, COL5A2, COL5A1, COL4A5, COL9A1, COL9A2, COL1A2, COL1A1, COL11A2, COL10A1	170	37	19235	51.9865	9.95621e-22	2.48905e-22	7.92625e-21
REACTOME_PATHWAY	REACT_18266:Axon guidance	14	8.04598	5.28746e-21	COL4A4, COL4A3, COL4A2, COL4A1, COL3A1, COL2A1, COL5A2, COL5A1, COL4A5, COL9A1, COL9A2, COL9A3, COL1A2, COL1A1	20	49	3398	48.5429	6.34495e-20	6.34495e-20	3.40178e-18
UP_SEQ_FEATURE	region of interest:Triple-helical region	13	7.47126	1.89744e-19	COL4A4, COL4A3, COL4A2, COL4A1, COL3A1, COL2A1, COL5A3, COL5A1, COL4A5, COL1A1, COL11A2, COL8A2, COL10A1	170	23	19113	63.5471	9.56308e-17	4.78154e-17	2.73545e-16
REACTOME_PATHWAY	REACT_16888:Signaling by PDGF	14	8.04598	2.5748e-19	COL4A4, COL4A3, COL4A2, COL4A1, COL3A1, COL2A1, COL5A2, COL5A1, COL4A5, COL9A1, COL9A2, COL9A3, COL1A2, COL1A1	20	64	3398	37.1656	3.08976e-18	1.54488e-18	1.65654e-16
GOTERM_BP_FAT	GO:0008544~epidermis development	22	12.6437	5.60257e-19	COL3A1, LCE2C, FOXN1, SPRR2G, LCE2B, SPRR2F, LCE2A, SPRR2E, COL5A3, WAS, COL5A2, COL5A1, SPRR2D, SPRR1A, SPRR1B, SPRR2A, SPRR2B, COL1A2, SPRR3, SPRR4, LCE2D, COL1A1	107	184	13528	15.1166	3.52402e-16	3.52402e-16	8.32802e-16
SP_PIR_KEYWORDS	extracellular matrix	25	14.3678	1.13745e-18	COL3A1, COL2A1, COL9A1, COL9A2, COL9A3, AMELX, AMELY, EMID1, COL8A1, COL11A2, COL8A2, COL10A1, COL4A4, COL18A1, COL4A3, COL4A2, COL4A1, COL13A1, COL5A3, COL16A1, COL5A2, COL5A1, COL4A5, COL1A2, COL1A1	170	241	19235	11.7372	1.70617e-16	3.41234e-17	1.3583e-15
SP_PIR_KEYWORDS	trimer	13	7.47126	1.22583e-18	COL4A4, COL4A3, COL4A1, COL13A1, COL3A1, COL2A1, COL16A1, COL5A2, COL5A1, COL4A5, COL1A2, COL1A1, COL11A2	170	26	19235	56.5735	1.83874e-16	3.06457e-17	1.46384e-15
GOTERM_BP_FAT	GO:0007398~ectoderm development	22	12.6437	2.89564e-18	COL3A1, LCE2C, FOXN1, SPRR2G, LCE2B, SPRR2F, LCE2A, SPRR2E, COL5A3, WAS, COL5A2, COL5A1, SPRR2D, SPRR1A, SPRR1B, SPRR2A, SPRR2B, COL1A2, SPRR3, SPRR4, LCE2D, COL1A1	107	199	13528	13.9772	1.82135e-15	9.10677e-16	4.30426e-15
GOTERM_CC_FAT	GO:0005578~proteinaceous extracellular matrix	25	14.3678	3.32964e-18	COL3A1, COL2A1, COL9A1, COL9A2, COL9A3, AMELX, AMELY, EMID1, COL8A1, COL11A2, COL8A2, COL10A1, COL4A4, COL18A1, COL4A3, COL4A2, COL4A1, COL13A1, COL5A3, COL16A1, COL5A2, COL5A1, COL4A5, COL1A2, COL1A1	94	320	12782	10.6233	3.62931e-16	1.20977e-16	3.75558e-15
GOTERM_BP_FAT	GO:0031424~keratinization	14	8.04598	5.82983e-18	LCE2C, SPRR2G, LCE2B, SPRR2F, LCE2A, SPRR2E, SPRR2D, SPRR1A, SPRR2A, SPRR1B, SPRR2B, SPRR3, LCE2D, SPRR4	107	43	13528	41.1632	3.66696e-15	1.22232e-15	8.66583e-15
PANTHER_PATHWAY	P00034:Integrin signalling pathway	22	12.6437	1.12042e-17	COL4A4, COL18A1, COL4A3, COL4A2, COL4A1, COL13A1, COL3A1, COL2A1, COL5A3, COL16A1, COL5A2, COL5A1, COL4A5, COL9A1, COL9A2, COL9A3, COL1A2, COL1A1, COL11A2, COL8A1, COL8A2, COL10A1	31	219	2857	9.25821	1.3445e-16	1.3445e-16	7.20841e-15
SP_PIR_KEYWORDS	keratinization	14	8.04598	1.12274e-17	LCE2C, SPRR2G, LCE2B, SPRR2F, LCE2A, SPRR2E, SPRR2D, SPRR1A, SPRR2A, SPRR1B, SPRR2B, SPRR3, LCE2D, SPRR4	170	40	19235	39.6015	1.68411e-15	2.40587e-16	1.34073e-14
GOTERM_CC_FAT	GO:0031012~extracellular matrix	25	14.3678	1.88197e-17	COL3A1, COL2A1, COL9A1, COL9A2, COL9A3, AMELX, AMELY, EMID1, COL8A1, COL11A2, COL8A2, COL10A1, COL4A4, COL18A1, COL4A3, COL4A2, COL4A1, COL13A1, COL5A3, COL16A1, COL5A2, COL5A1, COL4A5, COL1A2, COL1A1	94	345	12782	9.85353	2.05134e-15	5.12836e-16	2.12271e-14
GOTERM_BP_FAT	GO:0030216~keratinocyte differentiation	15	8.62069	7.31872e-17	LCE2C, FOXN1, SPRR2G, LCE2B, SPRR2F, LCE2A, SPRR2E, SPRR2D, SPRR1A, SPRR2A, SPRR1B, SPRR2B, SPRR3, LCE2D, SPRR4	107	66	13528	28.7341	6.9833e-14	1.74305e-14	1.66533e-13
GOTERM_BP_FAT	GO:0009913~epidermal cell differentiation	15	8.62069	2.7112e-16	LCE2C, FOXN1, SPRR2G, LCE2B, SPRR2F, LCE2A, SPRR2E, SPRR2D, SPRR1A, SPRR2A, SPRR1B, SPRR2B, SPRR3, LCE2D, SPRR4	107	72	13528	26.3396	1.39666e-13	2.79776e-14	3.33067e-13
GOTERM_BP_FAT	GO:0060429~epithelium development	20	11.4943	1.08308e-14	COL18A1, LCE2C, FOXN1, SPRR2G, LCE2B, SPRR2F, LCE2A, SPRR2E, PDX1, PSPN, HOXB4, SPRR1A, SPRR2D, SPRR1B, SPRR2A, SPRR2B, ZIC5, SPRR3, SPRR4, LCE2D	107	227	13528	11.1392	6.84364e-12	1.14064e-12	1.61759e-11
GOTERM_BP_FAT	GO:0030855~epithelial cell differentiation	16	9.1954	1.6436e-13	COL18A1, LCE2C, FOXN1, SPRR2G, LCE2B, SPRR2F, LCE2A, SPRR2E, SPRR2D, SPRR1A, SPRR1B, SPRR2A, SPRR2B, SPRR3, LCE2D, SPRR4	107	137	13528	14.7655	1.03353e-10	1.47647e-11	2.44249e-10
INTERPRO	IPR000885:Fibrillar collagen, C-terminal	8	4.5977	2.8829e-13	COL3A1, COL1A2, COL2A1, COL1A1, COL5A3, COL11A2, COL5A2, COL5A1	122	11	16659	99.3085	3.63289e-11	1.21096e-11	3.339e-10
GOTERM_CC_FAT	GO:0005583~fibrillar collagen	8	4.5977	6.59713e-13	COL3A1, COL1A2, COL2A1, COL1A1, COL5A3, COL11A2, COL5A2, COL5A1	94	12	12782	90.6525	7.19067e-11	1.43814e-11	7.44083e-10
GOTERM_MF_FAT	GO:0005198~structural molecule activity	27	15.5172	6.72107e-13	COL3A1, COL2A1, SPRR2E, COL9A1, COL9A2, COL9A3, AMELX, AMELY, COL11A2, COL8A2, COL4A4, COL18A1, COL4A3, COL4A2, COL4A1, MOBP, COL13A1, COL5A3, COL16A1, COL5A2, COL5A1, COL4A5, SPRR1A, SPRR1B, COL1A2, SPRR3, COL1A1	99	634	12983	5.58489	8.46883e-11	4.23441e-11	7.78366e-10
UP_SEQ_FEATURE	domain:Fibrillar collagen NC1	8	4.5977	1.19479e-12	COL3A1, COL1A2, COL2A1, COL1A1, COL5A3, COL11A2, COL5A2, COL5A1	170	11	19113	81.7668	6.0219e-10	2.0073e-10	1.72252e-09
SMART	SM00038:COLFI	8	4.5977	1.21071e-12	COL3A1, COL1A2, COL2A1, COL1A1, COL5A3, COL11A2, COL5A2, COL5A1	83	11	9079	79.5531	5.44814e-11	5.44814e-11	1.13858e-09
KEGG_PATHWAY	hsa04512:ECM-receptor interaction	11	6.32184	3.75173e-12	COL4A4, COL4A2, COL4A1, COL3A1, COL1A2, COL2A1, COL1A1, COL5A3, COL11A2, COL5A2, COL5A1	27	84	5085	24.6627	6.7532e-11	6.7532e-11	2.76552e-09
GOTERM_CC_FAT	GO:0044421~extracellular region part	30	17.2414	1.5966e-11	PRH1, PRH2, COL3A1, COL2A1, COL9A1, COL9A2, COL9A3, PRR4, AMELX, EMID1, AMELY, COL11A2, COL8A1, COL8A2, COL10A1, COL4A4, COL18A1, COL4A3, COL4A2, COL4A1, COL13A1, COL25A1, COL5A3, COL16A1, COL5A2, COL5A1, COL4A5, PSPN, COL1A2, COL1A1, SMR3B	94	960	12782	4.24934	1.74029e-09	2.90049e-10	1.80084e-08
PIR_SUPERFAMILY	PIRSF003543:human herpesvirus 4 BHLF1 protein	6	3.44828	2.75981e-11	COL9A2, COL9A3, COL13A1, COL25A1, GGN, COL4A5	43	6	7396	172	6.62356e-10	6.62356e-10	2.21389e-08
UP_SEQ_FEATURE	repeat:3	17	9.77011	7.82528e-11	PRB2, PRB3, PRB1, MOBP, PRG4, PRB4, SPRR2G, MUC7, SPRR2F, SPRR2E, ESX1, CDKN1C, SPRR2D, SPRR1A, SPRR1B, SPRR2A, PRAM1, SPRR2B, SPRR3	170	214	19113	8.93131	3.94394e-08	9.85986e-09	1.12814e-07
PIR_SUPERFAMILY	PIRSF002258:collagen alpha 1(IV) chain	6	3.44828	9.61906e-11	COL4A4, COL4A3, COL4A2, COL4A1, COL16A1, COL4A5	43	7	7396	147.429	2.30857e-09	1.15429e-09	7.71628e-08
GOTERM_CC_FAT	GO:0001533~cornified envelope	8	4.5977	1.33914e-10	SPRR2D, SPRR1A, SPRR1B, SPRR2A, SPRR2B, SPRR2G, SPRR2F, SPRR2E	94	22	12782	49.4468	1.45966e-08	2.08523e-09	1.51044e-07
GOTERM_CC_FAT	GO:0030935~sheet-forming collagen	6	3.44828	3.79761e-10	COL4A4, COL4A3, COL4A2, COL4A1, COL8A1, COL4A5	94	7	12782	116.553	4.13939e-08	5.17424e-09	4.28341e-07
UP_SEQ_FEATURE	repeat:1	17	9.77011	5.14116e-10	PRB2, PRB3, PRB1, MOBP, PRG4, PRB4, SPRR2G, MUC7, SPRR2F, SPRR2E, ESX1, CDKN1C, SPRR2D, SPRR1A, SPRR1B, SPRR2A, PRAM1, SPRR2B, SPRR3	170	243	19113	7.86543	2.59114e-07	5.18229e-08	7.41177e-07
UP_SEQ_FEATURE	compositionally biased region:Poly-Pro	21	12.069	7.51631e-10	GLTSCR1, RAX, WASF1, WASF2, CYYR1, C21ORF119, PDX1, SF3B4, WAS, ATF5, HOXB4, ATN1, PRRT1, WIPF2, WIPF3, WIPF1, BRD4, KLF2, SMR3A, BCL9, SMR3B	170	413	19113	5.71675	3.78822e-07	6.3137e-08	1.08359e-06
GOTERM_CC_FAT	GO:0005576~extracellular region	40	22.9885	1.24184e-09	PRH1, PRH2, COL3A1, COL2A1, COL9A1, COL9A2, COL9A3, PRR4, AMELX, PROL1, EMID1, AMELY, COL11A2, COL8A1, COL8A2, COL10A1, PRB2, COL18A1, COL4A4, PRB3, COL4A3, COL4A2, PRB1, COL4A1, PRG4, COL13A1, PRB4, C4ORF40, MUC7, COL25A1, COL16A1, COL5A3, COL5A2, COL5A1, COL4A5, PSPN, PSORS1C2, COL1A2, COL1A1, SMR3A, CSN2, SMR3B, C4ORF7	94	2010	12782	2.70604	1.35361e-07	1.50401e-08	1.4007e-06
KEGG_PATHWAY	hsa04510:Focal adhesion	12	6.89655	1.28896e-09	COL4A4, COL4A2, COL4A1, COL3A1, COL1A2, COL2A1, ZYX, COL1A1, COL5A3, COL11A2, COL5A2, COL5A1	27	201	5085	11.2438	2.32013e-08	1.16006e-08	9.50123e-07
GOTERM_BP_FAT	GO:0030199~collagen fibril organization	8	4.5977	2.0104e-09	COL3A1, COL1A2, COL2A1, COL1A1, COL5A3, COL11A2, COL5A2, COL5A1	107	29	13528	34.8772	1.26454e-06	1.58068e-07	2.98839e-06
UP_SEQ_FEATURE	propeptide:C-terminal propeptide	6	3.44828	2.79206e-09	COL3A1, COL1A2, COL1A1, COL11A2, COL5A2, COL5A1	170	8	19113	84.3221	1.4072e-06	2.01028e-07	4.02519e-06
PIR_SUPERFAMILY	PIRSF002255:collagen alpha 1(I) chain	5	2.87356	4.47407e-09	COL3A1, COL1A2, COL2A1, COL1A1, COL5A2	43	5	7396	172	1.07378e-07	3.57926e-08	3.58904e-06
GOTERM_CC_FAT	GO:0005604~basement membrane	10	5.74713	4.65256e-09	COL4A4, COL18A1, COL4A3, COL4A2, COL4A1, COL2A1, COL8A1, COL8A2, COL5A1, COL4A5	94	78	12782	17.4332	5.07129e-07	5.07129e-08	5.24772e-06
UP_SEQ_FEATURE	repeat:2	16	9.1954	5.23059e-09	PRB2, PRB3, PRB1, MOBP, PRB4, SPRR2G, MUC7, SPRR2F, SPRR2E, ESX1, CDKN1C, SPRR2D, SPRR1A, SPRR1B, SPRR2A, PRAM1, SPRR2B, SPRR3	170	246	19113	7.31248	2.63621e-06	3.29527e-07	7.5407e-06
SP_PIR_KEYWORDS	pyroglutamic acid	9	5.17241	5.90594e-09	PRB2, COL9A1, PRB1, PRB4, COL3A1, COL1A2, COL2A1, COL1A1, COL5A2, COL5A1, SMR3B	170	46	19235	22.1375	8.85891e-07	1.10736e-07	7.05267e-06
INTERPRO	IPR003124:Actin-binding WH2	7	4.02299	6.43271e-09	WASF1, WASF2, WIPF2, WIPF3, WASL, WIPF1, WAS	122	21	16659	45.5164	8.10521e-07	2.0263e-07	7.4495e-06
GOTERM_BP_FAT	GO:0030198~extracellular matrix organization	11	6.32184	8.01914e-09	COL18A1, COL4A2, COL3A1, COL1A2, COL2A1, COL1A1, COL5A3, COL11A2, COL5A2, COL8A2, COL5A1	107	104	13528	13.3724	5.04403e-06	5.60449e-07	1.19202e-05
GOTERM_MF_FAT	GO:0048407~platelet-derived growth factor binding	6	3.44828	9.85414e-09	COL4A1, COL3A1, COL1A2, COL2A1, COL1A1, COL5A1	99	11	12983	71.5317	1.24162e-06	4.13874e-07	1.14117e-05
SMART	SM00246:WH2	7	4.02299	2.19624e-08	WASF1, WASF2, WIPF2, WIPF3, WASL, WIPF1, WAS	83	21	9079	36.4618	9.88307e-07	4.94154e-07	2.06542e-05
GOTERM_CC_FAT	GO:0005587~collagen type IV	5	2.87356	3.89584e-08	COL4A4, COL4A3, COL4A2, COL4A1, COL4A5	94	6	12782	113.316	4.24646e-06	3.86043e-07	4.39421e-05
INTERPRO	IPR001442:Type 4 procollagen, C-terminal repeat	5	2.87356	3.92783e-08	COL4A4, COL4A3, COL4A2, COL4A1, COL4A5	122	6	16659	113.791	4.94906e-06	9.89813e-07	4.54868e-05
GOTERM_MF_FAT	GO:0030020~extracellular matrix structural constituent conferring tensile strength	5	2.87356	4.52624e-08	COL9A1, COL9A2, COL9A3, COL2A1, COL11A2	99	6	12983	109.285	5.70305e-06	1.42576e-06	5.24168e-05
UP_SEQ_FEATURE	region of interest:Nonhelical region 2 (NC2)	5	2.87356	8.72796e-08	COL18A1, COL9A2, COL9A3, COL13A1, COL16A1	170	6	19113	93.6912	4.39879e-05	4.88764e-06	0.000125827
UP_SEQ_FEATURE	region of interest:Nonhelical region 1 (NC1)	5	2.87356	8.72796e-08	COL18A1, COL9A2, COL9A3, COL13A1, COL16A1	170	6	19113	93.6912	4.39879e-05	4.88764e-06	0.000125827
UP_SEQ_FEATURE	region of interest:Nonhelical region 3 (NC3)	5	2.87356	8.72796e-08	COL18A1, COL9A2, COL9A3, COL13A1, COL16A1	170	6	19113	93.6912	4.39879e-05	4.88764e-06	0.000125827
UP_SEQ_FEATURE	domain:Collagen IV NC1	5	2.87356	8.72796e-08	COL4A4, COL4A3, COL4A2, COL4A1, COL4A5	170	6	19113	93.6912	4.39879e-05	4.88764e-06	0.000125827
SMART	SM00111:C4	5	2.87356	9.14639e-08	COL4A4, COL4A3, COL4A2, COL4A1, COL4A5	83	6	9079	91.1546	4.11587e-06	1.37196e-06	8.60157e-05
REACTOME_PATHWAY	REACT_13552:Integrin cell surface interactions	8	4.5977	1.34792e-07	COL4A4, COL4A3, COL4A2, COL4A1, COL1A2, COL2A1, COL1A1, COL4A5	20	81	3398	16.7802	1.61751e-06	5.3917e-07	8.67211e-05
SP_PIR_KEYWORDS	Secreted	38	21.8391	1.54894e-07	PRH1, PRH2, COL3A1, COL2A1, COL9A1, COL9A2, COL9A3, PRR4, AMELX, PROL1, EMID1, AMELY, COL11A2, COL8A1, COL8A2, COL10A1, PRB2, COL4A4, COL18A1, PRB3, COL4A3, COL4A2, PRB1, COL4A1, PRG4, PRB4, C4ORF40, MUC7, COL5A3, COL16A1, COL5A2, COL5A1, COL4A5, PSPN, PSORS1C2, COL1A2, COL1A1, SMR3A, CSN2, SMR3B, C4ORF7	170	1689	19235	2.54564	2.32338e-05	2.58156e-06	0.000184969
UP_SEQ_FEATURE	region of interest:Nonhelical region (NC2)	5	2.87356	2.02246e-07	COL9A1, COL8A1, COL8A2, COL4A5, COL10A1	170	7	19113	80.3067	0.000101927	1.01932e-05	0.000291569
UP_SEQ_FEATURE	region of interest:Triple-helical region 3 (COL3)	5	2.87356	2.02246e-07	COL18A1, COL9A2, COL9A3, COL13A1, COL16A1	170	7	19113	80.3067	0.000101927	1.01932e-05	0.000291569
UP_SEQ_FEATURE	domain:WH2	6	3.44828	3.97631e-07	WASF1, WASF2, WIPF2, WIPF3, WIPF1, WAS	170	18	19113	37.4765	0.000200386	1.82186e-05	0.000573246
GOTERM_BP_FAT	GO:0043062~extracellular structure organization	11	6.32184	5.76936e-07	COL18A1, COL4A2, COL3A1, COL1A2, COL2A1, COL1A1, COL5A3, COL11A2, COL5A2, COL8A2, COL5A1	107	163	13528	8.53208	0.000362827	3.62887e-05	0.000857591
SP_PIR_KEYWORDS	basement membrane	7	4.02299	1.07987e-06	COL4A4, COL4A3, COL4A2, COL4A1, COL8A1, COL8A2, COL4A5	170	39	19235	20.3084	0.000161968	1.6198e-05	0.00128954
GOTERM_BP_FAT	GO:0001501~skeletal system development	14	8.04598	1.21266e-06	COL13A1, COL3A1, COL2A1, HES7, COL5A2, COL9A1, HOXB4, COL9A2, HOXA3, AMELX, COL1A2, COL1A1, COL11A2, COL10A1	107	319	13528	5.54865	0.000762471	6.93396e-05	0.00180256
INTERPRO	IPR003302:Cornifin (SPRR)	4	2.29885	1.48727e-06	SPRR1A, SPRR1B, SPRR3, SPRR4	122	4	16659	136.549	0.000187379	3.12323e-05	0.00172235
UP_SEQ_FEATURE	domain:TSP N-terminal	6	3.44828	1.50669e-06	COL18A1, COL9A1, COL5A3, COL16A1, COL11A2, COL5A1	170	23	19113	29.3294	0.000759086	6.32791e-05	0.00217211
SP_PIR_KEYWORDS	Ehlers-Danlos syndrome	5	2.87356	1.80875e-06	COL3A1, COL1A2, COL1A1, COL5A2, COL5A1	170	11	19235	51.4305	0.000271276	2.46645e-05	0.00215992
GOTERM_BP_FAT	GO:0043588~skin development	6	3.44828	2.74653e-06	COL3A1, COL1A2, COL1A1, COL5A3, COL5A2, COL5A1	107	29	13528	26.1579	0.00172608	0.000143954	0.00408253
GENETIC_ASSOCIATION_DB_DISEASE	disc degeneration	4	2.29885	6.25254e-06	COL9A2, COL9A3, COL2A1, COL11A2	28	5	3028	86.5143	0.000656303	0.000656303	0.0070034
UP_SEQ_FEATURE	region of interest:Nonhelical region 4 (NC4)	4	2.29885	6.70375e-06	COL18A1, COL9A2, COL13A1, COL16A1	170	5	19113	89.9435	0.003373	0.000259866	0.00966406
GOTERM_CC_FAT	GO:0005593~FACIT collagen	4	2.29885	7.3409e-06	COL9A1, COL9A2, COL9A3, COL16A1	94	6	12782	90.6525	0.000799841	6.66779e-05	0.00827965
UP_SEQ_FEATURE	repeat:5	10	5.74713	1.10727e-05	PRB2, CDKN1C, PRB3, PRB1, PRG4, SPRR1A, PRB4, PRAM1, SPRR1B, SPRR3, MUC7, ESX1	170	157	19113	7.16111	0.00556513	0.00039854	0.0159618
GOTERM_MF_FAT	GO:0030528~transcription regulator activity	28	16.092	1.28732e-05	MEF2B, CDX1, PDX1, CITED4, CRX, ZNF207, HOXA3, ATN1, LYL1, SOX18, COL11A2, TPRX1, UTF1, SSBP3, RAX, SF1, FOXN1, HES7, ESX1, MYPOP, DMRTB1, CDKN1C, HOXB4, ATF5, DMRTC2, MNT, KLF2, FOXE3	99	1512	12983	2.42854	0.00162072	0.000324354	0.014907
UP_SEQ_FEATURE	region of interest:Triple-helical region 1 (COL1)	4	2.29885	1.33202e-05	COL18A1, COL9A2, COL9A3, COL13A1	170	6	19113	74.9529	0.00669095	0.000447462	0.0192014
UP_SEQ_FEATURE	region of interest:Triple-helical region 2 (COL2)	4	2.29885	1.33202e-05	COL18A1, COL9A2, COL9A3, COL13A1	170	6	19113	74.9529	0.00669095	0.000447462	0.0192014
UP_SEQ_FEATURE	propeptide:N-terminal propeptide	4	2.29885	1.33202e-05	COL3A1, COL1A2, COL2A1, COL1A1	170	6	19113	74.9529	0.00669095	0.000447462	0.0192014
INTERPRO	IPR003129:Laminin G, thrombospondin-type, N-terminal	5	2.87356	1.75059e-05	COL9A1, COL5A3, COL16A1, COL11A2, COL5A1	122	22	16659	31.0339	0.00220333	0.000315059	0.0202711
UP_SEQ_FEATURE	region of interest:Nonhelical region (NC1)	4	2.29885	2.31587e-05	COL9A1, COL8A1, COL8A2, COL10A1	170	7	19113	64.2454	0.0116043	0.000729242	0.0333817
GOTERM_CC_FAT	GO:0030934~anchoring collagen	4	2.29885	3.03464e-05	COL9A1, COL9A2, COL9A3, COL16A1	94	9	12782	60.435	0.00330234	0.000254414	0.034223
UP_SEQ_FEATURE	repeat:4	10	5.74713	3.56559e-05	PRB2, CDKN1C, PRB3, PRB1, MOBP, SPRR1A, PRB4, PRAM1, SPRR1B, SPRR3, MUC7, ESX1	170	182	19113	6.17744	0.0178104	0.00105655	0.0513912
SMART	SM00210:TSPN	5	2.87356	3.99502e-05	COL9A1, COL5A3, COL16A1, COL11A2, COL5A1	83	22	9079	24.8604	0.00179618	0.000449348	0.0375643
UP_SEQ_FEATURE	repeat:6	9	5.17241	4.08706e-05	PRB2, CDKN1C, PRB3, PRB1, SPRR1A, PRB4, PRAM1, SPRR1B, SPRR3, MUC7, ESX1	170	143	19113	7.07598	0.0203885	0.00114374	0.0589051
GENETIC_ASSOCIATION_DB_DISEASE	osteoarthritis	6	3.44828	8.17686e-05	COL9A1, COL9A2, COL9A3, COL2A1, COL1A1, COL11A2	28	53	3028	12.2426	0.0085493	0.00428382	0.0915528
PIR_SUPERFAMILY	PIRSF002261:collagen alpha 1(VIII) chain	3	1.72414	9.41131e-05	COL8A1, COL8A2, COL10A1	43	3	7396	172	0.00225627	0.000564546	0.0754713
PIR_SUPERFAMILY	PIRSF002569:proline-rich peptide P-B	3	1.72414	9.41131e-05	PRB2, PRB3, PRB1, PRB4, SMR3B	43	3	7396	172	0.00225627	0.000564546	0.0754713
UP_SEQ_FEATURE	short sequence motif:Cell attachment site	7	4.02299	0.000130171	COL4A4, COL18A1, COL4A3, COL9A3, COL1A1, COL16A1, COL5A2	170	88	19113	8.94325	0.0635046	0.00344724	0.187498
GOTERM_CC_FAT	GO:0005588~collagen type V	3	1.72414	0.000156373	COL5A3, COL5A2, COL5A1	94	3	12782	135.979	0.0169015	0.00121683	0.176235
GOTERM_CC_FAT	GO:0005594~collagen type IX	3	1.72414	0.000156373	COL9A1, COL9A2, COL9A3	94	3	12782	135.979	0.0169015	0.00121683	0.176235
PIR_SUPERFAMILY	PIRSF002257:collagen alpha 1(V) chain	3	1.72414	0.000187548	COL5A3, COL11A2, COL5A1	43	4	7396	129	0.00449145	0.000899908	0.150349
UP_SEQ_FEATURE	region of interest:3 X 9 AA tandem repeats of P-K-C-P-[EQ]- P-C-P-P	3	1.72414	0.000231817	SPRR2A, SPRR2B, SPRR2E	170	3	19113	112.429	0.110281	0.00582543	0.333681
UP_SEQ_FEATURE	site:Cleavage; by collagenase	3	1.72414	0.000231817	COL4A4, COL4A3, COL1A1	170	3	19113	112.429	0.110281	0.00582543	0.333681
OMIM_DISEASE	Ehlers-Danlos syndrome, type I	3	1.72414	0.000248388	COL1A1, COL5A2, COL5A1	35	3	3671	104.886	0.0235661	0.0235661	0.273234
SP_PIR_KEYWORDS	cell binding	4	2.29885	0.000280506	COL4A3, COL4A2, COL4A1, COL16A1	170	15	19235	30.1725	0.0412086	0.00350067	0.334457
GOTERM_BP_FAT	GO:0051216~cartilage development	6	3.44828	0.000281752	COL9A1, HOXA3, AMELX, COL2A1, COL1A1, COL11A2	107	74	13528	10.2511	0.162427	0.0135419	0.417997
GOTERM_MF_FAT	GO:0003700~transcription factor activity	19	10.9195	0.000324578	TPRX1, MEF2B, CDX1, RAX, FOXN1, PDX1, ESX1, MYPOP, DMRTB1, ZNF207, CRX, ATF5, HOXB4, HOXA3, DMRTC2, MNT, SOX18, KLF2, FOXE3	99	975	12983	2.55558	0.0400782	0.00679407	0.375238
SP_PIR_KEYWORDS	dwarfism	5	2.87356	0.000336241	COL9A2, COL9A3, COL1A2, COL2A1, COL1A1	170	38	19235	14.8878	0.0491934	0.00387284	0.40079
GOTERM_BP_FAT	GO:0002062~chondrocyte differentiation	4	2.29885	0.000350256	COL9A1, AMELX, COL2A1, COL11A2	107	18	13528	28.0955	0.197761	0.015616	0.51938
GOTERM_BP_FAT	GO:0007155~cell adhesion	16	9.1954	0.000353042	COL18A1, COL4A3, COL13A1, COL3A1, EFS, COL2A1, CBLL1, COL5A3, COL16A1, COL5A1, COL9A1, AMELX, ZYX, COL8A1, COL11A2, COL8A2	107	700	13528	2.88983	0.199167	0.0146978	0.523502
GOTERM_BP_FAT	GO:0022610~biological adhesion	16	9.1954	0.000358428	COL18A1, COL4A3, COL13A1, COL3A1, EFS, COL2A1, CBLL1, COL5A3, COL16A1, COL5A1, COL9A1, AMELX, ZYX, COL8A1, COL11A2, COL8A2	107	701	13528	2.8857	0.201876	0.0139944	0.531467
GOTERM_BP_FAT	GO:0008154~actin polymerization or depolymerization	4	2.29885	0.000413565	WASF1, WASL, WIPF1, WAS	107	19	13528	26.6168	0.229092	0.0151885	0.612989
GOTERM_BP_FAT	GO:0007423~sensory organ development	9	5.17241	0.000433093	RAX, SOBP, PYGO2, COL2A1, COL8A1, COL5A2, COL8A2, COL5A1, FOXE3	107	229	13528	4.96886	0.238507	0.0150235	0.641848
SP_PIR_KEYWORDS	stickler syndrome	3	1.72414	0.00045514	COL9A1, COL2A1, COL11A2	170	4	19235	84.8603	0.0660071	0.00486573	0.542161
UP_SEQ_FEATURE	region of interest:Nonhelical region (C-terminal)	3	1.72414	0.000460934	COL3A1, COL2A1, COL1A1	170	4	19113	84.3221	0.207343	0.011004	0.662458
UP_SEQ_FEATURE	domain:VWFC	4	2.29885	0.000502601	COL3A1, COL2A1, COL1A1, COL5A2	170	18	19113	24.9843	0.223823	0.011451	0.72214
GOTERM_BP_FAT	GO:0001654~eye development	7	4.02299	0.000591732	RAX, PYGO2, COL8A1, COL5A2, COL8A2, COL5A1, FOXE3	107	132	13528	6.70462	0.310859	0.0194045	0.875989
GOTERM_BP_FAT	GO:0032964~collagen biosynthetic process	3	1.72414	0.000598919	COL3A1, COL1A1, COL5A1	107	5	13528	75.8579	0.313969	0.0186653	0.886585
GOTERM_CC_FAT	GO:0030532~small nuclear ribonucleoprotein complex	4	2.29885	0.000675569	SNRPN, SNRPB, SNRPC, SF3A2, SNURF	94	24	12782	22.6631	0.0710142	0.00489875	0.759348
GOTERM_BP_FAT	GO:0001568~blood vessel development	9	5.17241	0.000676301	COL18A1, HOXA3, WASF2, COL3A1, COL1A2, SOX18, COL1A1, ESX1, COL5A1	107	245	13528	4.64436	0.346581	0.0200597	1.0006
UP_SEQ_FEATURE	repeat:8	7	4.02299	0.000695657	PRB2, CDKN1C, PRB3, PRB1, PRG4, PRB4, PRAM1, SPRR3, ESX1	170	120	19113	6.55838	0.295828	0.0151336	0.998231
GOTERM_MF_FAT	GO:0003677~DNA binding	32	18.3908	0.000711686	MEF2B, CDX1, NACA, PRR12, ZNF580, WBP11, PDX1, CIC, ZNF207, CRX, HOXA3, LYL1, SOX18, BRD4, TPRX1, SSBP3, RAX, CHTF8, MBD6, FOXN1, HES7, ESX1, MYPOP, DMRTB1, HOXB4, ATF5, DMRTC2, ZIC5, MNT, ZNF414, KLF2, FOXE3	99	2331	12983	1.80031	0.0857985	0.0127331	0.821082
SP_PIR_KEYWORDS	skin	3	1.72414	0.000754181	COL3A1, COL1A2, COL1A1	170	5	19235	67.8882	0.107001	0.00751627	0.896911
GOTERM_BP_FAT	GO:0001944~vasculature development	9	5.17241	0.000791925	COL18A1, HOXA3, WASF2, COL3A1, COL1A2, SOX18, COL1A1, ESX1, COL5A1	107	251	13528	4.53334	0.392448	0.0223962	1.17073
UP_TISSUE	Saliva	5	2.87356	0.000972041	PRB2, PRB3, PRH1, PRB1, PRH2, PRB4, MUC7, SMR3B	152	53	18201	11.2965	0.0970734	0.0970734	1.08342
UP_SEQ_FEATURE	repeat:7	7	4.02299	0.00101503	PRB2, CDKN1C, PRB3, PRB1, PRG4, PRB4, PRAM1, SPRR3, ESX1	170	129	19113	6.10082	0.400606	0.0211007	1.45341
GNF_U133A_QUARTILE	Trigeminal Ganglion_3rd	23	13.2184	0.00109327	PRH1, PRH2, COL3A1, COL2A1, COL9A2, COL9A3, PRR4, PROL1, COL11A2, COL8A2, COL10A1, PRB2, PRB3, PRB1, PRB4, EFS, MUC7, COL5A2, COL5A1, SPRR1A, SPRR1B, COL1A2, SPRR3, COL1A1, SMR3A, SMR3B	105	1377	13036	2.07371	0.0817829	0.0817829	1.1504
GOTERM_MF_FAT	GO:0019838~growth factor binding	6	3.44828	0.00117688	COL4A1, COL3A1, COL1A2, COL2A1, COL1A1, COL5A1	99	105	12983	7.4938	0.137892	0.0183759	1.35446
GOTERM_BP_FAT	GO:0006350~transcription	30	17.2414	0.00124812	MEF2B, NACA, ZNF580, PDX1, CIC, CITED4, CRX, MAMSTR, HOXA3, LYL1, BCL9L, SOX18, UTF1, CCNK, SSBP3, RAX, SF1, FOXN1, HES7, ESX1, MYPOP, DMRTB1, HOXB4, ATF5, DMRTC2, MNT, ZNF414, WASL, KLF2, FOXE3	107	2101	13528	1.80528	0.544136	0.0335781	1.83932
INTERPRO	IPR017970:Homeobox, conserved site	8	4.5977	0.00152886	TPRX1, HOXB4, CDX1, RAX, HOXA3, PDX1, ESX1, CRX	122	232	16659	4.70859	0.175339	0.0238099	1.75627
UP_SEQ_FEATURE	DNA-binding region:Homeobox	8	4.5977	0.0015326	TPRX1, HOXB4, CDX1, RAX, HOXA3, PDX1, ESX1, CRX	170	190	19113	4.73387	0.538384	0.0304477	2.1869
GENETIC_ASSOCIATION_DB_DISEASE	multiple epiphyseal dysplasia	3	1.72414	0.00156461	COL9A1, COL9A2, COL9A3	28	7	3028	46.3469	0.151608	0.0533295	1.73864
INTERPRO	IPR001356:Homeobox	8	4.5977	0.00164517	TPRX1, HOXB4, CDX1, RAX, HOXA3, PDX1, ESX1, CRX	122	235	16659	4.64848	0.187356	0.0227877	1.88872
INTERPRO	IPR012287:Homeodomain-related	8	4.5977	0.00176827	TPRX1, HOXB4, CDX1, RAX, HOXA3, PDX1, ESX1, CRX	122	238	16659	4.58989	0.199885	0.0220531	2.02872
GOTERM_BP_FAT	GO:0048705~skeletal system morphogenesis	6	3.44828	0.0018558	HOXB4, HOXA3, COL13A1, COL2A1, COL1A1, COL11A2	107	112	13528	6.77303	0.68913	0.0475166	2.72337
GENETIC_ASSOCIATION_DB_DISEASE	disc degeneration, intervertebral	3	1.72414	0.00207468	COL9A2, COL9A3, COL11A2	28	8	3028	40.5536	0.195929	0.0530575	2.29946
SP_PIR_KEYWORDS	Alport syndrome	3	1.72414	0.00207535	COL4A4, COL4A3, COL4A5	170	8	19235	42.4301	0.267744	0.0192881	2.45036
UP_SEQ_FEATURE	region of interest:Nonhelical region	3	1.72414	0.00210146	COL5A3, COL11A2, COL5A1	170	8	19113	42.161	0.653631	0.0399586	2.98724
UP_SEQ_FEATURE	repeat:9	6	3.44828	0.00222003	PRB2, CDKN1C, PRB3, PRB1, PRG4, PRB4, SPRR3, ESX1	170	103	19113	6.54929	0.673766	0.0406379	3.15329
GOTERM_BP_FAT	GO:0045449~regulation of transcription	34	19.5402	0.00222618	MEF2B, CDX1, ZNF580, PDX1, CIC, CITED4, CRX, ZNF207, MAMSTR, HOXA3, ATN1, LYL1, BCL9L, SOX18, TPRX1, UTF1, CCNK, SSBP3, RAX, SF1, FOXN1, HES7, ESX1, MYPOP, DMRTB1, CDKN1C, HOXB4, ATF5, DMRTC2, MNT, WASL, ZNF414, KLF2, FOXE3	107	2601	13528	1.65268	0.753853	0.05453	3.25855
GOTERM_BP_FAT	GO:0050673~epithelial cell proliferation	3	1.72414	0.00262697	FOXN1, COL8A1, COL8A2	107	10	13528	37.929	0.808819	0.0616535	3.83457
UP_SEQ_FEATURE	glycosylation site:O-linked (Gal...)	3	1.72414	0.0026862	COL3A1, COL2A1, COL1A1	170	9	19113	37.4765	0.742225	0.0472633	3.80356
GOTERM_BP_FAT	GO:0060348~bone development	6	3.44828	0.00279345	HOXB4, COL13A1, AMELX, COL2A1, COL1A1, COL5A2	107	123	13528	6.16731	0.827876	0.06309	4.0729
INTERPRO	IPR001007:von Willebrand factor, type C	4	2.29885	0.00303584	COL3A1, COL2A1, COL1A1, COL5A2	122	40	16659	13.6549	0.318254	0.0342276	3.45978
SP_PIR_KEYWORDS	signal	44	25.2874	0.00303869	PRH1, PRH2, COL3A1, COL2A1, C12ORF53, COL9A1, COL9A2, COL9A3, PRR4, AMELX, PROL1, EMID1, SHISA4, AMELY, SHISA5, LMTK3, COL11A2, COL8A1, COL8A2, COL10A1, PRB2, COL18A1, COL4A4, PRB3, COL4A3, COL4A2, PRB1, COL4A1, PRG4, PRB4, C4ORF40, CYYR1, TMEM52, MUC7, COL16A1, COL5A3, COL5A2, COL5A1, COL4A5, PSPN, PSORS1C2, COL1A2, COL1A1, SMR3A, CSN2, SMR3B, C4ORF7	170	3250	19235	1.53184	0.366501	0.0264955	3.56898
UP_SEQ_FEATURE	signal peptide	44	25.2874	0.00342652	PRH1, PRH2, COL3A1, COL2A1, C12ORF53, COL9A1, COL9A2, COL9A3, PRR4, AMELX, PROL1, EMID1, SHISA4, AMELY, SHISA5, LMTK3, COL11A2, COL8A1, COL8A2, COL10A1, PRB2, COL18A1, COL4A4, PRB3, COL4A3, COL4A2, PRB1, COL4A1, PRG4, PRB4, C4ORF40, CYYR1, TMEM52, MUC7, COL16A1, COL5A3, COL5A2, COL5A1, COL4A5, PSPN, PSORS1C2, COL1A2, COL1A1, SMR3A, CSN2, SMR3B, C4ORF7	170	3250	19113	1.52212	0.822703	0.0579084	4.8279
KEGG_PATHWAY	hsa03040:Spliceosome	5	2.87356	0.00352061	SNRPB, WBP11, SNRPC, SF3A2, SF3B4	27	126	5085	7.47354	0.0615097	0.0209386	2.5662
GOTERM_BP_FAT	GO:0001958~endochondral ossification	3	1.72414	0.00381368	COL13A1, COL2A1, COL1A1	107	12	13528	31.6075	0.909589	0.0822548	5.52145
SMART	SM00389:HOX	8	4.5977	0.00521044	TPRX1, HOXB4, CDX1, RAX, HOXA3, PDX1, ESX1, CRX	83	235	9079	3.72376	0.209495	0.0459284	4.79416
SMART	SM00214:VWC	4	2.29885	0.00551587	COL3A1, COL2A1, COL1A1, COL5A2	83	40	9079	10.9386	0.220343	0.0406349	5.0687
GOTERM_MF_FAT	GO:0030674~protein binding, bridging	5	2.87356	0.00554271	SPRR1A, SPRR1B, COL1A2, COL11A2, COL8A2	99	94	12983	6.97561	0.503576	0.0748634	6.2339
SP_PIR_KEYWORDS	Homeobox	8	4.5977	0.00563744	TPRX1, HOXB4, CDX1, RAX, HOXA3, PDX1, ESX1, CRX	170	242	19235	3.7404	0.571733	0.0460191	6.52824
SP_PIR_KEYWORDS	transcription regulation	30	17.2414	0.00565445	MEF2B, CDX1, ZNF580, PDX1, CIC, CITED4, CRX, MAMSTR, HOXA3, LYL1, BCL9L, SOX18, UTF1, CCNK, SSBP3, RAX, SF1, FOXN1, HES7, ESX1, MYPOP, DMRTB1, HOXB4, ATF5, DMRTC2, MNT, ZNF414, WASL, KLF2, FOXE3	170	2026	19235	1.67543	0.57283	0.0437798	6.54733
GOTERM_MF_FAT	GO:0043565~sequence-specific DNA binding	12	6.89655	0.0059583	TPRX1, HOXB4, MEF2B, ATF5, CDX1, RAX, HOXA3, FOXN1, PDX1, ESX1, FOXE3, CRX	99	607	12983	2.59258	0.529044	0.0725339	6.68668
SP_PIR_KEYWORDS	dna-binding	28	16.092	0.00671096	MEF2B, CDX1, NACA, ZNF580, PDX1, CIC, CRX, ZNF207, HOXA3, LYL1, SOX18, TPRX1, SSBP3, RAX, CHTF8, FOXN1, HES7, ESX1, MYPOP, DMRTB1, HOXB4, ATF5, DMRTC2, ZIC5, MNT, ZNF414, KLF2, FOXE3	170	1868	19235	1.69599	0.635795	0.0492478	7.72622
KEGG_PATHWAY	hsa04520:Adherens junction	4	2.29885	0.00675707	WASF1, WASF2, WASL, WAS	27	77	5085	9.78355	0.114887	0.0300493	4.87487
GOTERM_BP_FAT	GO:0060350~endochondral bone morphogenesis	3	1.72414	0.00679384	COL13A1, COL2A1, COL1A1	107	16	13528	23.7056	0.986266	0.137447	9.63675
GOTERM_BP_FAT	GO:0034621~cellular macromolecular complex subunit organization	9	5.17241	0.00695963	WASF1, SF1, SNRPB, SPRR2G, WASL, SNRPC, WIPF1, SF3A2, WAS	107	357	13528	3.18731	0.987635	0.136214	9.86071
GOTERM_BP_FAT	GO:0007605~sensory perception of sound	5	2.87356	0.00706594	COL4A3, SOBP, COL2A1, COL1A1, COL11A2	107	97	13528	6.51701	0.988441	0.134008	10.004
INTERPRO	IPR000095:PAK-box/P21-Rho-binding	3	1.72414	0.00741909	WASL, WAS, CDC42EP5	122	18	16659	22.7582	0.608704	0.0752121	8.26244
SP_PIR_KEYWORDS	Transcription	30	17.2414	0.00763004	MEF2B, NACA, ZNF580, PDX1, CIC, CITED4, CRX, MAMSTR, HOXA3, LYL1, BCL9L, SOX18, UTF1, CCNK, SSBP3, RAX, SF1, FOXN1, HES7, ESX1, MYPOP, DMRTB1, HOXB4, ATF5, DMRTC2, MNT, ZNF414, WASL, KLF2, FOXE3	170	2071	19235	1.63902	0.683013	0.0532396	8.74065
GOTERM_BP_FAT	GO:0050954~sensory perception of mechanical stimulus	5	2.87356	0.00870128	COL4A3, SOBP, COL2A1, COL1A1, COL11A2	107	103	13528	6.13737	0.995901	0.157838	12.1823
UP_TISSUE	Eye	17	9.77011	0.00967466	COL4A4, SSBP3, COL4A2, RAX, PRR14, C15ORF39, MBD6, SF1, WBP11, MAPK1IP1L, COL5A1, CRX, FAM168B, C16ORF11, BRD4, ZNF414, C16ORF5	152	1009	18201	2.01748	0.639688	0.39974	10.3176
UP_SEQ_FEATURE	repeat:10	5	2.87356	0.00971164	PRB2, PRB3, PRB1, PRG4, PRB4, SPRR3, ESX1	170	94	19113	5.98029	0.992691	0.151218	13.1244
GOTERM_MF_FAT	GO:0016564~transcription repressor activity	8	4.5977	0.00991878	CDKN1C, HOXB4, ATF5, ATN1, SF1, MNT, HES7, ESX1	99	316	12983	3.32004	0.715211	0.107905	10.9025
GOTERM_MF_FAT	GO:0005178~integrin binding	4	2.29885	0.0099896	COL4A3, COL3A1, COL16A1, COL5A1	99	59	12983	8.89094	0.717766	0.100052	10.9763
GOTERM_MF_FAT	GO:0003702~RNA polymerase II transcription factor activity	7	4.02299	0.0103657	ATF5, UTF1, RAX, FOXN1, SF1, SOX18, PDX1	99	244	12983	3.76225	0.73096	0.0960597	11.3672
GOTERM_BP_FAT	GO:0060349~bone morphogenesis	3	1.72414	0.0105401	COL13A1, COL2A1, COL1A1	107	20	13528	18.9645	0.998725	0.182877	14.5728
SMART	SM00285:PBD	3	1.72414	0.0112258	WASL, WAS, CDC42EP5	83	18	9079	18.2309	0.398313	0.070003	10.0727
PIR_SUPERFAMILY	PIRSF037187:snRNP_SmB/SmN	2	1.14943	0.011326	SNRPN, SNRPB, SNURF	43	2	7396	172	0.239193	0.0445401	8.73238
PIR_SUPERFAMILY	PIRSF037187:small nuclear ribonucleoprotein associated protein, SmB/SmN types	2	1.14943	0.011326	SNRPN, SNRPB, SNURF	43	2	7396	172	0.239193	0.0445401	8.73238
PIR_SUPERFAMILY	PIRSF002573:amelogenin	2	1.14943	0.011326	AMELX, AMELY	43	2	7396	172	0.239193	0.0445401	8.73238
PIR_SUPERFAMILY	PIRSF037537:Wasp protein, metazoan type	2	1.14943	0.011326	WASL, WAS	43	2	7396	172	0.239193	0.0445401	8.73238
GOTERM_MF_FAT	GO:0003779~actin binding	8	4.5977	0.0116355	FMN2, WASF1, WASF2, WIPF2, WIPF3, WASL, WIPF1, SYNPO2L	99	326	12983	3.21819	0.771147	0.099976	12.6753
KEGG_PATHWAY	hsa04666:Fc gamma R-mediated phagocytosis	4	2.29885	0.0120317	WASF1, WASF2, WASL, WAS	27	95	5085	7.92982	0.195782	0.0426411	8.53617
UP_SEQ_FEATURE	domain:CRIB	3	1.72414	0.012041	WASL, WAS, CDC42EP5	170	19	19113	17.752	0.997769	0.178769	16.0243
GOTERM_BP_FAT	GO:0001503~ossification	5	2.87356	0.0126732	COL13A1, AMELX, COL2A1, COL1A1, COL5A2	107	115	13528	5.49695	0.999672	0.210182	17.2699
UP_SEQ_FEATURE	compositionally biased region:Poly-His	4	2.29885	0.0127293	ATN1, PRRT1, BRD4, C21ORF58	170	55	19113	8.17668	0.99843	0.18272	16.8638
INTERPRO	IPR001827:Homeobox protein, antennapedia type, conserved site	3	1.72414	0.0130094	HOXB4, HOXA3, PDX1	122	24	16659	17.0686	0.807939	0.119195	14.0708
GOTERM_BP_FAT	GO:0048729~tissue morphogenesis	6	3.44828	0.0135814	HOXB4, PSPN, ZIC5, COL1A2, COL1A1, PDX1	107	180	13528	4.21433	0.999816	0.217883	18.3939
GOTERM_CC_FAT	GO:0015629~actin cytoskeleton	7	4.02299	0.0136349	FMN2, WASF1, WASF2, ZYX, WASL, WIPF1, WAS	94	269	12782	3.53848	0.776071	0.0892864	14.3455
GOTERM_BP_FAT	GO:0030048~actin filament-based movement	3	1.72414	0.0138226	WASF2, WIPF1, WAS	107	23	13528	16.4909	0.999842	0.215883	18.69
INTERPRO	IPR015668:B Cell Lymphoma 9	2	1.14943	0.0144744	BCL9L, BCL9	122	2	16659	136.549	0.840721	0.122976	15.5362
INTERPRO	IPR017131:Small ribonucleoprotein associated, SmB/SmN	2	1.14943	0.0144744	SNRPN, SNRPB, SNURF	122	2	16659	136.549	0.840721	0.122976	15.5362
INTERPRO	IPR004116:Amelogenin	2	1.14943	0.0144744	AMELX, AMELY	122	2	16659	136.549	0.840721	0.122976	15.5362
GOTERM_CC_FAT	GO:0005584~collagen type I	2	1.14943	0.0144993	COL1A2, COL1A1	94	2	12782	135.979	0.796481	0.0893958	15.1884
UP_TISSUE	Bone	4	2.29885	0.0148154	SF1, COL1A1, COL5A2, CDC42EP5	152	62	18201	7.72538	0.791383	0.406915	15.3963
GOTERM_BP_FAT	GO:0034505~tooth mineralization	2	1.14943	0.0156104	AMELX, COL1A1	107	2	13528	126.43	0.99995	0.234686	20.8537
GOTERM_CC_FAT	GO:0005681~spliceosome	5	2.87356	0.0156511	SNRPN, SF1, SNRPB, SF3A2, SF3B4, SNURF	94	132	12782	5.15071	0.820837	0.0911047	16.2997
UP_TISSUE	Tooth bud	2	1.14943	0.0165241	AMELX, AMELY	152	2	18201	119.743	0.826144	0.354275	17.0255
GOTERM_BP_FAT	GO:0048592~eye morphogenesis	4	2.29885	0.0168586	COL8A1, COL5A2, COL8A2, COL5A1	107	69	13528	7.32927	0.999977	0.245299	22.3325
GOTERM_BP_FAT	GO:0022618~ribonucleoprotein complex assembly	4	2.29885	0.0168586	SF1, SNRPB, SNRPC, SF3A2	107	69	13528	7.32927	0.999977	0.245299	22.3325
PIR_SUPERFAMILY	PIRSF038481:Wiskott-Aldrich syndrome proteins	2	1.14943	0.016942	WASF1, WASF2	43	3	7396	114.667	0.33641	0.0569013	12.8091
GNF_U133A_QUARTILE	Thyroid_3rd	31	17.8161	0.0170783	CDX1, NACA, PRH1, PRH2, PRR14, PRR13, COL3A1, SF3B4, DAZAP1, ZNF207, PRR4, PRR3, WIPF2, WIPF1, BRD4, BCL9, PRB2, PRB3, COL4A1, PRB1, PRB4, C17ORF62, SF1, MUC7, MAPK1IP1L, SF3A2, WAS, COL5A1, RNF44, SPRR1A, SNRPB, CPSF6, COL1A1, SMR3B	105	2584	13036	1.48944	0.739098	0.489214	16.6574
UP_SEQ_FEATURE	short sequence motif:Antp-type hexapeptide	3	1.72414	0.0174088	HOXB4, HOXA3, PDX1	170	23	19113	14.6647	0.999857	0.235262	22.3676
GOTERM_BP_FAT	GO:0018149~peptide cross-linking	3	1.72414	0.0174882	SPRR1A, SPRR1B, COL3A1	107	26	13528	14.5881	0.999985	0.247646	23.0686
SP_PIR_KEYWORDS	tooth	2	1.14943	0.0174954	AMELX, AMELY	170	2	19235	113.147	0.929175	0.113383	19.0042
SP_PIR_KEYWORDS	enamel	2	1.14943	0.0174954	AMELX, AMELY	170	2	19235	113.147	0.929175	0.113383	19.0042
UP_SEQ_FEATURE	region of interest:6 X 8 AA approximate tandem repeats	2	1.14943	0.0176066	SPRR1A, SPRR1B	170	2	19113	112.429	0.999871	0.231501	22.5925
UP_SEQ_FEATURE	site:Cleavage; by procollagen C-endopeptidase	2	1.14943	0.0176066	COL2A1, COL1A1	170	2	19113	112.429	0.999871	0.231501	22.5925
UP_SEQ_FEATURE	region of interest:Triple-helical region (COL1)	2	1.14943	0.0176066	COL9A1, COL8A1	170	2	19113	112.429	0.999871	0.231501	22.5925
UP_SEQ_FEATURE	region of interest:2 X 12 AA approximate repeats	2	1.14943	0.0176066	SPRR1A, SPRR1B	170	2	19113	112.429	0.999871	0.231501	22.5925
UP_SEQ_FEATURE	propeptide:N-terminal propeptide (7S domain)	2	1.14943	0.0176066	COL4A2, COL4A1	170	2	19113	112.429	0.999871	0.231501	22.5925
UP_SEQ_FEATURE	region of interest:Nonhelical region (N-terminal)	2	1.14943	0.0176066	COL3A1, COL1A1	170	2	19113	112.429	0.999871	0.231501	22.5925
UP_SEQ_FEATURE	site:Cleavage; by procollagen N-endopeptidase	2	1.14943	0.0176066	COL2A1, COL1A1	170	2	19113	112.429	0.999871	0.231501	22.5925
UP_SEQ_FEATURE	cross-link:S-Lysyl-methionine sulfilimine (Met-Lys) (interchain with K-1651)	2	1.14943	0.0176066	COL4A3, COL4A1	170	2	19113	112.429	0.999871	0.231501	22.5925
UP_SEQ_FEATURE	cross-link:S-Lysyl-methionine sulfilimine (Lys-Met) (interchain with M-1533)	2	1.14943	0.0176066	COL4A3, COL4A1	170	2	19113	112.429	0.999871	0.231501	22.5925
GENETIC_ASSOCIATION_DB_DISEASE	sciatica	2	1.14943	0.017757	COL9A2, COL9A3	28	2	3028	108.143	0.847598	0.313567	18.1832
GENETIC_ASSOCIATION_DB_DISEASE	otosclerosis	2	1.14943	0.017757	COL1A2, COL1A1	28	2	3028	108.143	0.847598	0.313567	18.1832
GENETIC_ASSOCIATION_DB_DISEASE	intervertebral disc disease	2	1.14943	0.017757	COL9A2, COL9A3	28	2	3028	108.143	0.847598	0.313567	18.1832
GENETIC_ASSOCIATION_DB_DISEASE	hearing loss/deafness; osteogenesis imperfecta	2	1.14943	0.017757	COL1A2, COL1A1	28	2	3028	108.143	0.847598	0.313567	18.1832
GENETIC_ASSOCIATION_DB_DISEASE	disc degeneration, lumbar spine	2	1.14943	0.017757	COL9A2, COL9A3	28	2	3028	108.143	0.847598	0.313567	18.1832
SMART	SM00818:Amelogenin	2	1.14943	0.0179831	AMELX, AMELY	83	2	9079	109.386	0.55807	0.0970385	15.689
OMIM_DISEASE	Intervertebral disc disease, susceptibility to	2	1.14943	0.0184403	COL9A2, COL9A3	35	2	3671	104.886	0.832503	0.590737	18.535
OMIM_DISEASE	Otospondylomegaepiphyseal dysplasia	2	1.14943	0.0184403	COL2A1, COL11A2	35	2	3671	104.886	0.832503	0.590737	18.535
OMIM_DISEASE	Alport syndrome, autosomal recessive	2	1.14943	0.0184403	COL4A4, COL4A3	35	2	3671	104.886	0.832503	0.590737	18.535
GOTERM_BP_FAT	GO:0007015~actin filament organization	4	2.29885	0.0188707	WASF1, WASL, WIPF1, WAS	107	72	13528	7.02388	0.999994	0.258869	24.6621
UP_TISSUE	Cartilage	3	1.72414	0.0195059	COL9A2, COL9A3, COL11A2	152	26	18201	13.8165	0.873607	0.338782	19.8002
GOTERM_BP_FAT	GO:0032963~collagen metabolic process	3	1.72414	0.0201352	COL3A1, COL1A1, COL5A1	107	28	13528	13.5461	0.999997	0.268059	26.0925
SP_PIR_KEYWORDS	angiogenesis	4	2.29885	0.0203584	COL4A2, COL4A1, COL8A1, COL8A2	170	66	19235	6.8574	0.954283	0.125535	21.7783
GOTERM_CC_FAT	GO:0005856~cytoskeleton	18	10.3448	0.0205829	WASF1, WASF2, SPRR2G, SPRR2F, SPRR2E, WAS, SYNPO2L, FMN2, SPRR2D, SPRR1A, SPRR1B, SPRR2A, SPRR2B, WIPF2, WASL, ZYX, WIPF1, CDC42EP5	94	1381	12782	1.77235	0.896371	0.11247	20.9098
SP_PIR_KEYWORDS	Pyrrolidone carboxylic acid	4	2.29885	0.0211784	PRH1, PRH2, COL1A2, COL1A1, SMR3B	170	67	19235	6.75505	0.959679	0.125223	22.5565
UP_TISSUE	Keratinocyte	5	2.87356	0.0220015	SPRR2D, SPRR1A, SPRR1B, SPRR3, SPRR2E	152	128	18201	4.67748	0.903282	0.322486	22.0573
SP_PIR_KEYWORDS	actin-binding	7	4.02299	0.0221232	WASF1, WASF2, WIPF2, WIPF3, WASL, WIPF1, SYNPO2L	170	247	19235	3.2066	0.965116	0.125611	23.4445
GOTERM_BP_FAT	GO:0048706~embryonic skeletal system development	4	2.29885	0.0225077	HOXB4, HOXA3, COL2A1, COL1A1	107	77	13528	6.56779	0.999999	0.288892	28.7084
INTERPRO	IPR001073:Complement C1q protein	3	1.72414	0.0225155	COL8A1, COL8A2, COL10A1	122	32	16659	12.8015	0.943266	0.174108	23.1815
GOTERM_BP_FAT	GO:0008380~RNA splicing	7	4.02299	0.0241822	SNRPN, SF1, SNRPB, WBP11, SNRPC, SF3A2, SF3B4, SNURF	107	284	13528	3.11623	1	0.300985	30.5024
GOTERM_BP_FAT	GO:0044259~multicellular organismal macromolecule metabolic process	3	1.72414	0.0243966	COL3A1, COL1A1, COL5A1	107	31	13528	12.2352	1	0.297483	30.729
BIOCARTA	h_salmonellaPathway:How does salmonella hijack a cell	2	1.14943	0.0248349	WASF1, WASL	7	6	1437	68.4286	0.161415	0.161415	12.1597
SP_PIR_KEYWORDS	heterotrimer	3	1.72414	0.0249773	COL9A1, COL9A2, COL4A2	170	28	19235	12.1229	0.977499	0.135782	26.0705
GOTERM_BP_FAT	GO:0060021~palate development	3	1.72414	0.025892	PYGO2, COL2A1, COL11A2	107	32	13528	11.8528	1	0.306969	32.2906
SP_PIR_KEYWORDS	splicing protein	2	1.14943	0.0261286	SNRPN, SNRPB, SNURF	170	3	19235	75.4314	0.981153	0.136783	27.1063
UP_SEQ_FEATURE	region of interest:Nonhelical region 6 (NC6)	2	1.14943	0.026294	COL18A1, COL16A1	170	3	19113	74.9529	0.999999	0.318664	31.8964
UP_SEQ_FEATURE	region of interest:Nonhelical region 8 (NC8)	2	1.14943	0.026294	COL18A1, COL16A1	170	3	19113	74.9529	0.999999	0.318664	31.8964
UP_SEQ_FEATURE	region of interest:Binds actin	2	1.14943	0.026294	WIPF2, WIPF1	170	3	19113	74.9529	0.999999	0.318664	31.8964
UP_SEQ_FEATURE	region of interest:Nonhelical region 9 (NC9)	2	1.14943	0.026294	COL18A1, COL16A1	170	3	19113	74.9529	0.999999	0.318664	31.8964
UP_SEQ_FEATURE	region of interest:7S domain	2	1.14943	0.026294	COL4A4, COL4A3	170	3	19113	74.9529	0.999999	0.318664	31.8964
UP_SEQ_FEATURE	region of interest:Nonhelical region 10 (NC10)	2	1.14943	0.026294	COL18A1, COL16A1	170	3	19113	74.9529	0.999999	0.318664	31.8964
UP_SEQ_FEATURE	region of interest:Nonhelical region 5 (NC5)	2	1.14943	0.026294	COL18A1, COL16A1	170	3	19113	74.9529	0.999999	0.318664	31.8964
UP_SEQ_FEATURE	region of interest:Nonhelical region 7 (NC7)	2	1.14943	0.026294	COL18A1, COL16A1	170	3	19113	74.9529	0.999999	0.318664	31.8964
GENETIC_ASSOCIATION_DB_DISEASE	lumbar disc disease	2	1.14943	0.0265212	COL9A2, COL1A1	28	3	3028	72.0952	0.940532	0.375239	25.9982
SP_PIR_KEYWORDS	viral nucleoprotein	3	1.72414	0.026675	SNRPN, SNRPB, SNRPC, SNURF	170	29	19235	11.7049	0.982675	0.134841	27.5931
GOTERM_BP_FAT	GO:0006357~regulation of transcription from RNA polymerase II promoter	12	6.89655	0.0269386	CDKN1C, HOXB4, ATF5, UTF1, CDX1, ATN1, FOXN1, SOX18, HES7, PDX1, MYPOP, CRX	107	727	13528	2.08688	1	0.311616	33.3639
GOTERM_BP_FAT	GO:0007601~visual perception	6	3.44828	0.0274185	COL18A1, RAX, PRR4, COL2A1, COL1A1, CRX	107	216	13528	3.51194	1	0.310691	33.8509
GOTERM_BP_FAT	GO:0050953~sensory perception of light stimulus	6	3.44828	0.0274185	COL18A1, RAX, PRR4, COL2A1, COL1A1, CRX	107	216	13528	3.51194	1	0.310691	33.8509
UP_SEQ_FEATURE	repeat:14	4	2.29885	0.0278678	PRB2, PRB1, PRG4, PRB4, SPRR3, ESX1	170	74	19113	6.07727	0.999999	0.326784	33.4663
GNF_U133A_QUARTILE	Hypothalamus_3rd	34	19.5402	0.0283701	SPRR2G, VPS37C, PDX1, SYNPO2L, WBP2, PRR4, ATN1, PROL1, EMID1, AMELY, SPRR2B, BRD4, COL11A2, NPIPL3, COL8A2, BCL9, COL18A1, PRB3, COL4A3, COL4A2, CCNK, COL4A1, C15ORF39, PRG4, COL13A1, SF3A2, COL5A1, SPRR1A, WASL, COL1A1, KLF2, SMR3A, CSN2, SMR3B	105	3024	13036	1.39589	0.894058	0.526824	26.2458
SP_PIR_KEYWORDS	tandem repeat	4	2.29885	0.0283824	PRB2, PRB1, AMELX, PRB4, AMELY, SF3A2	170	75	19235	6.03451	0.986686	0.13837	29.0955
GOTERM_MF_FAT	GO:0030247~polysaccharide binding	5	2.87356	0.0291454	COL13A1, PRG4, COL25A1, COL5A3, COL5A1	99	154	12983	4.25784	0.975933	0.219999	29.0035
GOTERM_MF_FAT	GO:0001871~pattern binding	5	2.87356	0.0291454	COL13A1, PRG4, COL25A1, COL5A3, COL5A1	99	154	12983	4.25784	0.975933	0.219999	29.0035
UP_SEQ_FEATURE	domain:C1q	3	1.72414	0.03056	COL8A1, COL8A2, COL10A1	170	31	19113	10.8803	1	0.344771	36.0739
GOTERM_BP_FAT	GO:0043589~skin morphogenesis	2	1.14943	0.0309793	COL1A2, COL1A1	107	4	13528	63.215	1	0.337927	37.3609
UP_SEQ_FEATURE	repeat:13	4	2.29885	0.0318866	PRB2, PRB1, PRG4, PRB4, SPRR3, ESX1	170	78	19113	5.76561	1	0.349365	37.3234
GOTERM_BP_FAT	GO:0000377~RNA splicing, via transesterification reactions with bulged adenosine as nucleophile	5	2.87356	0.0321773	SF1, SNRPB, SNRPC, SF3A2, SF3B4	107	153	13528	4.1317	1	0.34285	38.5021
GOTERM_BP_FAT	GO:0000375~RNA splicing, via transesterification reactions	5	2.87356	0.0321773	SF1, SNRPB, SNRPC, SF3A2, SF3B4	107	153	13528	4.1317	1	0.34285	38.5021
GOTERM_BP_FAT	GO:0000398~nuclear mRNA splicing, via spliceosome	5	2.87356	0.0321773	SF1, SNRPB, SNRPC, SF3A2, SF3B4	107	153	13528	4.1317	1	0.34285	38.5021
GOTERM_BP_FAT	GO:0030036~actin cytoskeleton organization	6	3.44828	0.0324319	FMN2, WASF1, WASF2, WASL, WIPF1, WAS	107	226	13528	3.35655	1	0.339499	38.7422
UP_TISSUE	Lacrimal gland	2	1.14943	0.032777	PRR4, PROL1	152	4	18201	59.8717	0.96978	0.393404	31.1538
GOTERM_BP_FAT	GO:0006355~regulation of transcription, DNA-dependent	22	12.6437	0.0332484	TPRX1, MEF2B, UTF1, CDX1, RAX, FOXN1, HES7, ESX1, PDX1, MYPOP, DMRTB1, CRX, ZNF207, CDKN1C, ATF5, HOXB4, HOXA3, ATN1, DMRTC2, MNT, SOX18, FOXE3	107	1773	13528	1.56879	1	0.341002	39.5061
SMART	SM00110:C1Q	3	1.72414	0.033552	COL8A1, COL8A2, COL10A1	83	32	9079	10.2549	0.784706	0.156874	27.454
GOTERM_BP_FAT	GO:0044236~multicellular organismal metabolic process	3	1.72414	0.0339011	COL3A1, COL1A1, COL5A1	107	37	13528	10.2511	1	0.341101	40.1104
GOTERM_BP_FAT	GO:0031214~biomineral formation	3	1.72414	0.0339011	AMELX, AMELY, COL1A1	107	37	13528	10.2511	1	0.341101	40.1104
UP_SEQ_FEATURE	repeat:12	4	2.29885	0.0340036	PRB2, PRB1, PRG4, PRB4, SPRR3, ESX1	170	80	19113	5.62147	1	0.360505	39.2706
UP_SEQ_FEATURE	region of interest:Triple-helical region 4 (COL4)	2	1.14943	0.034905	COL18A1, COL9A2	170	4	19113	56.2147	1	0.360879	40.0825
GOTERM_MF_FAT	GO:0016563~transcription activator activity	8	4.5977	0.0353753	CDKN1C, UTF1, MNT, PDX1, KLF2, COL11A2, CITED4, CRX	99	410	12983	2.55886	0.989306	0.246953	34.1039
UP_TISSUE	Ovarian carcinoma	5	2.87356	0.035658	C22ORF26, SNRPB, SF3A2, SF3B4, DAZAP1	152	149	18201	4.01824	0.977906	0.379084	33.4162
GNF_U133A_QUARTILE	Medulla Oblongata_3rd	38	21.8391	0.0370278	PRR14, PRR13, ZNF580, WASF2, COL3A1, VPS37C, WBP11, PRR4, ATN1, SPRR2B, WIPF2, ZYX, BRD4, PRB2, COL18A1, PRB3, COL4A3, COL4A2, PRB1, COL4A1, C15ORF39, COL13A1, PRB4, C17ORF62, SF1, EFS, MAPK1IP1L, SF3A2, COL5A2, WAS, COL5A1, CDKN1C, PSPN, COL1A2, SNRPB, MNT, WASL, SNRPC, COL1A1, KLF2	105	3545	13036	1.33083	0.947292	0.520853	32.9082
INTERPRO	IPR012680:Laminin G, subdomain 2	3	1.72414	0.037297	COL5A3, COL11A2, COL5A1	122	42	16659	9.75351	0.991682	0.258686	35.6082
GOTERM_BP_FAT	GO:0000389~nuclear mRNA 3'-splice site recognition	2	1.14943	0.0385744	SF1, SF3A2	107	5	13528	50.572	1	0.373033	44.2753
GOTERM_BP_FAT	GO:0034622~cellular macromolecular complex assembly	7	4.02299	0.0388634	WASF1, SF1, SNRPB, SPRR2G, SNRPC, SF3A2, WAS	107	318	13528	2.78305	1	0.3698	44.5238
GOTERM_BP_FAT	GO:0006397~mRNA processing	7	4.02299	0.0403819	SF1, SNRPB, CPSF6, WBP11, SNRPC, SF3A2, SF3B4	107	321	13528	2.75704	1	0.375876	45.8124
SP_PIR_KEYWORDS	activator	10	5.74713	0.0405293	MAMSTR, MEF2B, ATF5, UTF1, BCL9L, SOX18, PDX1, KLF2, CITED4, CRX	170	520	19235	2.1759	0.997983	0.186873	38.9861
GOTERM_BP_FAT	GO:0030029~actin filament-based process	6	3.44828	0.0409687	FMN2, WASF1, WASF2, WASL, WIPF1, WAS	107	241	13528	3.14763	1	0.374909	46.3029
GOTERM_BP_FAT	GO:0051252~regulation of RNA metabolic process	22	12.6437	0.0409941	TPRX1, MEF2B, UTF1, CDX1, RAX, FOXN1, HES7, ESX1, PDX1, MYPOP, DMRTB1, CRX, ZNF207, CDKN1C, ATF5, HOXB4, HOXA3, ATN1, DMRTC2, MNT, SOX18, FOXE3	107	1813	13528	1.53417	1	0.369919	46.324
INTERPRO	IPR001791:Laminin G	3	1.72414	0.0422893	COL5A3, COL11A2, COL5A1	122	45	16659	9.10328	0.99568	0.274039	39.3709
INTERPRO	IPR008983:Tumour necrosis factor-like	3	1.72414	0.0422893	COL8A1, COL8A2, COL10A1	122	45	16659	9.10328	0.99568	0.274039	39.3709
SP_PIR_KEYWORDS	developmental protein	13	7.47126	0.0424016	CDX1, RAX, COL13A1, FOXN1, HES7, PDX1, GGN, DAZAP1, HOXB4, FMN2, HOXA3, ZIC5, WIPF3	170	779	19235	1.88821	0.998495	0.189129	40.3928
GOTERM_MF_FAT	GO:0008201~heparin binding	4	2.29885	0.0429196	COL13A1, COL25A1, COL5A3, COL5A1	99	103	12983	5.09287	0.996023	0.277572	39.8313
UP_SEQ_FEATURE	region of interest:Repeat-rich region	2	1.14943	0.0434403	SNRPN, SNRPB, SNURF	170	5	19113	44.9718	1	0.420705	47.2849
GOTERM_MF_FAT	GO:0030345~structural constituent of tooth enamel	2	1.14943	0.0444523	AMELX, AMELY	99	6	12983	43.7138	0.996751	0.272611	40.9378
GOTERM_MF_FAT	GO:0030021~extracellular matrix structural constituent conferring compression resistance	2	1.14943	0.0444523	AMELX, AMELY	99	6	12983	43.7138	0.996751	0.272611	40.9378
GOTERM_BP_FAT	GO:0002009~morphogenesis of an epithelium	4	2.29885	0.0448754	HOXB4, PSPN, ZIC5, PDX1	107	101	13528	5.00713	1	0.392209	49.4641
BIOCARTA	h_actinYPathway:Y branching of actin filaments	2	1.14943	0.0451361	WASF2, WASL	7	11	1437	37.3247	0.276247	0.149263	21.1882
GOTERM_BP_FAT	GO:0043009~chordate embryonic development	7	4.02299	0.0457142	HOXB4, HOXA3, ZIC5, PYGO2, HES7, COL2A1, COL1A1	107	331	13528	2.67374	1	0.392772	50.1198
GOTERM_BP_FAT	GO:0060351~cartilage development involved in endochondral bone morphogenesis	2	1.14943	0.0461106	COL2A1, COL1A1	107	6	13528	42.1433	1	0.390363	50.4269
GOTERM_MF_FAT	GO:0046332~SMAD binding	3	1.72414	0.0470913	COL3A1, COL1A2, COL5A2	99	46	12983	8.5527	0.997707	0.273766	42.7995
GOTERM_BP_FAT	GO:0009792~embryonic development ending in birth or egg hatching	7	4.02299	0.0473959	HOXB4, HOXA3, ZIC5, PYGO2, HES7, COL2A1, COL1A1	107	334	13528	2.64973	1	0.393883	51.4106
INTERPRO	IPR001275:DM DNA-binding	2	1.14943	0.0497576	DMRTC2, DMRTB1	122	7	16659	39.0141	0.998389	0.300414	44.6257
GOTERM_BP_FAT	GO:0043010~camera-type eye development	4	2.29885	0.0517055	RAX, PYGO2, COL8A1, COL8A2	107	107	13528	4.72635	1	0.41644	54.5777
UP_SEQ_FEATURE	DNA-binding region:DM	2	1.14943	0.0519005	DMRTC2, DMRTB1	170	6	19113	37.4765	1	0.47247	53.6219
SP_PIR_KEYWORDS	nucleus	48	27.5862	0.0524129	MEF2B, CDX1, ZNF580, PDX1, CITED4, CRX, ZNF207, MAMSTR, SOX18, ZYX, BRD4, SSBP3, RAX, SNRPN, CHTF8, FOXN1, SF1, HES7, DMRTB1, SNRPB, MNT, PYGO2, CPSF6, SNRPC, WASL, NACA, WBP11, CIC, SF3B4, DAZAP1, HOXA3, LYL1, SHISA5, BCL9L, BCL9, TPRX1, UTF1, ESX1, SF3A2, MYPOP, SNURF, CDKN1C, ATF5, HOXB4, DMRTC2, ZIC5, ZNF414, KLF2, FOXE3	170	4283	19235	1.26805	0.999689	0.223033	47.4232
GOTERM_BP_FAT	GO:0022613~ribonucleoprotein complex biogenesis	5	2.87356	0.0529786	SF1, SNRPB, WBP11, SNRPC, SF3A2	107	180	13528	3.51194	1	0.419272	55.4757
GOTERM_BP_FAT	GO:0043206~fibril organization	2	1.14943	0.0535882	COL3A1, COL5A1	107	7	13528	36.1228	1	0.418014	55.8998
GOTERM_BP_FAT	GO:0051258~protein polymerization	3	1.72414	0.0563666	WASF1, SPRR2G, WAS	107	49	13528	7.74061	1	0.429608	57.7856
GOTERM_MF_FAT	GO:0003712~transcription cofactor activity	7	4.02299	0.0566407	ATF5, UTF1, ATN1, SF1, MNT, COL11A2, CITED4	99	363	12983	2.5289	0.999355	0.307427	49.0969
UP_TISSUE	Submandibular gland	2	1.14943	0.0566573	MUC7, SMR3B	152	7	18201	34.2124	0.997811	0.493619	47.9684
INTERPRO	IPR000690:Zinc finger, C2H2-type matrin	2	1.14943	0.0566624	SNRPC, SF3A2	122	8	16659	34.1373	0.999357	0.320792	49.1104
GOTERM_BP_FAT	GO:0000122~negative regulation of transcription from RNA polymerase II promoter	6	3.44828	0.0579817	CDKN1C, HOXB4, ATN1, HES7, PDX1, MYPOP	107	266	13528	2.8518	1	0.434051	58.847
GNF_U133A_QUARTILE	WHOLE BLOOD_3rd	41	23.5632	0.058613	MEF2B, GLTSCR1, COL3A1, SPRR2G, COL2A1, PDX1, CBLL1, SYNPO2L, AMELX, PROL1, ZYX, WIPF1, COL8A1, NPIPL3, BCL9, COL10A1, PRB2, COL18A1, PRB3, COL4A3, COL4A2, PRB1, COL4A1, PRG4, COL13A1, SNRPN, PRB4, LCE2B, MUC7, COL16A1, COL5A2, COL5A1, SNURF, COL4A5, CDKN1C, SPRR1A, SPRR1B, COL1A2, CPSF6, WASL, COL1A1, SMR3A, CSN2, SMR3B	105	4020	13036	1.26623	0.991007	0.610252	47.2133
GNF_U133A_QUARTILE	Thymus_3rd	28	16.092	0.0593719	PRH1, PRH2, ZNF580, WASF1, SOBP, WBP2, FAM168B, COL9A2, COL9A3, PRR4, ATN1, WIPF2, COL8A2, PRB2, PRB3, PRB1, MOBP, SNRPN, PRB4, EFS, MUC7, COL5A3, COL16A1, COL5A1, SNURF, COL4A5, CDKN1C, ATF5, BBC3, COL1A1, SMR3A, SMR3B	105	2521	13036	1.37892	0.991555	0.548733	47.6616
SP_PIR_KEYWORDS	cartilage	2	1.14943	0.059914	COL2A1, COL1A1	170	7	19235	32.3277	0.999906	0.244848	52.1837
UP_SEQ_FEATURE	compositionally biased region:Poly-Ala	8	4.5977	0.0605492	PRR18, PRRT1, BRD4, KLF2, DMRTB1, FOXE3, CDC42EP5, BCL9	170	393	19113	2.28864	1	0.519096	59.3616
BIOCARTA	h_smPathway:Spliceosomal Assembly	2	1.14943	0.0611223	SNRPB, SNRPC	7	15	1437	27.3714	0.356923	0.136847	27.7579
SMART	SM00301:DM	2	1.14943	0.0615551	DMRTC2, DMRTB1	83	7	9079	31.253	0.942668	0.248655	44.9797
SMART	SM00282:LamG	3	1.72414	0.062146	COL5A3, COL11A2, COL5A1	83	45	9079	7.29237	0.944271	0.230856	45.3047
GOTERM_BP_FAT	GO:0030705~cytoskeleton-dependent intracellular transport	3	1.72414	0.0626121	WASF2, WIPF1, WAS	107	52	13528	7.29403	1	0.455024	61.7535
SP_PIR_KEYWORDS	disease mutation	21	12.069	0.0660926	COL4A4, COL4A3, RAX, COL4A1, COL3A1, COL2A1, PDX1, WAS, COL5A2, COL5A1, COL4A5, CRX, CDKN1C, COL9A2, AMELX, COL1A2, SOX18, COL1A1, COL11A2, COL8A2, COL10A1	170	1591	19235	1.49346	0.999965	0.260416	55.8045
GOTERM_BP_FAT	GO:0042476~odontogenesis	3	1.72414	0.0669003	AMELX, COL1A2, COL1A1	107	54	13528	7.02388	1	0.472971	64.2734
KEGG_PATHWAY	hsa05222:Small cell lung cancer	3	1.72414	0.0678664	COL4A4, COL4A2, COL4A1	27	84	5085	6.72619	0.717767	0.190094	40.4315
SP_PIR_KEYWORDS	bone	2	1.14943	0.0681767	COL1A2, COL1A1	170	8	19235	28.2868	0.999975	0.261122	56.9679
UP_SEQ_FEATURE	domain:Collagen-like 5	2	1.14943	0.0685985	COL23A1, COL25A1	170	8	19113	28.1074	1	0.556925	64.1028
UP_SEQ_FEATURE	domain:Collagen-like 4	2	1.14943	0.0685985	COL23A1, COL25A1	170	8	19113	28.1074	1	0.556925	64.1028
UP_SEQ_FEATURE	short sequence motif:Nuclear localization signal	7	4.02299	0.0689284	CDKN1C, RAX, SF1, PYGO2, PDX1, ESX1, MYPOP	170	325	19113	2.42156	1	0.550623	64.2856
GNF_U133A_QUARTILE	Pancreas_3rd	32	18.3908	0.0690198	COL3A1, WASF2, VPS37C, WBP11, PDX1, SF3B4, FBRS, ZNF207, ATN1, WIPF2, SOX18, ZYX, BRD4, COL8A2, COL18A1, COL4A2, COL4A1, C15ORF39, EFS, MAPK1IP1L, SF3A2, COL5A3, COL5A2, COL5A1, CDKN1C, COL1A2, MNT, SPRR3, WASL, SNRPC, COL1A1, KLF2	105	3015	13036	1.3177	0.996221	0.549279	53.0692
GOTERM_BP_FAT	GO:0016071~mRNA metabolic process	7	4.02299	0.0705804	SF1, SNRPB, CPSF6, WBP11, SNRPC, SF3A2, SF3B4	107	370	13528	2.39192	1	0.486878	66.3116
GOTERM_BP_FAT	GO:0048704~embryonic skeletal system morphogenesis	3	1.72414	0.0735094	HOXB4, HOXA3, COL2A1	107	57	13528	6.65421	1	0.49645	67.8557
INTERPRO	IPR000697:EVH1	2	1.14943	0.0770798	WASL, WAS	122	11	16659	24.8271	0.999959	0.396699	60.5017
SP_PIR_KEYWORDS	cell adhesion	8	4.5977	0.0793436	COL18A1, COL4A3, COL13A1, EFS, ZYX, COL16A1, COL8A1, COL8A2	170	422	19235	2.14497	0.999996	0.291391	62.738
SP_PIR_KEYWORDS	mrna processing	6	3.44828	0.0797247	SF1, SNRPB, CPSF6, WBP11, SF3A2, SF3B4	170	260	19235	2.61109	0.999996	0.285963	62.9219
OMIM_DISEASE	Framingham Heart Study genome-wide association: results for pulmonary function measures	2	1.14943	0.0804182	SNRPN, COL1A2, SNURF	35	9	3671	23.3079	0.99968	0.931626	60.2822
GOTERM_BP_FAT	GO:0030041~actin filament polymerization	2	1.14943	0.0829224	WASF1, WAS	107	11	13528	22.9873	1	0.535539	72.3828
INTERPRO	IPR017995:Homeobox protein, antennapedia type	2	1.14943	0.0837877	HOXB4, PDX1	122	12	16659	22.7582	0.999984	0.40847	63.7014
UP_SEQ_FEATURE	zinc finger region:Matrin-type	2	1.14943	0.0850041	SNRPC, SF3A2	170	10	19113	22.4859	1	0.622177	72.2159
GOTERM_MF_FAT	GO:0008092~cytoskeletal protein binding	8	4.5977	0.0864285	FMN2, WASF1, WASF2, WIPF2, WIPF3, WASL, WIPF1, SYNPO2L	99	504	12983	2.08161	0.999989	0.418627	64.8947
GOTERM_BP_FAT	GO:0048562~embryonic organ morphogenesis	4	2.29885	0.086574	HOXB4, HOXA3, SOBP, COL2A1	107	133	13528	3.8024	1	0.546645	73.973
GNF_U133A_QUARTILE	Ovary_3rd	18	10.3448	0.0870923	COL18A1, COL4A2, COL4A1, NACA, MOBP, EFS, COL5A3, COL16A1, COL5A2, COL5A1, CDKN1C, COL9A3, COL1A2, WIPF1, COL1A1, KLF2, COL8A2, BCL9	105	1504	13036	1.48587	0.999181	0.588697	61.858
GOTERM_BP_FAT	GO:0001894~tissue homeostasis	3	1.72414	0.0873158	COL9A1, COL2A1, COL11A2	107	63	13528	6.02047	1	0.544903	74.2854
SP_PIR_KEYWORDS	Spliceosome	4	2.29885	0.0891717	SF1, SNRPB, SF3A2, SF3B4	170	120	19235	3.77157	0.999999	0.308359	67.2203
GOTERM_MF_FAT	GO:0005539~glycosaminoglycan binding	4	2.29885	0.0893357	COL13A1, COL25A1, COL5A3, COL5A1	99	140	12983	3.7469	0.999992	0.414895	66.1668
COG_ONTOLOGY	RNA processing and modification	2	1.14943	0.0907104	SF1, SF3A2	9	23	1950	18.8406	0.3784	0.3784	33.8708
GOTERM_CC_FAT	GO:0030027~lamellipodium	3	1.72414	0.0920688	WASF1, WASF2, WASL	94	70	12782	5.82766	0.999973	0.409271	66.3589
GOTERM_BP_FAT	GO:0048598~embryonic morphogenesis	6	3.44828	0.0934537	HOXB4, HOXA3, ZIC5, SOBP, COL2A1, PDX1	107	307	13528	2.47094	1	0.565675	76.7395
KEGG_PATHWAY	hsa04810:Regulation of actin cytoskeleton	4	2.29885	0.0949689	WASF1, WASF2, WASL, WAS	27	215	5085	3.50388	0.834063	0.226316	52.0756
SMART	SM00461:WH1	2	1.14943	0.095033	WASL, WAS	83	11	9079	19.8883	0.988819	0.312341	60.9015
GOTERM_MF_FAT	GO:0003714~transcription corepressor activity	4	2.29885	0.0967592	ATF5, ATN1, SF1, MNT	99	145	12983	3.61769	0.999997	0.427362	69.2266
GOTERM_BP_FAT	GO:0009952~anterior/posterior pattern formation	4	2.29885	0.0973069	HOXB4, CDX1, HOXA3, HES7	107	140	13528	3.61228	1	0.57623	78.1666
SP_PIR_KEYWORDS	chromosomal rearrangement	6	3.44828	0.0998817	LYL1, COL1A2, COL1A1, BRD4, COL4A5, BCL9	170	279	19235	2.43327	1	0.332841	71.5383
