# Supplementary material for: Proline: The Distribution, Frequency, Positioning, and Common Functional Roles of Proline and Polyproline Sequences in the Human Proteome
Source: PLoS One. 2013 Jan 25;8(1):e53785. doi: 10.1371/journal.pone.0053785 (PMC3556072; doi:10.1371/journal.pone.0053785)
Supplement: Table S5 — Start and Stop Positions of Polyproline Motifs Across Human Proteome. The start and stop positions of each polyproline span in the human proteome is shown. There are duplicate gene symbols for proteins with multiple polyproline spans. (XLS) [file pone.0053785.s009.xls]

## Sheet: polyProlinePositions.humanPepti
GeneSymbol	PeptideLength	Span	Start	StartRatio	End	EndRatio
A1BG	495	4	207	0.418182	210	0.424242
A1BG	495	3	399	0.806061	401	0.810101
A1CF	594	3	43	0.0723906	45	0.0757576
A2ML1	1454	3	84	0.0577717	86	0.0591472
AAAS	546	5	8	0.014652	12	0.021978
AAAS	546	3	34	0.0622711	36	0.0659341
AAAS	546	3	534	0.978022	536	0.981685
AAK1	961	3	398	0.414152	400	0.416233
AAK1	961	3	478	0.497399	480	0.49948
AAK1	961	3	607	0.631634	609	0.633715
AARSD1	586	3	179	0.305461	181	0.308874
ABCA1	2261	3	1485	0.656789	1487	0.657674
ABCA2	2466	3	345	0.139903	347	0.140714
ABCA2	2466	4	1621	0.65734	1624	0.658556
ABCA3	1708	3	3	0.00175644	5	0.0029274
ABCA3	1708	3	134	0.0784543	136	0.0796253
ABCA4	2273	3	1333	0.58645	1335	0.58733
ABCA4	2273	3	1510	0.66432	1512	0.6652
ABCA7	2146	4	1366	0.636533	1369	0.637931
ABCB8	735	3	720	0.979592	722	0.982313
ABCB9	769	3	164	0.213264	166	0.215865
ABCC2	1545	3	1290	0.834951	1292	0.836246
ABCC4	1325	3	1031	0.778113	1033	0.779623
ABCD1	745	3	534	0.716779	536	0.719463
ABCD2	740	3	538	0.727027	540	0.72973
ABCF1	845	3	617	0.730178	619	0.732544
ABCF2	634	3	392	0.618297	394	0.621451
ABHD8	439	4	57	0.129841	60	0.136674
ABI1	509	3	280	0.550098	282	0.554028
ABI1	509	5	365	0.717092	369	0.724951
ABI1	509	7	396	0.777996	402	0.789784
ABI1	509	8	412	0.80943	419	0.823183
ABI2	513	6	402	0.783626	407	0.793372
ABI2	513	7	417	0.812865	423	0.824561
ABI3	366	5	243	0.663934	247	0.674863
ABI3	366	4	264	0.721311	267	0.729508
ABI3	366	5	278	0.759563	282	0.770492
ABI3	366	5	291	0.795082	295	0.806011
ABI3BP	1777	3	107	0.0602138	109	0.0613393
ABL1	1149	3	801	0.697128	803	0.698869
ABL1	1149	5	918	0.798956	922	0.802437
ABL2	1182	5	984	0.832487	988	0.835871
ABL2	1182	3	1042	0.881557	1044	0.883249
ABLIM2	645	3	441	0.683721	443	0.686822
ABP1	770	3	758	0.984416	760	0.987013
ABT1	272	3	257	0.944853	259	0.952206
ABTB1	478	3	230	0.481172	232	0.485356
ACBD3	528	3	36	0.0681818	38	0.0719697
ACBD3	528	3	40	0.0757576	42	0.0795455
ACCN1	563	3	334	0.59325	336	0.596803
ACCN2	574	3	284	0.494774	286	0.498258
ACCN2	574	3	466	0.811847	468	0.815331
ACCN3	549	3	276	0.502732	278	0.506375
ACCN3	549	3	526	0.958106	528	0.961749
ACCN5	505	3	490	0.970297	492	0.974257
ACD	544	3	338	0.621324	340	0.625
ACIN1	1341	3	415	0.309471	417	0.310962
ACIN1	1341	3	426	0.317673	428	0.319165
ACIN1	1341	3	961	0.716629	963	0.718121
ACIN1	1341	6	1119	0.834452	1124	0.83818
ACLY	1155	3	293	0.25368	295	0.255411
ACLY	1155	3	871	0.754113	873	0.755844
ACOT8	319	3	146	0.45768	148	0.46395
ACR	421	4	302	0.71734	305	0.724466
ACR	421	3	309	0.733967	311	0.738717
ACR	421	3	330	0.783848	332	0.788599
ACR	421	3	346	0.821853	348	0.826603
ACR	421	8	350	0.831354	357	0.847981
ACR	421	9	362	0.859857	370	0.87886
ACSBG1	724	3	238	0.328729	240	0.331492
ACSS2	714	3	31	0.0434174	33	0.0462185
ACSS3	686	3	470	0.685131	472	0.688047
ACTR10	417	3	242	0.580336	244	0.585132
ACVR2A	513	4	180	0.350877	183	0.356725
ACVR2B	512	3	128	0.25	130	0.253906
ACVR2B	512	4	178	0.347656	181	0.353516
ADAD1	576	3	178	0.309028	180	0.3125
ADAD2	665	3	538	0.809023	540	0.81203
ADAM10	748	3	711	0.950535	713	0.953209
ADAM12	909	3	195	0.214521	197	0.216722
ADAM15	863	4	815	0.94438	818	0.947856
ADAM15	863	4	853	0.988413	856	0.991889
ADAM17	824	3	556	0.674757	558	0.677184
ADAM19	955	3	169	0.176963	171	0.179058
ADAM19	955	3	789	0.826178	791	0.828272
ADAM19	955	3	793	0.830366	795	0.832461
ADAM19	955	3	834	0.873298	836	0.875393
ADAM20	776	3	447	0.576031	449	0.578608
ADAM20	776	3	726	0.935567	728	0.938144
ADAM29	820	3	666	0.812195	668	0.814634
ADAM9	819	4	790	0.964591	793	0.968254
ADAMTS10	1103	4	58	0.0525839	61	0.0553037
ADAMTS10	1103	3	214	0.194016	216	0.19583
ADAMTS12	1594	3	1023	0.641782	1025	0.643036
ADAMTS12	1594	3	1412	0.885822	1414	0.887077
ADAMTS16	1224	4	45	0.0367647	48	0.0392157
ADAMTS17	1095	3	573	0.523288	575	0.525114
ADAMTS17	1095	3	1091	0.996347	1093	0.998174
ADAMTS19	1207	4	105	0.0869925	108	0.089478
ADAMTS19	1207	5	142	0.117647	146	0.120961
ADAMTS19	1207	3	148	0.122618	150	0.124275
ADAMTS19	1207	3	152	0.125932	154	0.127589
ADAMTS2	1211	3	24	0.0198183	26	0.0214699
ADAMTS2	1211	6	29	0.0239472	34	0.028076
ADAMTS2	1211	3	1108	0.914946	1110	0.916598
ADAMTS3	1205	3	1058	0.878008	1060	0.879668
ADAMTS4	837	3	464	0.554361	466	0.55675
ADAMTS6	1117	3	1018	0.91137	1020	0.91316
ADAMTS7	1686	3	819	0.485765	821	0.486951
ADAMTS7	1686	3	1096	0.650059	1098	0.651246
ADAMTS7	1686	4	1141	0.67675	1144	0.678529
ADAMTS7	1686	3	1207	0.715896	1209	0.717082
ADAMTS7	1686	3	1294	0.767497	1296	0.768683
ADAMTS8	918	4	230	0.250545	233	0.253813
ADAMTS9	1935	3	1167	0.603101	1169	0.604134
ADAMTSL3	1691	3	1421	0.840331	1423	0.841514
ADAMTSL4	1097	3	625	0.569736	627	0.571559
ADARB1	741	3	229	0.309042	231	0.311741
ADARB2	739	3	82	0.110961	84	0.113667
ADC	480	3	309	0.64375	311	0.647917
ADCK3	647	3	601	0.928903	603	0.931994
ADCK4	544	3	480	0.882353	482	0.886029
ADCY10	1610	3	220	0.136646	222	0.137888
ADCY10	1610	3	1195	0.742236	1197	0.743478
ADCY4	1077	3	9	0.00835655	11	0.0102136
ADCY7	1080	4	460	0.425926	463	0.428704
ADCY9	1353	4	815	0.602365	818	0.604582
ADD1	768	3	13	0.0169271	15	0.0195312
ADD1	768	3	641	0.834635	643	0.83724
ADD2	726	4	12	0.0165289	15	0.0206612
ADD3	706	4	13	0.0184136	16	0.0226629
ADNP	1102	3	435	0.394737	437	0.396552
ADNP2	1131	3	210	0.185676	212	0.187445
ADRA1B	520	3	436	0.838462	438	0.842308
ADRA2C	462	3	278	0.601732	280	0.606061
ADRB1	477	3	285	0.597484	287	0.601677
ADRB1	477	3	420	0.880503	422	0.884696
ADRBK1	689	3	467	0.677794	469	0.680697
ADRBK2	688	3	467	0.678779	469	0.681686
AEBP1	1158	4	57	0.0492228	60	0.0518135
AEBP1	1158	4	184	0.158895	187	0.161485
AEBP1	1158	3	258	0.222798	260	0.224525
AEBP1	1158	4	320	0.276339	323	0.278929
AFAP1	814	3	81	0.0995086	83	0.101966
AFAP1	814	4	260	0.31941	263	0.323096
AFAP1	814	3	541	0.664619	543	0.667076
AFAP1L1	768	3	114	0.148438	116	0.151042
AFAP1L1	768	3	121	0.157552	123	0.160156
AFAP1L2	871	3	101	0.115959	103	0.118255
AFF1	1218	3	282	0.231527	284	0.233169
AFF1	1218	3	375	0.307882	377	0.309524
AFF1	1218	3	569	0.467159	571	0.468801
AFF1	1218	3	763	0.626437	765	0.628079
AFF1	1218	4	873	0.716749	876	0.719212
AFF2	1311	3	137	0.1045	139	0.106026
AFF2	1311	3	474	0.361556	476	0.363082
AFF2	1311	3	559	0.426392	561	0.427918
AFF2	1311	3	914	0.697178	916	0.698703
AFF3	1251	3	588	0.470024	590	0.471623
AFF4	1163	3	328	0.282029	330	0.283749
AFF4	1163	3	466	0.400688	468	0.402408
AFM	599	3	521	0.869783	523	0.873122
AFTPH	937	3	13	0.0138741	15	0.0160085
AGAP1	1069	3	730	0.682881	732	0.684752
AGAP10	703	3	436	0.620199	438	0.623044
AGAP2	1192	5	28	0.0234899	32	0.0268456
AGAP2	1192	4	182	0.152685	185	0.155201
AGAP2	1192	3	290	0.243289	292	0.244966
AGAP2	1192	3	787	0.660235	789	0.661913
AGAP2	1192	3	824	0.691275	826	0.692953
AGAP3	911	3	571	0.626784	573	0.628979
AGAP4	663	3	368	0.555053	370	0.558069
AGAP5	686	3	391	0.569971	393	0.572886
AGAP6	686	3	391	0.569971	393	0.572886
AGAP7	663	3	368	0.555053	370	0.558069
AGAP8	663	3	368	0.555053	370	0.558069
AGAP9	703	3	436	0.620199	438	0.623044
AGBL1	1062	3	494	0.46516	496	0.467043
AGBL2	904	4	114	0.126106	117	0.129425
AGBL5	886	5	540	0.609481	544	0.613995
AGFG2	481	3	212	0.440748	214	0.444906
AGGF1	714	4	12	0.0168067	15	0.0210084
AGRN	2045	3	626	0.306112	628	0.30709
AGRN	2045	3	1018	0.4978	1020	0.498778
AGTPBP1	1238	3	668	0.53958	670	0.541195
AHCTF1	2301	3	499	0.216862	501	0.217731
AHCTF1	2301	3	2248	0.976967	2250	0.977836
AHDC1	1603	3	63	0.0393013	65	0.040549
AHDC1	1603	3	158	0.0985652	160	0.0998129
AHDC1	1603	10	429	0.267623	438	0.273238
AHDC1	1603	3	949	0.592015	951	0.593263
AHDC1	1603	3	1022	0.637555	1024	0.638802
AHDC1	1603	3	1414	0.882096	1416	0.883344
AHRR	719	3	189	0.262865	191	0.265647
AHSP	102	3	98	0.960784	100	0.980392
AIF1L	176	3	166	0.943182	168	0.954545
AIM1	1723	3	98	0.0568775	100	0.0580383
AIPL1	384	3	374	0.973958	376	0.979167
AIRE	545	3	124	0.227523	126	0.231193
AK8	479	3	408	0.851775	410	0.85595
AKAP1	945	3	472	0.499471	474	0.501587
AKAP12	1782	3	1396	0.783389	1398	0.784512
AKAP13	2817	3	954	0.338658	956	0.339368
AKAP2	1103	3	1006	0.912058	1008	0.913871
AKAP6	2319	3	55	0.0237171	57	0.0245796
AKAP8	692	3	243	0.351156	245	0.354046
AKAP8L	646	7	602	0.931889	608	0.941176
AKIRIN1	192	4	45	0.234375	48	0.25
AKNA	1439	3	1044	0.725504	1046	0.726894
AKNA	1439	3	1263	0.877693	1265	0.879083
AKNA	1439	3	1321	0.917999	1323	0.919388
AKNA	1439	3	1378	0.957609	1380	0.958999
AKR7A2	359	3	21	0.0584958	23	0.0640669
AKR7A2	359	4	33	0.091922	36	0.100279
AKT1S1	276	5	55	0.199275	59	0.213768
AKT1S1	276	3	100	0.362319	102	0.369565
ALCAM	583	3	276	0.473413	278	0.476844
ALG13	1137	27	919	0.808267	945	0.831135
ALG13	1137	4	957	0.841689	960	0.844327
ALG13	1137	4	962	0.846086	965	0.848725
ALK	1620	3	1441	0.889506	1443	0.890741
ALKBH3	286	3	221	0.772727	223	0.77972
ALKBH6	266	3	182	0.684211	184	0.691729
ALKBH7	221	3	217	0.9819	219	0.99095
ALOX12	663	3	564	0.850679	566	0.853695
ALOX15	684	4	348	0.508772	351	0.513158
ALOX15	684	3	586	0.856725	588	0.859649
ALOX15B	676	3	577	0.85355	579	0.856509
ALOX5	674	3	575	0.853116	577	0.856083
ALOXE3	867	3	768	0.885813	770	0.88812
ALS2CR11	1820	3	269	0.147802	271	0.148901
ALX4	411	3	101	0.245742	103	0.250608
AMBN	447	3	107	0.239374	109	0.243848
AMBRA1	1298	6	270	0.208012	275	0.211864
AMBRA1	1298	3	436	0.335901	438	0.337442
AMELX	205	3	134	0.653659	136	0.663415
AMH	560	3	151	0.269643	153	0.273214
AMH	560	3	272	0.485714	274	0.489286
AMHR2	573	3	124	0.216405	126	0.219895
AMHR2	573	3	433	0.755672	435	0.759162
AMMECR1	333	3	87	0.261261	89	0.267267
AMOT	1084	3	238	0.219557	240	0.221402
AMOTL1	956	3	309	0.323222	311	0.325314
AMOTL1	956	3	366	0.382845	368	0.384937
AMOTL1	956	3	420	0.439331	422	0.441423
AMOTL1	956	4	847	0.885983	850	0.889121
AMOTL2	837	3	267	0.318996	269	0.321386
AMOTL2	837	4	330	0.394265	333	0.397849
AMPD3	776	3	209	0.26933	211	0.271907
ANGPTL1	491	3	251	0.511202	253	0.515275
ANGPTL2	493	3	216	0.438134	218	0.442191
ANGPTL2	493	3	252	0.511156	254	0.515213
ANGPTL6	470	4	197	0.419149	200	0.425532
ANK1	1905	3	962	0.504987	964	0.506037
ANK2	3957	3	1050	0.265353	1052	0.265858
ANK3	4377	3	1033	0.236006	1035	0.236463
ANK3	4377	3	1223	0.279415	1225	0.279872
ANK3	4377	5	3255	0.74366	3259	0.744574
ANKHD1	2617	4	31	0.0118456	34	0.012992
ANKHD1	2617	3	706	0.269775	708	0.270539
ANKHD1	2617	3	2365	0.903707	2367	0.904471
ANKIB1	1089	3	291	0.267218	293	0.269054
ANKLE2	938	3	50	0.0533049	52	0.0554371
ANKMY1	1030	3	484	0.469903	486	0.471845
ANKRD11	2663	3	2352	0.883214	2354	0.883965
ANKRD11	2663	3	2493	0.936162	2495	0.936913
ANKRD12	2062	3	1891	0.917071	1893	0.918041
ANKRD13C	541	3	414	0.76525	416	0.768946
ANKRD13D	605	3	520	0.859504	522	0.86281
ANKRD17	2603	3	727	0.279293	729	0.280061
ANKRD17	2603	3	1886	0.724549	1888	0.725317
ANKRD17	2603	3	2129	0.817902	2131	0.818671
ANKRD17	2603	3	2180	0.837495	2182	0.838264
ANKRD2	360	3	136	0.377778	138	0.383333
ANKRD24	1236	4	398	0.322006	401	0.324434
ANKRD33	452	4	350	0.774336	353	0.780973
ANKRD33B	494	4	19	0.0384615	22	0.0445344
ANKRD33B	494	4	264	0.534413	267	0.540486
ANKRD34A	496	3	298	0.600806	300	0.604839
ANKRD36	1941	3	540	0.278207	542	0.279238
ANKRD43	549	3	183	0.333333	185	0.336976
ANKRD43	549	3	300	0.546448	302	0.550091
ANKRD55	614	3	328	0.534202	330	0.537459
ANKRD6	727	4	382	0.525447	385	0.529574
ANKRD6	727	3	645	0.887208	647	0.889959
ANKS1A	1134	3	319	0.281305	321	0.283069
ANKS1A	1134	4	407	0.358907	410	0.361552
ANKS1A	1134	3	413	0.364198	415	0.365961
ANO8	1232	3	21	0.0170455	23	0.0186688
ANO8	1232	3	1008	0.818182	1010	0.819805
ANO8	1232	4	1132	0.918831	1135	0.921266
ANO8	1232	3	1181	0.958604	1183	0.960227
ANO8	1232	4	1198	0.972403	1201	0.974838
ANTXR1	564	4	355	0.629433	358	0.634752
ANTXR1	564	3	506	0.897163	508	0.900709
ANTXR1	564	4	514	0.911348	517	0.916667
ANTXR1	564	5	522	0.925532	526	0.932624
ANTXR1	564	4	541	0.95922	544	0.964539
ANTXR1	564	3	547	0.969858	549	0.973404
ANTXR1	564	3	553	0.980496	555	0.984043
ANTXR1	564	3	558	0.989362	560	0.992908
ANTXR2	489	5	352	0.719836	356	0.728016
ANXA10	324	3	89	0.274691	91	0.280864
ANXA11	505	4	7	0.0138614	10	0.019802
ANXA11	505	4	29	0.0574257	32	0.0633663
ANXA11	505	3	107	0.211881	109	0.215842
ANXA11	505	3	134	0.265347	136	0.269307
AOC2	756	3	114	0.150794	116	0.153439
AOC2	756	3	288	0.380952	290	0.383598
AOC3	763	3	118	0.154653	120	0.157274
AP1G1	845	3	637	0.753846	639	0.756213
AP1G2	785	4	661	0.842038	664	0.84586
AP2A1	977	3	269	0.275333	271	0.27738
AP2A1	977	3	667	0.682702	669	0.684749
AP2A2	940	3	269	0.28617	271	0.288298
AP2A2	940	3	675	0.718085	677	0.720213
AP3D1	1215	3	879	0.723457	881	0.725103
APBB1IP	666	3	32	0.048048	34	0.0510511
APBB1IP	666	4	129	0.193694	132	0.198198
APBB1IP	666	5	142	0.213213	146	0.219219
APBB1IP	666	5	517	0.776276	521	0.782282
APBB1IP	666	8	555	0.833333	562	0.843844
APBB1IP	666	5	569	0.854354	573	0.86036
APBB1IP	666	3	578	0.867868	580	0.870871
APBB1IP	666	5	584	0.876877	588	0.882883
APBB1IP	666	8	599	0.899399	606	0.90991
APBB1IP	666	3	619	0.929429	621	0.932432
APBB2	759	5	722	0.951252	726	0.956522
APC	2843	5	1439	0.506155	1443	0.507562
APC	2843	3	1602	0.563489	1604	0.564193
APC2	2303	3	1559	0.676943	1561	0.677812
APC2	2303	3	1941	0.842814	1943	0.843682
APC2	2303	3	2181	0.947026	2183	0.947894
APCDD1L	512	3	282	0.550781	284	0.554688
APEH	737	3	470	0.63772	472	0.640434
APLP1	651	3	211	0.324117	213	0.327189
APLP1	651	3	271	0.416283	273	0.419355
APOA5	366	4	316	0.863388	319	0.871585
APOBEC3B	490	5	391	0.797959	395	0.806122
APOBEC3B	490	3	434	0.885714	436	0.889796
APOC4	127	3	38	0.299213	40	0.314961
APOH	345	3	143	0.414493	145	0.42029
APOL2	449	3	353	0.786192	355	0.790646
AQP3	292	3	272	0.931507	274	0.938356
AR	920	8	374	0.406522	381	0.41413
ARAP1	1450	3	208	0.143448	210	0.144828
ARAP1	1450	3	252	0.173793	254	0.175172
ARAP1	1450	3	807	0.556552	809	0.557931
ARAP3	1544	3	135	0.0874352	137	0.0887306
ARAP3	1544	3	742	0.48057	744	0.481865
ARAP3	1544	3	1465	0.948834	1467	0.95013
ARC	396	3	176	0.444444	178	0.449495
ARF3	210	4	138	0.657143	141	0.671429
ARFGAP1	414	3	190	0.458937	192	0.463768
ARFGAP3	516	3	144	0.27907	146	0.282946
ARFGEF1	1849	4	1551	0.838832	1554	0.840454
ARHGAP15	475	3	399	0.84	401	0.844211
ARHGAP17	881	3	542	0.61521	544	0.61748
ARHGAP17	881	3	646	0.733258	648	0.735528
ARHGAP17	881	3	714	0.810443	716	0.812713
ARHGAP17	881	4	810	0.91941	813	0.922815
ARHGAP19	517	3	236	0.45648	238	0.460348
ARHGAP20	1191	3	1073	0.900924	1075	0.902603
ARHGAP21	1958	3	199	0.101634	201	0.102656
ARHGAP23	1491	3	185	0.124078	187	0.125419
ARHGAP23	1491	3	403	0.270288	405	0.27163
ARHGAP27	889	3	211	0.237345	213	0.239595
ARHGAP28	722	3	99	0.137119	101	0.139889
ARHGAP31	1444	3	427	0.295706	429	0.297091
ARHGAP31	1444	3	673	0.466066	675	0.467452
ARHGAP31	1444	4	785	0.543629	788	0.545706
ARHGAP32	2087	3	490	0.234787	492	0.235745
ARHGAP32	2087	6	1031	0.494011	1036	0.496406
ARHGAP32	2087	4	1307	0.626258	1310	0.627695
ARHGAP32	2087	3	1979	0.948251	1981	0.949209
ARHGAP33	1287	4	126	0.0979021	129	0.100233
ARHGAP33	1287	3	433	0.336441	435	0.337995
ARHGAP33	1287	4	876	0.680653	879	0.682984
ARHGAP33	1287	5	889	0.690754	893	0.693862
ARHGAP33	1287	3	951	0.738928	953	0.740482
ARHGAP33	1287	3	966	0.750583	968	0.752137
ARHGAP33	1287	4	1266	0.983683	1269	0.986014
ARHGAP35	1513	3	1038	0.686054	1040	0.687376
ARHGAP35	1513	3	1477	0.976206	1479	0.977528
ARHGAP44	818	3	739	0.903423	741	0.905868
ARHGAP5	1502	3	988	0.65779	990	0.659121
ARHGAP5	1502	3	1037	0.690413	1039	0.691744
ARHGAP5	1502	4	1463	0.974035	1466	0.976032
ARHGAP5	1502	3	1482	0.986684	1484	0.988016
ARHGAP6	974	3	86	0.0882957	88	0.0903491
ARHGAP6	974	3	94	0.0965092	96	0.0985626
ARHGAP6	974	4	880	0.903491	883	0.906571
ARHGAP8	643	3	386	0.600311	388	0.603421
ARHGAP8	643	3	392	0.609642	394	0.612753
ARHGAP9	821	3	203	0.247259	205	0.249695
ARHGAP9	821	3	275	0.334957	277	0.337393
ARHGAP9	821	3	434	0.528624	436	0.53106
ARHGDIB	201	3	26	0.129353	28	0.139303
ARHGEF10L	1279	3	6	0.00469116	8	0.00625489
ARHGEF11	1562	6	151	0.0966709	156	0.099872
ARHGEF11	1562	3	158	0.101152	160	0.102433
ARHGEF11	1562	4	1134	0.725992	1137	0.727913
ARHGEF12	1544	4	714	0.462435	717	0.464378
ARHGEF15	841	3	119	0.141498	121	0.143876
ARHGEF15	841	3	839	0.997622	841	1
ARHGEF17	2063	3	171	0.082889	173	0.0838585
ARHGEF17	2063	3	894	0.433349	896	0.434319
ARHGEF17	2063	3	1567	0.759573	1569	0.760543
ARHGEF17	2063	5	1992	0.965584	1996	0.967523
ARHGEF18	1173	3	1114	0.949702	1116	0.951407
ARHGEF18	1173	3	1125	0.959079	1127	0.960784
ARHGEF26	871	5	138	0.158439	142	0.163031
ARHGEF37	675	3	483	0.715556	485	0.718519
ARHGEF40	1519	3	561	0.369322	563	0.370639
ARHGEF40	1519	3	1109	0.730086	1111	0.731402
ARHGEF5	1597	5	726	0.454602	730	0.457107
ARHGEF5	1597	3	759	0.475266	761	0.476518
ARHGEF5	1597	3	851	0.532874	853	0.534126
ARHGEF9	516	3	469	0.908915	471	0.912791
ARID1A	2285	6	16	0.00700219	21	0.00919037
ARID1A	2285	3	144	0.0630197	146	0.063895
ARID1A	2285	3	223	0.097593	225	0.0984683
ARID1A	2285	3	251	0.109847	253	0.110722
ARID1A	2285	3	598	0.261707	600	0.262582
ARID1A	2285	3	885	0.387309	887	0.388184
ARID1A	2285	3	1113	0.48709	1115	0.487965
ARID1A	2285	3	1567	0.685777	1569	0.686652
ARID1A	2285	3	1574	0.68884	1576	0.689716
ARID1A	2285	3	1897	0.830197	1899	0.831072
ARID1B	2289	5	446	0.194845	450	0.196592
ARID1B	2289	3	1202	0.52512	1204	0.525994
ARID1B	2289	3	1635	0.714286	1637	0.715159
ARID1B	2289	3	1639	0.716033	1641	0.716907
ARID1B	2289	4	1886	0.823941	1889	0.825251
ARID1B	2289	3	2224	0.971603	2226	0.972477
ARID2	1835	3	511	0.278474	513	0.279564
ARID2	1835	3	999	0.544414	1001	0.545504
ARID2	1835	3	1021	0.556403	1023	0.557493
ARID2	1835	3	1085	0.591281	1087	0.592371
ARID3C	412	3	240	0.582524	242	0.587379
ARID3C	412	3	400	0.970874	402	0.975728
ARID4B	1312	3	987	0.752287	989	0.753811
ARID5B	1188	3	713	0.600168	715	0.601852
ARL13B	428	7	374	0.873832	380	0.88785
ARL15	204	3	26	0.127451	28	0.137255
ARL16	197	3	58	0.294416	60	0.304569
ARMC3	872	3	11	0.0126147	13	0.0149083
ARMC5	1030	3	916	0.88932	918	0.891262
ARMCX2	632	3	141	0.223101	143	0.226266
ARNTL	626	3	528	0.84345	530	0.846645
ARPP21	813	3	621	0.763838	623	0.766298
ARPP21	813	3	632	0.777368	634	0.779828
ARRDC2	407	3	384	0.943489	386	0.948403
ARRDC3	414	3	390	0.942029	392	0.94686
ARRDC4	418	3	394	0.942584	396	0.947368
ARSB	533	3	452	0.84803	454	0.851782
ARSJ	599	4	10	0.0166945	13	0.0217028
ART1	327	3	105	0.321101	107	0.327217
ARTN	237	3	71	0.299578	73	0.308017
ARTN	237	3	98	0.413502	100	0.421941
ARTN	237	4	107	0.451477	110	0.464135
ARTN	237	3	193	0.814346	195	0.822785
ARVCF	962	3	935	0.971933	937	0.974012
ARX	562	6	126	0.224199	131	0.233096
ARX	562	4	184	0.327402	187	0.33274
ARX	562	4	445	0.791815	448	0.797153
ASAP1	1132	6	830	0.733216	835	0.737633
ASAP1	1132	3	937	0.827739	939	0.829505
ASAP2	1006	3	771	0.766402	773	0.76839
ASAP2	1006	4	846	0.840954	849	0.843936
ASAP2	1006	3	876	0.870775	878	0.872763
ASAP3	903	3	752	0.83278	754	0.834994
ASB10	512	3	36	0.0703125	38	0.0742188
ASB6	421	3	372	0.88361	374	0.888361
ASCC2	757	3	42	0.0554822	44	0.0581242
ASGR1	291	4	25	0.0859107	28	0.0962199
ASGR2	311	3	43	0.138264	45	0.144695
ASH1L	2969	4	1410	0.474907	1413	0.475918
ASH1L	2969	3	1422	0.478949	1424	0.479623
ASPHD1	390	3	236	0.605128	238	0.610256
ASTN2	1339	3	28	0.0209111	30	0.0224048
ASTN2	1339	4	43	0.0321135	46	0.034354
ASXL3	2248	3	1130	0.502669	1132	0.503559
ASXL3	2248	3	1692	0.752669	1694	0.753559
ASXL3	2248	12	2017	0.897242	2028	0.902135
ASXL3	2248	9	2032	0.903915	2040	0.907473
ASXL3	2248	3	2042	0.908363	2044	0.909253
ATAD2	1390	3	963	0.692806	965	0.694245
ATAD3A	634	4	18	0.0283912	21	0.033123
ATAD3B	648	4	18	0.0277778	21	0.0324074
ATAD5	1844	3	13	0.00704989	15	0.00813449
ATAD5	1844	3	1219	0.661063	1221	0.662148
ATAT1	421	3	266	0.631829	268	0.63658
ATF5	282	3	123	0.43617	125	0.443262
ATF5	282	3	127	0.450355	129	0.457447
ATF5	282	4	131	0.464539	134	0.475177
ATF5	282	3	181	0.641844	183	0.648936
ATF5	282	4	186	0.659574	189	0.670213
ATF6	670	4	463	0.691045	466	0.695522
ATF6B	703	3	275	0.391181	277	0.394026
ATG2A	1940	3	1245	0.641753	1247	0.642784
ATG2A	1940	3	1326	0.683505	1328	0.684536
ATG3	314	4	254	0.808917	257	0.818471
ATN1	1190	3	161	0.135294	163	0.136975
ATN1	1190	3	213	0.178992	215	0.180672
ATN1	1190	3	254	0.213445	256	0.215126
ATN1	1190	3	289	0.242857	291	0.244538
ATN1	1190	4	302	0.253782	305	0.256303
ATN1	1190	3	413	0.347059	415	0.348739
ATN1	1190	6	442	0.371429	447	0.37563
ATN1	1190	4	509	0.427731	512	0.430252
ATN1	1190	3	550	0.462185	552	0.463866
ATN1	1190	3	636	0.534454	638	0.536134
ATN1	1190	4	709	0.595798	712	0.598319
ATN1	1190	3	749	0.629412	751	0.631092
ATOH1	354	5	31	0.0875706	35	0.0988701
ATOH1	354	5	224	0.632768	228	0.644068
ATOH8	321	7	124	0.386293	130	0.404984
ATP10A	1499	3	33	0.0220147	35	0.0233489
ATP11A	1191	3	33	0.0277078	35	0.0293871
ATP11A	1191	3	1163	0.97649	1165	0.97817
ATP1A1	1023	3	82	0.0801564	84	0.0821114
ATP1A2	1020	3	80	0.0784314	82	0.0803922
ATP1A3	1226	3	72	0.0587276	74	0.0603589
ATP1A3	1226	3	1158	0.944535	1160	0.946166
ATP1A4	1029	3	90	0.0874636	92	0.0894072
ATP2B1	1220	3	1179	0.966393	1181	0.968033
ATP2B3	1220	4	1174	0.962295	1177	0.964754
ATP5SL	333	3	55	0.165165	57	0.171171
ATP6V0B	261	3	238	0.911877	240	0.91954
ATP8A2	1188	3	469	0.394781	471	0.396465
ATP8B4	1192	3	1153	0.967282	1155	0.96896
ATRIP	791	3	22	0.0278129	24	0.0303413
ATRN	1429	3	1383	0.96781	1385	0.969209
ATRNL1	1379	3	1334	0.967368	1336	0.968818
ATRX	2492	3	2469	0.99077	2471	0.991573
ATRX	2492	3	2476	0.993579	2478	0.994382
ATXN1	815	3	239	0.293252	241	0.295706
ATXN10	475	3	6	0.0126316	8	0.0168421
ATXN1L	689	3	187	0.271408	189	0.274311
ATXN1L	689	3	457	0.66328	459	0.666183
ATXN2	1313	4	55	0.0418888	58	0.0441736
ATXN2	1313	3	62	0.0472201	64	0.0487433
ATXN2	1313	3	189	0.143945	191	0.145468
ATXN2L	1097	3	16	0.0145852	18	0.0164084
ATXN2L	1097	4	81	0.0738377	84	0.0765725
ATXN2L	1097	4	436	0.397448	439	0.400182
ATXN2L	1097	4	624	0.568824	627	0.571559
ATXN2L	1097	3	976	0.889699	978	0.891522
ATXN7	945	4	40	0.042328	43	0.0455026
ATXN7	945	5	51	0.0539683	55	0.0582011
ATXN7	945	3	470	0.497354	472	0.499471
ATXN7L2	722	5	114	0.157895	118	0.163435
ATXN7L2	722	3	397	0.549861	399	0.552632
AUTS2	1259	3	334	0.26529	336	0.266878
AUTS2	1259	5	467	0.370929	471	0.374106
AUTS2	1259	3	516	0.409849	518	0.411438
AUTS2	1259	3	727	0.577442	729	0.579031
AUTS2	1259	3	806	0.640191	808	0.641779
AUTS2	1259	4	1005	0.798253	1008	0.800635
AUTS2	1259	3	1220	0.969023	1222	0.970612
AVPI1	147	3	11	0.0748299	13	0.0884354
AZI1	1083	3	26	0.0240074	28	0.0258541
B3GALNT2	500	3	26	0.052	28	0.056
B3GALT2	422	3	357	0.845972	359	0.850711
B3GALT6	329	4	47	0.142857	50	0.151976
B3GAT1	347	3	89	0.256484	91	0.262248
B3GAT3	335	3	61	0.18209	63	0.18806
B3GAT3	335	4	181	0.540299	184	0.549254
B3GNT7	401	4	38	0.0947631	41	0.102244
B4GALNT4	1039	3	512	0.492782	514	0.494706
B4GALNT4	1039	3	521	0.501444	523	0.503369
B4GALT1	398	4	84	0.211055	87	0.218593
B4GALT7	327	3	79	0.24159	81	0.247706
BABAM1	329	3	76	0.231003	78	0.237082
BABAM1	329	3	206	0.62614	208	0.632219
BAG1	345	3	41	0.118841	43	0.124638
BAG3	575	4	355	0.617391	358	0.622609
BAG3	575	3	374	0.650435	376	0.653913
BAG4	457	4	32	0.0700219	35	0.0765864
BAG6	1162	3	196	0.168675	198	0.170396
BAG6	1162	3	388	0.333907	390	0.335628
BAG6	1162	3	397	0.341652	399	0.343373
BAG6	1162	3	422	0.363167	424	0.364888
BAG6	1162	3	428	0.36833	430	0.370052
BAG6	1162	3	594	0.511188	596	0.512909
BAG6	1162	3	624	0.537005	626	0.538726
BAG6	1162	12	687	0.591222	698	0.600688
BAG6	1162	3	706	0.607573	708	0.609294
BAG6	1162	3	1018	0.876076	1020	0.877797
BAI1	1584	3	859	0.542298	861	0.543561
BAI1	1584	12	1411	0.890783	1422	0.897727
BAI1	1584	4	1427	0.900884	1430	0.902778
BAI2	1585	3	829	0.523028	831	0.52429
BAI2	1585	4	1315	0.829653	1318	0.831546
BAI2	1585	4	1425	0.899054	1428	0.900946
BAIAP2	552	3	467	0.846014	469	0.849638
BAIAP2L2	529	3	468	0.884688	470	0.888469
BANK1	785	3	512	0.652229	514	0.654777
BANP	519	3	353	0.680154	355	0.684008
BARHL1	327	3	286	0.874618	288	0.880734
BARHL1	327	4	309	0.944954	312	0.954128
BARHL2	387	4	94	0.242894	97	0.250646
BARHL2	387	6	120	0.310078	125	0.322997
BARX2	279	3	275	0.985663	277	0.992832
BATF	125	3	16	0.128	18	0.144
BAZ2A	1905	3	1338	0.702362	1340	0.703412
BBC3	261	3	246	0.942529	248	0.950192
BBS1	593	3	417	0.703204	419	0.706577
BCAM	628	3	588	0.936306	590	0.93949
BCAN	911	3	64	0.0702525	66	0.0724479
BCAN	911	3	817	0.896817	819	0.899012
BCAR1	916	3	397	0.433406	399	0.43559
BCAR1	916	3	411	0.44869	413	0.450873
BCAR1	916	3	459	0.501092	461	0.503275
BCAR3	825	3	58	0.070303	60	0.0727273
BCAR3	825	3	403	0.488485	405	0.490909
BCAR3	825	3	817	0.990303	819	0.992727
BCAS3	935	3	550	0.588235	552	0.590374
BCL11A	835	3	268	0.320958	270	0.323353
BCL11A	835	3	367	0.439521	369	0.441916
BCL11B	894	3	98	0.10962	100	0.111857
BCL11B	894	3	266	0.297539	268	0.299776
BCL11B	894	3	319	0.356823	321	0.35906
BCL11B	894	3	377	0.4217	379	0.423937
BCL11B	894	3	418	0.467562	420	0.469799
BCL2L12	334	4	269	0.805389	272	0.814371
BCL2L14	327	3	165	0.504587	167	0.510703
BCL6B	479	3	156	0.325678	158	0.329854
BCL9	1426	5	331	0.232118	335	0.234923
BCL9	1426	4	514	0.360449	517	0.362553
BCL9	1426	4	970	0.680224	973	0.682328
BCL9L	1499	3	213	0.142095	215	0.143429
BCL9L	1499	3	303	0.202135	305	0.203469
BCL9L	1499	6	307	0.204803	312	0.208139
BCL9L	1499	4	448	0.298866	451	0.300867
BCL9L	1499	4	560	0.373582	563	0.375584
BCL9L	1499	6	1125	0.7505	1130	0.753836
BCL9L	1499	3	1170	0.78052	1172	0.781855
BCL9L	1499	3	1462	0.975317	1464	0.976651
BCOR	1755	3	248	0.141311	250	0.14245
BCORL1	1785	3	453	0.253782	455	0.254902
BCR	1271	3	107	0.0841857	109	0.0857592
BEAN1	259	3	121	0.467181	123	0.474903
BEAN1	259	3	166	0.640927	168	0.648649
BEND3	828	3	242	0.292271	244	0.294686
BEND4	534	7	55	0.102996	61	0.114232
BEND4	534	3	75	0.140449	77	0.144195
BEND4	534	3	119	0.222846	121	0.226592
BEST2	509	3	463	0.909627	465	0.913556
BHLHA9	235	4	152	0.646809	155	0.659574
BHLHA9	235	3	216	0.919149	218	0.92766
BHLHE22	381	3	48	0.125984	50	0.131234
BHLHE22	381	3	78	0.204724	80	0.209974
BHLHE40	412	3	9	0.0218447	11	0.026699
BHLHE41	482	3	421	0.873444	423	0.877593
BICC1	974	3	545	0.559548	547	0.561602
BIN1	593	4	342	0.576728	345	0.581788
BIN2	565	4	417	0.738053	420	0.743363
BIRC6	4857	3	1772	0.364834	1774	0.365246
BIRC6	4857	3	1849	0.380688	1851	0.381099
BIRC6	4857	3	3568	0.73461	3570	0.735022
BIRC6	4857	3	4140	0.852378	4142	0.85279
BLACE	179	3	68	0.379888	70	0.391061
BLK	590	4	49	0.0830508	52	0.0881356
BLM	1417	3	209	0.147495	211	0.148906
BLNK	456	3	98	0.214912	100	0.219298
BLNK	456	3	198	0.434211	200	0.438596
BLNK	456	3	237	0.519737	239	0.524123
BMP6	513	3	24	0.0467836	26	0.0506823
BMP6	513	3	56	0.109162	58	0.11306
BMP6	513	3	124	0.241715	126	0.245614
BMP6	513	3	174	0.339181	176	0.34308
BMP8A	402	3	27	0.0671642	29	0.0721393
BMP8B	402	3	27	0.0671642	29	0.0721393
BMPR2	1038	3	132	0.127168	134	0.129094
BMS1	1282	3	80	0.0624025	82	0.0639626
BNC1	994	3	452	0.454728	454	0.45674
BNC2	1099	3	8	0.00727934	10	0.00909918
BNC2	1099	4	605	0.5505	608	0.55323
BNIP2	435	5	11	0.0252874	15	0.0344828
BNIP3L	229	4	8	0.0349345	11	0.0480349
BNIP3L	229	3	27	0.117904	29	0.126638
BOC	1115	3	258	0.23139	260	0.233184
BOC	1115	3	350	0.313901	352	0.315695
BOC	1115	3	823	0.738117	825	0.73991
BOD1	185	3	168	0.908108	170	0.918919
BOD1L	3051	4	9	0.00294985	12	0.00393314
BOD1L	3051	6	14	0.00458866	19	0.00622747
BOD1L	3051	6	25	0.00819403	30	0.00983284
BOLL	333	3	156	0.468468	158	0.474474
BOLL	333	3	253	0.75976	255	0.765766
BOP1	746	3	316	0.423592	318	0.426273
BPGM	259	3	123	0.474903	125	0.482625
BPI	487	3	267	0.548255	269	0.552361
BPIFB4	614	3	71	0.115635	73	0.118893
BPTF	3046	8	24	0.00787919	31	0.0101773
BPTF	3046	6	77	0.0252791	82	0.0269206
BPTF	3046	3	2809	0.922193	2811	0.92285
BPTF	3046	5	2813	0.923506	2817	0.924819
BRCA2	3418	3	3280	0.959626	3282	0.960211
BRD2	836	4	61	0.0729665	64	0.076555
BRD2	836	3	229	0.273923	231	0.276316
BRD3	726	4	21	0.0289256	24	0.0330579
BRD3	726	4	219	0.301653	222	0.305785
BRD3	726	3	264	0.363636	266	0.366391
BRD4	1362	4	45	0.0330396	48	0.0352423
BRD4	1362	3	215	0.157856	217	0.159325
BRD4	1362	3	250	0.183554	252	0.185022
BRD4	1362	3	259	0.190162	261	0.19163
BRD4	1362	3	474	0.348018	476	0.349486
BRD4	1362	3	568	0.417034	570	0.418502
BRD4	1362	3	595	0.436858	597	0.438326
BRD4	1362	5	757	0.5558	761	0.558737
BRD4	1362	7	764	0.56094	770	0.565345
BRD4	1362	8	776	0.56975	783	0.57489
BRD4	1362	3	797	0.585169	799	0.586637
BRD4	1362	4	954	0.700441	957	0.702643
BRD4	1362	4	959	0.704112	962	0.706314
BRD4	1362	7	974	0.715125	980	0.71953
BRD4	1362	3	984	0.722467	986	0.723935
BRD4	1362	3	992	0.728341	994	0.729809
BRD4	1362	4	1011	0.742291	1014	0.744493
BRD4	1362	3	1022	0.750367	1024	0.751836
BRD4	1362	4	1028	0.754772	1031	0.756975
BRD4	1362	3	1170	0.859031	1172	0.860499
BRD7	652	3	569	0.872699	571	0.875767
BRD8	1235	3	298	0.241296	300	0.242915
BRD9	597	3	120	0.201005	122	0.204355
BRDT	947	4	14	0.0147835	17	0.0179514
BRI3	125	5	37	0.296	41	0.328
BRPF1	1220	4	50	0.0409836	53	0.0434426
BRPF3	1205	4	785	0.651452	788	0.653942
BRPF3	1205	4	833	0.691286	836	0.693776
BRSK1	778	4	492	0.632391	495	0.636247
BRSK1	778	3	536	0.688946	538	0.691517
BRSK1	778	3	746	0.958869	748	0.96144
BRWD1	2320	3	588	0.253448	590	0.25431
BRWD3	1802	3	585	0.324639	587	0.325749
BSN	3926	3	532	0.135507	534	0.136016
BSN	3926	3	622	0.158431	624	0.15894
BSN	3926	3	2900	0.738665	2902	0.739175
BSN	3926	3	3389	0.86322	3391	0.863729
BTBD1	482	5	25	0.0518672	29	0.060166
BTBD11	1104	3	779	0.705616	781	0.707428
BTBD17	478	3	243	0.508368	245	0.512552
BTBD6	485	4	42	0.0865979	45	0.0927835
BTBD7	1132	6	759	0.670495	764	0.674912
BTBD7	1132	3	812	0.717314	814	0.719081
BTF3	206	3	32	0.15534	34	0.165049
BTG3	296	3	250	0.844595	252	0.851351
BTG3	296	3	276	0.932432	278	0.939189
BTK	659	3	73	0.110774	75	0.113809
BUD13	619	3	571	0.922456	573	0.925687
BZRAP1	1907	4	548	0.287362	551	0.288936
BZRAP1	1907	3	813	0.426324	815	0.427373
BZRAP1	1907	3	1732	0.908233	1734	0.909282
BZW1	451	3	23	0.0509978	25	0.0554324
C1orf106	663	3	248	0.374057	250	0.377074
C1orf106	663	3	284	0.428356	286	0.431373
C1orf116	601	3	199	0.331115	201	0.334443
C1orf116	601	3	264	0.439268	266	0.442596
C1orf127	823	3	465	0.565006	467	0.567436
C1orf132	145	3	125	0.862069	127	0.875862
C1orf138	129	4	27	0.209302	30	0.232558
C1orf144	158	3	36	0.227848	38	0.240506
C1orf159	380	3	198	0.521053	200	0.526316
C1orf168	728	3	228	0.313187	230	0.315934
C1orf168	728	4	277	0.380495	280	0.384615
C1orf170	696	3	468	0.672414	470	0.675287
C1orf172	398	3	36	0.0904523	38	0.0954774
C1orf172	398	3	195	0.48995	197	0.494975
C1orf173	1530	3	235	0.153595	237	0.154902
C1orf201	383	3	155	0.4047	157	0.409922
C1orf204	235	3	59	0.251064	61	0.259574
C1orf216	229	3	18	0.0786026	20	0.0873362
C1orf220	106	3	74	0.698113	76	0.716981
C1orf226	315	4	161	0.511111	164	0.520635
C1orf226	315	3	293	0.930159	295	0.936508
C1orf229	237	3	139	0.586498	141	0.594937
C1orf38	643	3	550	0.855365	552	0.858476
C1orf52	182	3	106	0.582418	108	0.593407
C1orf52	182	4	117	0.642857	120	0.659341
C1orf53	145	3	22	0.151724	24	0.165517
C1orf65	623	3	146	0.23435	148	0.23756
C1orf86	283	3	103	0.363958	105	0.371025
C1orf88	191	3	140	0.732984	142	0.743455
C1orf94	598	3	296	0.494983	298	0.498328
C1orf94	598	4	467	0.780936	470	0.785953
C1orf96	270	4	81	0.3	84	0.311111
C1QL1	258	3	59	0.228682	61	0.236434
C1QL2	287	4	69	0.240418	72	0.250871
C1QTNF5	243	3	116	0.477366	118	0.485597
C2	752	3	723	0.961436	725	0.964096
C2CD2	696	3	396	0.568966	398	0.571839
C2CD3	2353	3	567	0.240969	569	0.241819
C2CD3	2353	3	2021	0.858904	2023	0.859754
C2CD4D	353	3	110	0.311615	112	0.31728
C2orf16	1984	3	1107	0.557964	1109	0.558972
C2orf27A	203	4	185	0.91133	188	0.926108
C2orf27B	209	4	191	0.913876	194	0.92823
C2orf29	510	4	287	0.562745	290	0.568627
C2orf49	232	3	128	0.551724	130	0.560345
C2orf53	412	3	62	0.150485	64	0.15534
C2orf53	412	3	377	0.915049	379	0.919903
C2orf54	447	3	384	0.85906	386	0.863535
C2orf55	962	5	136	0.141372	140	0.14553
C2orf55	962	3	300	0.31185	302	0.313929
C2orf57	395	4	236	0.597468	239	0.605063
C2orf69	385	3	97	0.251948	99	0.257143
C2orf71	1288	4	831	0.645186	834	0.647516
C2orf71	1288	3	1059	0.822205	1061	0.823758
C2orf76	126	3	53	0.420635	55	0.436508
C2orf78	922	3	711	0.77115	713	0.773319
C2orf81	588	3	197	0.335034	199	0.338435
C3orf19	467	3	153	0.327623	155	0.331906
C3orf20	904	5	96	0.106195	100	0.110619
C3orf22	141	3	94	0.666667	96	0.680851
C3orf36	165	3	48	0.290909	50	0.30303
C3orf36	165	3	103	0.624242	105	0.636364
C3orf56	242	3	92	0.380165	94	0.38843
C3orf67	689	3	144	0.208999	146	0.211901
C3orf67	689	3	599	0.869376	601	0.872279
C3orf77	1692	3	4	0.00236407	6	0.0035461
C4BPA	597	3	52	0.0871022	54	0.0904523
C4BPA	597	3	177	0.296482	179	0.299832
C4orf21	2104	3	794	0.377376	796	0.378327
C4orf40	219	3	48	0.219178	50	0.228311
C4orf42	186	3	37	0.198925	39	0.209677
C4orf46	113	6	12	0.106195	17	0.150442
C4orf48	139	3	47	0.338129	49	0.352518
C4orf48	139	5	57	0.410072	61	0.438849
C4orf50	750	3	421	0.561333	423	0.564
C5orf25	872	3	124	0.142202	126	0.144495
C5orf32	97	3	6	0.0618557	8	0.0824742
C5orf32	97	3	36	0.371134	38	0.391753
C5orf39	193	3	24	0.124352	26	0.134715
C5orf49	147	3	19	0.129252	21	0.142857
C5orf52	159	3	156	0.981132	158	0.993711
C5orf64	130	3	50	0.384615	52	0.4
C6orf103	1667	3	473	0.283743	475	0.284943
C6orf103	1667	3	858	0.514697	860	0.515897
C6orf127	152	3	150	0.986842	152	1
C6orf132	1188	5	140	0.117845	144	0.121212
C6orf132	1188	5	171	0.143939	175	0.147306
C6orf132	1188	5	180	0.151515	184	0.154882
C6orf132	1188	5	188	0.158249	192	0.161616
C6orf132	1188	5	226	0.190236	230	0.193603
C6orf132	1188	3	305	0.256734	307	0.258418
C6orf132	1188	3	390	0.328283	392	0.329966
C6orf132	1188	3	397	0.334175	399	0.335859
C6orf132	1188	3	404	0.340067	406	0.341751
C6orf132	1188	4	987	0.830808	990	0.833333
C6orf136	496	3	61	0.122984	63	0.127016
C6orf146	585	3	381	0.651282	383	0.654701
C6orf174	947	3	160	0.168955	162	0.171067
C6orf174	947	4	190	0.200634	193	0.203801
C6orf27	891	3	65	0.0729517	67	0.0751964
C6orf58	330	3	160	0.484848	162	0.490909
C6orf72	330	3	32	0.0969697	34	0.10303
C6orf89	354	3	58	0.163842	60	0.169492
C6orf94	222	6	107	0.481982	112	0.504505
C10orf10	212	3	31	0.146226	33	0.15566
C10orf140	908	3	117	0.128855	119	0.131057
C10orf140	908	3	334	0.367841	336	0.370044
C10orf26	363	4	139	0.38292	142	0.391185
C10orf46	369	6	37	0.100271	42	0.113821
C10orf46	369	3	80	0.216802	82	0.222222
C10orf47	435	4	147	0.337931	150	0.344828
C10orf47	435	3	161	0.370115	163	0.374713
C10orf71	1435	3	117	0.0815331	119	0.0829268
C10orf71	1435	3	1015	0.707317	1017	0.708711
C10orf71	1435	3	1239	0.863415	1241	0.864808
C10orf71	1435	4	1322	0.921254	1325	0.923345
C10orf93	2715	3	2651	0.976427	2653	0.977164
C10orf95	257	3	136	0.529183	138	0.536965
C11orf36	158	3	56	0.35443	58	0.367089
C11orf41	1855	4	59	0.0318059	62	0.0334232
C11orf41	1855	4	1644	0.886253	1647	0.887871
C11orf42	333	3	252	0.756757	254	0.762763
C11orf42	333	3	261	0.783784	263	0.78979
C11orf42	333	3	300	0.900901	302	0.906907
C11orf49	337	3	218	0.646884	220	0.652819
C11orf51	190	3	149	0.784211	151	0.794737
C11orf53	236	3	91	0.385593	93	0.394068
C11orf53	236	3	179	0.758475	181	0.766949
C11orf72	251	3	231	0.920319	233	0.928287
C11orf84	381	3	50	0.131234	52	0.136483
C11orf84	381	3	313	0.821522	315	0.826772
C11orf87	197	6	164	0.832487	169	0.857868
C11orf89	479	4	23	0.0480167	26	0.0542797
C11orf89	479	3	250	0.521921	252	0.526096
C11orf89	479	3	452	0.943633	454	0.947808
C11orf9	1151	3	91	0.0790617	93	0.0807993
C11orf9	1151	5	178	0.154648	182	0.158123
C11orf9	1151	9	188	0.163336	196	0.170287
C11orf91	193	7	74	0.38342	80	0.414508
C11orf91	193	3	112	0.580311	114	0.590674
C11orf96	435	3	277	0.636782	279	0.641379
C11orf96	435	3	303	0.696552	305	0.701149
C12orf10	376	4	15	0.0398936	18	0.0478723
C12orf10	376	3	32	0.0851064	34	0.0904255
C12orf12	406	4	94	0.231527	97	0.238916
C12orf34	452	3	168	0.371681	170	0.376106
C12orf34	452	6	292	0.646018	297	0.65708
C12orf35	1747	3	213	0.121923	215	0.123068
C12orf35	1747	5	277	0.158558	281	0.160847
C12orf48	656	3	317	0.483232	319	0.48628
C12orf51	4272	3	394	0.0922285	396	0.0926966
C12orf51	4272	5	2201	0.515215	2205	0.516152
C12orf51	4272	4	2357	0.551732	2360	0.552434
C12orf51	4272	3	2504	0.586142	2506	0.58661
C12orf51	4272	3	2930	0.685861	2932	0.68633
C12orf51	4272	3	2955	0.691713	2957	0.692182
C12orf52	293	3	168	0.573379	170	0.580205
C12orf53	282	3	26	0.0921986	28	0.0992908
C12orf53	282	3	65	0.230496	67	0.237589
C12orf55;C12orf63	3096	4	907	0.292959	910	0.293928
C12orf59	183	3	81	0.442623	83	0.453552
C14orf135	1172	3	262	0.223549	264	0.225256
C14orf135	1172	3	802	0.6843	804	0.686007
C14orf21	636	3	41	0.0644654	43	0.0676101
C14orf43	1045	3	29	0.0277512	31	0.0296651
C14orf43	1045	3	65	0.062201	67	0.0641148
C14orf43	1045	3	128	0.122488	130	0.124402
C14orf43	1045	4	234	0.223923	237	0.226794
C14orf43	1045	3	385	0.368421	387	0.370335
C14orf43	1045	3	656	0.627751	658	0.629665
C14orf43	1045	3	683	0.653589	685	0.655502
C14orf49	975	3	972	0.996923	974	0.998974
C14orf80	495	3	491	0.991919	493	0.99596
C14orf93	538	3	40	0.0743494	42	0.0780669
C14orf93	538	3	247	0.459108	249	0.462825
C15orf2	1156	3	117	0.101211	119	0.102941
C15orf2	1156	3	285	0.24654	287	0.24827
C15orf2	1156	3	352	0.304498	354	0.306228
C15orf2	1156	3	524	0.453287	526	0.455017
C15orf2	1156	3	674	0.583045	676	0.584775
C15orf27	531	3	426	0.80226	428	0.806026
C15orf39	1047	3	270	0.25788	272	0.25979
C15orf39	1047	3	275	0.262655	277	0.264565
C15orf42	1910	5	1374	0.719372	1378	0.721466
C15orf42	1910	3	1829	0.957592	1831	0.958639
C15orf52	534	3	301	0.56367	303	0.567416
C15orf55	1160	3	73	0.062931	75	0.0646552
C15orf55	1160	4	190	0.163793	193	0.166379
C15orf62	175	3	98	0.56	100	0.571429
C16orf11	571	4	140	0.245184	143	0.250438
C16orf11	571	3	191	0.334501	193	0.338004
C16orf11	571	3	526	0.921191	528	0.924694
C16orf45	204	3	177	0.867647	179	0.877451
C16orf48	346	3	176	0.508671	178	0.514451
C16orf5	208	4	5	0.0240385	8	0.0384615
C16orf5	208	3	38	0.182692	40	0.192308
C16orf5	208	3	51	0.245192	53	0.254808
C16orf5	208	3	84	0.403846	86	0.413462
C16orf53	254	3	107	0.42126	109	0.429134
C16orf55	140	3	63	0.45	65	0.464286
C16orf59	433	3	52	0.120092	54	0.124711
C16orf7	631	3	558	0.884311	560	0.88748
C16orf72	275	3	152	0.552727	154	0.56
C16orf90	191	3	82	0.429319	84	0.439791
C16orf91	356	3	121	0.339888	123	0.345506
C16orf91	356	4	146	0.410112	149	0.418539
C16orf93	331	3	68	0.205438	70	0.21148
C16orf96	1141	3	380	0.333041	382	0.334794
C16orf96	1141	3	424	0.371604	426	0.373357
C17orf39	300	3	91	0.303333	93	0.31
C17orf39	300	4	106	0.353333	109	0.363333
C17orf46	384	3	233	0.606771	235	0.611979
C17orf49	233	3	152	0.652361	154	0.660944
C17orf49	233	3	157	0.67382	159	0.682403
C17orf56	525	3	418	0.79619	420	0.8
C17orf59	357	5	231	0.647059	235	0.658263
C17orf63	562	3	179	0.318505	181	0.322064
C17orf65	193	3	144	0.746114	146	0.756477
C17orf72	236	3	186	0.788136	188	0.79661
C17orf74	501	3	230	0.459082	232	0.463074
C17orf74	501	4	280	0.558882	283	0.56487
C17orf74	501	3	440	0.878244	442	0.882236
C17orf79	184	3	162	0.880435	164	0.891304
C17orf96	379	3	215	0.567282	217	0.572559
C17orf96	379	3	293	0.773087	295	0.778364
C17orf96	379	3	347	0.915567	349	0.920844
C17orf99	300	4	41	0.136667	44	0.146667
C18orf1	306	3	54	0.176471	56	0.183007
C18orf1	306	3	180	0.588235	182	0.594771
C18orf1	306	3	251	0.820261	253	0.826797
C19orf24	132	3	41	0.310606	43	0.325758
C19orf26	725	3	399	0.550345	401	0.553103
C19orf26	725	3	501	0.691034	503	0.693793
C19orf29	867	3	600	0.692042	602	0.694348
C19orf29	867	3	734	0.846597	736	0.848904
C19orf35	473	3	56	0.118393	58	0.122622
C19orf43	176	3	84	0.477273	86	0.488636
C19orf45	505	3	61	0.120792	63	0.124752
C19orf45	505	3	87	0.172277	89	0.176238
C19orf45	505	4	336	0.665347	339	0.671287
C19orf48	117	3	67	0.57265	69	0.589744
C19orf54	351	3	53	0.150997	55	0.156695
C19orf54	351	4	59	0.168091	62	0.176638
C19orf55	479	4	381	0.795407	384	0.80167
C19orf67	358	3	19	0.0530726	21	0.0586592
C19orf68	627	3	6	0.00956938	8	0.0127592
C19orf69	130	3	19	0.146154	21	0.161538
C19orf73	129	3	47	0.364341	49	0.379845
C19orf73	129	3	125	0.968992	127	0.984496
C20orf123	566	3	278	0.491166	280	0.4947
C20orf123	566	3	515	0.909894	517	0.913428
C20orf151	664	3	243	0.365964	245	0.368976
C20orf151	664	3	539	0.811747	541	0.814759
C20orf151	664	3	545	0.820783	547	0.823795
C20orf194	1177	3	1046	0.8887	1048	0.890399
C20orf201	240	3	2	0.00833333	4	0.0166667
C20orf26	1237	3	868	0.701698	870	0.703314
C21orf119	61	4	10	0.163934	13	0.213115
C21orf58	322	3	225	0.698758	227	0.704969
C21orf67	218	3	158	0.724771	160	0.733945
C21orf88	145	3	37	0.255172	39	0.268966
C21orf90	65	3	55	0.846154	57	0.876923
C22orf15	157	3	91	0.579618	93	0.592357
C22orf31	290	3	91	0.313793	93	0.32069
C22orf33	280	5	72	0.257143	76	0.271429
C22orf39	142	3	128	0.901408	130	0.915493
C6orf223	242	4	142	0.586777	145	0.599174
C6orf223	242	3	225	0.929752	227	0.938017
C6orf226	101	3	71	0.70297	73	0.722772
C7	843	3	133	0.15777	135	0.160142
C7	843	3	526	0.623962	528	0.626335
C7orf10	471	3	433	0.919321	435	0.923567
C7orf43	580	3	221	0.381034	223	0.384483
C7orf43	580	3	325	0.560345	327	0.563793
C7orf43	580	3	483	0.832759	485	0.836207
C7orf45	244	3	13	0.0532787	15	0.0614754
C7orf60	405	3	22	0.054321	24	0.0592593
C7orf69	122	3	14	0.114754	16	0.131148
C7orf72	438	3	85	0.194064	87	0.19863
C7orf74	235	9	149	0.634043	157	0.668085
C8B	591	3	571	0.966159	573	0.969543
C8orf42	198	3	25	0.126263	27	0.136364
C8orf73	719	3	693	0.963839	695	0.96662
C8orf74	294	3	266	0.904762	268	0.911565
C8orf86	223	3	85	0.381166	87	0.390135
C9orf102	712	3	7	0.00983146	9	0.0126404
C9orf118	69	3	46	0.666667	48	0.695652
C9orf131	1079	3	274	0.253939	276	0.255792
C9orf131	1079	3	341	0.316033	343	0.317887
C9orf131	1079	3	564	0.522706	566	0.52456
C9orf139	190	4	116	0.610526	119	0.626316
C9orf140	394	3	13	0.0329949	15	0.0380711
C9orf140	394	5	116	0.294416	120	0.304569
C9orf169	184	3	145	0.788043	147	0.798913
C9orf171	320	3	30	0.09375	32	0.1
C9orf171	320	3	197	0.615625	199	0.621875
C9orf172	976	4	70	0.0717213	73	0.0747951
C9orf172	976	3	560	0.57377	562	0.57582
C9orf172	976	3	860	0.881148	862	0.883197
C9orf172	976	3	877	0.898566	879	0.900615
C9orf174	1701	3	1366	0.803057	1368	0.804233
C9orf40	194	5	28	0.14433	32	0.164948
C9orf40	194	4	100	0.515464	103	0.530928
C9orf41	409	4	7	0.0171149	10	0.0244499
C9orf43	461	3	187	0.40564	189	0.409978
C9orf47	235	3	188	0.8	190	0.808511
C9orf50	431	3	102	0.236659	104	0.241299
C9orf62	152	4	135	0.888158	138	0.907895
C9orf66	295	3	70	0.237288	72	0.244068
C9orf71	170	3	122	0.717647	124	0.729412
C9orf72	481	3	6	0.012474	8	0.016632
C9orf79	1445	3	23	0.015917	25	0.017301
C9orf79	1445	3	93	0.0643599	95	0.0657439
C9orf79	1445	4	256	0.177163	259	0.179239
C9orf79	1445	3	287	0.198616	289	0.2
C9orf79	1445	3	515	0.356401	517	0.357785
C9orf79	1445	3	923	0.638754	925	0.640138
C9orf79	1445	3	1404	0.971626	1406	0.97301
C9orf82	361	3	324	0.897507	326	0.903047
C9orf86	730	3	344	0.471233	346	0.473973
C9orf86	730	4	373	0.510959	376	0.515068
C9orf86	730	5	609	0.834247	613	0.839726
CABLES1	633	3	31	0.0489731	33	0.0521327
CABLES1	633	3	47	0.0742496	49	0.0774092
CABLES2	478	4	19	0.039749	22	0.0460251
CABLES2	478	5	71	0.148536	75	0.156904
CABLES2	478	4	84	0.175732	87	0.182008
CABP1	370	4	45	0.121622	48	0.12973
CABYR	493	3	156	0.31643	158	0.320487
CACNA1A	2512	3	1179	0.469347	1181	0.470143
CACNA1A	2512	4	2226	0.886146	2229	0.887341
CACNA1A	2512	3	2443	0.972532	2445	0.973328
CACNA1B	2340	3	2043	0.873077	2045	0.873932
CACNA1D	2181	3	74	0.0339294	76	0.0348464
CACNA1F	1977	3	1571	0.794638	1573	0.79565
CACNA1G	2377	3	535	0.225074	537	0.225915
CACNA1G	2377	3	571	0.240219	573	0.24106
CACNA1G	2377	3	597	0.251157	599	0.251998
CACNA1G	2377	3	2118	0.891039	2120	0.891881
CACNA1H	2353	3	18	0.00764981	20	0.00849979
CACNA1I	2229	6	2144	0.961866	2149	0.964109
CACNA1I	2229	3	2209	0.991027	2211	0.991925
CACNB3	484	3	153	0.316116	155	0.320248
CACNG4	327	3	52	0.159021	54	0.165138
CACNG6	260	3	207	0.796154	209	0.803846
CAD	2225	3	391	0.17573	393	0.176629
CAD	2225	3	1700	0.764045	1702	0.764944
CAD	2225	4	1891	0.849888	1894	0.851236
CADM1	471	3	338	0.717622	340	0.721868
CAGE1	839	3	186	0.221692	188	0.224076
CALML4	196	3	10	0.0510204	12	0.0612245
CALY	217	3	213	0.981567	215	0.990783
CAMK2B	666	3	474	0.711712	476	0.714715
CAMK2B	666	3	517	0.776276	519	0.779279
CAMKK1	543	3	44	0.0810313	46	0.0847145
CAMKK1	543	3	174	0.320442	176	0.324125
CAMKK2	588	3	211	0.358844	213	0.362245
CAMTA2	1241	3	295	0.237712	297	0.239323
CAMTA2	1241	3	451	0.363417	453	0.365028
CAMTA2	1241	3	488	0.393231	490	0.394843
CAMTA2	1241	3	492	0.396454	494	0.398066
CAMTA2	1241	3	887	0.714746	889	0.716358
CAMTA2	1241	3	1228	0.989525	1230	0.991136
CAP1	475	6	230	0.484211	235	0.494737
CAP1	475	5	237	0.498947	241	0.507368
CAP2	477	6	232	0.486373	237	0.496855
CAP2	477	3	239	0.501048	241	0.505241
CAP2	477	3	243	0.509434	245	0.513627
CAPN2	729	3	249	0.341564	251	0.344307
CAPN5	680	3	31	0.0455882	33	0.0485294
CAPN7	813	3	170	0.209102	172	0.211562
CAPN7	813	3	624	0.767528	626	0.769988
CAPNS1	268	4	80	0.298507	83	0.309701
CAPNS2	248	3	60	0.241935	62	0.25
CAPRIN1	709	4	17	0.0239774	20	0.0282087
CAPRIN2	1127	4	47	0.0417036	50	0.0443656
CAPS	322	3	40	0.124224	42	0.130435
CARD10	1032	3	257	0.249031	259	0.250969
CARD8	537	3	445	0.828678	447	0.832402
CARHSP1	147	5	5	0.0340136	9	0.0612245
CARM1	608	3	483	0.794408	485	0.797697
CASC3	703	4	392	0.55761	395	0.561878
CASC3	703	4	425	0.604552	428	0.608819
CASC3	703	3	502	0.714083	504	0.716927
CASC3	703	3	601	0.854908	603	0.857752
CASC3	703	3	611	0.869132	613	0.871977
CASC3	703	6	643	0.914651	648	0.921764
CASC3	703	4	692	0.984353	695	0.98862
CASK	926	3	461	0.49784	463	0.5
CASKIN1	1431	4	634	0.443047	637	0.445143
CASKIN1	1431	3	853	0.596087	855	0.597484
CASKIN1	1431	6	945	0.660377	950	0.663871
CASKIN1	1431	4	1163	0.812718	1166	0.814815
CASKIN1	1431	6	1192	0.832984	1197	0.836478
CASKIN1	1431	3	1200	0.838574	1202	0.839972
CASKIN1	1431	3	1212	0.84696	1214	0.848358
CASKIN1	1431	3	1267	0.885395	1269	0.886792
CASKIN1	1431	5	1274	0.890287	1278	0.893082
CASKIN2	1202	3	751	0.624792	753	0.626456
CASKIN2	1202	3	770	0.640599	772	0.642263
CASKIN2	1202	6	868	0.72213	873	0.72629
CASKIN2	1202	3	886	0.737105	888	0.738769
CASKIN2	1202	3	969	0.806156	971	0.80782
CASKIN2	1202	3	1129	0.939268	1131	0.940932
CBFA2T2	614	3	298	0.485342	300	0.488599
CBFA2T3	653	5	81	0.124043	85	0.130168
CBFA2T3	653	3	338	0.517611	340	0.520674
CBL	906	6	543	0.599338	548	0.604857
CBLB	982	4	547	0.557026	550	0.560081
CBLB	982	6	554	0.564155	559	0.569246
CBLB	982	3	562	0.572301	564	0.574338
CBLB	982	4	673	0.685336	676	0.688391
CBLB	982	6	822	0.837067	827	0.842159
CBLB	982	3	973	0.990835	975	0.992872
CBLL1	491	3	211	0.429735	213	0.433809
CBLL1	491	4	241	0.490835	244	0.496945
CBLL1	491	4	271	0.551935	274	0.558045
CBLL1	491	4	308	0.627291	311	0.633401
CBLL1	491	8	343	0.698574	350	0.712831
CBLL1	491	4	373	0.759674	376	0.765784
CBLL1	491	3	381	0.775967	383	0.780041
CBLL1	491	3	386	0.786151	388	0.790224
CBLL1	491	3	402	0.818737	404	0.822811
CBLL1	491	4	406	0.826884	409	0.832994
CBLL1	491	3	419	0.85336	421	0.857434
CBLL1	491	5	460	0.936864	464	0.94501
CBX2	532	3	201	0.37782	203	0.381579
CBX4	560	4	141	0.251786	144	0.257143
CBX6	412	3	237	0.575243	239	0.580097
CBX7	251	3	208	0.828685	210	0.836653
CC2D1A	951	3	121	0.127234	123	0.129338
CC2D1A	951	3	192	0.201893	194	0.203996
CC2D1A	951	4	312	0.328076	315	0.33123
CC2D1A	951	4	342	0.359621	345	0.362776
CC2D1B	858	3	222	0.258741	224	0.261072
CCBE1	406	4	3	0.00738916	6	0.0147783
CCBL1	516	3	135	0.261628	137	0.265504
CCDC101	293	3	141	0.481229	143	0.488055
CCDC102A	550	3	51	0.0927273	53	0.0963636
CCDC105	499	3	87	0.174349	89	0.178357
CCDC105	499	3	281	0.563126	283	0.567134
CCDC105	499	3	489	0.97996	491	0.983968
CCDC108	1925	3	648	0.336623	650	0.337662
CCDC109B	336	4	29	0.0863095	32	0.0952381
CCDC120	661	3	93	0.140696	95	0.143722
CCDC120	661	3	265	0.400908	267	0.403933
CCDC120	661	3	488	0.738275	490	0.741301
CCDC120	661	3	537	0.812405	539	0.815431
CCDC125	511	3	59	0.11546	61	0.119374
CCDC141	1530	3	1267	0.828105	1269	0.829412
CCDC155	562	3	545	0.969751	547	0.97331
CCDC155	562	3	559	0.994662	561	0.998221
CCDC168	2452	4	318	0.12969	321	0.130914
CCDC17	622	3	347	0.557878	349	0.561093
CCDC17	622	4	441	0.709003	444	0.713826
CCDC17	622	3	568	0.913183	570	0.916399
CCDC17	622	3	591	0.950161	593	0.953376
CCDC24	307	3	73	0.237785	75	0.2443
CCDC33	1023	3	781	0.763441	783	0.765396
CCDC34	373	3	327	0.876676	329	0.882038
CCDC36	594	3	104	0.175084	106	0.178451
CCDC50	482	4	442	0.917012	445	0.923237
CCDC57	916	3	550	0.600437	552	0.60262
CCDC6	474	3	428	0.902954	430	0.907173
CCDC6	474	9	440	0.92827	448	0.945148
CCDC63	563	3	477	0.847247	479	0.850799
CCDC64	573	3	91	0.158813	93	0.162304
CCDC8	538	3	88	0.163569	90	0.167286
CCDC85C	419	3	224	0.534606	226	0.539379
CCDC86	360	3	198	0.55	200	0.555556
CCDC87	849	3	637	0.750294	639	0.75265
CCDC88B	1476	3	116	0.0785908	118	0.0799458
CCDC88B	1476	3	432	0.292683	434	0.294038
CCDC88C	2028	3	1397	0.688856	1399	0.689842
CCDC89	374	3	17	0.0454545	19	0.0508021
CCHCR1	871	3	584	0.670494	586	0.67279
CCIN	588	3	565	0.960884	567	0.964286
CCNC	283	3	262	0.925795	264	0.932862
CCNJL	435	3	130	0.298851	132	0.303448
CCNK	600	4	370	0.616667	373	0.621667
CCNK	600	3	390	0.65	392	0.653333
CCNK	600	3	422	0.703333	424	0.706667
CCNK	600	3	433	0.721667	435	0.725
CCNK	600	6	440	0.733333	445	0.741667
CCNK	600	5	502	0.836667	506	0.843333
CCNK	600	4	508	0.846667	511	0.851667
CCNK	600	3	515	0.858333	517	0.861667
CCNK	600	3	520	0.866667	522	0.87
CCNK	600	5	527	0.878333	531	0.885
CCNK	600	5	538	0.896667	542	0.903333
CCNK	600	3	554	0.923333	556	0.926667
CCNK	600	3	566	0.943333	568	0.946667
CCNK	600	3	579	0.965	581	0.968333
CCNK	600	3	583	0.971667	585	0.975
CCNT1	726	3	710	0.977961	712	0.980716
CCNT1	726	4	717	0.987603	720	0.991736
CCNT2	730	5	667	0.913699	671	0.919178
CCT8L2	557	3	544	0.976661	546	0.980251
CD19	557	3	2	0.00359066	4	0.00718133
CD19	557	3	338	0.606822	340	0.610413
CD2	351	5	282	0.803419	286	0.814815
CD2	351	4	297	0.846154	300	0.854701
CD207	328	3	26	0.0792683	28	0.0853659
CD209	404	3	401	0.992574	403	0.997525
CD22	847	3	786	0.927981	788	0.930342
CD248	757	3	430	0.568032	432	0.570674
CD28	234	3	133	0.568376	135	0.576923
CD2AP	639	4	341	0.533646	344	0.538341
CD2AP	639	5	418	0.654147	422	0.660407
CD2BP2	341	3	244	0.715543	246	0.721408
CD320	282	4	101	0.358156	104	0.368794
CD3E	207	3	180	0.869565	182	0.879227
CD3EAP	510	3	137	0.268627	139	0.272549
CD46	399	3	164	0.411028	166	0.41604
CD5	495	3	145	0.292929	147	0.29697
CD55	444	3	279	0.628378	281	0.632883
CD6	668	4	105	0.157186	108	0.161677
CD6	668	3	473	0.708084	475	0.711078
CD6	668	3	634	0.949102	636	0.952096
CD68	354	4	142	0.40113	145	0.409605
CD79A	226	3	128	0.566372	130	0.575221
CD86	329	3	241	0.732523	243	0.738602
CD96	585	3	554	0.947009	556	0.950427
CD96	585	5	559	0.955556	563	0.962393
CD97	835	3	266	0.318563	268	0.320958
CD99L2	272	5	263	0.966912	267	0.981618
CDAN1	1227	3	560	0.456398	562	0.458028
CDAN1	1227	3	653	0.532192	655	0.533822
CDC14A	623	3	591	0.948636	593	0.951846
CDC23	597	4	72	0.120603	75	0.125628
CDC25A	524	3	19	0.0362595	21	0.0400763
CDC37L1	337	3	6	0.0178042	8	0.0237389
CDC42BPA	1781	3	385	0.216171	387	0.217294
CDC42BPG	1551	3	379	0.244358	381	0.245648
CDC42EP5	148	3	56	0.378378	58	0.391892
CDC42EP5	148	4	71	0.47973	74	0.5
CDC73	531	3	349	0.65725	351	0.661017
CDCA3	268	3	14	0.0522388	16	0.0597015
CDCA5	307	3	210	0.684039	212	0.690554
CDCP1	836	3	793	0.948565	795	0.950957
CDCP2	449	4	110	0.244989	113	0.25167
CDCP2	449	3	341	0.759465	343	0.76392
CDH1	900	3	125	0.138889	127	0.141111
CDH15	814	4	485	0.595823	488	0.599509
CDH15	814	3	684	0.840295	686	0.842752
CDH16	829	3	560	0.675513	562	0.677925
CDH22	828	4	27	0.0326087	30	0.0362319
CDH4	916	3	146	0.159389	148	0.161572
CDHR1	859	4	795	0.925495	798	0.928987
CDHR1	859	3	825	0.960419	827	0.962747
CDK12	1490	3	526	0.35302	528	0.354362
CDK12	1490	4	535	0.35906	538	0.361074
CDK12	1490	3	544	0.365101	546	0.366443
CDK12	1490	3	1060	0.711409	1062	0.712752
CDK12	1490	9	1272	0.853691	1280	0.85906
CDK13	1512	7	51	0.0337302	57	0.0376984
CDK13	1512	3	1007	0.666005	1009	0.667328
CDK13	1512	3	1220	0.806878	1222	0.808201
CDK13	1512	3	1267	0.837963	1269	0.839286
CDK16	601	3	94	0.156406	96	0.159734
CDK19	502	3	396	0.788845	398	0.792829
CDK4	303	3	108	0.356436	110	0.363036
CDK5R1	307	3	101	0.32899	103	0.335505
CDK5R2	367	7	155	0.422343	161	0.438692
CDK5RAP1	601	3	86	0.143095	88	0.146423
CDKN1C	316	3	148	0.468354	150	0.474684
CDON	1287	3	1132	0.879565	1134	0.881119
CDRT15L2	281	3	113	0.402135	115	0.409253
CDX1	265	3	35	0.132075	37	0.139623
CDX1	265	3	94	0.354717	96	0.362264
CDX2	313	6	260	0.830671	265	0.846645
CEACAM4	244	3	192	0.786885	194	0.795082
CEBPA	358	3	127	0.354749	129	0.360335
CEBPA	358	7	183	0.511173	189	0.527933
CEBPA	358	3	196	0.547486	198	0.553073
CEBPA	358	3	227	0.634078	229	0.639665
CEBPB	345	5	15	0.0434783	19	0.0550725
CEBPB	345	9	162	0.469565	170	0.492754
CECR2	1443	3	832	0.576577	834	0.577963
CECR2	1443	3	1167	0.808732	1169	0.810118
CECR2	1443	4	1209	0.837838	1212	0.839917
CECR2	1443	3	1301	0.901594	1303	0.90298
CECR6	578	4	19	0.032872	22	0.0380623
CECR6	578	8	541	0.935986	548	0.948097
CEL	756	3	681	0.900794	683	0.903439
CELF3	466	5	355	0.761803	359	0.770386
CELF4	486	3	406	0.835391	408	0.839506
CELF5	485	3	385	0.793814	387	0.797938
CELSR1	3014	5	3	0.000995355	7	0.00232249
CELSR1	3014	3	2936	0.974121	2938	0.974784
CELSR2	2923	4	13	0.00444749	16	0.00547383
CELSR2	2923	3	26	0.00889497	28	0.0095792
CELSR2	2923	3	2878	0.984605	2880	0.985289
CELSR2	2923	3	2882	0.985973	2884	0.986658
CELSR3	3317	3	2399	0.723244	2401	0.723847
CELSR3	3317	3	3162	0.953271	3164	0.953874
CELSR3	3317	3	3174	0.956889	3176	0.957492
CENPV	272	4	78	0.286765	81	0.297794
CENPV	272	8	87	0.319853	94	0.345588
CEP164	1460	3	1290	0.883562	1292	0.884932
CEP89	783	3	36	0.045977	38	0.0485313
CEP89	783	3	218	0.278416	220	0.280971
CFH	1231	3	632	0.513404	634	0.515028
CFH	1231	4	812	0.659626	815	0.662063
CFH	1231	4	1111	0.902518	1114	0.904955
CFHR1	330	4	210	0.636364	213	0.645455
CFHR2	270	4	151	0.559259	154	0.57037
CFHR3	330	4	212	0.642424	215	0.651515
CFHR4	577	4	212	0.367418	215	0.372617
CFHR4	577	4	459	0.795494	462	0.800693
CFHR5	593	3	234	0.394604	236	0.397976
CFHR5	593	4	414	0.698145	417	0.703204
CFHR5	593	3	475	0.801012	477	0.804384
CGB	168	3	147	0.875	149	0.886905
CGB2	163	3	142	0.871166	144	0.883436
CGB5	168	3	147	0.875	149	0.886905
CGB7	165	3	144	0.872727	146	0.884848
CGB8;CGB1	165	3	144	0.872727	146	0.884848
CGNL1	1302	3	77	0.0591398	79	0.0606759
CHAT	748	3	67	0.0895722	69	0.092246
CHCHD10	149	3	27	0.181208	29	0.194631
CHCHD6	256	3	44	0.171875	46	0.179688
CHD3	2059	9	74	0.0359398	82	0.0398252
CHD3	2059	9	84	0.0407965	92	0.0446819
CHD3	2059	4	302	0.146673	305	0.14813
CHD3	2059	3	311	0.151044	313	0.152016
CHD3	2059	3	596	0.289461	598	0.290432
CHD3	2059	3	649	0.315202	651	0.316173
CHD4	1940	3	29	0.0149485	31	0.0159794
CHD4	1940	5	248	0.127835	252	0.129897
CHD4	1940	3	1361	0.701546	1363	0.702577
CHD5	1954	3	498	0.254862	500	0.255885
CHD5	1954	3	551	0.281986	553	0.283009
CHD7	2997	3	393	0.131131	395	0.131798
CHD7	2997	3	409	0.13647	411	0.137137
CHD7	2997	3	731	0.243911	733	0.244578
CHD7	2997	3	735	0.245245	737	0.245913
CHD8	2581	3	68	0.0263464	70	0.0271213
CHERP	927	4	366	0.394822	369	0.398058
CHERP	927	3	371	0.400216	373	0.402373
CHERP	927	3	625	0.674218	627	0.676375
CHERP	927	3	688	0.742179	690	0.744337
CHFR	664	3	11	0.0165663	13	0.0195783
CHIC1	224	4	70	0.3125	73	0.325893
CHKA	457	5	58	0.126915	62	0.135667
CHKA	457	4	72	0.157549	75	0.164114
CHM	653	4	606	0.928025	609	0.932619
CHML	656	4	608	0.926829	611	0.931402
CHMP5	219	3	13	0.0593607	15	0.0684932
CHRD	955	3	744	0.779058	746	0.781152
CHRDL1	458	3	214	0.467249	216	0.471616
CHRFAM7A	412	3	286	0.694175	288	0.699029
CHRM2	466	3	377	0.809013	379	0.813305
CHRM4	479	3	257	0.536534	259	0.54071
CHRM4	479	3	276	0.5762	278	0.580376
CHRM4	479	4	281	0.586639	284	0.592902
CHRNA1	482	3	402	0.834025	404	0.838174
CHRNA2	529	3	32	0.0604915	34	0.0642722
CHRNA2	529	4	383	0.724008	386	0.729679
CHRNA4	627	3	521	0.830941	523	0.834131
CHRNA4	627	3	554	0.883573	556	0.886762
CHRNA7	531	3	405	0.762712	407	0.766478
CHRNB1	501	3	495	0.988024	497	0.992016
CHRND	517	3	497	0.961315	499	0.965184
CHRNE	493	4	357	0.724138	360	0.730223
CHST1	411	3	141	0.343066	143	0.347932
CHST2	530	3	108	0.203774	110	0.207547
CHST5	417	3	288	0.690647	290	0.695444
CHST6	395	3	260	0.658228	262	0.663291
CHSY3	882	3	76	0.0861678	78	0.0884354
CHSY3	882	3	106	0.120181	108	0.122449
CHSY3	882	4	217	0.246032	220	0.249433
CHTF18	1184	3	106	0.089527	108	0.0912162
CHTF18	1184	4	114	0.0962838	117	0.0988176
CHTF18	1184	4	317	0.267736	320	0.27027
CHTF18	1184	3	329	0.277872	331	0.279561
CIC	1608	3	123	0.0764925	125	0.0777363
CIC	1608	4	573	0.356343	576	0.358209
CIC	1608	3	896	0.557214	898	0.558458
CIC	1608	3	909	0.565299	911	0.566542
CIC	1608	3	1232	0.766169	1234	0.767413
CIC	1608	3	1250	0.777363	1252	0.778607
CIC	1608	3	1335	0.830224	1337	0.831468
CIC	1608	3	1538	0.956468	1540	0.957711
CIC	1608	4	1576	0.9801	1579	0.981965
CIC	1608	4	1596	0.992537	1599	0.994403
CIDEB	219	3	32	0.146119	34	0.155251
CIITA	1130	3	267	0.236283	269	0.238053
CILP2	1156	3	1035	0.895329	1037	0.897059
CIRH1A	686	3	676	0.985423	678	0.988338
CISH	275	3	217	0.789091	219	0.796364
CIT	2069	3	372	0.179797	374	0.180764
CITED4	184	4	53	0.288043	56	0.304348
CITED4	184	3	80	0.434783	82	0.445652
CITED4	184	4	122	0.663043	125	0.679348
CIZ1	924	3	162	0.175325	164	0.177489
CIZ1	924	3	650	0.703463	652	0.705628
CKAP4	602	3	36	0.0598007	38	0.0631229
CKAP4	602	5	43	0.0714286	47	0.0780731
CKMT2	419	3	410	0.97852	412	0.983294
CLASP1	1538	3	1139	0.740572	1141	0.741873
CLCA2	943	4	297	0.314952	300	0.318134
CLCA4	919	5	291	0.316649	295	0.321001
CLCN2	898	3	732	0.815145	734	0.817372
CLCN6	953	3	851	0.89297	853	0.895068
CLDN23	292	3	231	0.791096	233	0.797945
CLDN9	217	3	186	0.857143	188	0.866359
CLEC17A	378	3	130	0.343915	132	0.349206
CLEC2L	214	4	13	0.0607477	16	0.0747664
CLINT1	643	3	413	0.642302	415	0.645412
CLIP2	1046	4	531	0.507648	534	0.510516
CLIP3	547	3	11	0.0201097	13	0.023766
CLK3	638	3	190	0.297806	192	0.30094
CLMN	1002	3	345	0.344311	347	0.346307
CLNK	428	3	161	0.376168	163	0.380841
CLNS1A	237	3	8	0.0337553	10	0.0421941
CLPTM1	686	3	259	0.377551	261	0.380466
CLPX	633	5	165	0.260664	169	0.266983
CLSTN3	968	3	838	0.865702	840	0.867769
CMIP	773	3	238	0.307891	240	0.310479
CMTM1	286	3	85	0.297203	87	0.304196
CMTM1	286	3	92	0.321678	94	0.328671
CMTM2	248	4	17	0.0685484	20	0.0806452
CMTM2	248	3	215	0.866935	217	0.875
CNBD1	436	4	21	0.0481651	24	0.0550459
CNDP1	507	3	30	0.0591716	32	0.0631164
CNGA1	759	3	436	0.57444	438	0.577075
CNGA2	664	3	342	0.51506	344	0.518072
CNGA3	698	3	374	0.535817	376	0.538682
CNGA4	575	3	236	0.410435	238	0.413913
CNGB1	1251	3	491	0.392486	493	0.394085
CNGB1	1251	3	1200	0.959233	1202	0.960831
CNKSR1	720	3	511	0.709722	513	0.7125
CNKSR2	1034	4	354	0.34236	357	0.345261
CNKSR2	1034	4	703	0.679884	706	0.682785
CNKSR3	555	3	318	0.572973	320	0.576577
CNKSR3	555	4	347	0.625225	350	0.630631
CNNM2	876	4	224	0.255708	227	0.259132
CNOT1	2376	3	687	0.289141	689	0.289983
CNOT3	753	3	327	0.434263	329	0.436919
CNOT3	753	3	464	0.616202	466	0.618858
CNOT3	753	3	653	0.867198	655	0.869854
CNOT4	767	3	302	0.393742	304	0.396349
CNOT4	767	3	675	0.880052	677	0.88266
CNOT4	767	3	686	0.894394	688	0.897001
CNOT6	557	3	169	0.303411	171	0.307002
CNPPD1	410	3	318	0.77561	320	0.780488
CNPPD1	410	3	322	0.785366	324	0.790244
CNTFR	372	3	328	0.88172	330	0.887097
CNTN2	1040	3	910	0.875	912	0.876923
CNTN3	1028	3	146	0.142023	148	0.143969
CNTN4	1026	3	146	0.1423	148	0.14425
CNTN4	1026	3	899	0.876218	901	0.878168
CNTN5	1100	3	219	0.199091	221	0.200909
CNTN6	1028	3	146	0.142023	148	0.143969
CNTRL	2325	4	1147	0.493333	1150	0.494624
CNTRL	2325	3	1193	0.513118	1195	0.513978
CNTRL	2325	3	1240	0.533333	1242	0.534194
CNTRL	2325	4	1265	0.544086	1268	0.545376
CNTRL	2325	3	1285	0.552688	1287	0.553548
CNTRL	2325	4	1296	0.557419	1299	0.55871
CNTROB	925	3	573	0.619459	575	0.621622
CNTROB	925	3	754	0.815135	756	0.817297
COASY	593	3	20	0.0337268	22	0.0370995
COBL	1343	4	22	0.0163812	25	0.018615
COBL	1343	4	328	0.244229	331	0.246463
COBL	1343	4	363	0.27029	366	0.272524
COBL	1343	4	368	0.274013	371	0.276247
COBL	1343	5	414	0.308265	418	0.311243
COBL	1343	3	420	0.312733	422	0.314222
COBL	1343	4	1103	0.821296	1106	0.823529
COBL	1343	7	1289	0.959792	1295	0.964259
COBLL1	1233	3	1053	0.854015	1055	0.855637
COG6	688	3	463	0.672965	465	0.675872
COIL	576	3	16	0.0277778	18	0.03125
COL12A1	3063	5	2304	0.752204	2308	0.75351
COL13A1	717	3	250	0.348675	252	0.351464
COL15A1	1388	3	529	0.381124	531	0.382565
COL15A1	1388	4	1189	0.856628	1192	0.85879
COL15A1	1388	3	1203	0.866715	1205	0.868156
COL18A1	1754	3	211	0.120296	213	0.121437
COL18A1	1754	3	401	0.22862	403	0.229761
COL18A1	1754	3	405	0.230901	407	0.232041
COL18A1	1754	3	466	0.265678	468	0.266819
COL18A1	1754	3	692	0.394527	694	0.395667
COL20A1	1316	3	468	0.355623	470	0.357143
COL22A1	1626	7	451	0.277368	457	0.281058
COL24A1	1714	3	269	0.156943	271	0.15811
COL27A1	1867	4	435	0.232994	438	0.234601
COL27A1	1867	3	481	0.257633	483	0.258704
COL4A2	1712	3	978	0.571262	980	0.57243
COL4A6	1691	3	238	0.140745	240	0.141928
COL5A1	1838	3	31	0.0168662	33	0.0179543
COL5A1	1838	3	391	0.212731	393	0.213819
COL5A3	1745	3	275	0.157593	277	0.158739
COL6A3	3177	3	1426	0.448851	1428	0.449481
COL6A3	3177	3	1628	0.512433	1630	0.513063
COL6A3	3177	4	3081	0.969783	3084	0.970727
COL6A5	2615	3	2169	0.829446	2171	0.83021
COL6A6	2263	3	1957	0.864781	1959	0.865665
COL8A1	744	3	578	0.776882	580	0.77957
COLQ	456	5	56	0.122807	60	0.131579
COLQ	456	3	63	0.138158	65	0.142544
COLQ	456	3	268	0.587719	270	0.592105
COQ10A	247	3	33	0.133603	35	0.1417
COQ10A	247	3	39	0.157895	41	0.165992
CORO2A	525	3	475	0.904762	477	0.908571
COX10	443	3	440	0.993228	442	0.997743
CPAMD8	1943	3	588	0.302625	590	0.303654
CPAMD8	1943	3	1579	0.812661	1581	0.81369
CPEB2	1034	3	50	0.0483559	52	0.0502901
CPEB2	1034	7	195	0.188588	201	0.194391
CPEB2	1034	5	210	0.203095	214	0.206963
CPEB2	1034	3	373	0.360735	375	0.362669
CPEB2	1034	3	390	0.377176	392	0.37911
CPEB2	1034	3	397	0.383946	399	0.38588
CPEB2	1034	4	406	0.39265	409	0.395551
CPEB2	1034	3	439	0.424565	441	0.426499
CPEB2	1034	6	498	0.481625	503	0.48646
CPEB2	1034	4	512	0.495164	515	0.498066
CPEB3	698	4	90	0.12894	93	0.133238
CPEB3	698	4	166	0.237822	169	0.24212
CPEB4	729	3	258	0.353909	260	0.356653
CPNE5	593	3	567	0.956155	569	0.959528
CPNE8	564	3	550	0.975177	552	0.978723
CPNE9	553	4	538	0.972875	541	0.9783
CPSF6	588	4	226	0.384354	229	0.389456
CPSF6	588	4	289	0.491497	292	0.496599
CPSF6	588	3	297	0.505102	299	0.508503
CPSF6	588	4	310	0.527211	313	0.532313
CPSF6	588	4	333	0.566327	336	0.571429
CPSF6	588	3	342	0.581633	344	0.585034
CPSF6	588	4	346	0.588435	349	0.593537
CPSF6	588	5	353	0.60034	357	0.607143
CPSF6	588	3	376	0.639456	378	0.642857
CPSF6	588	3	383	0.651361	385	0.654762
CPSF6	588	3	388	0.659864	390	0.663265
CPSF6	588	3	400	0.680272	402	0.683673
CPSF6	588	3	415	0.705782	417	0.709184
CPSF6	588	3	424	0.721088	426	0.72449
CPSF7	514	4	94	0.182879	97	0.188716
CPSF7	514	4	281	0.546693	284	0.552529
CPSF7	514	5	286	0.55642	290	0.564202
CPSF7	514	5	298	0.579767	302	0.587549
CPSF7	514	4	311	0.605058	314	0.610895
CPSF7	514	3	323	0.628405	325	0.632296
CPSF7	514	3	340	0.661479	342	0.66537
CPSF7	514	3	348	0.677043	350	0.680934
CPSF7	514	3	370	0.719844	372	0.723735
CPXM2	756	4	98	0.12963	101	0.133598
CPZ	652	3	2	0.00306748	4	0.00613497
CR1	2489	3	299	0.120129	301	0.120932
CR1	2489	3	749	0.300924	751	0.301728
CR1	2489	3	1199	0.48172	1201	0.482523
CR1	2489	3	1649	0.662515	1651	0.663319
CR1	2489	3	1909	0.766975	1911	0.767778
CR1	2489	3	1971	0.791884	1973	0.792688
CR1	2489	3	2031	0.81599	2033	0.816794
CR1	2489	3	2102	0.844516	2104	0.845319
CR1L	569	3	291	0.511424	293	0.514938
CR2	1092	3	26	0.0238095	28	0.025641
CR2	1092	3	279	0.255495	281	0.257326
CR2	1092	4	528	0.483516	531	0.486264
CR2	1092	3	780	0.714286	782	0.716117
CR2	1092	4	911	0.834249	914	0.836996
CRAMP1L	1269	3	476	0.375099	478	0.376675
CRAMP1L	1269	3	512	0.403467	514	0.405043
CRAMP1L	1269	3	649	0.511426	651	0.513002
CRB1	1406	3	1398	0.99431	1400	0.995733
CREB3L2	520	3	134	0.257692	136	0.261538
CREB3L4	395	3	33	0.0835443	35	0.0886076
CREBBP	2472	6	12	0.00485437	17	0.00687702
CREBBP	2472	3	887	0.358819	889	0.359628
CREBBP	2472	3	1452	0.587379	1454	0.588188
CREBBP	2472	4	1975	0.798948	1978	0.800162
CREBBP	2472	3	1981	0.801375	1983	0.802184
CREG2	290	3	96	0.331034	98	0.337931
CRELD1	422	3	33	0.0781991	35	0.0829384
CRELD1	422	3	39	0.0924171	41	0.0971564
CRELD2	402	3	287	0.71393	289	0.718905
CREM	361	3	218	0.603878	220	0.609418
CRH	196	3	49	0.25	51	0.260204
CRHR2	438	3	25	0.0570776	27	0.0616438
CRK	304	3	78	0.256579	80	0.263158
CRLF1	422	3	16	0.0379147	18	0.042654
CRLF1	422	3	237	0.561611	239	0.566351
CRLF2	246	3	44	0.178862	46	0.186992
CRMP1	686	3	642	0.93586	644	0.938776
CRNKL1	848	4	207	0.244104	210	0.247642
CRTAM	393	3	148	0.37659	150	0.381679
CRTC1	650	3	379	0.583077	381	0.586154
CRTC1	650	7	385	0.592308	391	0.601538
CRTC1	650	7	396	0.609231	402	0.618462
CRTC1	650	3	426	0.655385	428	0.658462
CRTC2	693	3	137	0.197691	139	0.200577
CRTC2	693	3	284	0.409812	286	0.412698
CRTC3	619	4	444	0.717286	447	0.722132
CSF2RA	421	3	148	0.351544	150	0.356295
CSF2RA	421	3	344	0.817102	346	0.821853
CSF2RB	903	3	627	0.694352	629	0.696567
CSGALNACT2	542	3	411	0.758303	413	0.761993
CSMD1	3565	3	2091	0.586536	2093	0.587097
CSMD1	3565	3	2261	0.634222	2263	0.634783
CSMD1	3565	3	3101	0.869846	3103	0.870407
CSMD2	3631	4	39	0.0107408	42	0.0115671
CSMD2	3631	3	44	0.0121179	46	0.0126687
CSMD2	3631	3	2000	0.550812	2002	0.551363
CSMD2	3631	3	2293	0.631506	2295	0.632057
CSMD2	3631	3	2345	0.645828	2347	0.646378
CSMD2	3631	3	3158	0.869733	3160	0.870284
CSMD3	3707	3	141	0.0380361	143	0.0385757
CSMD3	3707	3	313	0.0844349	315	0.0849744
CSMD3	3707	4	2397	0.646615	2400	0.647424
CSMD3	3707	3	2924	0.788778	2926	0.789318
CSPG4	2322	3	2294	0.987941	2296	0.988803
CSPG5	566	3	13	0.0229682	15	0.0265018
CSPP1	1256	4	534	0.425159	537	0.427548
CSPP1	1256	3	1119	0.890924	1121	0.892516
CSRP2BP	782	3	386	0.493606	388	0.496164
CSTF2	597	3	387	0.648241	389	0.651591
CSTF3	717	3	624	0.870293	626	0.873082
CTAG2	210	4	185	0.880952	188	0.895238
CTAGE1	745	3	577	0.774497	579	0.777181
CTAGE1	745	3	662	0.888591	664	0.891275
CTAGE1	745	5	689	0.924832	693	0.930201
CTAGE4	777	3	610	0.785071	612	0.787645
CTAGE4	777	3	695	0.894466	697	0.89704
CTAGE4	777	5	722	0.929215	726	0.934363
CTAGE5	809	3	613	0.757726	615	0.760198
CTAGE5	809	3	698	0.862794	700	0.865266
CTAGE5	809	5	725	0.896168	729	0.901112
CTAGE5	809	3	748	0.924598	750	0.92707
CTAGE5	809	4	776	0.959209	779	0.962917
CTAGE8	777	3	610	0.785071	612	0.787645
CTAGE8	777	3	695	0.894466	697	0.89704
CTAGE8	777	5	722	0.929215	726	0.934363
CTAGE9	777	3	610	0.785071	612	0.787645
CTAGE9	777	3	695	0.894466	697	0.89704
CTAGE9	777	5	722	0.929215	726	0.934363
CTCF	727	3	645	0.887208	647	0.889959
CTDP1	961	3	809	0.841831	811	0.843913
CTDSPL	276	3	58	0.210145	60	0.217391
CTLA4	223	3	136	0.609865	138	0.618834
CTNNA1	929	3	826	0.889128	828	0.891281
CTNND1	968	4	358	0.369835	361	0.372934
CTNND2	1225	7	220	0.179592	226	0.18449
CTSA	498	3	24	0.0481928	26	0.0522088
CTSD	412	3	376	0.912621	378	0.917476
CTTNBP2	1663	3	374	0.224895	376	0.226097
CTTNBP2	1663	3	542	0.325917	544	0.32712
CTTNBP2NL	639	3	579	0.906103	581	0.909233
CTU2	515	3	16	0.031068	18	0.0349515
CUBN	3623	3	1356	0.374275	1358	0.374827
CUEDC1	386	3	127	0.329016	129	0.334197
CUEDC1	386	3	152	0.393782	154	0.398964
CUL7	1782	3	1193	0.669473	1195	0.670595
CUL9	2517	3	1434	0.569726	1436	0.57052
CUL9	2517	3	2324	0.923321	2326	0.924116
CUX1	1516	3	440	0.290237	442	0.291557
CUX1	1516	3	1386	0.914248	1388	0.915567
CUX1	1516	3	1450	0.956464	1452	0.957784
CUX2	1486	4	446	0.300135	449	0.302153
CUX2	1486	3	987	0.664199	989	0.665545
CXADR	365	3	282	0.772603	284	0.778082
CXCL12	140	3	128	0.914286	130	0.928571
CXorf30	918	3	624	0.679739	626	0.681917
CXorf64	298	3	95	0.318792	97	0.325503
CXorf64	298	3	267	0.895973	269	0.902685
CXXC5	322	3	54	0.167702	56	0.173913
CYB561	318	3	47	0.147799	49	0.154088
CYB5R1	305	3	280	0.918033	282	0.92459
CYB5R2	276	3	238	0.862319	240	0.869565
CYB5R2	276	3	251	0.90942	253	0.916667
CYB5R3	334	3	296	0.886228	298	0.892216
CYB5R3	334	3	309	0.92515	311	0.931138
CYBA	195	3	155	0.794872	157	0.805128
CYFIP1	1255	3	89	0.0709163	91	0.07251
CYFIP2	1278	3	31	0.0242567	33	0.0258216
CYFIP2	1278	3	1136	0.888889	1138	0.890454
CYLC1	657	5	630	0.958904	634	0.964992
CYLD	956	3	404	0.422594	406	0.424686
CYorf17	182	3	93	0.510989	95	0.521978
CYorf17	182	3	105	0.576923	107	0.587912
CYP26C1	522	3	348	0.666667	350	0.670498
CYP2W1	490	3	458	0.934694	460	0.938776
CYP46A1	500	5	495	0.99	499	0.998
DAAM1	1078	7	550	0.510204	556	0.51577
DAAM1	1078	6	563	0.522263	568	0.526902
DAAM1	1078	5	574	0.532468	578	0.536178
DAAM1	1078	3	580	0.538033	582	0.539889
DAAM1	1078	3	588	0.545455	590	0.54731
DAAM2	1068	4	522	0.488764	525	0.491573
DAAM2	1068	6	541	0.506554	546	0.511236
DAAM2	1068	7	553	0.51779	559	0.523408
DAB1	588	3	456	0.77551	458	0.778912
DAB2	770	3	432	0.561039	434	0.563636
DAB2	770	3	566	0.735065	568	0.737662
DAB2	770	3	622	0.807792	624	0.81039
DAB2IP	1189	10	920	0.773759	929	0.781329
DACT2	774	3	51	0.0658915	53	0.0684755
DACT3	629	3	379	0.602544	381	0.605723
DAG1	895	3	809	0.903911	811	0.906145
DAG1	895	3	827	0.924022	829	0.926257
DAG1	895	4	865	0.96648	868	0.969832
DAG1	895	3	889	0.993296	891	0.995531
DAK	575	3	423	0.735652	425	0.73913
DAZ1	744	5	133	0.178763	137	0.18414
DAZ1	744	5	298	0.400538	302	0.405914
DAZ1	744	5	463	0.622312	467	0.627688
DAZ2	654	5	133	0.203364	137	0.20948
DAZ3	438	5	133	0.303653	137	0.312785
DAZ4	579	5	133	0.229706	137	0.236615
DAZ4	579	5	298	0.51468	302	0.521589
DAZAP1	407	3	222	0.545455	224	0.550369
DAZAP1	407	3	248	0.609337	250	0.614251
DAZAP1	407	6	256	0.628993	261	0.641278
DAZAP1	407	3	275	0.675676	277	0.68059
DAZAP1	407	6	296	0.727273	301	0.739558
DAZAP1	407	4	310	0.761671	313	0.769042
DAZAP1	407	4	324	0.796069	327	0.80344
DAZL	315	4	154	0.488889	157	0.498413
DBN1	695	3	410	0.589928	412	0.592806
DBN1	695	6	414	0.595683	419	0.602878
DBN1	695	3	663	0.953957	665	0.956835
DBNDD1	278	3	70	0.251799	72	0.258993
DBNDD2	263	3	187	0.711027	189	0.718631
DBP	325	4	132	0.406154	135	0.415385
DBT	482	4	227	0.470954	230	0.477178
DBX2	339	3	310	0.914454	312	0.920354
DCAF10	559	4	47	0.0840787	50	0.0894454
DCAF13	597	3	4	0.00670017	6	0.0100503
DCAF13	597	3	17	0.0284757	19	0.0318258
DCAF15	600	3	188	0.313333	190	0.316667
DCAF5	942	3	469	0.497877	471	0.5
DCBLD2	789	4	463	0.586819	466	0.590621
DCBLD2	789	3	722	0.915082	724	0.917617
DCC	1447	3	267	0.18452	269	0.185902
DCC	1447	3	645	0.44575	647	0.447132
DCC	1447	3	1351	0.933656	1353	0.935038
DCHS1	3298	3	1320	0.400243	1322	0.400849
DCHS1	3298	3	2007	0.608551	2009	0.609157
DCHS1	3298	3	2996	0.908429	2998	0.909036
DCHS1	3298	3	3201	0.970588	3203	0.971195
DCHS2	2916	3	2822	0.967764	2824	0.96845
DCK	317	3	272	0.858044	274	0.864353
DCLK2	783	3	765	0.977011	767	0.979566
DCST2	773	3	770	0.996119	772	0.998706
DCTN1	1278	3	548	0.428795	550	0.43036
DCTN1	1278	3	921	0.720657	923	0.722222
DCTN1	1278	3	1051	0.822379	1053	0.823944
DDN	711	3	80	0.112518	82	0.115331
DDN	711	3	224	0.315049	226	0.317862
DDR1	919	3	390	0.424374	392	0.426551
DDR1	919	3	481	0.523395	483	0.525571
DDR1	919	4	559	0.60827	562	0.611534
DDX17	737	3	51	0.0691995	53	0.0719132
DDX24	859	3	265	0.308498	267	0.310827
DDX31	851	3	465	0.546416	467	0.548766
DDX4	724	5	248	0.342541	252	0.348066
DDX41	640	3	195	0.304688	197	0.307812
DDX41	640	3	450	0.703125	452	0.70625
DEAF1	565	3	429	0.759292	431	0.762832
DECR2	292	3	4	0.0136986	6	0.0205479
DEFB124	71	3	62	0.873239	64	0.901408
DEFB125	156	3	146	0.935897	148	0.948718
DEFB129	183	3	160	0.874317	162	0.885246
DEFB129	183	4	164	0.896175	167	0.912568
DENND1A	1020	4	725	0.710784	728	0.713725
DENND1C	801	3	162	0.202247	164	0.204744
DENND2A	1009	4	303	0.300297	306	0.303271
DENND2A	1009	3	311	0.308226	313	0.310208
DENND3	1278	3	238	0.186228	240	0.187793
DENND4A	1906	3	480	0.251836	482	0.252886
DENND4B	1496	3	1077	0.71992	1079	0.721257
DENND4B	1496	3	1086	0.725936	1088	0.727273
DENND4B	1496	3	1418	0.947861	1420	0.949198
DENND4C	1673	3	458	0.27376	460	0.274955
DENND4C	1673	3	1444	0.86312	1446	0.864316
DENND5A	1287	3	235	0.182595	237	0.184149
DENND5A	1287	3	254	0.197358	256	0.198912
DENND5B	1309	3	255	0.194805	257	0.196333
DENND5B	1309	3	274	0.20932	276	0.210848
DEPDC1	811	3	610	0.752158	612	0.754624
DEPDC5	1594	3	818	0.513174	820	0.514429
DEXI	95	3	21	0.221053	23	0.242105
DFNB31	907	3	585	0.644983	587	0.647189
DGCR14	476	4	98	0.205882	101	0.212185
DGCR2	550	4	429	0.78	432	0.785455
DGCR2	550	4	447	0.812727	450	0.818182
DGCR8	773	4	36	0.0465718	39	0.0504528
DGKA	735	3	723	0.983673	725	0.986395
DGKB	804	3	784	0.975124	786	0.977612
DGKD	1214	3	8	0.00658979	10	0.00823723
DGKD	1214	7	15	0.0123558	21	0.0172982
DGKD	1214	3	566	0.466227	568	0.467875
DGKZ	1117	4	143	0.128021	146	0.130707
DGKZ	1117	4	256	0.229185	259	0.231871
DGKZ	1117	4	560	0.501343	563	0.504029
DHX15	795	4	403	0.506918	406	0.510692
DHX16	1041	3	783	0.752161	785	0.754083
DHX29	1369	3	919	0.671293	921	0.672754
DHX34	1143	3	2	0.00174978	4	0.00349956
DHX34	1143	4	548	0.47944	551	0.482065
DHX35	703	3	450	0.640114	452	0.642959
DHX37	1157	3	27	0.0233362	29	0.0250648
DHX37	1157	4	217	0.187554	220	0.190147
DHX37	1157	3	426	0.368194	428	0.369922
DHX37	1157	3	608	0.525497	610	0.527226
DHX37	1157	3	696	0.601556	698	0.603284
DHX38	1227	3	914	0.744906	916	0.746536
DHX40	779	4	333	0.427471	336	0.431322
DHX8	1220	3	257	0.210656	259	0.212295
DHX9	1270	3	88	0.0692913	90	0.0708661
DHX9	1270	3	299	0.235433	301	0.237008
DHX9	1270	3	586	0.461417	588	0.462992
DHX9	1270	3	823	0.648031	825	0.649606
DIAPH1	1273	4	597	0.468971	600	0.471328
DIAPH1	1273	13	608	0.477612	620	0.487038
DIAPH1	1273	4	641	0.503535	644	0.505892
DIAPH1	1273	5	652	0.512176	656	0.515318
DIAPH1	1273	5	676	0.531029	680	0.534171
DIAPH1	1273	6	688	0.540456	693	0.544383
DIAPH1	1273	6	701	0.550668	706	0.554595
DIAPH1	1273	6	714	0.56088	719	0.564808
DIAPH1	1273	5	727	0.571092	731	0.574234
DIAPH1	1273	5	739	0.580518	743	0.583661
DIAPH1	1273	5	748	0.587588	752	0.590731
DIAPH2	1103	6	569	0.515866	574	0.520399
DIAPH2	1103	6	585	0.530372	590	0.534905
DIAPH2	1103	7	598	0.542158	604	0.547597
DIAPH2	1103	6	610	0.553037	615	0.55757
DIAPH2	1103	4	620	0.562103	623	0.564823
DIAPH3	1193	4	44	0.0368818	47	0.0393965
DIAPH3	1193	5	576	0.482816	580	0.486169
DIAPH3	1193	11	588	0.492875	598	0.501257
DIAPH3	1193	5	611	0.512154	615	0.515507
DIAPH3	1193	3	940	0.78793	942	0.789606
DIDO1	2240	4	50	0.0223214	53	0.0236607
DIDO1	2240	6	1261	0.562946	1266	0.565179
DIDO1	2240	3	1523	0.679911	1525	0.680804
DIDO1	2240	3	1737	0.775446	1739	0.776339
DIDO1	2240	3	1795	0.801339	1797	0.802232
DIDO1	2240	3	1817	0.811161	1819	0.812054
DIDO1	2240	3	1907	0.851339	1909	0.852232
DIDO1	2240	3	1918	0.85625	1920	0.857143
DIP2A	1572	3	687	0.437023	689	0.438295
DIS3	958	3	694	0.724426	696	0.726514
DIS3L	1054	3	710	0.673624	712	0.675522
DIS3L2	885	3	611	0.690395	613	0.692655
DISP2	1401	3	72	0.0513919	74	0.0528194
DISP2	1401	3	733	0.523198	735	0.524625
DISP2	1401	3	1207	0.861527	1209	0.862955
DKK1	266	3	46	0.172932	48	0.180451
DLAT	647	3	319	0.493045	321	0.496136
DLAT	647	3	323	0.499227	325	0.502318
DLEC1	1778	3	473	0.266029	475	0.267154
DLG1	926	3	197	0.212743	199	0.214903
DLG3	849	3	237	0.279152	239	0.281508
DLG5	1919	3	133	0.0693069	135	0.0703491
DLGAP1	977	3	542	0.554759	544	0.556807
DLGAP1	977	3	767	0.785056	769	0.787103
DLGAP1	977	3	913	0.934493	915	0.93654
DLGAP2	1006	3	579	0.575547	581	0.577535
DLGAP2	1006	3	794	0.789264	796	0.791252
DLGAP2	1006	3	940	0.934394	942	0.936382
DLGAP3	979	3	541	0.552605	543	0.554648
DLGAP3	979	3	913	0.932584	915	0.934627
DLGAP4	992	3	65	0.0655242	67	0.0675403
DLGAP4	992	5	267	0.269153	271	0.273185
DLGAP4	992	3	535	0.539315	537	0.541331
DLGAP4	992	3	561	0.565524	563	0.56754
DLGAP4	992	3	635	0.640121	637	0.642137
DLGAP4	992	3	778	0.784274	780	0.78629
DLGAP4	992	4	925	0.93246	928	0.935484
DLL1	723	3	51	0.0705394	53	0.0733057
DLST	453	3	174	0.384106	176	0.388521
DLX3	287	3	232	0.808362	234	0.815331
DLX3	287	3	279	0.972125	281	0.979094
DLX5	289	3	272	0.941176	274	0.948097
DLX6	293	9	45	0.153584	53	0.180887
DMD	3685	5	704	0.191045	708	0.19213
DMKN	476	3	232	0.487395	234	0.491597
DMKN	476	3	382	0.802521	384	0.806723
DMRT1	373	3	168	0.450402	170	0.455764
DMRT1	373	3	295	0.790885	297	0.796247
DMRT2	561	3	39	0.0695187	41	0.0730838
DMRT2	561	3	227	0.404635	229	0.4082
DMRT3	472	4	97	0.205508	100	0.211864
DMRT3	472	3	109	0.230932	111	0.235169
DMRTA1	504	4	28	0.0555556	31	0.0615079
DMRTA2	542	3	211	0.389299	213	0.392989
DMRTB1	342	6	265	0.774854	270	0.789474
DMRTB1	342	9	296	0.865497	304	0.888889
DMRTC2	367	3	189	0.514986	191	0.520436
DMWD	674	3	61	0.0905045	63	0.0934718
DMWD	674	3	80	0.118694	82	0.121662
DMXL2	3037	3	885	0.291406	887	0.292065
DMXL2	3037	3	2436	0.802107	2438	0.802766
DMXL2	3037	3	2568	0.845571	2570	0.84623
DNAAF1	725	6	447	0.616552	452	0.623448
DNAAF1	725	5	499	0.688276	503	0.693793
DNAAF2	837	3	422	0.504182	424	0.506571
DNAH1	4265	3	2944	0.69027	2946	0.690739
DNAH10OS	163	3	23	0.141104	25	0.153374
DNAH12	3092	3	77	0.024903	79	0.0255498
DNAH12	3092	3	2478	0.801423	2480	0.80207
DNAH5	4624	3	2519	0.544766	2521	0.545199
DNAH7	4024	3	3412	0.847913	3414	0.84841
DNAH7	4024	3	3869	0.961481	3871	0.961978
DNAI1	699	3	215	0.307582	217	0.310443
DNAJB12	409	3	95	0.232274	97	0.237164
DNAJC1	554	5	23	0.0415162	27	0.0487365
DNAJC13	2243	3	2229	0.993758	2231	0.99465
DNAJC30	226	3	141	0.623894	143	0.632743
DNAJC5G	189	3	152	0.804233	154	0.814815
DNAJC6	970	4	548	0.564948	551	0.568041
DNASE1L2	299	3	154	0.51505	156	0.521739
DNASE2	360	3	136	0.377778	138	0.383333
DND1	353	3	45	0.127479	47	0.133144
DND1	353	3	53	0.150142	55	0.155807
DNHD1	4753	4	891	0.187461	894	0.188092
DNHD1	4753	3	2324	0.488954	2326	0.489375
DNHD1	4753	3	4093	0.86114	4095	0.861561
DNM1	864	3	755	0.873843	757	0.876157
DNM1	864	3	802	0.928241	804	0.930556
DNM1	864	3	828	0.958333	830	0.960648
DNM2	870	3	749	0.86092	751	0.863218
DNM3	873	3	759	0.869416	761	0.871707
DNM3	873	3	774	0.886598	776	0.888889
DNM3	873	3	854	0.978236	856	0.980527
DNMBP	1601	4	610	0.381012	613	0.382886
DNMBP	1601	3	1432	0.894441	1434	0.89569
DNMT1	1632	3	1597	0.978554	1599	0.979779
DNMT3A	912	4	450	0.493421	453	0.496711
DOCK1	1865	3	1768	0.947989	1770	0.949062
DOCK1	1865	3	1799	0.964611	1801	0.965684
DOCK1	1865	6	1826	0.979088	1831	0.981769
DOCK1	1865	3	1837	0.984987	1839	0.986059
DOCK1	1865	6	1845	0.989276	1850	0.991957
DOCK4	1999	3	1933	0.966983	1935	0.967984
DOCK5	1870	3	1790	0.957219	1792	0.958289
[truncated: 6,430 more rows]
